# Supplementary material for: New insights into the FLPergic complements of parasitic nematodes: Informing deorphanisation approaches
Source: PubMed Central journal article supplement (PMC4405611; doi:10.1016/j.euprot.2014.04.002), 2014-04-19
Supplement: mmc2.pdf [file mmc2.pdf]

## 1. FLP-1 sequelogs

|                              |                            |                   |            |                        |
|------------------------------|----------------------------|-------------------|------------|------------------------|
| <i>T. spiralis</i> FLP-1     | -----SVPSFLRFG             | ----SVLEPNFLRFG   | -----      | -----NSPNFLRFG         |
| <i>T. muris</i> FLP-1        | -----VNFLRFG               | ----KMTNPNFLRFG   | -----      | -----APNSPNFLRFG       |
| <i>B. malayi</i> FLP-1       | -----KPNFIRFG              | -----             | -----      | FLQFGHSSSAFTPSGQNFRLFG |
| <i>W. bancrofti</i> FLP-1    | -----KPNFIRFG              | -----             | -----      | FLQFGHSSSAFTPSGQNFRLFG |
| <i>D. immitis</i> FLP-1      | -----KPNFIRFG              | -----             | -----      | -----SSSIFTPGGQNFRLFG  |
| <i>O. volvulus</i> FLP-1     | -----KPNFIRFG              | -----             | -----      | -----SSSAFTPSGQNFRLFG  |
| <i>O. ochengi</i> FLP-1      | -----KPNFIRFG              | -----             | -----      | -----SSSAFTPSGQNFRLFG  |
| <i>L. loa</i> FLP-1          | -----KPNFIRFG              | -----             | -----      | FLQFGHSSSAFTPGRQNFRLFG |
| <i>A. suum</i> FLP-1         | -----KPNFIRFG              | -----GSDPNFLRFG   | TPSNFLRFG  | -----SNQAQNFRLFG       |
| <i>A. caninum</i> FLP-1      | -----KPNFMRYG              | -----GSDPNFLRFG   | -----      | -----NQPNFLRFG         |
| <i>N. brasiliensis</i> FLP-1 | -----KPNFMRYG              | -----GADPNFLRFG   | -----      | -----NQPSFLRFG         |
| <i>H. contortus</i> FLP-1    | -----KPNFMRYG              | -----GSDPNFLRFG   | -NQPNFLRFG | -----NQPNFLRFG         |
| <i>C. elegans</i> FLP-1      | -----KPNFMRYG              | -----AGSDPNFLRFG  | -----      | -----SQPNFLRFG         |
| <i>S. ratti</i> FLP-1        | -----KPNFIRYG              | -----AADPNFLRFG   | SEHQNFLRFG | -----NLGGNNAFLRFG      |
| <i>B. xylophilus</i> FLP-1   | -----GSEPNFLRFG            | AAPAPNAAGANFLRFG  | -----      | -----SGADPNFLRFG       |
| <i>G. pallida</i> FLP-1      | -----SDPNFLRFG             | -----TSSNFLRFG    | -----      | -----SSASMSTSEPNFLRFG  |
| <i>M. hapla</i> FLP-1        | -NSLLMSGPWALNSWSEADPNFLRFG | -----AAQSANFLRFG  | -----      | -----SAPYDPNFLRFG      |
| <i>M. incognita</i> FLP-1    | -NSLLMSGPWALNSWSDADPNFLRFG | ----AAQSANFLRFG   | -----      | -----SAPYDPNFLRFG      |
| Consensus                    | KPNFIRFG                   | GSDKPNFLRFG       | NNFLRFG    | P PNFLRFG              |
| <i>T. spiralis</i> FLP-1     | -----                      | -----AAAAFLRFG    | -----      | ---ASPFLRFG            |
| <i>T. muris</i> FLP-1        | -----                      | -----             | -----      | -----                  |
| <i>B. malayi</i> FLP-1       | -----                      | AAEPNFLHLDPNFLRFG | -----      | --SAEPNFLRFG           |
| <i>W. bancrofti</i> FLP-1    | -----                      | EAEPNFLHFDPNFLRFG | -----      | --SAEPNFLRFG           |
| <i>D. immitis</i> FLP-1      | -----                      | -----AVEPNFLRFG   | -----      | --SAEPNFLRFG           |
| <i>O. volvulus</i> FLP-1     | AAEPNFLRFG                 | -----NFLRFG       | -----      | --SAEPNFLRFG           |
| <i>O. ochengi</i> FLP-1      | AAEPNFLRFG                 | -----NFLRFG       | -----      | --SAEPNFLRFG           |
| <i>L. loa</i> FLP-1          | AAEPNFLRFG                 | -----PNFLRFG      | -----      | --SAEPNFLRFG           |
| <i>A. suum</i> FLP-1         | NAEPNFLRFG                 | -----PADPNFLRFG   | -----      | --SAEPNFLRFG           |
| <i>A. caninum</i> FLP-1      | -----                      | -----EPNFLRFG     | -----      | -ASADPNFLRFG           |
| <i>N. brasiliensis</i> FLP-1 | -----                      | -----AAGDPNFLRFG  | -----      | -AAGDPNFLRFG           |
| <i>H. contortus</i> FLP-1    | -----                      | -----AAGDPNFLRFG  | -----      | -GAGDPNFLRFG           |
| <i>C. elegans</i> FLP-1      | -----                      | -----ASGDPNFLRFG  | SDPNFLRFG  | -AAADPNFLRFG           |
| <i>S. ratti</i> FLP-1        | SNSPDPFLRFG                | -----AAGDPNFLRFG  | -----      | -----PNFLRFG           |
| <i>B. xylophilus</i> FLP-1   | -----                      | -----             | -----      | LDATEPNFLRFG           |
| <i>G. pallida</i> FLP-1      | -----                      | -----             | -----      | -GGVDPTFLRFG           |

|                              |                                  |                   |                     |                                |
|------------------------------|----------------------------------|-------------------|---------------------|--------------------------------|
| <i>M. hapla</i> FLP-1        | -----                            | -----             | -----               | -GLV <b>D</b> QSY <b>L</b> RFG |
| <i>M. incognita</i> FLP-1    | -----                            | -----             | -----               | -GLVGQSY <b>L</b> RFG          |
| Consensus                    | AAEPN <b>F</b> LRFG              | DPN <b>F</b> LRFG | SAEPN <b>F</b> LRFG |                                |
| <i>T. spiralis</i> FLP-1     | -----AN <b>F</b> LRFG            | -----             | -----               | --AA <b>F</b> LRFG             |
| <i>T. muris</i> FLP-1        | ---LAGN <b>F</b> LRFG            | -----             | -----               | --AVGN <b>F</b> LRFG           |
| <i>B. malayi</i> FLP-1       | --TEVG <b>D</b> PN <b>F</b> LRFG | -----             | -----               | ---K <b>P</b> N <b>F</b> LRFG  |
| <i>W. bancrofti</i> FLP-1    | --TEVG <b>D</b> PN <b>F</b> LRFG | -----             | -----               | ---K <b>P</b> N <b>F</b> LRFG  |
| <i>D. immitis</i> FLP-1      | --IEVNE <b>P</b> N <b>F</b> LRLG | -----             | -----               | ---K <b>P</b> N <b>F</b> LRFG  |
| <i>O. volvulus</i> FLP-1     | --IEANE <b>P</b> N <b>F</b> LQFG | -----             | -----               | ---K <b>P</b> N <b>F</b> LRFG  |
| <i>O. ochengi</i> FLP-1      | --IEANE <b>P</b> N <b>F</b> LQFG | -----             | -----               | ---K <b>P</b> N <b>F</b> LRFG  |
| <i>L. loa</i> FLP-1          | --IELR <b>D</b> PN <b>F</b> LRFG | -----             | QN <b>F</b> LRFG    | -AAE <b>P</b> N <b>F</b> LRFG  |
| <i>A. suum</i> FLP-1         | SDIGISE <b>P</b> N <b>F</b> LRFG | NN <b>F</b> LRFG  | -----               | ---K <b>P</b> N <b>F</b> LRFG  |
| <i>A. caninum</i> FLP-1      | ----AV <b>D</b> PN <b>F</b> LRFG | -----             | -----               | ---K <b>P</b> N <b>F</b> LRFG  |
| <i>N. brasiliensis</i> FLP-1 | ----AV <b>D</b> PN <b>F</b> LRFG | -----             | -----               | ---K <b>P</b> N <b>F</b> LRFG  |
| <i>H. contortus</i> FLP-1    | ----GV <b>D</b> PN <b>F</b> LRFG | -----             | -----               | ---K <b>P</b> N <b>F</b> LRFG  |
| <i>C. elegans</i> FLP-1      | ----SA <b>D</b> PN <b>F</b> LRFG | -----             | -----               | ---K <b>P</b> N <b>F</b> LRFG  |
| <i>S. ratti</i> FLP-1        | ---STTNT <b>N</b> LRFG           | -----             | -----               | --LQ <b>P</b> D <b>F</b> LRFG  |
| <i>B. xylophilus</i> FLP-1   | PDPSAMSN <b>N</b> LRFG           | -----             | -----               | --QSN <b>N</b> LRFG            |
| <i>G. pallida</i> FLP-1      | -----ANN <b>N</b> LRFG           | -----             | -----               | -QAN <b>P</b> N <b>F</b> LRFG  |
| <i>M. hapla</i> FLP-1        | --SGAKAN <b>N</b> LRFG           | -----             | -----               | QSNN <b>P</b> N <b>F</b> LRFG  |
| <i>M. incognita</i> FLP-1    | SSGGNKGN <b>N</b> LRFG           | -----             | -----               | QSNN <b>P</b> N <b>F</b> LRFG  |
| Consensus                    | DPN <b>F</b> LRFG                |                   |                     | KPN <b>F</b> LRFG              |

## 2. FLP-2 sequelogues

|                              |                         |            |
|------------------------------|-------------------------|------------|
| <i>A. suum</i> FLP-2         | -FRGEPIRFG              | -AQREPIRFG |
| <i>A. caninum</i> FLP-2      | -FRGEPIRFG              | -VPREPIRFG |
| <i>H. contortus</i> FLP-2    | -FRGEPIRFG              | -VPREPIRFG |
| <i>N. brasiliensis</i> FLP-2 | -----EPIRFG             | -VPREPIRFG |
| <i>C. elegans</i> FLP-2      | -LRGEPIRFG              | -SPREPIRFG |
| <i>S. ratti</i> FLP-2        | -FRGEPIRFG              | SSFREPIRFG |
| <i>B. xylophilus</i> FLP-2   | -FRGEPVRFG              | -AYREPIRFG |
| <i>G. pallida</i> FLP-2/30   | PYFR <del>E</del> PLRFG | -----      |
| <i>M. hapla</i> FLP-2/30     | -QMR <del>E</del> PLRFG | -----      |
| <i>M. incognita</i> FLP-2/30 | -QMR <del>E</del> PLRFG | -----      |
| Consensus                    | FRGEPIRFG               | APREPIRFG  |



|                            |           |               |                |           |
|----------------------------|-----------|---------------|----------------|-----------|
| <i>B. malayi</i> FLP-3     | -----     | -----         | -----          | -----     |
| <i>W. bancrofti</i> FLP-3  | -----     | -----         | -----          | -----     |
| <i>D. immitis</i> FLP-3    | -----     | -----         | -----          | -----     |
| <i>O. volvulus</i> FLP-3   | -----     | -----         | -----          | -----     |
| <i>O. ochengi</i> FLP-3    | -----     | -----         | -----          | -----     |
| <i>L. loa</i> FLP-3        | -----     | -----         | -----          | -----     |
| <i>A. suum</i> FLP-3       | -----     | --GDPLGTMRFG  | ----GGPLGTMRFG | -----     |
| <i>C. elegans</i> FLP-3    | -----     | EAEELPLGTMRFG | SADDSAPFGTMRFG | NPLGTMRFG |
| <i>S. ratti</i> FLP-3      | -----     | -----         | -TAKPNPLGTMRFG | -----     |
| <i>B. xylophilus</i> FLP-3 | NPLGTMRFG | ---NPLGTMRFG  | ---AEGPLGTMRFG | -----     |
| <i>M. incognita</i> FLP-3  | -----     | RNTSPLGTMR--  | -----          | -----     |
| <i>M. hapla</i> FLP-3      | -----     | RNSPLGTMRFG   | -----          | -----     |
| <i>G. pallida</i> FLP-3    | -----     | KFNSPLGTMRFG  | -GHNNAPFGTMRFG | -----     |
| Consensus                  |           | R SPLGTMRFG   | APLGTMRFG      |           |

#### 4. FLP-4 sequelogues

|                              |               |           |           |
|------------------------------|---------------|-----------|-----------|
| <i>B. malayi</i> FLP-4       | --SHGKPTFIRFG | -----     | -----     |
| <i>W. bancrofti</i> FLP-4    | --SHGKPTFIRFG | -----     | -----     |
| <i>D. immitis</i> FLP-4      | --SHAKPTFIRFG | -----     | -----     |
| <i>O. ochengi</i> FLP-4      | --SHGKPTFIRFG | -----     | -----     |
| <i>O. volvulus</i> FLP-4     | --SHGKPTFIRFG | -----     | -----     |
| <i>A. suum</i> FLP-4         | ---SGKPTFIRFG | -----     | -----     |
| <i>A. caninum</i> FLP-4      | SSSNGKPTFIRFG | AQPSFIRFG | AQPSFIRFG |
| <i>N. brasiliensis</i> FLP-4 | ---SGKPTFIRFG | AQPSFIRFG | AQPSFIRFG |
| <i>C. elegans</i> FLP-4      | -SSNGKPTFIRFG | ASPSFIRFG | -----     |
| <i>B. xylophilus</i> FLP-4   | --SNGKPTFIRFG | -----     | -----     |
| Consensus                    | SHGKPTFIRFG   | AQPSFIRFG | AQPSFIRFG |

## 5. FLP-5 sequelogues

|                              |               |              |           |
|------------------------------|---------------|--------------|-----------|
| <i>A. suum</i> FLP-5         | ---SPKQKFIRFG | --AGSARFIRFG | ACPRFIRFG |
| <i>A. caninum</i> FLP-5      | -----APKFIRFG | --GGGAKFIRFG | -AAKFIRFG |
| <i>N. brasiliensis</i> FLP-5 | -----APKFIRFG | --AGGAKFIRFG | -AAKFIRFG |
| <i>H. contortus</i> FLP-5    | -----APKFIRFG | --AGGAKFIRFG | -----     |
| <i>C. elegans</i> FLP-5      | ---APKPKFIRFG | ---AGAKFIRFG | -GAKFIRFG |
| <i>S. ratti</i> FLP-5        | ----AGQKLIRFG | -GG--QKLIRFG | GGQKLIRFG |
| <i>B. xylophilus</i> FLP-5   | ---APKAKFIRFG | -AG--QKFIRFG | -----     |
| <i>G. pallida</i> FLP-5      | ---VPKPKFIRFG | -AG--QKLIRFG | -AQKFIRFG |
| <i>M. hapla</i> FLP-5        | ---SPKPKFIRFG | SAGNNQKFIRFG | -AQKFIRFG |
| <i>M. incognita</i> FLP-5    | ---SPKPKFIRFG | SAGNNQKFIRFG | -AQKFIRFG |
| Consensus                    | SPKPKFIRFG    | AG QKFIRFG   | AQKFIRFG  |

## 6. FLP-6 sequelogues

|                              |          |          |          |          |
|------------------------------|----------|----------|----------|----------|
| <i>B. malayi</i> FLP-6       | -----    | -----    | KSSYMRFG | KSAYMRFG |
| <i>W. bancrofti</i> FLP-6    | -----    | -----    | KSSYMRFG | KSAYMRFG |
| <i>D. immitis</i> FLP-6      | -----    | -----    | KSSYMRFG | KSAYMRFG |
| <i>O. ochengi</i> FLP-6      | -----    | -----    | KSSYMRFG | KSAYMRFG |
| <i>O. volvulus</i> FLP-6     | -----    | -----    | KSSYMRFG | KSAYMRFG |
| <i>L. loa</i> FLP-6          | -----    | -----    | KSSYMRFG | KSAYMRFG |
| <i>A. suum</i> FLP-6         | -----    | KSAYMRFG | KSAYMRFG | KSAYMRFG |
| <i>A. caninum</i> FLP-6      | -----    | KSAYMRFG | KSAYMRFG | KSAYMRFG |
| <i>N. brasiliensis</i> FLP-6 | -----    | KSAYMRFG | KSAYMRFG | KSAYMRFG |
| <i>H. contortus</i> FLP-6    | -----    | KSAYMRFG | KSAYMRFG | KSAYMRFG |
| <i>C. elegans</i> FLP-6      | -----    | KSAYMRFG | KSAYMRFG | KSAYMRFG |
| <i>S. ratti</i> FLP-6        | -----    | KSAYMRFG | KSAYMRFG | KSAYMRFG |
| <i>B. xylophilus</i> FLP-6   | -----    | KSAYMRFG | KSAYMRFG | KSAYMRFG |
| <i>G. pallida</i> FLP-6      | -----    | KSAYMRFG | KSAYMRFG | KSAYMRFG |
| <i>M. hapla</i> FLP-6        | KSAYMRLG | KSAYMRFG | KSAYMRFG | KSAYMRFG |
| <i>M. incognita</i> FLP-6    | KSAYMRLG | KSAYMRFG | KSAYMRFG | KSAYMRFG |

Consensus KSAYMRLG KSAYMRFG KSAYMRFG KSAYMRFG

|                              |          |          |          |
|------------------------------|----------|----------|----------|
| <i>B. malayi</i> FLP-6       | KSAYMRFG | -----    | -----    |
| <i>W. bancrofti</i> FLP-6    | KSAYMR-- | -----    | -----    |
| <i>D. immitis</i> FLP-6      | KSAYMRFG | -----    | -----    |
| <i>O. ochengi</i> FLP-6      | KSAYMRFG | -----    | -----    |
| <i>O. volvulus</i> FLP-6     | KSAYMRFG | -----    | -----    |
| <i>L. loa</i> FLP-6          | KSAYMR-- | -----    | -----    |
| <i>A. suum</i> FLP-6         | KSAYMRFG | KSAYMRFG | -----    |
| <i>A. caninum</i> FLP-6      | KSAYMRFG | KSAYMRFG | -----    |
| <i>N. brasiliensis</i> FLP-6 | KSAYMRFG | KSAYMRFG | -----    |
| <i>H. contortus</i> FLP-6    | KSAYMR-- | -----    | -----    |
| <i>C. elegans</i> FLP-6      | KSAYMRFG | KSAYMRFG | KSAYMRFG |
| <i>S. ratti</i> FLP-6        | KSAYMRFG | KVAALRFG | -----    |
| <i>B. xylophilus</i> FLP-6   | KSAYMRFG | -----    | -----    |
| <i>G. pallida</i> FLP-6      | KSAYMRFG | -----    | -----    |
| <i>M. hapla</i> FLP-6        | KSAYMR-- | -----    | -----    |
| <i>M. incognita</i> FLP-6    | KSAYMR-- | -----    | -----    |

Consensus KSAYMRFG KSAYMRFG



## 7. FLP-7 sequeleques

|                              |              |              |              |              |
|------------------------------|--------------|--------------|--------------|--------------|
| <i>A. suum</i> FLP-7         | TPMDRSSMVRFG | -----        | APMDRISMVRFG | MPIDRSSMVRFG |
| <i>A. caninum</i> FLP-7      | APMDRSSMVRFG | APMDRSSMVRFG | APMDRSSIVRFG | APMDRSSMVRFG |
| <i>N. brasiliensis</i> FLP-7 | ATMDRSSMVRFG | APMDRSTMVRFG | APMDRSTMVRFG | APMDRASMVRFG |
| <i>H. contortus</i> FLP-7    | -----SSIFRFG | APMDRSAMVRFG | APMDRSAMVRFG | APMDRSSMVRFG |
| <i>C. elegans</i> FLP-7      | TPMQRSSMVRFG | SPMQRSSMVRFG | SPMQRSSMVRFG | SPMERSAMVRFG |
| <i>S. ratti</i> FLP-7        | APMDRSSMIKFG | AQLDR-AMVRFG | APLDRSSMVRFG | APLDR-AMVRFG |
| <i>G. pallida</i> FLP-7      | -----        | -----        | APLDRSAMARFG | APLDRSALARFG |
| <i>M. hapla</i> FLP-7        | APFDRSALVRFG | APFDRSALVRFG | APLDRAAMVRFG | APFDRSSMVRFG |
| <i>M. incognita</i> FLP-7    | APLDRSALVRFG | APLDRSALVRFG | APLDRAAMVRFG | APFDRSSMVRFG |
| <i>B. xylophilus</i> FLP-7   | APMDRASMVRFG | APMDRASMVRFG | APMDRASMVRFG | APMDRASMVRFG |
| Consensus                    | APMDRSSMVRFG | APMDRSAMVRFG | APMDRSSMVRFG | APMDRSSMVRFG |
| <i>A. suum</i> FLP-7         | -----        | -----        | -----        | -----        |
| <i>A. caninum</i> FLP-7      | -----        | -----        | -----        | -----        |
| <i>N. brasiliensis</i> FLP-7 | -----        | -----        | -----        | -----        |
| <i>H. contortus</i> FLP-7    | RAPEAHPLIRFG | -----        | -----        | -----        |
| <i>C. elegans</i> FLP-7      | SPMDRSKMVRFG | SSIDRASMVRLG | TPMQRSSMVRFG | -----        |
| <i>S. ratti</i> FLP-7        | -APLDRAMVRFG | -APLDRAMVRFG | APLDR-AMVRFG | -----        |
| <i>G. pallida</i> FLP-7      | -----        | -----        | -----        | -----        |
| <i>M. hapla</i> FLP-7        | -----        | -----        | -----        | -----        |
| <i>M. incognita</i> FLP-7    | -----        | -----        | -----        | -----        |
| <i>B. xylophilus</i> FLP-7   | -----        | -----        | -----        | -----        |
| Consensus                    | APD MVRFG    | A AMVR G     | PL R AMVRFG  |              |

## 8. FLP-8 sequelogues

|                              |                |          |          |          |          |
|------------------------------|----------------|----------|----------|----------|----------|
| <i>T. spiralis</i> FLP-8     | ATDKGGKALFVRFG | -----    | -----    | -----    | KNEFVRFG |
| <i>T. muris</i> FLP-8        | AHVLGGKALFVRFG | -----    | -----    | -----    | KNEFVRFG |
| <i>B. malayi</i> FLP-8       | -----KNEFIRFG  | -----    | -----    | -----    | KNEFIRFG |
| <i>W. bancrofti</i> FLP-8    | -----KNEFIRFG  | -----    | -----    | -----    | KNEFIRFG |
| <i>D. immitis</i> FLP-8      | -----KNEFIRFG  | -----    | -----    | -----    | -----    |
| <i>O. volvulus</i> FLP-8     | -----KNEFIRFG  | -----    | -----    | -----    | KNEFIRFG |
| <i>O. ochengi</i> FLP-8      | -----KNEFIRFG  | -----    | -----    | -----    | KNEFIRFG |
| <i>L. loa</i> FLP-8          | -----KNEFIRFG  | -----    | -----    | -----    | KNEFIRFG |
| <i>A. suum</i> FLP-8         | -----KNEFIRFG  | KNEFIRFG | KNEFIRFG | KNEFIRFG | KNEFIRFG |
| <i>N. brasiliensis</i> FLP-8 | -----KNEFIRFG  | -----    | KNEFIRFG | KNEFIRFG | KNEFIRFG |
| <i>H. contortus</i> FLP-8    | -----KNEFIRFG  | -----    | -----    | -----    | KNEFIRFG |
| <i>C. elegans</i> FLP-8      | -----KNEFIRFG  | -----    | KNEFIRFG | KNEFIRFG | KNEFIRFG |
| <i>S. ratti</i> FLP-8        | -----KNEFIRFG  | KNEFIRFK | -----    | -----    | KNEFIRFG |
| <i>B. xylophilus</i> FLP-8   | -----KNEFIRFG  | -----    | -----    | -----    | KNEFIRFG |
| Consensus                    | KNEFIRFG       | KNEFIRF  | KNEFIRFG | KNEFIRFG | KNEFIRFG |

**9. FLP-9 sequelogues**

|                              |          |          |
|------------------------------|----------|----------|
| <i>N. brasiliensis</i> FLP-9 | KPSFVRFG | KPSFVRFG |
| <i>A. caninum</i> FLP-9      | KPSFVRFG | KPSFVRFG |
| <i>H. contortus</i> FLP-9    | KPSFVRFG | KPSFVRFG |
| <i>C. elegans</i> FLP-9      | KPSFVRFG | KPSFVRFG |
| Consensus                    | KPSFVRFG | KPSFVRFG |

## 11. FLP-11 sequelogues

|                               |                        |                           |                          |
|-------------------------------|------------------------|---------------------------|--------------------------|
| <i>B. malayi</i> FLP-11       | AIRNALVRF <sup>D</sup> | --SGIRNALVRF <sup>G</sup> | -----                    |
| <i>W. bancrofti</i> FLP-11    | AIRNALVRF <sup>D</sup> | --SGIRNALVRF <sup>G</sup> | -----                    |
| <i>D. immitis</i> FLP-11      | AMRNALIRF <sup>G</sup> | --SGIRNALIRF <sup>G</sup> | -----                    |
| <i>O. ochengi</i> FLP-11      | AMRNALIRF <sup>G</sup> | --SGIRNALVRF <sup>G</sup> | -----                    |
| <i>O. volvulus</i> FLP-11     | AMRNALIRF <sup>G</sup> | --SGIRNALVRF <sup>G</sup> | -----                    |
| <i>L. loa</i> FLP-11          | AIRNALVRF <sup>G</sup> | --SGIRNALVRF <sup>G</sup> | -----                    |
| <i>A. suum</i> FLP-11         | AMRNALVRF <sup>G</sup> | --SGMRNALVRF <sup>G</sup> | -NGAPQPFVRF <sup>G</sup> |
| <i>A. caninum</i> FLP-11      | AMRNALVRF <sup>G</sup> | AGGGMRNALVRF <sup>G</sup> | -NGAPQPFVRF <sup>G</sup> |
| <i>N. brasiliensis</i> FLP-11 | AMRNALVRF <sup>G</sup> | AGGGMRNALVRF <sup>G</sup> | -NGAPQPFVRF <sup>G</sup> |
| <i>H. contortus</i> FLP-11    | AMRNALVRF <sup>G</sup> | AGGSMRNALVRF <sup>G</sup> | -NGAPQPFVRF <sup>G</sup> |
| <i>C. elegans</i> FLP-11      | AMRNALVRF <sup>G</sup> | ASGGMRNALVRF <sup>G</sup> | -NGAPQPFVRF <sup>G</sup> |
| <i>S. ratti</i> FLP-11        | AMRNALVRF <sup>G</sup> | --AGMRNALVRF <sup>G</sup> | -NAAPQPFVRF <sup>G</sup> |
| <i>B. xylophilus</i> FLP-11   | SMRNALVRF <sup>G</sup> | --SGMRNALVRF <sup>G</sup> | AQSAPEPFVRF <sup>G</sup> |
| <i>G. pallida</i> FLP-11      | -----                  | --STMRNALVRF <sup>G</sup> | --NPQPFVRF <sup>G</sup>  |
| <i>M. hapla</i> FLP-11        | TMRNALIRF <sup>G</sup> | -SATLRSAMVRF <sup>G</sup> | -TSAPQPFVRF <sup>G</sup> |
| <i>M. incognita</i> FLP-11    | TMRNALIRF <sup>G</sup> | -SATLRSAMVRF <sup>G</sup> | -NSAPQPFVRF <sup>G</sup> |
| Consensus                     | AMRNALVRF <sup>G</sup> | SGMRNALVRF <sup>G</sup>   | NGAPQPFVRF <sup>G</sup>  |

## 12. FLP-12 sequelogues

|                               |              |
|-------------------------------|--------------|
| <i>W. bancrofti</i> FLP-12    | -RNKFEFIRFG  |
| <i>D. immitis</i> FLP-12      | -RNKFEFIRFG  |
| <i>O. volvulus</i> FLP-12     | -RNKFEFIRFG  |
| <i>O. ochengi</i> FLP-12      | -RNKFEFIRFG  |
| <i>L. loa</i> FLP-12          | -RNKFEFIRFG  |
| <i>A. suum</i> FLP-12         | -RNKFEFIRFG  |
| <i>A. caninum</i> FLP-12      | -RNKFEFIRFG  |
| <i>N. brasiliensis</i> FLP-12 | -RNKFEFIRFG  |
| <i>H. contortus</i> FLP-12    | -RNKFEFIRFG  |
| <i>C. elegans</i> FLP-12      | -RNKFEFIRFG  |
| <i>S. ratti</i> FLP-12        | -RNKFEFIRFG  |
| <i>B. xylophilus</i> FLP-12   | -RNKFEFIRFG  |
| <i>G. pallida</i> FLP-12      | -KNKFEFIRFG  |
| <i>M. hapla</i> FLP-12        | KNRNKFEFIRFG |
| <i>M. incognita</i> FLP-12    | KNRNKFEFIRFG |
| Consensus                     | RNKFEFIRFG   |

### 13. FLP-13 sequelogues

|                               |                |              |                |             |             |
|-------------------------------|----------------|--------------|----------------|-------------|-------------|
| <i>W. bancrofti</i> FLP-13    | -----          | -----        | NDAFQTSPLIRFG  | -----       |             |
| <i>D. immitis</i> FLP-13      | -----          | -----        | NEAFQTSPLIRFG  | -----       |             |
| <i>O. volvulus</i> FLP-13     | -----          | -----        | TEAFQTSPLIRFG  | -----       |             |
| <i>O. ochengi</i> FLP-13      | -----          | -----        | TEAFQTSPLIRFG  | -----       |             |
| <i>L. loa</i> FLP-13          | -----          | -----        | --AFQTSPLIRFG  | -----       |             |
| <i>A. suum</i> FLP-13         | --DSKLMDFLIRFG | -----        | -AEGLSSPLIRFG  | -----       |             |
| <i>A. caninum</i> FLP-13      | -----          | -----        | -----          | -----       |             |
| <i>N. brasiliensis</i> FLP-13 | DSFDESGSPLMGFG | -DPCGAPLIRFG | --APEAQPLIRFG  | TPEGAPLIRFG |             |
| <i>H. contortus</i> FLP-13    | -SFEENASPLIRFG | DLSCGAPLIRFG | --APEAHP LIRFG | APDSAPLIRFG |             |
| <i>C. elegans</i> FLP-13      | ----AMDSPLIRFG | AADGAPLIRFG  | --APEASPFIRFG  | AADGAPLIRFG |             |
| <i>S. ratti</i> FLP-13        | ----SSPLVRFG   | -----        | -ASMIDSPVRFG   | -SPSCPLVRFG |             |
| <i>B. xylophilus</i> FLP-13   | ----AYAGPLIRFG | -----        | -NSPITDPLIRFG  | -----       |             |
| <i>B. xylophilus</i> FLP-13.2 | -----          | -----        | -----          | -----       |             |
| <i>G. pallida</i> FLP-13      | -----          | TPSVEPIIRFG  | -----          | -----       |             |
| <i>M. hapla</i> FLP-13        | -----          | -APTAPIIRFG  | -----          | -----       |             |
| <i>M. incognita</i> FLP-13    | -----          | -APTAPIIRFG  | -----          | -----       |             |
| Consensus                     | ASPLIRFG       | APGAPIIRFG   | A TSPLIRFG     | APDSAPLIRFG |             |
| <i>W. bancrofti</i> FLP-13    | -----          | -----        | -----          | -----       | -----       |
| <i>D. immitis</i> FLP-13      | -----          | -----        | -----          | -----       | -----       |
| <i>O. volvulus</i> FLP-13     | -----          | -----        | -----          | -----       | -----       |
| <i>O. ochengi</i> FLP-13      | -----          | -----        | -----          | -----       | -----       |
| <i>L. loa</i> FLP-13          | -----          | -----        | -----          | -----       | -----       |
| <i>A. suum</i> FLP-13         | -----          | -----        | IVTDETVLIRFG   | -----       | -----       |
| <i>A. caninum</i> FLP-13      | SYDETAGPLIRFG  | -DMEGAPLIRFG | -----          | -----       | -----       |
| <i>N. brasiliensis</i> FLP-13 | --DAEASPLIRFG  | ----SAPLIRFG | --SAAPLVRFG    | SPEAAPLIRFG | SPEASPLIRFG |
| <i>H. contortus</i> FLP-13    | --DPEASPLIRFG  | --SPAAPLIRFG | SPNASPLIRFG    | -----       | -----       |
| <i>C. elegans</i> FLP-13      | --APEASPFIRFG  | -ASPAPLIRFG  | SPSAVPLIRFG    | -SAAAPLIRFG | -ASAPLIRFG  |
| <i>S. ratti</i> FLP-13        | ---SPAVPLVRFG  | --SLSCPLVRFG | -SGMSPLIRFG    | -ASAGPLVRFG | -----       |
| <i>B. xylophilus</i> FLP-13   | ---PDHSPLIRFG  | AAFRSAPHIRFG | -----          | -----       | -----       |
| <i>B. xylophilus</i> FLP-13.2 | -----          | -----        | ---SNPLIRFG    | ---SPLVRFG  | -----       |
| <i>G. pallida</i> FLP-13      | ---STVVPLIRFG  | PAERAAPLIRFG | TANAVPLIRFG    | -----       | -----       |
| <i>M. hapla</i> FLP-13        | -----          | -SFNSAPLIRFG | -LNNAPLIRFG    | -----       | -----       |
| <i>M. incognita</i> FLP-13    | -----          | -SPNSAPLIRFG | -LNNAPLIRFG    | -----       | -----       |
| Consensus                     | EASPLIRFG      | A SAPLIRFG   | AAPLIRFG       | AAAAPLVRFG  | AAPLIRFG    |

## 14. FLP-14 sequelogues

|                               |          |          |              |          |
|-------------------------------|----------|----------|--------------|----------|
| <i>T. spirallis</i> FLP-14    | -----    | KHEYLRFG | KHDYLRFG---  | -----    |
| <i>T. muris</i> FLP-14        | KHEYLRFG | KHEYLRFG | KHEYLRFG---  | -----    |
| <i>B. malayi</i> FLP-14       | KHEYLRFG | KHEYLRFG | KHEYLRFG---  | -----    |
| <i>W. bancrofti</i> FLP-14    | KHEYLRFG | KHEYLRFG | KHEYLRFG---  | -----    |
| <i>D. immitis</i> FLP-14      | KHEYLRFG | KHEYLRFG | KHEYLRFG---  | -----    |
| <i>O. volvulus</i> FLP-14     | KHEYLRFG | KHEYLRFG | KHEYLRFG---  | -----    |
| <i>O. ochengi</i> FLP-14      | KHEYLRFG | KHEYLRFG | KHEYLRFG---  | -----    |
| <i>L. loa</i> FLP-14          | KHEYLRFG | KHEYLRFG | KHEYLRFG---  | -----    |
| <i>A. suum</i> FLP-14         | KHEYLRFG | KHEYLRFG | KHEYLRFG---  | -----    |
| <i>A. caninum</i> FLP-14      | KHEYLRFG | KHEYLRFG | KHEYLRFG---  | KHEYLRFG |
| <i>N. brasiliensis</i> FLP-14 | KHEYLRFG | KHEYLRFG | KHEYLRFG---  | KHEYLRFG |
| <i>H. contortus</i> FLP-14    | KHEYLRFG | KHEYLRFG | KHEYLRF SRFG | KHEYLRFG |
| <i>C. elegans</i> FLP-14      | KHEYLRFG | KHEYLRFG | KHEYLRFG---  | KHEYLRFG |
| <i>S. ratti</i> FLP-14        | KHEYLRFG | KHEYLRFG | KHEYLRFG---  | -----    |
| <i>B. xylophilus</i> FLP-14   | -----    | KHEYLRFG | KHEYLRFG---  | -----    |
| <i>G. pallida</i> FLP-14      | -----    | KHEYLRFG | KHEYLRFG---  | -----    |
| <i>M. hapla</i> FLP-14        | -----    | KHEYLRFG | KHEFVRFG---  | -----    |
| <i>M. incognita</i> FLP-14    | -----    | KHEYLRFG | KHEFVRFG---  | -----    |
| Consensus                     | KHEYLRFG | KHEYLRFG | KHEYLRFG     | KHEYLRFG |

### 15. FLP-15 sequelogues

|                               |            |             |
|-------------------------------|------------|-------------|
| <i>A. suum</i> FLP-15         | GRPRGPLRFG | -----       |
| <i>N. brasiliensis</i> FLP-15 | AGPQGPLRFG | RGGPSGPLRFG |
| <i>H. contortus</i> FLP-15    | AGPQGPLRFG | -RGPSGPLRFG |
| <i>C. elegans</i> FLP-15      | GGPQGPLRFG | -RGPSGPLRFG |
| Consensus                     | AGPQGPLRFG | RGPSGPLRFG  |



## 16. FLP-16 sequelogues

|                               |          |          |          |
|-------------------------------|----------|----------|----------|
| <i>B. malayi</i> FLP-16       | -----    | GQTFVRFG | -----    |
| <i>W. bancrofti</i> FLP-16    | -----    | GQTFVRFG | -----    |
| <i>D. immitis</i> FLP-16      | -----    | GQTFVRFG | -----    |
| <i>O. volvulus</i> FLP-16     | -----    | GQTFVRFG | -----    |
| <i>O. ochengi</i> FLP-16      | -----    | GQTFVRFG | -----    |
| <i>L. loa</i> FLP-16          | -----    | GQTFVRFG | -----    |
| <i>A. suum</i> FLP-16         | -----    | AQTFVRFG | AQTFVRFG |
| <i>A. caninum</i> FLP-16      | AQTFVRFG | AQTFVRFG | AQTFVRFG |
| <i>N. brasiliensis</i> FLP-16 | AQTFVRFG | AQTFVRFG | AQTFVRFG |
| <i>H. contortus</i> FLP-16    | AQTFVRFG | AQTFVRFG | GQTFVRFG |
| <i>C. elegans</i> FLP-16      | AQTFVRFG | AQTFVRFG | AQTFVRFG |
| <i>S. ratti</i> FLP-16        | AQTFVRFG | AQTFVRFG | AQTFVRFG |
| <i>B. xylophilus</i> FLP-16   | AQTFVRFG | AQTFVRFG | AQTFVRLG |
| <i>G. pallida</i> FLP-16      | AQTFVRFG | AQTFVRFG | GQTFVRFG |
| <i>M. hapla</i> FLP-16        | AQTFVRFG | AQTFVRFG | GQTFVRFG |
| <i>M. incognita</i> FLP-16    | AQTFVRFG | AQTFVRFG | AQTFVRFG |
| Consensus                     | AQTFVRFG | AQTFVRFG | AQTFVRFG |

### 17. FLP-17 sequelogues

|                               |          |          |          |
|-------------------------------|----------|----------|----------|
| <i>A. suum</i> FLP-17         | KSAFVRFG | KSAFVRFG | KSSYIRFG |
| <i>A. caninum</i> FLP-17      | KSAFVRFG | KSAFVRFG | KSQYIRFG |
| <i>H. contortus</i> FLP-17    | KSAFVRFG | KSAFVRFG | KSQYIRFG |
| <i>N. brasiliensis</i> FLP-17 | KSAFVRFG | KSAFVRFG | KSQYIRFG |
| <i>C. elegans</i> FLP-17      | KSAFVRFG | KSAFVRFG | KSQYIRFG |
| <i>S. ratti</i> FLP-17        | KSAFVRFG | KSAFVRFG | KSSYIRFG |
| <i>B. xylophilus</i> FLP-17   | KSAFVRFG | -----    | KSSYIRFG |
| Consensus                     | KSAFVRFG | KSAFVRFG | KSQYIRFG |

## 18. FLP-18 sequelogues

|                               |                  |                  |               |             |
|-------------------------------|------------------|------------------|---------------|-------------|
| <i>T. spiralis</i> FLP-18     | -----            | -----            | -----         | -YDAPGLMRFG |
| <i>T. muris</i> FLP-18        | -----            | -----            | -----         | ----PGLMRFG |
| <i>W. bancrofti</i> FLP-18    | SQLIDYGDIPGVLRFG | -----            | ---DVPG-VLRFG | EGDIPGVLRFG |
| <i>D. immitis</i> FLP-18      | -----LFRFG       | -----            | ---DVPG-VLRFG | EGDIPGVLRFG |
| <i>O. volvulus</i> FLP-18     | -----DLFRFG      | -----            | ---AVPG-VLRFG | --EIPGVLRFG |
| <i>O. ochengi</i> FLP-18      | -----DLFRFG      | -----            | ---AVPGGVLRFG | --EIPGVLRFG |
| <i>L. loa</i> FLP-18          | ----DYGDIPGVLRFG | -----            | ---DIPG-VLRFG | EGDIPGVLRFG |
| <i>A. suum</i> FLP-18         | -GFGDEMSMPGVLRFG | GMMPGVLRFG       | ---AVPG-VLRFG | -GDVPGVLRFG |
| <i>A. caninum</i> FLP-18      | ---DFDNGMPGVLRFG | EVPGVFRFG        | ---SVPG-VLRFG | --SVPGVLRFG |
| <i>N. brasiliensis</i> FLP-18 | ---DPEGGMPGVLRFG | EVPGVLRFG        | ---SMPG-VLRFG | --GVPGVLRFG |
| <i>H. contortus</i> FLP-18    | ---XLVGGMPGVLRFG | EVPGVLRFG        | ---CMPG-VLRFG | --SVPGVLRFG |
| <i>C. elegans</i> FLP-18      | -----EMPGLRFG    | SVPGVLRFG        | ---SVPG-VLRFG | --EIPGVLRFG |
| <i>S. ratti</i> FLP-18        | -----EMPGLRFG    | AVPGVLRFG        | ---GVPG-LRFG  | -DMPGLLRFG  |
| <i>B. xylophilus</i> FLP-18   | ----DDQAMPGLRFG  | EMPGLRFG         | ---AVPG-VLRFG | -SDMPGLRFG  |
| <i>G. pallida</i> FLP-18      | -----            | -----            | DEFVAPG-VLRFG | ---MPGLRFG  |
| <i>M. hapla</i> FLP-18        | -----            | -----            | DDFIAPG-VLRFG | ---MPGLRFG  |
| <i>M. incognita</i> FLP-18    | -----            | -----            | DDFIAPG-VLRFG | ---MPGLRFG  |
| Consensus                     | MPGVLRFG         | EVPGVLRFG        | VPG VLRFG     | DIPGVLRFG   |
| <i>T. spiralis</i> FLP-18     | -----            | ---YDDSAAPGLMRFG | -----         | -----       |
| <i>T. muris</i> FLP-18        | -----            | -----            | -----         | -----       |
| <i>W. bancrofti</i> FLP-18    | -NDIIPGVLRFG     | -----            | -----         | -----       |
| <i>D. immitis</i> FLP-18      | -NDIIPGVLRFG     | ---SVPGLRFG      | -----         | -----       |
| <i>O. volvulus</i> FLP-18     | -SEDPGVLRFG      | ---SEPGVLRFG     | -----         | -----       |
| <i>O. ochengi</i> FLP-18      | -SEDPGVLRFG      | ---SEPGVLRFG     | -----         | -----       |
| <i>L. loa</i> FLP-18          | -NDIIPGVLRFG     | ---SVPGLRFG      | -----         | -----       |
| <i>A. suum</i> FLP-18         | --SDMPGLRFG      | ---SMPGLRFG      | -----         | -----       |
| <i>A. caninum</i> FLP-18      | ---EMPGLRFG      | ---STPGVLRFG     | HDIIPGVMRFG   | -NVPGLRFG   |
| <i>N. brasiliensis</i> FLP-18 | ---EMPGLRFG      | ---AVPGVLRFG     | HEIIPGVMRFG   | -NVPGLRFG   |
| <i>H. contortus</i> FLP-18    | ---EMPGLRFG      | ---AMPGLRFG      | TEIIPGLMRFG   | -NVPGLRF-   |
| <i>C. elegans</i> FLP-18      | -----            | ---SEVPGLRFG     | -DVPGLRFG     | -SVPGLRFG   |
| <i>S. ratti</i> FLP-18        | --DQIPGLLRFG     | ---GDMPGVLRFG    | EQIIPGLLRFG   | -DMPGLLRFG  |
| <i>B. xylophilus</i> FLP-18   | DGAEMPGLRFG      | ---SEMPGLRFG     | SDMPGLRFG     | GDMPGVLRFG  |
| <i>G. pallida</i> FLP-18      | ---AVPGVLRFG     | ---AEVPGVLRFG    | --MPQVLRFG    | -----       |
| <i>M. hapla</i> FLP-18        | ---AVPGVLRFG     | QAQESGAVPGVLRFG  | --MPQVLRFG    | -----       |
| <i>M. incognita</i> FLP-18    | ---AVPGVLRFG     | QSQESGAVPGVLRFG  | --MPQVLRFG    | -----       |
| Consensus                     | DMPGLRFG         | SVPGLRFG         | DIPGLRFG      | NVPGLRFG    |

## 19. FLP-19 sequelogues

|                               |             |             |
|-------------------------------|-------------|-------------|
| <i>B. malayi</i> FLP-19       | ---WASQLRFG | -ANWASKVRFG |
| <i>W. bancrofti</i> FLP-19    | ---WASQLRFG | -TNWASKVRFG |
| <i>D. imitidis</i> FLP-19     | ---WASQLRFG | -ANWASKVRFG |
| <i>O. volvulus</i> FLP-19     | ---WASQLRFG | -VNWASKVRFG |
| <i>O. ochengi</i> FLP-19      | ---WASQLRFG | -VNWASKVRFG |
| <i>L. loa</i> FLP-19          | ---WASQLRLG | -ANWASKVRFG |
| <i>A. suum</i> FLP-19         | ---WASQLRLG | -ASWASKVRFG |
| <i>A. caninum</i> FLP-19      | AETMGGQVRFG | -ASWASSVRFG |
| <i>H. contortus</i> FLP-19    | ---WANQVRFG | ASSWASSIRFG |
| <i>N. brasiliensis</i> FLP-19 | ---WANQVRFG | ASSWASSVRFG |
| <i>C. elegans</i> FLP-19      | ---WANQVRFG | -ASWASSVRFG |
| <i>S. ratti</i> FLP-19        | ---WASQLRYG | -SSWASQLRYG |
| <i>B. xylophilus</i> FLP-19   | ---WASSLRFG | GPGWASQVRFG |
| <i>G. pallida</i> FLP-19      | ---WATQLRFG | --QWASQVRFG |
| <i>M. hapla</i> FLP-19        | ---WSTQLRYG | -SPWSSQVR-- |
| <i>M. incognita</i> FLP-19    | ---WSTQLRYG | -SPWSSQVRFG |
| Consensus                     | WASQLRFG    | A WAS VRFG  |

## 20. FLP-20 sequelogues

|                               |        |        |        |        |
|-------------------------------|--------|--------|--------|--------|
| <i>A. suum</i> FLP-20         | AVLRLG | SLMRLG | GIMRLG | APMRLG |
| <i>A. caninum</i> FLP-20      | AMMRLG | -----  | AMMRLG | -----  |
| <i>N. brasiliensis</i> FLP-20 | AMMRLG | -----  | AIMRLG | -----  |
| <i>H. contortus</i> FLP-20    | AMMRLG | -----  | AIMRLG | -----  |
| <i>C. elegans</i> FLP-20      | -----  | AMMRFG | AMMRFG | SVFRLG |
| <i>S. ratti</i> FLP-20        | -----  | ALVRLG | AYVRLG | -----  |
| <i>B. xylophilus</i> FLP-20   | -----  | AYMRLG | AYMRLG | -----  |
| <i>G. pallida</i> FLP-20      | -----  | -----  | ALMRLG | -----  |
| <i>M. hapla</i> FLP-20        | -----  | AIMRLG | ALMRLG | -----  |
| <i>M. incognita</i> FLP-20    | -----  | AIMRLG | ALMRLG | -----  |
| Consensus                     | AMMRLG | AIMRLG | AIMRLG | A RLG  |

## 21. FLP-21 sequelogues

|                               |             |
|-------------------------------|-------------|
| <i>B. malayi</i> FLP-21       | -ALGPRPLRFG |
| <i>W. bancrofti</i> FLP-21    | -ALGPRPLRFG |
| <i>D. immitis</i> FLP-21      | -ARGPRPLRFG |
| <i>O. volvulus</i> FLP-21     | -APGPRPLRFG |
| <i>O. ochengi</i> FLP-21      | -APGPRPLRFG |
| <i>L. loa</i> FLP-21          | -ALGPRPLRFG |
| <i>A. suum</i> FLP-21         | -GLGPRPLRFG |
| <i>A. caninum</i> FLP-21      | -GLGPRPLRFG |
| <i>N. brasiliensis</i> FLP-21 | -GLGPRPLRFG |
| <i>H. contortus</i> FLP-21    | -GLGPRPLRFG |
| <i>C. elegans</i> FLP-21      | -GLGPRPLRFG |
| <i>S. ratti</i> FLP-21        | -AVGPRPLRFG |
| <i>B. xylophilus</i> FLP-21   | -GMGPRPLRFG |
| <i>G. pallida</i> FLP-21      | GSLGPRPLRFG |
| <i>M. hapla</i> FLP-21        | GSLGPRPLRFG |
| <i>M. incognita</i> FLP-21    | GSLGPRPLRFG |
| Consensus                     | ALGPRPLRFG  |

## 22. FLP-22 sequelogues

|                               |                |             |              |
|-------------------------------|----------------|-------------|--------------|
| <i>B. malayi</i> FLP-22       | ---VPNAKWMRFG  | -LPNAKWMRFG | -AQTAKWMRFG  |
| <i>W. bancrofti</i> FLP-22    | TLNVVNAKWMRFG  | -LPNAKWMRFG | -AQTAKWMRFG  |
| <i>D. immitis</i> FLP-22      | ---TPNLIKWMRFG | -LPNTKWMRFG | -VPTAKWMRFG  |
| <i>O. volvulus</i> FLP-22     | ---TVNTKWMRFG  | -LPNTKWMRFG | -AQITTKWMRFG |
| <i>O. ochengi</i> FLP-22      | ---TVNTKWMRFG  | -LPNTKWMRFG | -AQITTKWMRFG |
| <i>L. loa</i> FLP-22          | ---TGNVKWMRLG  | -----       | -AQNVKWMKFG  |
| <i>A. suum</i> FLP-22         | ---ASNMKWMRFG  | -SPNVKWMRFG | -APNMKWMRFG  |
| <i>A. caninum</i> FLP-22      | ---TPSAKWMRFG  | -SPNAKWMRFG | -SPEAKWMRFG  |
| <i>N. brasiliensis</i> FLP-22 | ---TPSAKWMRFG  | -SPNAKWMRFG | -TPDAKWMRFG  |
| <i>H. contortus</i> FLP-22    | ---TPSAKWMRFG  | -SPNAKWMRFG | -TPDAKWMRFG  |
| <i>C. elegans</i> FLP-22      | ---SPSAKWMRFG  | -SPSAKWMRFG | -SPSAKWMRFG  |
| <i>S. ratti</i> FLP-22        | ---APNVKWMRFG  | -----       | -SPQVKWMRFG  |
| <i>B. xylophilus</i> FLP-22   | ---APAMKWMRFG  | -SPQKWMRFG  | APQ-GKWMRFG  |
| <i>G. pallida</i> FLP-22      | -QPAGGVKWMRFG  | -----       | TPQ-GKWMRFG  |
| <i>M. hapla</i> FLP-22        | ---ENGVKWMRFG  | VPQSKWMRFG  | APSSGKWMRFG  |
| <i>M. incognita</i> FLP-22    | ---ENGVKWMRFG  | VPQSKWMRFG  | APSSGKWMRFG  |
| Consensus                     | TPNVKWMRFG     | PNAKWMRFG   | A TAKWMRFG   |

**23. FLP-23 sequelogues**

|                            |               |
|----------------------------|---------------|
| <i>W. bancrofti</i> FLP-23 | -----QDFLRFG  |
| <i>D. immitis</i> FLP-23   | -----VQNFLRFG |
| <i>O. volvulus</i> FLP-23  | -----VQNFLRFG |
| <i>O. ochengi</i> FLP-23   | -----KQDFLRFG |
| <i>C. elegans</i> FLP-23   | --VVGQDFLRFG  |
| <i>H. contortus</i> FLP-23 | -----LQDFLRFG |
| Consensus                  | MQDFLRFG      |



## 24. FLP-24 sequelogues

|                            |              |
|----------------------------|--------------|
| <i>B. malayi</i> FLP-24    | VNPADMMIRFG  |
| <i>W. bancrofti</i> FLP-24 | VNPADMMIRFG  |
| <i>D. immitis</i> FLP-24   | VSPADMMIRFG  |
| <i>O. volvulus</i> FLP-24  | VPSAADMMIRFG |
| <i>O. ochengi</i> FLP-24   | VPSAADMMIRFG |
| <i>L. loa</i> FLP-24       | VPSAADMMIRFG |
| <i>A. suum</i> FLP-24      | VPSAADMMIRFG |
| <i>A. caninum</i> FLP-24   | VPSAGDMMVRFG |
| <i>H. contortus</i> FLP-24 | VPSAGDMMVRFG |
| <i>C. elegans</i> FLP-24   | VPSAGDMMVRFG |
| <i>S. ratti</i> FLP-24     | APNKADMMIRFG |
| Consensus                  | VPSAADMMIRFG |

## 25. FLP-25 sequelogues

|                               |                                |                               |
|-------------------------------|--------------------------------|-------------------------------|
| <i>B. malayi</i> FLP-25       | -----TN <del>YDF</del> IRFG    | ---KDGPG <del>T</del> YDYIRFG |
| <i>W. bancrofti</i> FLP-25    | -----TN <del>YDF</del> IRFG    | ----DGPE <del>T</del> YDYIRFG |
| <i>D. immitis</i> FLP-25      | -----VPN <del>YDFV</del> RFG   | -----NDPA <del>YDF</del> IRFG |
| <i>O. volvulus</i> FLP-25     | -----TRD <del>YDF</del> IRFG   | ---SGQDNK <del>YDY</del> IRFG |
| <i>O. ochengi</i> FLP-25      | -----TRD <del>YDF</del> IRFG   | ---SGQDNE <del>YDY</del> IRFG |
| <i>L. loa</i> FLP-25          | -----TN <del>YDF</del> IRFG    | -----PA <del>T</del> YDYIRFG  |
| <i>A. suum</i> FLP-25         | -----AD <del>YDF</del> IRFG    | ----KGDN <del>S</del> YDYIRFG |
| <i>A. caninum</i> FLP-25      | -----N <del>YDFV</del> RFG     | -----A <del>S</del> YDYIRFG   |
| <i>N. brasiliensis</i> FLP-25 | -----H <del>YDFV</del> RFG     | -----AA <del>S</del> YDYIRFG  |
| <i>H. contortus</i> FLP-25    | -----H <del>YDFV</del> RFG     | -----A <del>S</del> YDYIRFG   |
| <i>C. elegans</i> FLP-25      | -----D <del>YDFV</del> RFG     | -----A <del>S</del> YDYIRFG   |
| <i>S. ratti</i> FLP-25        | SESQIPEGFS <del>YDFV</del> RFG | --GVTESNN <del>YDFV</del> RFG |
| <i>G. pallida</i> FLP-25      | -----A <del>YDY</del> IRFG     | NSEHSAGS <del>T</del> YDYIRFG |
| <i>M. incognita</i> FLP-25    | -----SS-SS <del>YDFV</del> RFG | -SNGNNGN <del>T</del> YDYIRFG |
| <i>M. hapla</i> FLP-25        | -----SSPSS <del>YDFV</del> RFG | -SNGNNGN <del>T</del> YDYIRFG |
| Consensus                     | YDFVRFG                        | TYDYIRFG                      |

## 26. FLP-26 sequelogues

|                          |              |                 |                     |
|--------------------------|--------------|-----------------|---------------------|
| <i>A. suum</i> FLP-26    | RIDINDLALRFG | SSYSFDPSNINLRFG | -----TFVIPTDLALRFG  |
| <i>A. caninum</i> FLP-26 | -----        | ---EFNADDLTLRFG | ---GGEIAFHPNDLALRFG |
| <i>C. elegans</i> FLP-26 | -----        | ---EFNADDLTLRFG | GGAGEPLAFSPDMLSLRFG |
| Consensus                |              | EFNADDLTLRFG    | G IAF P DLALRFG     |

## 27. FLP-27 sequelogues

|                             |           |
|-----------------------------|-----------|
| <i>A. caninum</i> FLP-27    | TMGGRMRFG |
| <i>C. elegans</i> FLP-27    | GLGGRMRFG |
| <i>B. xylophilus</i> FLP-27 | FKGGRMRFG |
| <i>G. pallida</i> FLP-27    | SKGSRMRFG |
| <i>M. hapla</i> FLP-27      | AKGSRMRFG |
| <i>M. incognita</i> FLP-27  | AKGSRMRFG |
| Consensus                   | AKGSRMRFG |

**28. FLP-28 sequelogues**

|                                  |       |        |
|----------------------------------|-------|--------|
| <i>A. suum</i> FLP-28/29         | ----- | ILMRFG |
| <i>A. caninum</i> FLP-28/29      | ----- | ILMRFG |
| <i>N. brasiliensis</i> FLP-28/29 | ----- | ILMRFG |
| <i>H. contortus</i> FLP-28/29    | ----- | IFMRFG |
| <i>C. elegans</i> FLP-28/29      | ----- | VMRFG  |
| <i>S. ratti</i> FLP-28/29        | ----- | VMMRFG |
| Consensus                        |       | ILMRFG |

### 31. FLP-31 sequelogues

|                             |             |
|-----------------------------|-------------|
| <i>B. xylophilus</i> FLP-31 | -GRPRGPPRFG |
| <i>G. pallida</i> FLP-31    | LYRPRGPPRFG |
| <i>M. hapla</i> FLP-31      | LYRPRGPPRFG |
| <i>M. incognita</i> FLP-31  | LYRPRGPPRFG |
| Consensus                   | LYRPRGPPRFG |

### 32. FLP-32 sequelogues

|                               |            |
|-------------------------------|------------|
| <i>A. caninum</i> FLP-32      | AMRNSLVRFG |
| <i>N. brasiliensis</i> FLP-32 | AMRNSLVRFG |
| <i>C. elegans</i> FLP-32      | AMRNSLVRFG |
| <i>S. ratti</i> FLP-32        | AMRNSLIRFG |
| <i>B. xylophilus</i> FLP-32   | AMRNSLVRFG |
| <i>G. pallida</i> FLP-32      | AMRNSLVRFG |
| <i>M. hapla</i> FLP-32        | AMRNSLVRFG |
| <i>M. incognita</i> FLP-32    | AMRNSLVRFG |
| Consensus                     | AMRNSLVRFG |

### 33. FLP-33 sequelogues

|                               |             |
|-------------------------------|-------------|
| <i>A. suum</i> FLP-33         | SIDGIQKPRFG |
| <i>A. caninum</i> FLP-33      | SIDGIQKPRFG |
| <i>N. brasiliensis</i> FLP-33 | SIDGIQKPRFG |
| <i>H. contortus</i> FLP-33    | SIDEIQKPR-- |
| <i>C. elegans</i> FLP-33      | TIDGIQKPRFG |
| Consensus                     | SIDGIQKPRFG |



### 34. FLP-34 sequelogues

|                               |                         |                             |
|-------------------------------|-------------------------|-----------------------------|
| <i>B. malayi</i> FLP-34       | -----VASAINGALRLRYG     | -----                       |
| <i>W. bancrofti</i> FLP-34    | ---DLEQFASAINGALRLRYG   | -----                       |
| <i>D. immitis</i> FLP-34      | ---DLGQFTSAINGALRLRYG   | -----QAVIDALVKAINAEPLRYG    |
| <i>O. volvulus</i> FLP-34     | ---DLEQFTSAINGALRLRYG   | -----QLPVADRVIASLNGAERLRFG  |
| <i>O. ochengi</i> FLP-34      | ---DLEQFTSAINGALRLRYG   | -----QLPLADRVIASLNGAERLR--  |
| <i>L. loa</i> FLP-34          | ---ALEQIASAINGALRLRYG   | -----                       |
| <i>A. suum</i> FLP-34         | SAHDLEGFASALNSASRLRYG   | -----                       |
| <i>A. caninum</i> FLP-34      | --SDMSEFTSAINGASRLRYG   | -----APLTNKLIQSLNGAERLRFG   |
| <i>N. brasiliensis</i> FLP-34 | --SDMSEFASAINGASRLRYG   | -----APLTNKLIESLNGAERLRFG   |
| <i>H. contortus</i> FLP-34    | --SDLSDFASAINNAGRLRYG   | -----APLTSKLIQSLNEAERLRFG   |
| <i>C. elegans</i> FLP-34      | --ADLSTFASAINNAGRLRYG   | -----ALNRDSLVAASLNNAAERLRFG |
| <i>B. xylophilus</i> FLP-34   | --SNLNEFMSAMKGAAPRLRYG  | ----MAAQNLPELIDTLNGAERLR--  |
| <i>G. pallida</i> FLP-34      | -SDGLSDFVGSILINGAARLRYG | -ASNYAEALPAGLLDQLNGAERLRFG  |
| <i>M. hapla</i> FLP-34        | --ADVRFIFGSLNGASRLRYG   | ASNNYAQALPAGLLDQLNGAERLRFG  |
| <i>M. incognita</i> FLP-34    | --ADVRFIFGSINSASRLRYG   | APSSYAEALPAGLLDQLNGAERLRFG  |
| Consensus                     | DL F SAINGA RLRYG       | L LI SLNGAERLRFG            |
