# Supplementary material for: New insights into the FLPergic complements of parasitic nematodes: Informing deorphanisation approaches
Source: PubMed Central journal article supplement (PMC4405611; doi:10.1016/j.euprot.2014.04.002), 2014-04-19
Supplement: mmc3.pdf [file mmc3.pdf]

*A. caninum* NPR-1 VGGIQAI<sup>I</sup>GLFIGT<sup>F</sup>SLCAIA<sup>I</sup>DRY<sup>F</sup>RLV<sup>I</sup>APGSP<sup>L</sup>LRK<sup>V</sup>NAIR<sup>I</sup>ITILL<sup>W</sup>I<sup>I</sup>SI<sup>L</sup>ATLPY<sup>V</sup>VYHMK<sup>K</sup>KKYP<sup>A</sup>IN<sup>-</sup>VCGE<sup>F</sup>CTEK<sup>W</sup>PNVH<sup>S</sup>KR<sup>L</sup>IY<sup>T</sup>LF<sup>V</sup>LAI<sup>Q</sup>F  
*H. contortus* NPR-1 VGGIQAI<sup>I</sup>GLFIGT<sup>F</sup>SLCAIA<sup>I</sup>DRY<sup>F</sup>RLV<sup>I</sup>APGSP<sup>L</sup>LRK<sup>V</sup>NAIR<sup>I</sup>ITILL<sup>W</sup>I<sup>I</sup>SI<sup>L</sup>ATLPY<sup>V</sup>VYHMK<sup>K</sup>KKYP<sup>T</sup>ISD<sup>-</sup>VCGE<sup>F</sup>CTEK<sup>W</sup>PNVH<sup>S</sup>KR<sup>L</sup>IY<sup>T</sup>LF<sup>V</sup>LAI<sup>Q</sup>F  
*C. elegans* NPR-1 IFCIQGIS<sup>I</sup>IFV<sup>C</sup>TFSL<sup>G</sup>AIAL<sup>D</sup>RYIL<sup>V</sup>VR<sup>P</sup>HSTP<sup>L</sup>LSQ<sup>R</sup>GAF<sup>L</sup>TLV<sup>L</sup>LL<sup>I</sup>LS<sup>F</sup>V<sup>T</sup>LPYAF<sup>N</sup>MQ<sup>I</sup>EY<sup>T</sup>EE<sup>-</sup>R<sup>I</sup>CGY<sup>F</sup>CTEK<sup>W</sup>ESAK<sup>S</sup>RR<sup>A</sup>YT<sup>M</sup>I<sup>V</sup>ML<sup>A</sup>Q<sup>F</sup>  
*N. brasiliensis* NPR-1 VGGIQAI<sup>I</sup>GLFIGT<sup>F</sup>SLCAIA<sup>I</sup>DRY<sup>F</sup>RLV<sup>I</sup>APGSP<sup>L</sup>LRK<sup>V</sup>NAIR<sup>I</sup>ITILL<sup>W</sup>I<sup>I</sup>SI<sup>L</sup>ATLPY<sup>V</sup>VYHMK<sup>K</sup>RRK<sup>Y</sup>PSIN<sup>-</sup>VCGE<sup>F</sup>CTEK<sup>W</sup>PNVH<sup>S</sup>KR<sup>L</sup>IY<sup>T</sup>LF<sup>V</sup>LAI<sup>Q</sup>F  
*S. ratti* NPR-1.1 IALIQG<sup>V</sup>SI<sup>I</sup>Y<sup>I</sup>CTF<sup>S</sup>LGAIA<sup>V</sup>DRY<sup>I</sup>LV<sup>K</sup>PHS<sup>A</sup>LSR<sup>K</sup>GGALV<sup>T</sup>GIL<sup>W</sup>TL<sup>S</sup>L<sup>I</sup>FN<sup>I</sup>IPY<sup>V</sup>LFMY<sup>I</sup>QSY<sup>F</sup>KG<sup>-</sup>VCGV<sup>F</sup>CTEK<sup>W</sup>PNPES<sup>R</sup>RAY<sup>T</sup>LM<sup>V</sup>MA<sup>Q</sup>F  
*S. ratti* NPR-1.2 SGSI<sup>O</sup>GIG<sup>I</sup>F<sup>I</sup>ST<sup>Y</sup>SLCAIA<sup>I</sup>DRY<sup>R</sup>LV<sup>E</sup>SPK<sup>T</sup>SL<sup>T</sup>K<sup>I</sup>QA<sup>I</sup>FA<sup>T</sup>LT<sup>I</sup>W<sup>I</sup>IS<sup>F</sup>I<sup>I</sup>FPY<sup>I</sup>YNM<sup>K</sup>I<sup>V</sup>TY<sup>N</sup>N<sup>-</sup>ICG<sup>Y</sup>FCTE<sup>D</sup>WD<sup>N</sup>DKH<sup>R</sup>Q<sup>I</sup>Y<sup>T</sup>II<sup>I</sup>FF<sup>V</sup>Q<sup>G</sup>

Consensus LP IQGIAVFIGT<sup>F</sup>SLCAIA<sup>V</sup>DRY<sup>I</sup>IMV<sup>L</sup>LP R L K A ITIILW<sup>T</sup>LSII<sup>S</sup>TLPY<sup>A</sup> Y M L Y G ICG FCTE WPN R IY<sup>T</sup>LF<sup>V</sup> VV<sup>Q</sup>F

*B. malayi* NPR-1 -----  
*W. bancrofti* NPR-1 -----RIKER<sup>S</sup>MA<sup>M</sup>ASAG<sup>L</sup>VENP<sup>N</sup>NNV<sup>L</sup>DCKR<sup>-</sup>-----NFGSN<sup>-</sup>-----AFKEN<sup>H</sup>T  
*D. immitis* NPR-1 IIP<sup>L</sup>TI<sup>M</sup>F<sup>I</sup>CY<sup>Y</sup>H<sup>I</sup>FA<sup>E</sup>LR<sup>K</sup>R<sup>T</sup>TSK<sup>K</sup>IM<sup>T</sup>-----  
*O. volvulus* NPR-1 IIP<sup>L</sup>TI<sup>M</sup>F<sup>I</sup>CY<sup>Y</sup>Q<sup>I</sup>FA<sup>E</sup>LR<sup>K</sup>R<sup>T</sup>TSK<sup>K</sup>IM<sup>R</sup>IKER<sup>S</sup>SV<sup>V</sup>MT<sup>S</sup>GG<sup>L</sup>SVEN<sup>A</sup>DN<sup>L</sup>LD<sup>C</sup>NR<sup>-</sup>-----ISD<sup>N</sup>DAF<sup>Q</sup>EN<sup>Q</sup>-----  
*O. ochengi* NPR-1 IIP<sup>L</sup>TI<sup>M</sup>F<sup>I</sup>CY<sup>Y</sup>Q<sup>I</sup>FA<sup>E</sup>LR<sup>K</sup>R<sup>T</sup>TSK<sup>K</sup>IM<sup>R</sup>IKER<sup>S</sup>SV<sup>V</sup>MA<sup>S</sup>AG<sup>L</sup>SVEN<sup>A</sup>DN<sup>L</sup>LD<sup>C</sup>NR<sup>-</sup>-----ISD<sup>N</sup>DAF<sup>Q</sup>EN<sup>Q</sup>-----R<sup>N</sup>EL<sup>V</sup>AN<sup>A</sup>RR<sup>N</sup>T  
*L. loa* NPR-1 VIPL<sup>I</sup>TI<sup>M</sup>F<sup>I</sup>CY<sup>R</sup>IF<sup>A</sup>K<sup>L</sup>R<sup>K</sup>R<sup>T</sup>TSK<sup>K</sup>IM<sup>R</sup>IKER<sup>S</sup>MA<sup>M</sup>ASAG<sup>L</sup>LEN<sup>P</sup>NNM<sup>L</sup>DCKR<sup>-</sup>-----NFD<sup>G</sup>DNDF<sup>K</sup>EN<sup>Q</sup>DR<sup>L</sup>EN<sup>E</sup>LLAN<sup>A</sup>RR<sup>N</sup>T  
*A. suum* NPR-1 VIP<sup>F</sup>TI<sup>M</sup>VAF<sup>C</sup>YAV<sup>I</sup>FAR<sup>L</sup>R<sup>T</sup>AR<sup>L</sup>R<sup>L</sup>Q<sup>R</sup>INER<sup>C</sup>SF<sup>V</sup>LEK<sup>T</sup>NSP<sup>S</sup>SMR<sup>H</sup>PR<sup>F</sup>KAV<sup>-</sup>-----SSE<sup>I</sup>S<sup>D</sup>IC<sup>M</sup>TQ<sup>E</sup>KV<sup>R</sup>HH<sup>L</sup>LK<sup>Q</sup>TR<sup>R</sup>TT  
*A. caninum* NPR-1 VIP<sup>F</sup>TI<sup>M</sup>TI<sup>C</sup>YQAV<sup>F</sup>SLRR<sup>R</sup>AK<sup>S</sup>RL<sup>T</sup>SIA<sup>Q</sup>QAN<sup>L</sup>LYV<sup>V</sup>AATAG<sup>G</sup>DTQ<sup>H</sup>KE<sup>Q</sup>L<sup>T</sup>-----HLIE<sup>Q</sup>K<sup>R</sup>RV<sup>L</sup>Q<sup>R</sup>RR<sup>V</sup>T  
*H. contortus* NPR-1 VIP<sup>F</sup>TI<sup>M</sup>TI<sup>C</sup>YQAV<sup>F</sup>SLRR<sup>R</sup>AK<sup>S</sup>RL<sup>T</sup>SIA<sup>Q</sup>QAN<sup>L</sup>LYV<sup>V</sup>AATAG<sup>G</sup>DTQ<sup>H</sup>KE<sup>Q</sup>-----LTH<sup>L</sup>IE<sup>Q</sup>K<sup>R</sup>RV<sup>M</sup>Q<sup>R</sup>RR<sup>V</sup>T  
*C. elegans* NPR-1 VV<sup>P</sup>FA<sup>V</sup>VAF<sup>C</sup>YAN<sup>I</sup>V<sup>S</sup>VL<sup>S</sup>KRA<sup>Q</sup>T<sup>K</sup>IR<sup>K</sup>M<sup>V</sup>ERT<sup>S</sup>A<sup>L</sup>ESS<sup>C</sup>AF<sup>P</sup>SH<sup>G</sup>LE<sup>Q</sup>YEN<sup>L</sup>-----NEFL<sup>D</sup>K<sup>Q</sup>E<sup>K</sup>E<sup>K</sup>Q<sup>R</sup>V<sup>V</sup>L<sup>O</sup>NR<sup>R</sup>TT  
*N. brasiliensis* NPR-1 IIP<sup>F</sup>TI<sup>M</sup>TI<sup>C</sup>YQAV<sup>F</sup>SLRR<sup>R</sup>AK<sup>S</sup>RL<sup>T</sup>SIA<sup>Q</sup>QAN<sup>L</sup>LYV<sup>V</sup>AATAG<sup>G</sup>DTQ<sup>H</sup>KE<sup>Q</sup>L<sup>T</sup>-----HLFE<sup>Q</sup>K<sup>R</sup>RV<sup>T</sup>Q<sup>R</sup>RR<sup>V</sup>T  
*S. ratti* NPR-1.1 VFP<sup>F</sup>SV<sup>M</sup>VAF<sup>C</sup>YAT<sup>L</sup>FS<sup>K</sup>L<sup>S</sup>RA<sup>K</sup>L<sup>R</sup>IR<sup>K</sup>IDER<sup>F</sup>V<sup>A</sup>LGR<sup>S</sup>SNY<sup>T</sup>NI<sup>S</sup>EHL<sup>A</sup>MET<sup>D</sup>NK<sup>T</sup>CV<sup>V</sup>LST<sup>L</sup>TL<sup>T</sup>V<sup>T</sup>NN<sup>I</sup>E<sup>I</sup>SK<sup>G</sup>NV<sup>P</sup>T<sup>L</sup>AL<sup>Q</sup>E<sup>K</sup>D<sup>K</sup>Q<sup>R</sup>LL<sup>N</sup>Q<sup>T</sup>RR<sup>N</sup>T  
*S. ratti* NPR-1.2 IIP<sup>F</sup>CI<sup>I</sup>TI<sup>C</sup>YQ<sup>I</sup>FA<sup>K</sup>L<sup>H</sup>K<sup>R</sup>AN<sup>F</sup>K<sup>L</sup>LS<sup>T</sup>S<sup>Q</sup>QV<sup>N</sup>LL<sup>S</sup>V<sup>L</sup>TNT<sup>V</sup>TC<sup>I</sup>E<sup>K</sup>KK<sup>R</sup>IE<sup>I</sup>Q<sup>-</sup>-----KKK<sup>I</sup>T

Consensus VIP<sup>F</sup>TI<sup>M</sup> I<sup>C</sup>Y I<sup>F</sup>A L<sup>R</sup>K<sup>R</sup> K<sup>I</sup> R<sup>I</sup> E<sup>R</sup> L K L<sup>L</sup> Q<sup>R</sup> R<sup>R</sup> T

*B. malayi* NPR-1 -----  
*W. bancrofti* NPR-1 IIL<sup>V</sup>SM<sup>V</sup>V<sup>L</sup>F<sup>A</sup>V<sup>S</sup>W<sup>L</sup>PH<sup>N</sup>I<sup>V</sup>S<sup>L</sup>LM<sup>E</sup>F<sup>D</sup>ES<sup>-</sup>----L<sup>F</sup>ER<sup>H</sup>D<sup>G</sup>V<sup>N</sup>SI<sup>Y</sup>L<sup>I</sup>N<sup>L</sup>F<sup>T</sup>H<sup>W</sup>AM<sup>A</sup>NN<sup>V</sup>WN<sup>P</sup>I<sup>L</sup>Y<sup>A</sup>L<sup>N</sup>PL<sup>F</sup>I<sup>E</sup>L<sup>M</sup>AK<sup>T</sup>Y<sup>R</sup>L<sup>R</sup>RL<sup>I</sup>CC<sup>F</sup>CG<sup>E</sup>R<sup>S</sup>T<sup>T</sup>I  
*D. immitis* NPR-1 IIL<sup>V</sup>SM<sup>V</sup>V<sup>L</sup>F<sup>A</sup>IS<sup>W</sup>PH<sup>N</sup>I<sup>V</sup>S<sup>L</sup>LM<sup>E</sup>F<sup>D</sup>ES<sup>-</sup>----L<sup>F</sup>ERS<sup>D</sup>G<sup>V</sup>NSI<sup>Y</sup>L<sup>I</sup>N<sup>L</sup>F<sup>T</sup>H<sup>W</sup>V<sup>H</sup>A<sup>-</sup>-----  
*O. volvulus* NPR-1 -----IAM<sup>A</sup>NN<sup>V</sup>WN<sup>P</sup>I<sup>L</sup>Y<sup>A</sup>L<sup>N</sup>PL<sup>F</sup>I<sup>E</sup>L<sup>M</sup>AK<sup>T</sup>Y<sup>R</sup>L<sup>R</sup>-----  
*O. ochengi* NPR-1 IIL<sup>V</sup>SM<sup>V</sup>V<sup>L</sup>F<sup>A</sup>IS<sup>W</sup>PH<sup>N</sup>I<sup>V</sup>S<sup>L</sup>LM<sup>E</sup>F<sup>D</sup>ET<sup>-</sup>----I<sup>F</sup>ER<sup>H</sup>D<sup>G</sup>V<sup>N</sup>NI<sup>Y</sup>L<sup>I</sup>N<sup>L</sup>F<sup>T</sup>H<sup>-</sup>IAM<sup>A</sup>NN<sup>V</sup>WN<sup>P</sup>I<sup>L</sup>Y<sup>A</sup>L<sup>N</sup>PL<sup>F</sup>I<sup>E</sup>L<sup>M</sup>AK<sup>T</sup>Y<sup>R</sup>L<sup>R</sup>-----  
*L. loa* NPR-1 IIL<sup>V</sup>SM<sup>V</sup>V<sup>L</sup>F<sup>A</sup>V<sup>S</sup>W<sup>L</sup>PH<sup>N</sup>I<sup>V</sup>S<sup>L</sup>LM<sup>E</sup>F<sup>D</sup>ES<sup>-</sup>----L<sup>F</sup>ERY<sup>D</sup>G<sup>V</sup>NSI<sup>Y</sup>L<sup>I</sup>N<sup>L</sup>F<sup>T</sup>H<sup>W</sup>AM<sup>A</sup>NN<sup>V</sup>WN<sup>P</sup>I<sup>L</sup>Y<sup>A</sup>L<sup>N</sup>PL<sup>F</sup>I<sup>E</sup>L<sup>M</sup>AE<sup>T</sup>Y<sup>R</sup>L<sup>R</sup>AIL<sup>C</sup>CC<sup>F</sup>Y<sup>R</sup>EP<sup>S</sup>T<sup>I</sup>R  
*A. suum* NPR-1 MIL<sup>V</sup>SM<sup>V</sup>VF<sup>I</sup>F<sup>A</sup>LT<sup>W</sup>PH<sup>N</sup>I<sup>V</sup>S<sup>L</sup>I<sup>I</sup>E<sup>Y</sup>DES<sup>N</sup>R<sup>F</sup>FR<sup>T</sup>FG<sup>I</sup>D<sup>N</sup>MS<sup>L</sup>S<sup>Y</sup>L<sup>I</sup>N<sup>L</sup>F<sup>T</sup>H<sup>S</sup>V<sup>A</sup>MT<sup>N</sup>I<sup>A</sup>N<sup>P</sup>V<sup>L</sup>Y<sup>A</sup>W<sup>L</sup>N<sup>P</sup>FR<sup>H</sup>L<sup>V</sup>I<sup>Q</sup>CC<sup>R</sup>RY<sup>Q</sup>PI<sup>Q</sup>R<sup>N</sup>-NV<sup>K</sup>CD<sup>A</sup>N<sup>T</sup>  
*A. caninum* NPR-1 IIL<sup>V</sup>SM<sup>V</sup>V<sup>I</sup>F<sup>G</sup>IT<sup>S</sup>LPH<sup>N</sup>I<sup>V</sup>S<sup>T</sup>LM<sup>E</sup>F<sup>T</sup>DS<sup>-</sup>---Q<sup>D</sup>LL<sup>A</sup>Y<sup>N</sup>G<sup>N</sup>D<sup>Y</sup>I<sup>Y</sup>L<sup>L</sup>N<sup>L</sup>I<sup>I</sup>TH<sup>F</sup>L<sup>A</sup>ML<sup>S</sup>C<sup>V</sup>AN<sup>P</sup>L<sup>L</sup>Y<sup>A</sup>F<sup>L</sup>N<sup>P</sup>E<sup>F</sup>REL<sup>I</sup>L<sup>N</sup>G<sup>L</sup>AG<sup>I</sup>W<sup>A</sup>PR<sup>F</sup>V<sup>S</sup>R<sup>T</sup>W<sup>Q</sup>P<sup>T</sup>Q<sup>T</sup>  
*H. contortus* NPR-1 IIL<sup>V</sup>SM<sup>V</sup>V<sup>I</sup>F<sup>G</sup>IT<sup>S</sup>LPH<sup>N</sup>I<sup>V</sup>S<sup>T</sup>LM<sup>E</sup>F<sup>T</sup>DS<sup>-</sup>---D<sup>L</sup>L<sup>A</sup>Y<sup>N</sup>G<sup>N</sup>D<sup>Y</sup>I<sup>Y</sup>L<sup>L</sup>N<sup>L</sup>I<sup>I</sup>TH<sup>F</sup>L<sup>A</sup>ML<sup>S</sup>C<sup>V</sup>AN<sup>P</sup>L<sup>L</sup>Y<sup>A</sup>F<sup>L</sup>N<sup>P</sup>E<sup>F</sup>REL<sup>I</sup>L<sup>N</sup>G<sup>L</sup>AG<sup>I</sup>W<sup>A</sup>PR<sup>F</sup>V<sup>S</sup>R<sup>T</sup>-----  
*C. elegans* NPR-1 SIL<sup>V</sup>T<sup>M</sup>V<sup>V</sup>W<sup>F</sup>G<sup>I</sup>T<sup>W</sup>PH<sup>N</sup>I<sup>V</sup>S<sup>L</sup>I<sup>I</sup>E<sup>Y</sup>DD<sup>T</sup>Q<sup>S</sup>FR<sup>L</sup>Y<sup>G</sup>R<sup>D</sup>Y<sup>D</sup>YS<sup>L</sup>L<sup>N</sup>L<sup>F</sup>TH<sup>S</sup>L<sup>A</sup>MS<sup>N</sup>N<sup>V</sup>L<sup>N</sup>P<sup>V</sup>L<sup>Y</sup>A<sup>W</sup>L<sup>N</sup>P<sup>S</sup>FR<sup>Q</sup>L<sup>V</sup>I<sup>K</sup>I<sup>F</sup>Y<sup>G</sup>D<sup>R</sup>K<sup>S</sup>DR<sup>I</sup>I<sup>N</sup>Q<sup>T</sup>S<sup>V</sup>Y<sup>K</sup>T  
*N. brasiliensis* NPR-1 IIL<sup>V</sup>SM<sup>V</sup>V<sup>I</sup>F<sup>G</sup>IT<sup>S</sup>LPH<sup>N</sup>I<sup>V</sup>S<sup>T</sup>LM<sup>E</sup>F<sup>T</sup>DS<sup>-</sup>---D<sup>L</sup>L<sup>A</sup>Y<sup>N</sup>G<sup>N</sup>D<sup>Y</sup>I<sup>Y</sup>L<sup>L</sup>N<sup>L</sup>I<sup>I</sup>TH<sup>F</sup>L<sup>A</sup>ML<sup>S</sup>C<sup>V</sup>AN<sup>P</sup>L<sup>L</sup>Y<sup>A</sup>F<sup>L</sup>N<sup>P</sup>E<sup>F</sup>REL<sup>I</sup>L<sup>N</sup>G<sup>L</sup>AG<sup>I</sup>W<sup>A</sup>PR<sup>F</sup>V<sup>S</sup>R<sup>T</sup>-----  
*S. ratti* NPR-1.1 IIL<sup>V</sup>SM<sup>V</sup>V<sup>I</sup>F<sup>G</sup>LT<sup>W</sup>PH<sup>N</sup>I<sup>V</sup>S<sup>L</sup>V<sup>L</sup>E<sup>Y</sup>DD<sup>T</sup>Q<sup>T</sup>IF<sup>K</sup>ID<sup>G</sup>DD<sup>L</sup>DL<sup>S</sup>Y<sup>L</sup>V<sup>N</sup>L<sup>F</sup>TH<sup>S</sup>L<sup>A</sup>MT<sup>N</sup>I<sup>V</sup>FN<sup>P</sup>V<sup>L</sup>Y<sup>A</sup>W<sup>L</sup>N<sup>P</sup>FR<sup>L</sup>DL<sup>C</sup>I<sup>Q</sup>I<sup>F</sup>Y<sup>K</sup>N<sup>R</sup>K<sup>A</sup>K<sup>S</sup>T<sup>N</sup>K<sup>N</sup>L<sup>S</sup>K<sup>C</sup>I<sup>T</sup>S  
*S. ratti* NPR-1.2 IIL<sup>V</sup>SM<sup>V</sup>V<sup>I</sup>F<sup>A</sup>S<sup>L</sup>PL<sup>N</sup>I<sup>V</sup>S<sup>I</sup>TEL<sup>S</sup>SG<sup>-</sup>---L<sup>F</sup>IL<sup>N</sup>G<sup>T</sup>DI<sup>T</sup>Y<sup>T</sup>T<sup>N</sup>I<sup>C</sup>A<sup>H</sup>G<sup>I</sup>A<sup>M</sup>I<sup>C</sup>T<sup>N</sup>P<sup>L</sup>Y<sup>A</sup>L<sup>N</sup>P<sup>E</sup>FR<sup>I</sup>L<sup>V</sup>M<sup>K</sup>SI<sup>-</sup>-----

Consensus IIL<sup>V</sup>SM<sup>V</sup>V<sup>I</sup>F<sup>A</sup>IT<sup>W</sup>LPH<sup>N</sup>I<sup>V</sup>S<sup>L</sup>LM<sup>E</sup>F<sup>D</sup>ES DG TYL<sup>I</sup>N<sup>L</sup>F<sup>T</sup>H IAM<sup>N</sup> V NP<sup>I</sup>LY<sup>A</sup> LNP<sup>F</sup>REL<sup>M</sup>I TL R

|                              |                                                                                                      |
|------------------------------|------------------------------------------------------------------------------------------------------|
| <i>B. malayi</i> NPR-1       | -----                                                                                                |
| <i>W. bancrofti</i> NPR-1    | REETFEEV-----                                                                                        |
| <i>D. immitis</i> NPR-1      | -----                                                                                                |
| <i>O. volvulus</i> NPR-1     | -----                                                                                                |
| <i>O. ochengi</i> NPR-1      | -----                                                                                                |
| <i>L. loa</i> NPR-1          | EEPLEVE-----                                                                                         |
| <i>A. suum</i> NPR-1         | SKISNNAAINCIGEISHDSPQEIGRIPQLKTATHEDKIHSHYRQKYDDEDVSCADESNEAKHPNVLHRYRVPTSHQNDGNTENPNENATALFTNNMMLIS |
| <i>A. caninum</i> NPR-1      | TCCATKAPHSVLVAI-----                                                                                 |
| <i>H. contortus</i> NPR-1    | -----                                                                                                |
| <i>C. elegans</i> NPR-1      | KIVHDTKHLNGRAKIGGGGSHEALKERELNSCSENLSYHVNGHTRPTPEVQLNEVSSPEISKLVAEPEELIEFSVNDTLV-----                |
| <i>N. brasiliensis</i> NPR-1 | -----                                                                                                |
| <i>S. ratti</i> NPR-1.1      | ETKLNHNDSFIPLRDEGKKIITSYQTSKTMEQQQ-----                                                              |
| <i>S. ratti</i> NPR-1.2      | -----                                                                                                |

Consensus

## 2. NPR-2 homologues

*A. suum* NPR-2 -----D I V Y I E F Q D P S M K L E V I A S F A L I Y S V I F V L G V I G N T F V I F L T L R H K K L  
*A. caninum* NPR-2 -----  
*N. brasiliensis* NPR-2.1 -----C H R Y V D D H P D L T N E P I I M L V F A I L Y V H I F V L G I V G N V A V L Y L T L K N R H L  
*N. brasiliensis* NPR-2.2 -----E C A V F T D Q V K D P S L E T P V V V F S I L Y A T E F F L G I I G N I G V I Y L T F G N K K L  
*H. contortus* NPR-2.1 -----C H R Y V D D H P D L T N E L A V M I I F A V L Y V H I F V L G I V G N V A V L Y L T L K N R H L  
*H. contortus* NPR-2.2 -----  
*C. elegans* NPR-2 M S M V N T R V E A P D L L A L K N M L R Q S D G T R M L Q E M R R K L I Q L H S S Q M I N E T E E T C D R Y I D K H P D M T N E P T V L V T F S L L Y L H I F L L G I L G N S A V L Y L T M K H R Q L  
*S. ratti* NPR-2 -----L S Q V N N T K G L Q I M N N I H E Y P Q T C E Y Y Q S L N Y A D S R Y N C T V F H I K C P D L T N E I P V M I S F L L Y Y T I I F V F G I I G N F I I A W L T L K N K S L  
*B. xylophilus* NPR-2 -----M T L F A I V Y T H I F V L G I I G N L S I M F L T L R Y H H L  
*G. pallida* NPR-2 -----M E M L F T S G D A P S S S S T A A T I Q T A R L H S A V V Q L E Q P H E Q Q Q Q Q C L H Y V D Q Q P D P S N S A W A I T L F L A L Y S N I F V L G L L G N L A I V L V T I R C O H L  
*M. hapla* NPR-2 -----Y I I Q S P D P T N S L L A I I I F G I I Y I N I F I F G L L G N L A I V L L T L R C R H L  
*M. incognita* NPR-2 -----Y I I Q S P D P T N S L L A I I I F G I I Y I N I F I F G L L G N L A I V L L T L R C S H L  
  
Consensus C Y I D P D T N V I I F A I L Y I F V L G I I G N L A I L Y L T L R R H L

*A. suum* NPR-2 Q T V Q N F I L N L A G A D L V V C I F S L P I T P I T N Y K N W Y F G S T M C H G L P W M Q G - I A V F I G T F S L C A I S I D R Y L M V T L P T K K I I D K T R S I W T A I L W T L S I I F T  
*A. caninum* NPR-2 -----S R G S T T S A S I E I P R S F R G S V A V D N I R S S ---L  
*N. brasiliensis* NPR-2.1 Q S V Q N I F I L N L A A S D V L M C I T S L P I T P I T N Y K T W F F A S P V C K L I P L V Q G - A S V F V S T F S L S A I A L D R Y N L V V R P H R H P L R S R G A S V A L L L W I I S A L V C  
*N. brasiliensis* NPR-2.2 Q T V Q N F I L N L A A D L I V C I F S L P I T P I T N I Y K N W Y F G D K M C H S L P W I Q G - A S V F V A T F S L A L A I A I N R Y Q M V V S P H K R M T P T Q A R F V M I G L W I S S V L I T  
*H. contortus* NPR-2.1 Q S V Q N I F I L N L A A S D V L M C I T S L P I T P I T N Y K T W F F A S P V C K L I P L V Q G - A S V F V S T F S L S A I A L D R Y N L V V R P H R H P L R S R G A S V A L L L W I I S A L V C  
*H. contortus* NPR-2.2 ---Q N M F I L N L A A D L I V C I F S L P I T P V T S I Y K N W Y F G E L M C H S L P W I Q G - A S V F V A T F S L A A I A I D R Y M M V V T P H Q R R M T --H A R L V M V C L W V I S G L I T  
*C. elegans* NPR-2 Q T V Q N I F I L N L C A S N V L M C I T S L P I T F I T N Y K W F F S P V C K L I P L V Q G - A S I F V S T F S L S A I A I D R Y N L V V R P H K Q K L S R S A M M I A L L I W V I S V V V C  
*S. ratti* NPR-2 Q T V Q N I F I L N L V I S D I V I C I F S V P V T P I T L I F K N W Y F G S L M C H L M P L A Q V N I L F F V S T L S L S A I A I D R Y I L V V K P H T P I T I K G A R N T A I A L W L F S I L I S  
*B. xylophilus* NPR-2 R T V Q N I F I L N L A I S D V I V C L L S L P F T P V T S I Y K V M F G Q P I C H L L P L V Q A - V S I F V S T F S L S A I A I D R Y N L V V R P H A R P L T I H G A R N V A V L W L S V V V S  
*G. pallida* NPR-2 R S V Q N I F I L N L A I S D I V C L L S L P F T P V S Y I Y K E W L F G S A I C H L L P M V Q A - A S V F V S T F S L S A I A I D R Y W L V I Y P H S G S I S P A K A T V V A A V L W L L S V L I S  
*M. hapla* NPR-2 R S V Q N I F I L N L A I S D V I V C L L S L P F T L V T N I F K E W L F G S A I C H L L P M V Q A - V S V L V S T F S L S A I A I D R Y W L V K ---  
*M. incognita* NPR-2 R S V Q N I F I L N L A I S D V I V C L L S L P F T L V T N I F K E W L F G S A I C H L L P M V Q A - V S V L V S T F S L S A I A I D R Y W L V H R P H G H S L S P S Q A T T V A C I L W A F S L F I S  
  
Consensus Q S V Q N I F I L N L A I S D V I V C L S L P I T P I T N I Y K W Y F G S I C H L L P L V Q G A S V F V S T F S L S A I A I D R Y L V V R P H L S A V V A L L L W I I S V L I S

*A. suum* NPR-2 L P Y A M Y M D I V V D G I C G Q F C T E K W P D S G L R R T Y T I F V F I V Q F I L P L I I M F I C Y Y K I F D E L K K R - T T K K I K Q I R E R S V V L A S A L A C T P N Q V A S H A L A E K D T  
*A. caninum* NPR-2 Y A Y G W Y M D V E Q L P G I C G E F C T E R W P S S E V R K G Y A L M V L V M Q F I L P F A T M A V C Y A I F A R L R E R - T E S K L K K L T E R T Q L L E S --T A G S S P S G K N E A G T H P  
*N. brasiliensis* NPR-2.1 M P Y G W Y M D V R I G G L C G E F C T E Q W P L P E V R K G Y A L M V L V M Q F I L P F A T M A V C Y Y T I F A R L R E R - T E S K L K K L T E R S Q L L E S --A A G N Q S P S A K A E N G A H P  
*N. brasiliensis* NPR-2.2 L P Y S W Y M A V E H D G L C G K F C T E I W F S P Q L R Q A Y T F V M I A Q F F V P F W I M F Y C Y S R I F K H L K R R - T Q A K I R K M N E R S L I L T A S M P V L S T V K R K M G T K V D V L  
*H. contortus* NPR-2.1 M P Y G W Y M D V R I G G L C G E - C T E K W P L P E V R K G Y A L M V L V M Q F I L P F A T M A V C Y Y T I F A R L R E R R T E S K L K K L S E R S Q L L E S --A V G N S S P S A K T E N G A H T  
*H. contortus* NPR-2.2 L P Y S W F M T L E E H E G L C G K F C T E A W P N A R L R Q A Y T F V L I T Q F L P F W I M F Y C Y S K I F K H L R R R - T Q A R I R K M N E R S L I L T A S M P V L T T V K R K M D A N V D I L  
*C. elegans* NPR-2 M P Y G W Y M D V E K L N G L C G E Y C S E H W L A E V R K G Y T F L V L I T Q F L P F A T M A F C Y N I F S R L R Q R - V E T K L K K L S E R S Q L L E N S T T C G T T N H I V S I N A E A V Q  
*S. ratti* NPR-2 S P Y G V M D I E K Y P F C G D Y C D E Q W S D G - V K P I F S L A V F T A Q F L I P C L T M A F C Y I C I F A K L R A R - T N V K L K K I T E R -----S L L D Q  
*B. xylophilus* NPR-2 L P Y A Y M R L E T Y E E L C G Q F C T E I W F S K S M Q R S Y A L V V L I M Q F L L P F V T M S F C Y S T I F S K L R E R - A N S K L K K L D E R S Q L L N I ---H-----Q A L D K K D S V K L



### 3. NPR-3 homologues

*A. suum* NPR-3 -----IQQSLPKKVDLLIQQLIFSVLYFLVWTVAVSGNSLVLYIVTVK  
*A. caninum* NPR-3 -----  
*N. brasiliensis* NPR-3 -----ISGMSNCTNIRDSMFTTIDLTARLVFGMLYTLVWVAIVGNLTVLYVVSFN  
*H. contortus* NPR-3 -----EMSTNCTR IQDTMFETIDLTAVRLVFCVLYCLVWVAIVGNLTVLYVVSFN  
*C. elegans* NPR-3 -----MEGGRNCVMTVQQWQPEYNDMNQIRAFSLLYLLVWVGAIVGNLTVLYVLTFN  
*B. xylophilus* NPR-3 -----MSNVVDYDGVSPVWENFLWRHHQQNCTPIQESIPEKVDSLPIQLLFSVLYITVWLCAITGNLCVTYVVTLK  
*G. pallida* NPR-3 MDYYSPPDNNQQNNNGLSTALAPDQWPQNVVEPNVWPHFLWRSHPPGDRHNICLP IQASFPELVDLLPIQLLFSVLYLLIWLASIVGNASVLYVVS LK  
*M. hapla* NPR-3 -----MVDLLPVQLLFSFLYLLIWLAAAILGNVSVLYVVS LK  
*M. incognita* NPR-3 -----PEMVDLLPVQLLFSFLYLLIWLAAAILGNVSVLYVVS LK  
  
 Consensus IQ S PE VDLL IQLIFSVLYLLVWLAIVGN VLYVVS LK

*A. suum* NPR-3 QVSLV-VRTIIFGSLAVSDILMSLTSLPVAVTIFTRDWVFPFICKLIGVFQGGSI FVSSFTLTIAVDRMLLI LYPSEAITTERALSIVLG IWAIGY  
*A. caninum* NPR-3 -----A IWL V L G Y  
*N. brasiliensis* NPR-3 QVS-----D L L M S L T S L P W T A V T I F T R E W I F P A P I C K L I G V F Q  
*H. contortus* NPR-3 QVSLV-VRSVFI GCLAVSDMLMSLTSLPVAVSIFTRDWVFPFICKLIGVFQGGSI FVSSFTLTIAVDRMLLI LKPNKEIIGNRAVAIVVA IWLVTGY  
*C. elegans* NPR-3 QVSLV-VRTIVYGC LAGSDLLMCLFSLPITAVSIFTRDWVFPFICKLIGVFQGGTI FVSSFTLTIAVDRMLLI LRPNQEIIVNFPRAVFI VFCIWL L G Y  
*B. xylophilus* NPR-3 QVSLAVRSVFI CSLAVSDI VMSLTSLPITAVSIFTRDWVFPGICCKLMGLFQGGSV FVSSFTLTIAVDRYILLI KHPASSKVNFNKALYSVIL I W I M G Y  
*G. pallida* NPR-3 QVQLSSVRSVFI CSLAASDILMSLTSLPITAVSIFTRDWVFPFICKLMGIFQGGI V FVSSFTLTIAVDRYILLI RHPKQKIKFRTAVSIVVGVWALGY  
*M. hapla* NPR-3 QVQLSSVRSVFI CSLAASDILMSLTSLPITAVSIFTRDWVFPFICKLMGIFQGGAV FVSSFTLTIAVDRYILLI KHPKQKIKFRTALSIVAS I W L V L G Y  
*M. incognita* NPR-3 QVLLS-VRSVFI CSLAASDILMSLTSLPITAVSIFTRDWVFPFICKLMGIFQGGAV FVSSFTLTIAVDRYILLI KHPKQVIKFRTALSIVAS I W L V L G Y  
  
 Consensus QVSLV VRSVFI SLA SDILMSLTSLPITAVSIFTRDWVFP FCKLIGVFQGGSV FVSSFTLT IAVDR I L I H P K I F ALSIV IWL V L G Y

*A. suum* NPR-3 SLSLPNGIFSRIVHYFPYCGTFCEEAWPDSNLEDG----SKLGRHYGTAVMTLQFGVPALISSFCYWRISRVITQQIE-KRREQQIMLKESEKLT SRRT  
*A. caninum* NPR-3 SLALPTGIFSKAVSFEKICGVFCEEIWPDTSESGLS---SPSRRLYGLSVLLSQFGIPALISSVCYWLSRVMSQLE-RRRGH-TLLKESSEKLVNRKT  
*N. brasiliensis* NPR-3 -----  
*H. contortus* NPR-3 ALALPVGIFSRASVYGETICGVFCEEI W--FRPDAMETGHSAGRRLYGLSVLLSQFGVPALISSVCYWLSRVMSQLE--RRRGHTLLKESSEKLVNRKA  
*C. elegans* NPR-3 SLALPVGIVSDIAVYDEICGTFCEENWPDFNPD TGR---SGIRRAYGLSVLVLQFGIPALISSICYWMSRVMSDQLA-RRRGH-NIRPESSEKLVNRKT  
*B. xylophilus* NPR-3 LFPALPVGIFSTTESYYPFCGTFCEEI WFNFRPDTNNRGDSQMRKTYGLAVLIIQFGLPLVISSLCYWSIGRIISROIK-KRHQOQILLQDNQHRL ENRKH  
*G. pallida* NPR-3 ACALPIGIFSSIQVYPPFCGTFCEENWPD TDEQSGR---SRIRKLYGLLVLIQFGLPTVISSLCYWSIGLNFE LARE---RQVLLQESKDRMKSQKN  
*M. hapla* NPR-3 TCTLPVGIFSSIVEYSPFCGTFCEENWPD TDTQSGR---SRLRKFYGLLVLIQFGLPLVLISTLCYWKIGQLIRLQMRRSERQMVILQESKDRMKSQKS  
*M. incognita* NPR-3 ACAMPVGIFSSIVEYSPFCGTFCEENWPD TDTQSGR---SRLRKFYGLLVLIQFGLPLVLISTLCYWQIGKLR--R---RSERQMVILQESKDRMKSQKS  
  
 Consensus A ALPVGIFS TV Y PFCG FCEE WPD T SG S L R K Y G L S V L V I Q F G L P L I S S L C Y W I R V I S Q L R R Q V L L E S D K L R K T

```

A. suum NPR-3      RSNRMMVCMVLCGLVLAWLPLNLIINLSRDFN---GVTAWFSTLFAFCHVIAMTSAAWNPIIYSWFNPQLRMAIKSI-----
A. caninum NPR-3   RANRMMIAMVLGFLFAWMPKNAINLYRDLG---SSVNSNKVINGICAV-----
N. brasiliensis NPR-3 ---RMMIAMVLCGLILAWMPLINAINLYRD-----AMTSAALNPVIYSWFNPQFR-----
H. contortus NPR-3 RANRMMITMVLGFLFAWMPNAINLYRDFGSE--SNTWTFSTVFALCHVSAMTSAALNPVIYSWFNPQFRGAIQSL-----
C. elegans NPR-3   RANRMMIVMVVGFVLAWMPFNAINLYRDLF---GISKMYSTVFALCHVCAMCSAVLNPIIYSWFNPQFRQSIITLFGKTDEARLIKKKPKQSTSKMVSYP
B. xylophilus NPR-3 RSNRMMIAMVGGGLVLAWLPMNLIINLMRDFDASPDFSDWYSLVFAGCHVAMTSAVWNPIIYSWFNLPQFKQTLQACNQHTKQSGYNVVTRAKSVATEGP
G. pallida NPR-3   RTNRMMVTMVLGLVLAWLPMNLIINLWRDFNSE--NSTEWYSLIFAACHSVAMTSAVWNPIIYSWFNPQFKETIRTSLERRRQSQVPKFFGIFVLLLKAL
M. hapla NPR-3     KTNLMMATMVAGLVLAWLPMNLIINLWRDLN---NNTAWFSLIFAASHSTAMTSAVWNPIIYSWFNPQFRETIRKVLERNNNHLTTSSPNFNSNGYCSV
M. incognita NPR-3 KTNLMMATMVAGLVLAWLPMNLIINLWRDLN---NENSWFSLIFAASHSTAMTSAVWNPIIYSWFNPQFRETI-----

```

```

Consensus          RTNRMMI_MVLGLVLAWLPMNLIINLYRD..      T_WFSLIFA_CHVIAMTSAVWNPIIYSWFNPQFR_TI

```

```

A. suum NPR-3      -----
A. caninum NPR-3   -----
N. brasiliensis NPR-3 -----
H. contortus NPR-3 -----
C. elegans NPR-3   TNFSEIRKETEIASTKTKITIAENDYRAGDQLL-----
B. xylophilus NPR-3 EF-----
G. pallida NPR-3   KKRIIFNNENAKFRLPPLC-----
M. hapla NPR-3     NNNDYIRRSSARSLLSALGTAIGVKDDKREGLKTMRNSVVFLLPPKRLKNK
M. incognita NPR-3 -----

```

```

Consensus

```

#### 4. NPR-4 homologues

|                              |             |               |        |       |    |   |   |   |   |   |   |   |   |   |   |   |   |   |   |   |   |   |   |   |   |   |   |   |   |   |   |   |   |   |   |   |   |   |   |   |   |   |   |   |   |   |   |   |   |   |   |   |   |   |   |   |   |   |   |   |   |   |   |   |   |   |   |   |   |   |
|------------------------------|-------------|---------------|--------|-------|----|---|---|---|---|---|---|---|---|---|---|---|---|---|---|---|---|---|---|---|---|---|---|---|---|---|---|---|---|---|---|---|---|---|---|---|---|---|---|---|---|---|---|---|---|---|---|---|---|---|---|---|---|---|---|---|---|---|---|---|---|---|---|---|---|---|
| <i>B. malayi</i> NPR-4       | -----MYNNNN | CLDMNAELWRNRD | WSTQ   | SFT   | I  | F | V | V | F | F | F | A | I | L | I | G | I | G | V | G | N | L | C | V | I | L | A | I | S | R | T | R | L | Q | T | V | P | N | M | F | I | F | S | L | S | C | S | D | L | V |   |   |   |   |   |   |   |   |   |   |   |   |   |   |   |   |   |   |   |   |
| <i>W. bancrofti</i> NPR-4    | -----MYNNNN | CLDMNAELWRNRD | WSTQ   | SFT   | I  | F | V | V | F | F | F | A | I | L | I | G | I | G | V | G | N | L | C | V | I | L | A | I | S | R | T | R | L | Q | T | V | P | N | M | F | I | F | S | L | S | C | S | D | L | V |   |   |   |   |   |   |   |   |   |   |   |   |   |   |   |   |   |   |   |   |
| <i>D. immitis</i> NPR-4      | -----DNN    | CLDMNAELWRN   | KHDW   | STHS  | T  | I | F | V | V | F | F | T | A | I | L | I | G | I | G | V | G | N | L | C | V | I | L | A | I | S | R | T | R | L | Q | T | V | P | N | M | F | I | F | S | L | S | C | S | D | L | V |   |   |   |   |   |   |   |   |   |   |   |   |   |   |   |   |   |   |   |
| <i>O. volvulus</i> NPR-4     | -----NNN    | CLDMNAELWRN   | S      | R     | D  | W | S | T | Q | S | S | T | V | F | V | F | F | F | G | A | I | L | I | G | I | G | V | G | N | L | C | V | I | L | A | I | S | R | T | R | L | Q | T | V | P | N | M | F | I | F | S | L | S | C | S | D | V |   |   |   |   |   |   |   |   |   |   |   |   |   |
| <i>O. ochengi</i> NPR-4      | -----NNN    | CLDMNAELWRN   | S      | R     | D  | W | S | T | Q | S | S | T | V | F | V | F | F | F | G | A | I | L | I | G | I | G | V | G | N | L | C | V | I | L | A | I | S | R | T | R | L | Q | T | V | P | N | M | F | I | F | S | L | S | C | S | D | V |   |   |   |   |   |   |   |   |   |   |   |   |   |
| <i>L. loa</i> NPR-4          | -----MYNNN  | CLDMNAELWRNRD | WSTQ   | SST   | I  | F | V | V | F | F | F | A | I | L | I | G | I | G | I | G | N | L | C | V | I | L | A | I | S | R | T | R | L | Q | T | V | P | N | M | F | I | F | S | L | S | C | S | D | L | V |   |   |   |   |   |   |   |   |   |   |   |   |   |   |   |   |   |   |   |   |
| <i>A. suum</i> NPR-4         | -NALWCN     | KSRCAVLF      | LILPKK | SLRMS | NE | C | L | D | M | N | E | L | W | R | F | R | N | D | L | T | Q | P | A | V | M | A | F | A | L | L | Y | A | T | I | V | L | G | I | F | G | N | L | C | V | I | L | A | I | A | R | T | R | S | L | Q | T | V | P | N | L | F | I | F | S | L | S | C | S | D | V |
| <i>N. brasiliensis</i> NPR-4 | -----MRNST  | CLN           | N      | D     | E  | L | W | E | Y | R | N | D | Y | T | T | R | A | F | T | M | V | E | A | F | F | S | V | I | L | C | G | F | V | G | N | L | C | V | I | L | A | I | T | R | N | V | L | Q | T | V | P | N | L | F | I | L | S | L | S | C | S | D | I |   |   |   |   |   |   |   |
| <i>H. contortus</i> NPR-4    | -----TTPV   | L             | S      | R     | T  | S | K | F | S | K | R | S | E | F | C | F | V | S | T | M | V | F | A | I | L | S | V | I | L | C | G | F | I | G | N | L | C | V | I | A | I | T | R | N | V | L | Q | T | V | P | N | L | F | I | L | S | L | S | F | S | D |   |   |   |   |   |   |   |   |   |
| <i>C. elegans</i> NPR-4      | -----MNGSD  | CLN           | N      | S     | E  | L | W | L | Y | R | E | D | L | S | R | W | Y | I | M | L | E | F | A | F | L | L | I | I | A | A | G | I | I | G | N | L | C | V | I | L | A | I | T | R | N | S | L | Q | T | V | P | N | L | F | I | L | S | L | S | C | S | D |   |   |   |   |   |   |   |   |
| <i>S. ratti</i> NPR-4        | -----N      | C             | T      | T     | L  | N | E | Y | R | Q | T | S | N | D | W | S | T | Y | S | V | W | F | F | A | V | I | S | I | I | L | S | G | I | V | G | N | L | C | V | I | L | A | I | R | T | K | S | L | Q | T | V | P | N | Y | F | I | M | S | L | S | C | S | D |   |   |   |   |   |   |   |
| <i>B. xylophilus</i> NPR-4   | -----CSS    | V             | N      | E     | Q  | L | W | V | L | R | R | D | P | T | Q | L | W | V | W | A | E | F | A | F | F | S | L | I | I | C | G | C | L | G | N | L | C | V | I | L | A | I | S | R | T | K | S | L | Q | T | V | P | N | M | F | I | F | S | L | S | C |   |   |   |   |   |   |   |   |   |
| <i>G. pallida</i> NPR-4      | -----MAFP   | N             | D      | M     | N  | H | F | L | W | E | F | Q | R | D | P | T | S | R | P | L | T | A | V | F | A | V | V | S | L | I | V | L | G | V | S | G | N | L | C | V | I | L | S | I | G | R | T | R | S | L | Q | T | V | S | N | L | F | I | F | S | L | S |   |   |   |   |   |   |   |   |
| <i>M. hapla</i> NPR-4.1      | -----MELH   | S             | P      | T     | L  | L | F | N | A | S | T | P | S | V | C | E | D | M | N | A | L | W | N | A | R | R | D | L | T | R | P | F | V | M | L | A | F | A | S | F | Y | S | I | I | L | G | I | G | N | S | C | V | I | L | A | I | R | S | L | Q | T | V | P | N | M |   |   |   |   |   |
| <i>M. hapla</i> NPR-4.2      | MQ          | E             | I      | H     | L  | I | Y | N | N | Q | N | N | N | N | Y | S | E | F | I | S | L | P | C | V | D | M | N | K | I | L | A | L | R | D | P | T | A | R | L | P | I | A | A | F | A | S | L | Y | T | I | K | N | F | L | F | K | G |   |   |   |   |   |   |   |   |   |   |   |   |   |
| <i>M. incognita</i> NPR-4    | ---ME       | A             | S      | T     | M  | E | L | L | P | P | T | I | L | F | N | V | S | A | P | S | V | I | C | E | D | M | N | A | L | W | N | T | R | R | D | L | T | C | P | F | V | M | A | F | A | S | L | Y | S | I | L | G | I | G | N |   |   |   |   |   |   |   |   |   |   |   |   |   |   |   |

Consensus TCLDMNAELW RRDWSTQ TM IFAFFYSVILIGIVGNLCVILAI SRTRSLQTVPNMFI FLSLCS DIV

|                              |   |   |   |   |   |   |   |   |   |   |   |   |   |   |   |   |   |   |   |   |   |   |   |   |   |   |   |   |   |   |   |   |   |   |   |   |   |   |   |   |   |   |   |   |   |   |   |   |   |   |   |   |     |   |   |   |   |   |   |   |   |   |   |   |   |   |   |   |   |   |   |   |   |   |   |   |   |   |   |   |   |   |   |   |   |   |   |   |   |   |   |   |   |   |   |   |
|------------------------------|---|---|---|---|---|---|---|---|---|---|---|---|---|---|---|---|---|---|---|---|---|---|---|---|---|---|---|---|---|---|---|---|---|---|---|---|---|---|---|---|---|---|---|---|---|---|---|---|---|---|---|---|-----|---|---|---|---|---|---|---|---|---|---|---|---|---|---|---|---|---|---|---|---|---|---|---|---|---|---|---|---|---|---|---|---|---|---|---|---|---|---|---|---|---|---|---|
| <i>B. malayi</i> NPR-4       | C | F | T | S | A | T | I | P | I | A | A | F | K | K | E | W | I | F | G | A | V | L | C | S | I | A | P | F | I | A | G | A | S | L | C | F | S | T | F | T | L | S | A | I | S | V | D | R | F | L | L | I | F   | P | T | R | K | A | L | S | R | L | Q | A | L | I | V | I | M | V | I | C | I | L | S | T | S | L | S | A | P | V | I | F | K | Q | R | L | K | R | F | G | N | Y | C | G |
| <i>W. bancrofti</i> NPR-4    | C | F | T | S | A | T | I | P | I | A | A | F | K | K | E | W | I | F | G | P | V | L | C | S | I | A | P | F | I | A | G | A | S | L | C | F | S | T | F | T | L | S | A | I | S | V | D | R | F | L | L | I | F   | P | T | R | K | A | L | S | R | L | Q | A | L | I | V | I | M | V | I | C | I | L | S | T | S | L | S | A | P | V | I | F | K | Q | R | L | K | R | F | G |   |   |   |   |
| <i>D. immitis</i> NPR-4      | C | F | T | S | A | T | I | P | I | T | A | F | K | K | E | W | I | F | G | A | V | L | C | S | I | A | P | F | I | A | G | A | S | L | C | F | S | T | F | T | L | S | A | I | S | V | D | R | F | L | L | I | F   | P | T | R | K | A | L | S | R | L | Q | A | L | I | V | I | M | V | I | C | I | L | S | T | S | L | S | A | P | V | I | F | K | Q | R | L | K | R | F |   |   |   |   |   |
| <i>O. volvulus</i> NPR-4     | C | F | T | S | A | T | I | P | I | T | A | F | K | K | E | W | I | F | G | A | V | L | C | S | I | A | P | F | I | A | G | A | S | L | C | F | S | T | F | T | L | S | A | I | S | V | D | R | F | L | L | I | F   | P | T | R | K | A | L | S | R | L | Q | A | L | I | V | I | M | V | I | C | I | L | S | T | S | L | S | A | P | V | I | F | K | Q | K | L | K | T | Y | A | N | Y |   |   |
| <i>O. ochengi</i> NPR-4      | C | F | T | S | A | T | I | P | I | T | A | F | K | K | E | W | I | F | G | A | V | L | C | S | I | A | P | F | I | A | G | A | S | L | C | F | S | T | F | T | L | S | A | I | S | V | D | R | F | L | L | I | F   | P | T | R | K | A | L | S | R | L | Q | A | L | I | V | I | M | V | I | C | I | L | S | T | S | L | S | A | P | V | I | F | K | Q | K | L | K | T | Y | A | N |   |   |   |
| <i>L. loa</i> NPR-4          | C | F | T | S | A | T | I | P | I | A | A | F | K | K | E | W | I | F | G | A | V | L | C | S | I | A | P | F | I | A | G | A | S | L | C | F | S | T | F | T | L | S | A | I | S | V | D | R | F | L | L | I | F   | P | T | R | K | A | L | S | R | L | Q | A | L | I | V | I | M | V | I | C | I | L | S | T | S | L | S | A | P | V | I | F | K | Q | R | L | K | R | F |   |   |   |   |   |
| <i>A. suum</i> NPR-4         | C | C | I | S | A | T | I | P | I | T | A | F | K | K | E | W | I | F | G | A | L | C | R | F | A | P | F | I | A | G | A | S | L | C | F | S | T | F | T | L | A | I | S | I | D | R | Y | L | L | I | R | F | P   | M | K | P | L | S | H | L | H | A | I | L | V | I | G | L | T | C | V | L | A | C | T | S | S | P | I | I | V | R | Q | K | I | G |   |   |   |   |   |   |   |   |   |   |
| <i>N. brasiliensis</i> NPR-4 | C | S | I | S | A | T | I | P | I | T | A | F | K | K | E | W | I | F | G | E | L | C | R | V | A | P | F | I | A | G | A | S | L | C | F | S | T | F | T | L | A | I | S | I | D | R | Y | L | L | I | R | F | P   | M | K | P | L | T | H | F | A | V | L | V | I | G | L | T | C | V | L | A | C | T | S | S | P | I | I | F | R | Q | K | I | G |   |   |   |   |   |   |   |   |   |   |   |
| <i>H. contortus</i> NPR-4    | C | S | I | S | A | T | I | P | I | T | A | F | K | K | E | W | I | F | G | E | L | C | R | V | A | P | F | I | A | G | A | S | L | C | F | S | T | F | T | L | A | I | S | I | D | R | Y | L | L | I | R | F | P   | M | K | P | L | T | H | F | A | V | L | V | I | G | L | T | C | V | L | A | C | T | S | S | P | I | I | F | R | Q | K | I | G |   |   |   |   |   |   |   |   |   |   |   |
| <i>C. elegans</i> NPR-4      | C | C | T | S | A | T | I | P | I | T | A | F | K | K | E | W | I | F | G | E | A | L | C | R | I | A | P | F | I | A | G | A | S | L | C | F | S | T | F | T | L | A | I | S | I | D | R | Y | L | L | I | R | F   | P | M | R | K | P | I | T | H | Y | O | A | V | G | V | I | A | I | C | A | F | A | A | T | T | S | P | I | M | F | K | Q | K | I | G |   |   |   |   |   |   |   |   |   |
| <i>S. ratti</i> NPR-4        | S | T | I | S | A | T | I | P | P | F | T | A | F | A | K | N | W | F | G | R | H | G | M | I | F | N | T | L | G | - | M | S | I | F | S | I | L | L | A | I | S | I | D | R | L | L | I | R | F | P | M | K | T</ |   |   |   |   |   |   |   |   |   |   |   |   |   |   |   |   |   |   |   |   |   |   |   |   |   |   |   |   |   |   |   |   |   |   |   |   |   |   |   |   |   |   |   |

*B. malayi* NPR-4 CTEEWGIDQ-SGRRVYGSIMLSVQFIVPLVIIIFTCYTAISFKLGK-----QRAAIKRRQRTNRMLIGMVVAFSASWFFSVLFN  
*W. bancrofti* NPR-4 CTEEWGIDQ-SGRRVYGSIMLSVQFIVPLVIIIFTCYTAISFKLGK-----QRAAIKRRQRTNRMLIGMVVAFSASWFFSVLFN  
*D. immitis* NPR-4 CTEEWGIDQ-SGRRVYGSIMLSVQFIVPLVIIIFTCYTAISFKLGK-----QRAAVKRRQRTNRMLIGMVVAFSASWFFSVLFN  
*O. volvulus* NPR-4 CTEEWGMDQ-SGRRVYGSIMLSVQFVPLMIITFCYTAISFKLGKGIILQRKLRQ-QNEWQLGMSDQAR-AAIKRRQRTNRMLIGMVVAFSASWFFSVLFN  
*O. ochengi* NPR-4 CTEEWGMDQ-SGRRVYGSIMLSVQFVPLMIITFCYTAISFKLGKGIILQRKLRQ-QNEWQLGMSDQARAAAIKRRQRTNRMLIGMVVAFSASWFFSVLFN  
*L. loa* NPR-4 CTEEWGIDQ-SGRRVYGSIMLSVQFIVPLVIIIFTCYTAISFKLGKGIILQRNRKH-HN-EWOLGMDTQQRAAIKRRQRTNRMLIGMVVAFSASWFFSVLFN  
*A. suum* NPR-4 CTEDWGMQ-SGRRVYGAIMVGVQFVPLTIIIVICYTAIAVKGQGLIKGKN--SNYDQVQVMTDQQRAAVRRRQRTNRMLIGMVVAFSASWLVSVLFN  
*N. brasiliensis* NPR-4 CTEDWSDNE-SQRKVVYGAALLCVQLVPLTIIIVVSYTAISLRIGQSMILRNTKRYATTNWNVQLTDQQRMAKRRQRTNRMLIAMVVAFSASWMMVSVTFN  
*H. contortus* NPR-4 CTEDWSDNE-SQRKVVYGAALLCVQLVPLTIIIVVSYTAISLRIGQSMILRNTKRDSSSNWNVQLTDQQRMAKRRQRTNRMLIAMVVAFSASWMMVSVTFN  
*C. elegans* NPR-4 CTENWGANESQRKIYGAALMFLQLVPLTIIIIISYTAISLRIGQSMILKGAKKQKTDNWEMLSDQORIAVKRRQRTNRMLIGMVVAFCSWIWSVTFN  
*S. ratti* NPR-4 CDENWGDKDSFRMYVSVLIYAVQFVPLTIIIIICYTLISLRINQSLLLKAK--NKNGWET---DQERVAVKRRARTNRMFIGMVVAFILSYLPNVVFVN  
*B. xylophilus* NPR-4 CFEDWGPYS-SQRRAYGTIVLSVQFIIPLSIIIIICYTAISVRLGQSMILKGGK--RDYQWOLQNDQHRAATKRRQRTNRMFIAMVVAFSLSWVSVVFN  
*G. pallida* NPR-4 CFEDWGSNE-LYRETYGTLIIIVQFFVPLIISICYIGISVRLSRNILLI---R--RKKMGNSWVHHRQSMADRRQRTNRMFIAMVIAFSLSWVSVLYN  
*M. hapla* NPR-4.1 CFEDWGEHM-GIRRIYGTLLIIVQFIIPLNFIIICCYTAISFRIGKGVN--LRTK-KKCEWQKIPSAQRNATKRRQRTNRMFIAMVIAFSSWVSVLYN  
*M. hapla* NPR-4.2 CFEHWSPEY-RLREYVGTILLIIVQFVPLIITIFCYTGISVRLNKSVELL-----RKKMGNTWQIYHOMANQRQRTNRMFVLMVVFVILLSWIWTVLFN  
*M. incognita* NPR-4 CFEDWGEIMI-GIRRIYGTLLIIVQFIIPLALITFCYTAISFRIGKGSVN--LRTR-KKCEWQMPISAQRNATKRRQRTNRMFIAMVIAFSSWVSVLYN

Consensus CTEDWG D S RRIYGSILLSVQFVPLVIITFCYTAISFKLGK ILLR K WNV L QQRAAIKRRQRTNRMLIGMVVAFSASWIWSVLFN

*B. malayi* NPR-4 VLRDYDCLPKWCQNQYFFGIATHCIAMSTVW-NPLLYAALNLQLRAAFRLLEPCVQRQPEMKSATYNCPL---LQSGSALRNDLTK-NKILNCDH  
*W. bancrofti* NPR-4 VLRDYDCLPKWCQNQYFFGIATHCIAMSTVW-NPLLYAALNLQLRAAFRLLEPCVQRQKVKQKSATYNCPL---LQSGSALRNDFTK-NKILNCDY  
*D. immitis* NPR-4 VLRDYDYLPEWCQDQYFFGIATHCIAMSTVW-NPLLYAALNLQLRAAFRLLEPCVQLQARKSTAHCNCKPL---LQSRSVLRNDFTK-NKILNCD-  
*O. volvulus* NPR-4 VLRDYDCLPQCQHQYFFGIATHCIAMSTVW-NPLLYAALNLQLRAAFRLLEPCVQRQQTQESTTVHSR-----KPLRDDFSK-NKILNIDR  
*O. ochengi* NPR-4 VLRDYDCLPQCQHQYFFGIATHCIAMSTVW-NPLLYAALNLQLRAAFRLLEPCVQRQQTQESTTVHSR-----KPLRDDFSK-NKILNYDR  
*L. loa* NPR-4 VLRDYDCLPEWCQDQYFFGIATHCIAMSTVW-NPLLYAALNLQLRAAFRLLEPCVQRREERKSATYNCPL---LQSRNVLRDDFTK-SKILNCDH  
*A. suum* NPR-4 VLRDYDRLPDWPKIQEYLYGIATHCIAMSTVW-NPLLYAVLNPQLRAAFIRLMPESCLQSTTTFERCDQLTRNGTLLLETGDRRSTKMQQNVRQALSSAP  
*N. brasiliensis* NPR-4 VLRDYDYLQVWKDQYELFGIATHCIAMSTVW-NPLLYAMLNLQLRAAFIELEPRVIRAKLRIGNDNASRLLNG--AAQPTLASSPSLYGSS-----  
*H. contortus* NPR-4 VLRDYDYLQVWKDQYELFGIATHCIAMSTVW-NPLLYAMLNLQLRAAFIELEPRVIRLRLRNDHSIRLING---SHHSIAAIPTLKYGSSVRFSSFS  
*C. elegans* NPR-4 VLRDYLYLPELTKTQEYIFGIATHCIAMSTVW-NPLLYAVLNLQLRAAFIDLMPHWLERHNLLEGDNSSPLLN-----HPTMTITN--KYGSTATKIVK  
*S. ratti* NPR-4 VLRDFNQVPKFISEQYFFGIVMHCIAMSTVW-NPLLYAALNYQLRAAFIDLMPACIHRKL-----  
*B. xylophilus* NPR-4 VFKDYELLPSVMEKEYIVGILSILHCIAMSTVW-NPLLYAMNQLRAAFIQLMPVCIKREYLYKEEHPMAQSCCKPRPSTLLTPNGNVQDSSLPSGCTT  
*G. pallida* NPR-4 VLRDYECLPPLVTRQEFFGILTHCIAMSTVW-NPLLYALLNLQLRAAFRLLEPESTKFKMAKRFDRIGSKSKLTAKDAKLMAPTLLMATFEQRKIVK  
*M. hapla* NPR-4.1 VLRDYDGLPNLVRDQEFFGILTHCIAMSTVW-NPILYALLNLQLRAAFQLVPEQCIKHSITCTCSKSNR-----LSGRSVAFCIYLEESQLIGSSV  
*M. hapla* NPR-4.2 VLRDFGLPEFISEQEFFLYGVIITHAIAMSTVW-NPILYALLNLQLRAAFNLNLPVIKRKLWLSKERSLNKLLAPAPSALYISSNKEIINNLPPRASSCL  
*M. incognita* NPR-4 VLRDYDGLPKFVHDQEFFGILTHCIAMSTVW-NPILYALLNLQLRAAFQLVPEQCIKHSITCTCSPNKG-----LSGRSVAFCAYLEESRLIGSSV

Consensus VLRDYD LP WI DQYFFGIATHCIAMSTVW NPLLYALLNLQLRAAFLLP L C I R L R R LL S

*B. malayi* NPR-4 RSCDLLAVYKAVNRYESFEVDDI-----  
*W. bancrofti* NPR-4 RKR-----  
*D. immitis* NPR-4 -----  
*O. volvulus* NPR-4 RKR-----

|                              |                                                                                                      |
|------------------------------|------------------------------------------------------------------------------------------------------|
| <i>O. ochengi</i> NPR-4      | R                                                                                                    |
| <i>L. loa</i> NPR-4          | R                                                                                                    |
| <i>A. suum</i> NPR-4         | GQYGATESSKGSFNVI IHLTTIGRDRYSRKFERCSFRSLVQRLSTKRENTSLVNNAHEFRYSQQYQILSNSTSSGSPITASQLINDCQQIQHSFIKRSI |
| <i>N. brasiliensis</i> NPR-4 | -----                                                                                                |
| <i>H. contortus</i> NPR-4    | YAFPQECSLLYHVNFELHYSNNVNFMWSTSNYSQSLY-----                                                           |
| <i>C. elegans</i> NPR-4      | ATYINTSNGQPYVSTSLVGKVQPEAPSFKFNNGSRRKKSAMMRILVQKRNAEEEEQLITKESPPPEIQMDTLCAASIIIPRRKSAQPRSTNEKVVLPKAS |
| <i>S. ratti</i> NPR-4        | -----                                                                                                |
| <i>B. xylophilus</i> NPR-4   | PENGLWLPAGFLKTGPRNSISSMASAFSSQPNGGLDDGTRLVQSTLTSTKYGAVESSENTRWSDEGFVDHGTVRLTTF-----                  |
| <i>G. pallida</i> NPR-4      | EIPNEPRQLKTDFLPKPRKFESRTNKSLCSSEGR-----                                                              |
| <i>M. hapla</i> NPR-4.1      | LFGASSHLQKRETGYGNKNCFNCLIGSSGSIIESSNETQKQMIAVRSAEKKRDDQIPVQKNFFQMC-----                              |
| <i>M. hapla</i> NPR-4.2      | LPLAHNKNEENYLKSSGDELFSSTTKSGTNLVSGSASVRSQSINLKSTRSVRGTGATISA-----                                    |
| <i>M. incognita</i> NPR-4    | LFGTTGQVQRRETNYENKNCFNCLIGSSRSVESSNETQKQTFSVKCEGNKGDAKILSHNHRHQLERI TADVGFDEQTWTEQLRKDSEDDALDDCNDL   |
| Consensus                    | R                                                                                                    |

|                              |                   |
|------------------------------|-------------------|
| <i>B. malayi</i> NPR-4       | -----             |
| <i>W. bancrofti</i> NPR-4    | -----             |
| <i>D. immitis</i> NPR-4      | -----             |
| <i>O. vovulus</i> NPR-4      | -----             |
| <i>O. ochengi</i> NPR-4      | -----             |
| <i>L. loa</i> NPR-4          | -----             |
| <i>A. suum</i> NPR-4         | SHLHNESANCPFIIRSY |
| <i>N. brasiliensis</i> NPR-4 | -----             |
| <i>H. contortus</i> NPR-4    | -----             |
| <i>C. elegans</i> NPR-4      | F-----            |
| <i>S. ratti</i> NPR-4        | -----             |
| <i>B. xylophilus</i> NPR-4   | -----             |
| <i>G. pallida</i> NPR-4      | -----             |
| <i>M. hapla</i> NPR-4.1      | -----             |
| <i>M. hapla</i> NPR-4.2      | -----             |
| <i>M. incognita</i> NPR-4    | RERDTERI-----     |
| Consensus                    |                   |

## 5. NPR-5 homologues

|                              |                                                                                                                                                                                                       |
|------------------------------|-------------------------------------------------------------------------------------------------------------------------------------------------------------------------------------------------------|
| <i>B. malayi</i> NPR-5       | -----M L I G I T N G S V L I A F T K N R R L R S A R N I F L L N L I                                                                                                                                  |
| <i>W. bancrofti</i> NPR-5    | -----M L I G I T N G S V L I A F I K N R R L R S A R N I F L L N L I                                                                                                                                  |
| <i>D. immitis</i> NPR-5      | -----M F I G I I G N G S V L I A F T K N R R L R S A R N I F L L N L I                                                                                                                                |
| <i>O. volvulus</i> NPR-5     | -----I K V I F W L Y G L L M I I G I T N G S V L I A F T K N R R L R S A R N I F L L N L I                                                                                                            |
| <i>O. ochengi</i> NPR-5      | -----I K V I F W L Y G L L M I I G I T N G S V L I A F T K N R R L R S A R N I F L L N L I                                                                                                            |
| <i>L. loa</i> NPR-5          | -----M F I G I T N G G V L I A F T K N R R L R S A R N I F L L N L I                                                                                                                                  |
| <i>A. suum</i> NPR-5         | -----V Q V A F S L V Y G A L M I V G L V G N G G V L F A V S K N K R L R S A R N I F L L N L I                                                                                                        |
| <i>A. caninum</i> NPR-5      | -----Q L F V K S A F T L Y G F L F I L G L V G N G G V F A M A N N R R L R S A R N I F L L N L I                                                                                                      |
| <i>N. brasiliensis</i> NPR-5 | -----T E N A T C I L V V D A I R S E G L D D V T T R L F V K S A F T L Y G L L F V L G L V G N G G V F A M A N N R R L R S A R N I F L L N L I                                                        |
| <i>H. contortus</i> NPR-5    | -----Q L F V K S A F T L Y G L L F I L G L V G N G G V F A M A N N R R L R S A R N I F L L N L I                                                                                                      |
| <i>C. elegans</i> NPR-5      | ---M V S S A A T I S T I S T T T P S T I S N V I T S H S N N G S C I Q I A E A I A A Q G I D D I T V D F Y I R S I F T F Y G F L F V L G I F G N G G V L W A V A R N K R L R S A R N I F L L N L I    |
| <i>S. ratti</i> NPR-5        | -----I R F L I T F T Y A L M I I G I F G N G G V T I V L K N K R L R N A R N I F L M N L M                                                                                                            |
| <i>B. xylophilus</i> NPR-5   | -----V Q A L F G L V Y L V L F V L G L V G N G G V F L A V L Q N K R L R S A R N I F L L N L I                                                                                                        |
| <i>G. pallida</i> NPR-5.1    | -----M D N E T N V Q T A K K E C I E V A E A I R A Q G I N D L A S W P S F Q S G F T I V Y G C L F L L G L L N G S V L L A F A Q N K R L R S A R N I F L L N L I                                      |
| <i>G. pallida</i> NPR-5.2    | -----M N Y S P Q Q K I E Q I P I S T D S K G N G S E Q Q I V V S G R M A S Q W Q P A E D C V H L S E V I T A H G I D D W T N N G S V L M A F G R A N R I R S T R N F F L L N L I                      |
| <i>M. hapla</i> NPR-5        | M A L I E E K Q Q H N L T P Q T S S Y I S P --- S S N N Q Q P V C T E V S E A I L S Q G I D D L T S W A A V Q C A I A A A Y G C L F L L G L L N G S V L L A F A Q N K R L R S T R N L F L L N L I     |
| <i>M. incognita</i> NPR-5    | M T L I E E K H Q N H L T P Q T S A Y H Q N E N I S P N N Q Q Q I V C T E V S E A I L A Q G I D D L T S W T A V Q C A I A A A Y G C L F L L G L L N G S V L L A F A Q N K R L R S T R N L F L L N L I |
| Consensus                    | V F <u>Y G L I L G I V G N G S V L I A F</u> K N R R L R S A R N I F L L N L I                                                                                                                        |

|                              |                                                                                                                                                                                                           |
|------------------------------|-----------------------------------------------------------------------------------------------------------------------------------------------------------------------------------------------------------|
| <i>B. malayi</i> NPR-5       | L T D L L L C V T A I P V T P W Y A L T K N W F G A L M C R L M P L S N S C S V F V T S W S L T A I A I D K F V H I I - G P I R A P V S I S Q A G L V T A F I W V V S T M I N I P Y L M S Y E L V D G     |
| <i>W. bancrofti</i> NPR-5    | L T D L L L C V T A I P V T P W Y A L T K N W F G A L M C R L M P L S N S C S V F V T S W S L T A I A I D K F V H I I - G P I R A P V S I S Q A G L V T A F I W V V S T M I N I P Y L M S Y E L V D G     |
| <i>D. immitis</i> NPR-5      | L T D L L L C V T A I P V T P W Y A L T K N W F G A L M C R L M P L S N S C S V F V T S W S L T A I A I D K F V H I I - G P I R A P V S I S Q A S L V T T F I W V V S T M I N I P Y L M S Y E L V D G     |
| <i>O. volvulus</i> NPR-5     | L T D L L L C V T A I P V T P W Y A L T K N W F G A L M C R L M P L S N S C S V F V T S W S L T A I A I D K F V H I I - G P I R A P V S I S Q A G L V T A F I W V I S T V I N I P Y L L S Y E L V D G     |
| <i>O. ochengi</i> NPR-5      | L T D L L L C V T A I P V T P W Y A L T K N W F G A L M C R L M P L S N S C S V F V T S W S L T A I A I D K F V H I I - G P I R A P V S I S Q A G L V T A F I W V I S T V I N I P Y L L S Y E L V D G     |
| <i>L. loa</i> NPR-5          | L T D L L L C V T A I P V T P W Y A L T K N W F G A L M C R L M P L S N S C S V F V T S W S L T A I A I D K F V H I I - G P I R A P V S I S Q A S L V T A F I W V V S T M I N I P Y L M S Y E L V D G     |
| <i>A. suum</i> NPR-5         | L T D I L L C V T A I P V T P W Y A L T K N W F G A L M C R L M P L S N S C S V F V T S W S L T A I A I D K F V H I I - D P T R A P V R V R Q A L I T L F I W L V C S L I N I P Y L M S Y D L V D G       |
| <i>A. caninum</i> NPR-5      | L T D L L L V L T A V P V T P W -----                                                                                                                                                                     |
| <i>N. brasiliensis</i> NPR-5 | L T D L L L V L T A V P V T P W Y A L T K N W Q F G S A M C H I M P L S N S C T I V F V T S W S L T A I S I D K Y L H I I - D P T K A P V T K R Q A L A I T L L I W L L S T L I N V P Y L L S Y E L V D G |
| <i>H. contortus</i> NPR-5    | L T D L L L V L T A V P V T P W Y A L T K N W Q F G S A M C H I M P L S N S C S V F V T S W S L T A I S I D K Y L H I I - D P T K A P V T V R Q A L I T L L I W L L S T L I N V P Y L L S Y E L V D G     |
| <i>C. elegans</i> NPR-5      | F T D L I L V F T A I P V T P W Y A M T K D W A F G S V M C H L V P L S N S C S V F V T S W S L T A I S L D K F L H I N - D P T K Q P V S I R Q A L A I T F L I W I V S T L I N I P Y L M S F E H V D G   |
| <i>S. ratti</i> NPR-5        | V T D L I L C C F G I P L T Y I Y A R E K K W T L G L I M C R I T P L G S N C A V F V S - W S I C A I A L D K F I H I V - N P I R Q P V S I K Q A T V I T V L I W I L S I L A N I P P I V N S D L K S G   |
| <i>B. xylophilus</i> NPR-5   | L T D I L L C L T G I P V T P W Y A L S K E W V F G S L M C R L M P L S N S C S V F V T S W S L T A I A I D K F M H I I - D P T R E Q F S M K L A G M V T V L I W A V S T C A N I P Y L M S E L V D G     |
| <i>G. pallida</i> NPR-5.1    | L T D I L L C L T A V P V T P W Y A L T K D W S F G S L M C R V V P L S N S C A V F V T S W S L T A I A I D K F M H I I - D L T R E Q F S L R T A G F V T F I I W T L S S L L N I P Y L L S Y E L V N G   |
| <i>G. pallida</i> NPR-5.2    | L T D V L L C F T A I P I T P C Y A V Q K N W V F G P V L C R F V P F C N S C A V F V T R - - - - A I A F D K H M H I V D P T R R R F R R L I G F V T L A I W L M S L V V N I P Y L L S F E L V Q G       |
| <i>M. hapla</i> NPR-5        | L T D I L L C L T A V P V T P W Y A L T K D W A F G P L M C R L V P L S N S C A V F V T S W S L C A I A L D K F L H I I - D P T R G Q F S L R T A A T I T F V I W I L S T L L N I P Y L L S Y K L V N G   |
| <i>M. incognita</i> NPR-5    | L T D I L L C L T A V P V T P W Y A L T K D W A F G P L M C R L V P L S N S C A V F V T S W S L C A I A L D K F L H I I - D P T R G Q F S L R T A A T I T F V I W I I S T L L N I P Y L L S Y K L V N G   |
| Consensus                    | L T D L L L C L T A I P V T P W Y A L T K N W F G A L M C R L M P L S N S C S V F V T S W S L T A I A I D K F V H I I D P T R A P V S I R Q A G L V T I W V V S T L I N I P Y L L S Y E L V D G           |

*B. malayi* NPR-5  
*W. bancrofti* NPR-5  
*D. immitis* NPR-5  
*O. volvulus* NPR-5  
*O. ochengi* NPR-5  
*L. loa* NPR-5  
*A. suum* NPR-5  
*A. caninum* NPR-5  
*N. brasiliensis* NPR-5  
*H. contortus* NPR-5  
*C. elegans* NPR-5  
*S. ratti* NPR-5  
*B. xylophilus* NPR-5  
*G. pallida* NPR-5.1  
*G. pallida* NPR-5.2  
*M. hapla* NPR-5  
*M. incognita* NPR-5

AYYVP--NNTAPFCGLFCDEINWNGEMPRLRYGSSVLLQ-FVIPLTIITYCYARILAKVASDMIQNVQFSKLSIAQREAEATNRRKR VNYILIGMVA  
AYYVP--NNTAPFCGLFCDEINWNGEMPRLRYGSSVLLQ-FVIPLTIITYCYARILVQVSDMIQNVQFSKLSIAQREAEATNRRKR VNYILIGMVA  
AYYVP--NNTIPFCGLFCDEINWNGEIPRLRYGSAVLLQ-FVIPLIITYCYARILAKVSSDMIQNVQFSKLSNAQREAEATNRRKR VNYILIGMVA  
AYYVP--NNTKPF CGFCDEINWNGEIPRLRYGSTVLLQ-FVIPLIITYCYARILAKVASDMIQNVQFSKLSSTAQREKATNRRKQ VNYILIGIVIA  
AYYVP--NNTKPF CGFCDEINWNGEIPRLRYGSTVLLQ-FVIPLIITYCYARILAKVASDMIQNVQFSKLSSTAQREKATNRRKQ VNYILIGIVIA  
AYYVP--NNTAPFCGLFCDEINWNGEIPRLRYGSAVLLQ-FVIPLTIITYCYARILAKVASDMIQNVQFRKLSSTAQREAEATNRRKR VNYILIGMVA  
AYYVP--ENATPFCGHFCDELNWQGEIPRLRYGSTVLLQ-FVPLAIITYCYSRILEKVAKDMIQNAQFSELSSTAQREAEATNRRKR VNYILIGMVVA  
-----TPYCGKFCDETNWQSENSRRLYGTMVMLLQ-FVIPMAIITYCYFRILRKVSKDMIQNVQFSASLSQKQRVDAISRKKK VNYILIGMVAT  
SYVVP--ENSTPFCGKFCDETNWQSENSRRLYGTMVMLLQ-FVIPMAIITYCYFRILRKVSKDMIQNVQFSASLSQKQRIDAI SRKKK VNYILIGMVAT  
SYVVP-----PYCGKFCDETNWQSENSRRLYGTMVMLLQFVIPMSIITYCYFRILRKVSKDMIQNVQFSASLSQKQRVDAISRKKK VNYILIGMVAT  
SFYVQ--PGETPYCGHFCDEANWQSENSRRLYGTMVMLLQ-FVVPMAVITYCYFRILQKVKSKDMIQNAQFCQSLTQKQRSDATSRKKK VNYILIAMVVT  
EATSSFEDNKPLCGVFCDEET-WDESTRQTYGLIALIFQ-FVVPMAIITYCYFRILRKVSKDMIQNVQFSASLSQKQRIDAI SRKKK VNYILIAMVLA  
AHFVP--VNSTPFCGHFCDETNWQSENSRRLYGTMVMLLQ-FVIPMSIITYCYFRILRKVSKDMIQNVQFSASLSQKQRIDAI SRKKK VNYILIAMVAT  
DYVVP--KNSTPFCGQFCDELNWQSGDTRRLYGTGMVLFQ-FVVPMAIITYCYFRILRKVSKDMIQNVQFSASLSQKQRIDAI SRKKK VNYILIAMVIA  
VYMASQDDAI TPFCDTFCDEFNWESESRQFYGAVVLLFQ-FVVPMAIITYCYFRILRKVSKDMIQNVQFSASLSQKQRIDAI SRKKK VNYILIAMVIA  
DYVVP--RNSTPFCGQFCDELNWQSGDTRRLYGTGMVLFQ-FVVPMAIITYCYFRILRKVSKDMIQNVQFSASLSQKQRIDAI SRKKK VNYILIAMVIA  
DYVVP--RNSTPFCGQFCDELNWQSGDTRRLYGTGMVLFQ-FVVPMAIITYCYFRILRKVSKDMIQNVQFSASLSQKQRIDAI SRKKK VNYILIAMVIA

Consensus AYYVP NNTPF CG FCDEINWNGEIPRLYGT VMLLQ FVIPLAIITYCY RIL KVAKDMIQNVQFS SLSNAQR DAINRKR VNYILIGMVA

*B. malayi* NPR-5  
*W. bancrofti* NPR-5  
*D. immitis* NPR-5  
*O. volvulus* NPR-5  
*O. ochengi* NPR-5  
*L. loa* NPR-5  
*A. suum* NPR-5  
*A. caninum* NPR-5  
*N. brasiliensis* NPR-5  
*H. contortus* NPR-5  
*C. elegans* NPR-5  
*S. ratti* NPR-5  
*B. xylophilus* NPR-5  
*G. pallida* NPR-5.1  
*G. pallida* NPR-5.2  
*M. hapla* NPR-5  
*M. incognita* NPR-5

FIGCWLPLTVVNLKDFKLEPLFLEQPFWPLLAHVIA MSTVIWNP LFFWLTKRKK-AHTQMPRFVSVF-NAFGTTISRISSMHRKSNAFRSTAWII  
FIGCWLPLTVVNLKDFKLEPLFLEQPFWPLLAHVIA MSTVIWNP LFFWLTKRKK-AQIQMPRFVSVF-NAFGTTISRISSMHRKSNAFRSTAYII  
FIGCWLPLTVVNLKDFS-----K-----AHVIA MSTVIWNP LFFWLTKRKK--KKSQMPRFVSVF-NAFGTTISRISSMHRKSNAFRSTAYII  
FIGCWFPLTVVNLKDFSKPEKFLKQPFWPLV-AHVIA MSTVIWNP LFFWLTKRKK--TKSQMPRFVSVF-NAFGTTISRISSMHRKSNAFRSTAYII  
FIGCWFPLTVVNLKDFSKPEKFLKQPFWPLV-AHVIA MSTVIWNP LFFWLTKRKK--TKSQMPRFVSVF-NAFGTTISRISSMHRKSNAFRSTAYII  
FIGCWLPLTVVNLKDFKLEPLFLEQPFWPLV-AHVIA MSTVIWNP LFFWLTKRKK-AHTQMPRFVSVL-NVFGTTISRISSMHRKSNAFRSTAYII  
FIGCWLPLTAVNLKDFSKPEKFLKQPFWPLV-AHVIA MSTVIWNP LFFWLTKRQ--KRPIIGRIIAS-DALTSFVSRINSIRRTS-----  
FIGCWLPLTAVNLKDYKIEPFLRAQPFWPLV-AHVIA MSTVIWNP LFFWLTKRQ--KRSGLSKIIN-----  
FIGCWLPLTAVNLKDYKIEPFLRAQPFWPLV-AHVIA MSTVIWNP LFFWLTKRQ--KRSGLSKIINSS-EVVASFASRLGNSLRMRSSRNSD---K  
FIGCWLPLTAVNLKDYKIEPFLRAQPFWPLV-AHVIA MSTVIWNP LFFWLTKRQ--KRSGLSKIIN-----  
FIGCWLPLTLNLKDFKKEPEFLKQPFWPLV-AHVIA MSTVIWNP LFFWLTKRQ--KRSGLSKIINSS-EIVSFASTRVNSIRRTSIFRRN----N  
FILCWFPITLYNITKDFSK---LHSQPFYGVV-FHSTAMSTVVLNPLFFWLTKRQ--KRSGLSKIIN-----  
FILCWFPITLYNITKDFQVEPAFMTAQPFLWPLV-AHVIA MSTVIWNP LFFWLTKRQ--SHLGGILHTS-EIITSLT SRMQSIRSTA--GDSVRLGS  
FIGCNTPITAVNLKDFKQEPFLKQPFWPLV-AHVIA MSTVIWNP LFFWLTKRQ--KRSGLSKIINSS-EIITSLT SRMQSIRSTA--GDSVRLGS  
FIGCNAPLTAVNLKDFGWEPEFLLRQPFWPLV-AHVIA MSTVIWNP LFFWLTKRQ--KRSGLSKIINSS-EIITSLT SRMQSIRSTA--GDSVRLGS  
FIGCNTPITAVNLKDFKQEPFLKQPFWPLV-AHVIA MSTVIWNP LFFWLTKRQ--KRSGLSKIINSS-EIITSLT SRMQSIRSTA--GDSVRLGS  
FIGCNTPITAVNLKDFKQEPFLKQPFWPLV-AHVIA MSTVIWNP LFFWLTKRQ--KRSGLSKIINSS-EIITSLT SRMQSIRSTA--GDSVRLGS

Consensus FIGCWLPLTVVNLKDFK EP FL QPFLWPLV AHVIA MSTVIWNP LFFWLTKR KRSQ L RIS S S ISRI SM R S

*B. malayi* NPR-5 WHRCIPESFDGTYCSMLNREPPSSRNDMOKSHLRNGLTNSKNYLTIEAERLI-----  
*W. bancrofti* NPR-5 WHRCIPESFDGTYCSTLNREPPSSRNDMPKSHLRNGLTNSKNYLTVEAERLI-----  
*D. immitis* NPR-5 ----YIFRYDDIYCSSLNRRSSNRSNSTKHLRNGSANSKNYLTVEMERLI-----  
*O. volvulus* NPR-5 -----  
*O. ochengi* NPR-5 -----  
*L. loa* NPR-5 ----YNSTYN--SAGTLNRESPNRNETPKSHLRNGLANTKNYLSVKTERLI-----  
*A. suum* NPR-5 ---TFRSQSS--ATTKVIKRQEAVDETPGSRTRPLLVTDGDRTSIARSASLSRTIL-----  
*A. caninum* NPR-5 -----  
*N. brasiliensis* NPR-5 TEKTKKRNGAVDSEVIVGCSATSRPLIIRAEIMTASS-----  
*H. contortus* NPR-5 -----  
*C. elegans* NPR-5 IDRVRKKQVVLDCGSS-YTTSSRPLLIRTDVQATLSNGSTSTTREML-----  
*S. ratti* NPR-5 -----  
*B. xylophilus* NPR-5 TRIRRRTPSEKCCSRN--NSVQSRPLIVSQTDNGITPTALLTKASSMENNML-----  
*G. pallida* NPR-5.1 KRMNKRALQLQRCEASGSRRTANGTSIRLGQSSALPLSQPLLLRENGHTATVHSRTDSSRNPSGMVEGRRSPLAKAYSLRANSVL-----  
*G. pallida* NPR-5.2 IRRLSRGELTAAEPNLGQQRERKNIPMVAHFNRKLLENGKMSSKDSVDSLVPVANSKMFDPGYERKLPKHAGENPSLVVFNRRRMSTNSNTF  
*M. hapla* NPR-5 RYKRRFGRKAARHLYRAESETTTS---RRPVLANGLTFSDSLRLNGYGGDTQWVRKNKLFKNNNYPLKG---SNASINYIPKWTSKI-----  
*M. incognita* NPR-5 RYKRRFGRKTARHLYRAESETTTSSTRRQILSNGLTFSDSL-----

Consensus

L GL

## 6. NPR-6 homologues

*T. spiralis* NPR-6 -----MVGIIIFNRRLOSVTN-FFICNLAV  
*T. muris* NPR-6 -----FVYLILYAFVLLMAFCCGNLLVYIIVMRRRLQNVTN-FFICNLAV  
*A. suum* NPR-6 -----RLVFGIAYMLIFTLAVS GNSLVVYVVV INNKTMQTVTN-IFITNLAI  
*C. elegans* NPR-6 -----MSNDLVPSVSSILNETTPSYQSTCKIKNNPMEMEYFPPFFISMYCAVFLVASSGNFLVYVVV TNKRMQITN-IFITNLAV  
*S. ratti* NPR-6 -----FVLYLFIYLLIFIVAVTGNLSLVYVVVTKKSMQTVTN-IFITNLAI  
*B. xylophilus* NPR-6 -----YTTVFLISFI GNATVVYVMVIRAKTTNVMN-LLITNLAV  
*G. pallida* NPR-6 -----AITDLVLTLSLFLIAYLSLFFVGLIGNFLVWVVVATC-----VFIANLAV  
*M. hapla* NPR-6 PYRRYYYRITDPPTCFQVAIAAMTIFYIFHHKFQALLSVAQARRLVALTDLLLT VLFMIAYPSLFFVGTVGNLLVWVVV SCCKMQTVTNVFIANLAV  
*M. incognita* NPR-6 -----PPTCS--PTLAIPIFYISHHKFQALLLVAQAKRCVLTDLLLT VLFMIAYPSLFFVGTVGNLLVWVVV NCKKMQTVTNVFIANLAV  
  
Consensus R LFLI Y IFLVA GN LVVYVVV KKMQTVTN IFI NLAV

*T. spiralis* NPR-6 SDLFLVTLTSLWLTTPMYGYLCKWIWGA VMCHSLPVIQ GASIFINSFTLTAIALDRYIVILNPFKKR-----MKMKVCFGLI LAIWI L SLLLV APYGFHMD  
*T. muris* NPR-6 SDLFLVSLTSLWLTTPMYGYLGRWIWGSVMCHSVPVIQ GASIFISSLT LTAIALDRYIVILNPFKKR-----MTVKVCLTIV I S IWLFS LMLV APYGLHMD  
*A. suum* NPR-6 SDLLVNFTSLWLTPLYTYT YGHWIWGGWLCYGLPLPFGQTSIFISLT LTAIALDRYIVIVHSSS-PNVNDHMSMQVCIAT I LIWT V SLLLV MPYAVHMR  
*C. elegans* NPR-6 SDLIVNFTSLWLTPLYTYS IGHWIFGGGLCHLPLPFGQTSIFISLT LTAIALDRYIVIVHSSN-ININDRMSMRSCLSFVLIWLC SLLLVTPYALNMK  
*S. ratti* NPR-6 SDLLVNFTSLWLTPLYTFLGRWIWGGWLCYGLPLPFGQTSIFISLT LTAIALDRYVICRHGAVINANDHISMHVSI-ITVIWAF SLLLVMPYALHMR  
*B. xylophilus* NPR-6 SDFLVCI TSLWLTPLYWYTGQMMWGTTCHEFFPLPQGLSICNSSMTLLVIAVDRYIVVCKNQDSYKAFNLTTKQCKFVIAF IWS IATLVM PYALNMK  
*G. pallida* NPR-6 SDLIVCCTSIWLTPYTYT YGHWIWGA VMCYALPLPFGASIFISSLT LTAIALDRHWVITSWANS-----PQVCAAVI CLIWCLS VLLVLPYAVHMR  
*M. hapla* NPR-6 SDLLVCFSSIWLTPLYTYT YGHWIWGGWLCYSLPLPFGASIFISSLT LTAIALDRYVVICLAPPNRSATOMHTSKQVCIAVI CLIWCVS ILLALPYAVHMR  
*M. incognita* NPR-6 SDLLVCFSSIWLTPLYTYT YGHWIWGGWLCYSLPLPFGASIFISSLT LTAIALDRYVVICLAPPNRSATOMHTSKQVCIAVI VLIWCVS ILLALPYAVHMR  
  
Consensus SDLLV FTSLWLTPLYTYT YGHWIWGGWLCYSLPLPFGASIFISSLT LTAIALDRYVVI R N MSMQVCIAVI LIW V SLLLVMPYAVHMR

*T. spiralis* NPR-6 LYH[A-ECDIYICRELWE-FHEFOAYGFSVMALQFGIPFLITVICYLRIWFHFKRKMVILQLK-SDQALORRKRLLKMLITMVAIFGLCWLFPFNILNLL  
*T. muris* NPR-6 LHYSPPQDFHICRELWE-FGELQAYGFTVMVLOFGIPFVIAVCYIRIWHHLCTRKSLVHLK-SDSALKRKRLLKMLIMVSI FGLCWLFPFNILNLL  
*A. suum* NPR-6 VTYIPRPFCEFWLCEDEWA-MEDLKS MYGVIMALQ-LVPPFVIGFSYIQIWNFLNNSMVSQRESEYENARKKRLLRMLIIMVVVFGICWLPFNILNLL  
*A. caninum* NPR-6 LTFITPEPCNFVWCGEDWS-MKRIKSLIYGVIMALQFIVPFVIGISYHSIWSFLNGRRRLTRER--AVETLRKKRLLRMLIIMVVIFAVCWFPFNILNLL  
*C. elegans* NPR-6 LNYIHEPCDFLICEDEWS-NAEFRSIFGIVMILQFVLPFLIAISYIKIWLFLNSRQSMTERK---SDLRKKRLLRMLIIMVVIFAI CWFPFNILNLL  
*S. ratti* NPR-6 LTKFKKPCCFWVCEAWA-MEDLKSAYGLVIMILQFIVPFVIGFSYIKIWKFLNRRKSLVTERESEIETORKKHLLRMLIIMVVIFAI CWFPFNILNLL  
*B. xylophilus* NPR-6 LKSSNLGHIYKCEDEWS-TGSTRAVYGLVVTMFOFVLPFLIFGFSYMKIFMFL-QRQCQESNNRLRVVSNKKNALFRMLFV MVVIFAVCWLEVNILNVM  
*G. pallida* NPR-6 IAEVMPPCRFSLCVEDWGGKEDMRSLYGVITVVLQFVVPFTVIGHSYRRIRWFMEARRLRQSE-SDVQLMRKRLLSMLVRMVLVFGICWLPFNILNLL  
*M. hapla* NPR-6 IAQVQWPCFSLCVEDWVDLEDLRSVYGVITAILQFVLPFAIIGRSYRLIWRFLIETRRAQLRPISEAQMNRKQRLRMLVRMVLVFGCCWLPFNILNLL  
*M. incognita* NPR-6 IAQVQWPCFSLCVEDWVDLEDLRSVYGVITAILQFVLPFAIIGRSYRLIWRFLIETRRAQLRPISEAQMNRKQRLRMLVRMVLVFGCCWLPFNILNLL  
  
Consensus L V PCDFWLCVEDWS MEDLRSVYGVIVMILQFIVPFVIGFSYIKIWF L RRSLL K SE LNRKKRLLRMLIIMVVIFGICWLPFNILNLL

*T. spiralis* NPR-6 RDMPSHEDGKSYFVFLFLVSHLIAMSSSSWNTVLYAWMNYHFNREFRPWHPGSWQMSQNKMTNCIKWLKRVTEAITTFLTLVETQILIDCMLQKHIIF  
*T. muris* NPR-6 RDLSPGAIDAKSYFVFLFLVSHLIAMSAAGWNPVLYAWMNDNFSREYRYIFYFLCGRK-----  
*A. suum* NPR-6 RDLHLDSSTKPYFSFLFLSAHVLSMTATCWNPIVYAWMNDAFREFRVAAVFL-----  
*A. caninum* NPR-6 RDLHWDDFIRP-HFSFTFLIVHLLSMTATCWNPIVYAWMNDSEFR-----  
*C. elegans* NPR-6 RDLKLDNEMRG-YFSEVFLSVHLLSMTATAWNPILYAFMNETFREEFKAVVPCLFARRPGTGPIRVITERTAMITNPFRRANRKKKVEEQPVTVISESPL  
*S. ratti* NPR-6 RDLRLDDGFKQ-YFPPLFTSHVLSMTATCWNPIVYAWMNESEFRKEFTHAIPFLQKHFQLNAKNNHRARVITDCQPALIRVNCKDNNKQK-----  
*B. xylophilus* NPR-6 RDLGLDQLILGRQGIWFNRAHMLSMTCVMVNPLIYAFMNHFRDEFCEVFP-----  
*G. pallida* NPR-6 RDLHADAFIKV---SFLFLFAHLLSMVVPAANPLIYAWMNASFRDGFRLRVLP-----  
*M. hapla* NPR-6 RDLRMDAWLKP---SFLFLLAHLLSMVVPAANPLIYAWMNASAFRESFLRALP-----  
*M. incognita* NPR-6 RDLRMDGWLK---SFLFLVSHLLSMVVPAANPLIYAWMNASAFRESFLRALP-----

Consensus RDL LD FIK YFSFLFLLAHLLSMTATAWNPILYAWMNDAFREEFLR LP

*T. spiralis* NPR-6 KKYCCKVLRLELNAQLLNGENAVNQWICQKPFYKMSKKFSSVKLKLII  
*T. muris* NPR-6 -----  
*A. suum* NPR-6 -----  
*A. caninum* NPR-6 -----  
*C. elegans* NPR-6 QTAVEPQRSIVYLDEPENGGSSCQTLLE-----  
*S. ratti* NPR-6 -----  
*B. xylophilus* NPR-6 -----  
*G. pallida* NPR-6 -----  
*M. hapla* NPR-6 -----  
*M. incognita* NPR-6 -----

Consensus

## 7. NPR-8 homologues

*T. spirallis* NPR-8 -----AEQCFL-----QNSGSEVGEN-FWKECLR-----QARFQLFTTFAAFFTAAYSICGVGLLSNGLLIYVLF  
*T. muris* NPR-8 -----AEKCFE-----ERGFPEHDDD-FWKACLRN-----LAITRVFTDVEATLFTVAYSILCGTGLLSNGLLIFVLF  
*A. suum* NPR-8 -----MFMSIDDIDAQCPRGIDKGVVTANERKAPFNLCLO-----LRRYSEWEEVYTAIYMVISVLAVINGGVVILAVI  
*C. elegans* NPR-8 MDFINELFFTDTDIEDLGMIMEVKDIDNYDRG---ISPNASNYLTPFDGLCLQK-FFYQLQTSLRRFTPYEEIYTYTIVYIISVAAVIGNGLVIMAVV  
*B. xylophilus* NPR-8 -----MFMSIDDIDRRCPRGINASLVSDTSLQAPFDDACLFOFTFFQRNAHLRKYNEWEEMLYTFLYFLISFFALVNGVIVLAVI  
*G. pallida* NPR-8 -----FLTVDLNRKCPRD-GLPAEDQQRWLSHPFDSCIR-SFFLGLSAQLRRYEHWEWFYIYAMALISALALIGNGMVILSVI  
*M. hapla* NPR-8 -----MFLSVEDIDRQCPR--AVNPNDTNNWQTFPDDCLKS-FFHKLTAHLRRYIYETAAYTSFYVLISICATIGNGLVILAVV  
*M. incognita* NPR-8 -----EMFLSVEDINROCPR--AVNPNDTNNWETFPDDNCLKS-FFHKLTAHLRRYIYETAAYTSFYVLISICATIGNGLVILAVV  
  
Consensus MFLSVDDIDRQCPR N W T PFDD CLR FF L A LRRYT WEE LYTAIYVLISI ALIGNGLVILAVI

*T. spirallis* NPR-8 ASLKRRNPGDVFTINLALSNFLLAALYIPFLWLPVNEGDFTHGLFFCKFANALPGSNIFCSTLTIAVMAVDRIYAVVNMNKQ--ISTRNNYFALLVAGL  
*T. muris* NPR-8 SDLKLRPSDVFLNLALSNFLLAALYIPFLWLPVNEGDFTHGLFFCFRANALPGSNICYSTLTI SVMAVDRYQVNMERHS--VSAQRHISVLVAGL  
*A. suum* NPR-8 RKRMRTRNRVLIIVNLALSNFLMLALTTIPFLWLP SIDDFEFLYSRFFCKFANALPGSNICYSTLTI SVMADRYYTVKMYAS--SHRROCLRAVCLISIL  
*C. elegans* NPR-8 RKRMRTRNRVLIIVNLALSNFLMLALTTIPFLWLP SIDDFEFLYSRFFCKFANVLPGSNIYCYSTLTI SVMADRYYSVKMKIAS--NRKQCFHAVLVSLA  
*B. xylophilus* NPR-8 RKRMRTRNRVLIIVNLALSNFLMLALTTIPFLWLP SIDDFEFLYSRFFCKFANALPGSNICYSTLTI SVMADRYYSVKQMNVG--TVNQTCVKGIIISVM  
*G. pallida* NPR-8 RKRMRTRNRVLIIVNLALSNFLMLALTTIPFLWLP SIDDFEFLYSRFFCKFANALPGSNICYSTLTI SVMADRYYSVRSLNISSSSARPGQCTRALFISFL  
*M. hapla* NPR-8 RKPAMRTARNVLIIVNLALSNFLMLALTTIPFLWLP SIDDFEFLYSRFFCKFANALPGSNICYSTLTI SVMADRYYSVRSIKVAGPSSRSGNCRALLISVL  
*M. incognita* NPR-8 RKPAMRTARNVLIIVNLALSNFLMLALTTIPFLWLP SIDDFEFLYSRFFCKFANALPGSNICYSTLTI SVMADRYYSVRSIKVAGPSSRSGNCRALLISVL  
  
Consensus RKR MRT RNVLIVNLALSNFLMLALTTIPFLWLP SIDDFEFLYSRFFCKFANALPGSNICYSTLTI SVMADRYYSVK MKVA S NCVRALLISVL

*T. spirallis* NPR-8 IWVVALALSLPYLLHYNLSFRFPLEIYARFNKTEE----IILFTTCTLRPQSCVDSGLNAED-----E-----KRCTEQVELVISILQAVFLYL  
*T. muris* NPR-8 IWLLAFALSLPYLLNYDLRIVVFPLEIYAQRFNKTEE----IVLFTSCALRPSSCIDSGLNPEE-----E-----KSCIQQVELVVSILQAVFLYA  
*A. suum* NPR-8 IWIISFLLSFPLLYYDTTMLYVFKDVTVFSSG-----NATKLSYGWQRCLAPTQRKGMEDPN--EAAKRESDAQKQVLFMSVMQALFLYV  
*C. elegans* NPR-8 IWIVSFILSLPPLLYYETSMLYVREIRVVDQS-----GQEVTRSYGWQRCLVVSAG-----RLPDITQSTQLLMSILQVAFLYI  
*B. xylophilus* NPR-8 IWVFSFLLSFPLLYYDTTMLYVFKDVMVYDSER-----NTITQLSYGWQRCLSPGGSAADDLNSIDADAQARMIQHFLQVMSLMQVFLFLYV  
*G. pallida* NPR-8 IWVFSFLLSFPLLYYRVEHLYVFKDIYKYDTSANGHSTSANFSSQIVLQSYGWSQCRISTG-----VQLGMAAMQAVMLYA  
*M. hapla* NPR-8 IW-----YYQINMLYVFKDVYVLKENIQ---SEGNSSSVELSYGWQRCL-----LGMSLMQALMLYA  
*M. incognita* NPR-8 IWVLSLLSFPLLYYQINMLYVFKDVYVLKEESK---SEGNSSSVELSYGWQRCLQ-----LGMSLMQALMLYA  
  
Consensus IWVLSFLLSFPLLYYDI MLYVFKDV V S SS LRSYGWQRCL Q VQLVMSLMQALFLYA

*T. spirallis* NPR-8 VPLLILVYCVKLTIFLHKADRRRLRLGRRKNHP-----PPP-----PPITASGG-----IIEAGPVKTPARSTR-----  
*T. muris* NPR-8 IPLIVLVVYCKLTHFLQNEQR---IKQQRGLTK-----DKL-----LGCALDKD-----GKLPSAGAHNRNR-----  
*A. suum* NPR-8 VPLIVLLIFNAKLTRFLQNSRQHRSLSDGRSDA-----GTLCLVKSSDLGQTAIVR-----NLPARRMNVKRR-----  
*C. elegans* NPR-8 VPLFVLSIFNVKLTIFLKTNAKNNKSKTRAPPKRFDRSDSHHNSLKNNNHTSSLRPS-----MPSIRSSITERNKINQRT-----  
*B. xylophilus* NPR-8 VPLVVLISIFNVKLTIFLKTNAKNNKRNRRNGTLRRES---VMIQCNKSNYAVKEPKKTRNALSLETEISTSTPPTPRVESATPERASDRRR-----

*G. pallida* NPR-8 VPLVVL<sup>S</sup>IFN<sup>M</sup>KL<sup>T</sup>RFL<sup>K</sup>MNA<sup>K</sup>Q<sup>L</sup>KQNSERECDSVG---VAMERR<sup>R</sup>Q<sup>R</sup>GGSKA<sup>S</sup>SMGGVTQRSS<sup>I</sup>ATSELMLPRQV<sup>S</sup>IVTIGAS<sup>S</sup>R<sup>A</sup>E<sup>K</sup>R<sup>S</sup>-----  
*M. hapla* NPR-8 VPLV<sup>V</sup>LLIFN<sup>L</sup>KL<sup>T</sup>RFL<sup>E</sup>KN<sup>S</sup>KN<sup>M</sup>N<sup>R</sup>L<sup>L</sup>PKVSI<sup>S</sup>ATQ<sup>Q</sup>NR<sup>V</sup>EK<sup>V</sup>DRRTSDNESL<sup>L</sup>CAEKL<sup>M</sup>ENSDG<sup>Q</sup>QKGANSTK<sup>V</sup>SS<sup>L</sup>VSGGAV<sup>S</sup>AVT<sup>T</sup>NNL<sup>R</sup>KSSGGA  
*M. incognita* NPR-8 VPLV<sup>V</sup>LLIFN<sup>L</sup>KL<sup>T</sup>RFL<sup>E</sup>KN<sup>S</sup>KN<sup>M</sup>N<sup>R</sup>L<sup>L</sup>PKISVSATQ<sup>Q</sup>NR<sup>V</sup>EK<sup>M</sup>DRRTSDNESL<sup>L</sup>CAEKL<sup>I</sup>ENSDG<sup>Q</sup>FKGANSTK<sup>S</sup>GS<sup>L</sup>VSGVAV<sup>S</sup>ST<sup>T</sup>NNL<sup>R</sup>KSSGGA

Consensus VPLV<sup>V</sup>LLIFN<sup>L</sup>KL<sup>T</sup>RFL NAKNMN L R V RS SS IV A A A T R R

*T. spirallis* NPR-8 -----AIK<sup>L</sup>L<sup>F</sup>AMA<sup>S</sup>SYA<sup>L</sup>V<sup>W</sup>MP<sup>F</sup>EVLS<sup>I</sup>Y<sup>T</sup>HL<sup>R</sup>SSHWTE<sup>D</sup>TV<sup>K</sup>VM<sup>R</sup>VD<sup>Q</sup>AF<sup>K</sup>L<sup>I</sup>TV<sup>L</sup>S<sup>I</sup>C<sup>I</sup>NP<sup>I</sup>LY<sup>G</sup>FL<sup>N</sup>KN<sup>L</sup>N<sup>K</sup>R-----  
*T. muris* NPR-8 -----AIK<sup>L</sup>L<sup>F</sup>AMA<sup>S</sup>SYA<sup>L</sup>V<sup>W</sup>MP<sup>F</sup>QGL<sup>S</sup>L<sup>F</sup>IS<sup>L</sup>RSSDWPED<sup>T</sup>VAF<sup>R</sup>RI<sup>D</sup>EAF<sup>K</sup>L<sup>I</sup>S<sup>M</sup>L<sup>S</sup>I<sup>C</sup>IN<sup>P</sup>V<sup>I</sup>Y<sup>G</sup>FM<sup>N</sup>KN<sup>L</sup>SKR-----  
*A. suum* NPR-8 ---NR-----TTALLIAMAGSYA<sup>L</sup>VL<sup>W</sup>LP<sup>F</sup>TV<sup>V</sup>S<sup>M</sup>LL<sup>D</sup>LR<sup>L</sup>LYMEGNAA<sup>V</sup>I<sup>E</sup>R<sup>I</sup>D<sup>Q</sup>S<sup>C</sup>K<sup>M</sup>I<sup>S</sup>I<sup>M</sup>S<sup>I</sup>C<sup>V</sup>NP<sup>F</sup>LY<sup>G</sup>FL<sup>N</sup>TN<sup>F</sup>RHE<sup>F</sup>T<sup>D</sup>I<sup>F</sup>NQ<sup>W</sup>I<sup>C</sup>YKLRTP  
*C. elegans* NPR-8 ---NR-----TTSLLIAMAGSYA<sup>L</sup>AL<sup>W</sup>FP<sup>F</sup>TL<sup>I</sup>T<sup>F</sup>LID<sup>F</sup>ELLINQDYVN<sup>-</sup>L<sup>V</sup>E<sup>R</sup>I<sup>D</sup>Q<sup>T</sup>C<sup>K</sup>M<sup>V</sup>S<sup>M</sup>L<sup>S</sup>I<sup>C</sup>V<sup>N</sup>P<sup>F</sup>LY<sup>G</sup>FL<sup>N</sup>TN<sup>F</sup>RHE<sup>F</sup>S<sup>D</sup>I<sup>Y</sup>Y<sup>R</sup>I<sup>R</sup>CETKSQ  
*B. xylophilus* NPR-8 ---NR-----TTMLLIAMAGSYA<sup>L</sup>VL<sup>W</sup>FP<sup>F</sup>TL<sup>V</sup>S<sup>M</sup>LID<sup>M</sup>DL<sup>L</sup>YLEN<sup>-</sup>GA<sup>A</sup>I<sup>E</sup>R<sup>I</sup>D<sup>Q</sup>S<sup>C</sup>K<sup>L</sup>I<sup>S</sup>I<sup>L</sup>S<sup>I</sup>G<sup>V</sup>NP<sup>F</sup>LY<sup>G</sup>FL<sup>N</sup>TN<sup>F</sup>RHE<sup>F</sup>T<sup>D</sup>I<sup>F</sup>NS<sup>L</sup>I<sup>R</sup>CSASQR  
*G. pallida* NPR-8 ---NR-----TTALLIAMAGSYA<sup>L</sup>VL<sup>W</sup>LP<sup>F</sup>TL<sup>V</sup>S<sup>I</sup>LID<sup>L</sup>D<sup>L</sup>W<sup>L</sup>G<sup>V</sup>ES<sup>-</sup>G<sup>S</sup>P<sup>I</sup>E<sup>R</sup>I<sup>D</sup>Q<sup>T</sup>C<sup>K</sup>L<sup>L</sup>S<sup>I</sup>T<sup>S</sup>I<sup>C</sup>V<sup>N</sup>P<sup>F</sup>LY<sup>G</sup>FL<sup>N</sup>TN<sup>F</sup>RHE<sup>F</sup>N<sup>E</sup>I<sup>F</sup>SY<sup>C</sup>LAWMPTLT  
*M. hapla* NPR-8 LINNQKRRNK<sup>T</sup>T<sup>T</sup>SLLIAMAGSYA<sup>L</sup>FL<sup>W</sup>FP<sup>F</sup>TL<sup>I</sup>S<sup>V</sup>LID<sup>L</sup>DL<sup>M</sup>VNI<sup>-</sup>---M<sup>E</sup>R<sup>V</sup>D<sup>Q</sup>A<sup>C</sup>K<sup>L</sup>I<sup>S</sup>I<sup>L</sup>S<sup>I</sup>C<sup>I</sup>NP<sup>F</sup>LY<sup>G</sup>FL<sup>N</sup>TN<sup>F</sup>R<sup>S</sup>E<sup>F</sup>N<sup>E</sup>I<sup>F</sup>I<sup>K</sup>C<sup>L</sup>I<sup>H</sup>C-----  
*M. incognita* NPR-8 LINN-----SLLIAMAGSYA<sup>L</sup>FL<sup>W</sup>FP<sup>F</sup>TL<sup>I</sup>S<sup>V</sup>LID<sup>L</sup>DL<sup>M</sup>VN<sup>-</sup>---M<sup>E</sup>R<sup>V</sup>D<sup>Q</sup>A<sup>C</sup>K<sup>L</sup>I<sup>S</sup>I<sup>L</sup>S<sup>I</sup>C<sup>V</sup>NP<sup>F</sup>LY<sup>G</sup>FL<sup>N</sup>TN<sup>F</sup>R<sup>S</sup>E<sup>F</sup>N<sup>E</sup>I<sup>F</sup>I<sup>K</sup>C<sup>L</sup>I<sup>H</sup>C-----

Consensus NR TTSLLIAMAGSYA<sup>L</sup>VL<sup>W</sup>FP<sup>F</sup>TL<sup>I</sup>S<sup>L</sup>LLID<sup>L</sup>DL<sup>L</sup> IIERIDQACKLISILSICVNPFLYGF<sup>L</sup>NTNFRHE<sup>F</sup> DIF I C

*T. spirallis* NPR-8 -----  
*T. muris* NPR-8 -----  
*A. suum* NPR-8 TNVQQEYSTIASPRRQSSSHSPQVSTSNRFLHLLQNPYVRRSSAPCSSFIRTSIARLT-----  
*C. elegans* NPR-8 PAGRFHHDVSSIAHHRQDSVYNDEATLLT<sup>T</sup>GRQSN<sup>G</sup>KDGSSSPI<sup>G</sup>FRSSV<sup>R</sup>VC<sup>S</sup>GQTKMIGDRIVLDDDDIEKDSFV  
*B. xylophilus* NPR-8 P-----  
*G. pallida* NPR-8 MREGRQRETSSSLGADRK-----  
*M. hapla* NPR-8 -----  
*M. incognita* NPR-8 -----

Consensus

## 8. NPR-10 homologues

*T. spiralis* NPR-10 MTRAEVESTLLLIKAPLVVNADSRQLLPAVSQNSCVEYSDYVVEIHKDITREGVWRGIFLICYLWIFLAGITGNVCVIISVARKASLQSVRNLFIVLSLSC  
*T. muris* NPR-10 -----CTDYGFFAYETYGDITREAWRGIIFIFVYVLIIVVAGITGNVSCVIIISVARKAFVLSVRNLFIVLSLSC  
*B. malayi* NPR-10 -----TQTPCVDINEYLWMMHSDLTSLLLPTMIFFAIYGLIILS-----LIR---HKSLQSVRNLFIISLSV  
*W. bancrofti* NPR-10 -----CVDINEYLWLNHSDLTSLLLPTMIVFAIYGLIIIQ-----SVRNLFIISLSV  
*A. suum* NPR-10 -----NTTPECIDIKEYLWKNQSDLTSLPSTMSVFAVLYSFIITLGLVIGNTLVVLSVIRHKSLQSVRNMFIIVLSV  
*C. elegans* NPR-10 -----MSSSNHCIDIRAYLWQTKHDLTLHPITAILLATIYTIIVVVGWITGNLLVVMVMRFVQLQSVRNMFIIVLSV  
*S. ratti* NPR-10 -----QMINESKVCKSVDNDLRENFNDVTTQPLIMIFISIFVYLLIIVVGVVGNLSLVIISVLQNKILQSVRNFIVALS  
*B. xylophilus* NPR-10 -----LSKSANCVDIKAFLWTSQGDLTSLPSTMLIFLIYGLVINGG--LVIIVLIIISVIRHKSLQSVRNLFIVLSLSC  
*G. pallida* NPR-10 -----KAYLWAGHSDVTSVLPVMLLFGLIYTTIIVTSLILGNLLVIFSVQCHRSLQSVR-----  
*M. hapla* NPR-10 -----MEQQPETAIDSIYSTQFVNTNDDKCIDIKEFLWTSNSSLTSLPIMVGF AFLYSAILVLTSLGNLLVILSVQYRSLQSVRNLFIVLSV  
*M. incognita* NPR-10 -----MEQQFINTEEDQCIDIKEFLWTSNSSLTSLPIMVGF AFLYSAILVLTSLGNLLVILSVQYRSLQSVRNLFIVLSV  
  
 Consensus CIDIKEYLW N SDLTSLP IM IF IY IIII ILGNLLVILSV HKSLQSVRNLFIVLSV

*T. spiralis* NPR-10 SDIVVCLTSLPITPITIIIRKNWLFGLPLCYIFPILLQCMSTIISTFTLMAIAIDRFILIIYPTKPIINRCHATTMIVAIWTLAISISIPMLLHYNLYKLPY  
*T. muris* NPR-10 SDIVVCLTSLPITPITIMKKNWLFGLPLCYIFPILLQCMSTIISTFTLMAIAIDRFILIIYPTKQPIQKRHAVAMTVSIWTLAGGISIPMLLHYNLYKLPY  
*B. malayi* NPR-10 TDIISIVSGTITPITAFSKIWLFGELLCYFIFLQFQASLCFSSLTLTAIAIDRFILIIIFPTKRPQKQRAIKIIGLDFALATAISLP-----MFI  
*W. bancrofti* NPR-10 TDIISIVSGTITPITAFSKIWLFGELLCYFIFLQFQASLCFSSLTLTAIAIDRFILIIIFHTKRPQKQAVKIIIGLNFALATAISLP-----MFI  
*A. suum* NPR-10 SDIVISIVSGSITPITAFTKIWLFGFELCYLVLPLQFQASLCFSTLTLMAIAIDRFILIIYPMKRPQKQVHALWMIALNITLATAISMP-----MFL  
*C. elegans* NPR-10 SDIFVAIVSGSVTPITAFSKVWLFGGPLCHLLPLLQGTAFSFTLTLTAIAIDRFILIIICHTPKPIRQDQALKMISFNATISVGLSVP-----LFM  
*S. ratti* NPR-10 SDIIVCVVSGSFTPISAFSKTWLFGFELCKKLVPLQGVSLFSTFILASTAVDRFILIIIFPTTQPISSKLAIVMISYIFIGSILTKP-----LYD  
*B. xylophilus* NPR-10 SDIVASLVSGSVTPISAFTKIWLFGFELCKKLVPLQGVSLCFSTLTLTAISIDRFILIIYPTKRSIQTKHALRMIALNCLLATSISLP-----MVF  
*G. pallida* NPR-10 -N-----MFAFSKIWLFGFELCKKLVPLQGVSLCFSTLTLTAISIDRFILIIYPTLRQSIQKRCACRIVALNSAIALIISLP-----MLF  
*M. hapla* NPR-10 SDIVICVSGTITPITAFTKIWPFGFELCKKWVPLQGVSLCFSTLTLTISVDRFILIIYPTLPSIQKCCACRIVALNCAIALAVSFP-----ILF  
*M. incognita* NPR-10 SDIVISVSGTITPITAFTKIWPFGQLCKKWVPLQGVSLCFSTLTLTISVDRFILIIYPTLKPISIQKCCACRIVALNCAIALAISTP-----ILF  
  
 Consensus SDIVISIVSGSITPITAFSKIWLFGELCYLVLPLIQGVSLCFSTLTLTAIAIDRFILIIYPTKPIQK ALRMIALN AIA AISLP M F

*T. spiralis* NPR-10 HDGNVTWVYCGYFCDETWPNLE--ARQAYGSIVLVLOFIIPLIVITFCYASISLRVGVKVALRQG-----  
*T. muris* NPR-10 ERKANHTIWCYGFCDETWPNVE--ARQIYGGAVLLLOFIIPLIVITFCYGGIFIQVIKGVAFKQTT-----  
*B. malayi* NPR-10 KORFIKYENFCGQFCTEDWSSDN--MGRSIIYGTIVVFIQFVAPLTIIFFCYTMISLKLTKTTLTKKQI-----  
*W. bancrofti* NPR-10 KORFIKYENFCGQFCTEDWSSDN--VGRSIIYGTIVVFIQFVAPLTIIFFCYTMISYR-----  
*A. suum* NPR-10 MOKLVDYGNFCGQFCTEDWGNNE--FGRSTYGTIVVFIQFVAPLTIIFFCYTMISLKLKGLLVKQAS-----  
*C. elegans* NPR-10 KOELMQFRNYCGEYCSFNWGPDA--YLRSVYGTIVVFIQFVAPLTIIFFCYTMISLKLKGLLVKQAS-----  
*S. ratti* NPR-10 ENTLESYKDYCGKICYEKWNGNE--DGRKRYGTIVVFIQFVAPLTIIFFCYTMISLKLKGLLVKQAS-----  
*B. xylophilus* NPR-10 KOKLVDYGFCCGQFCTEDWKEDT--FARSAYGTIVVFIQFVAPLTIIFFCYMMISIRLQGGILVKDRN-----  
*G. pallida* NPR-10 TOKLDTYDRFCGQFCSFYWDGELGAVARSAYGTIVVFIQFVAPLTIIFFCYMMISIRLQGGILVKDRN-----  
*M. hapla* NPR-10 NQTLVDYPPFCGQFCTEDWSSNSN--IQRSLYGTIVVFIQFVAPLTIIFFCYMMISIRLQGGILVKDRN-----  
*M. incognita* NPR-10 NQAMVDYPPFCGQFCTEDWSSNSN--IQRSLYGTIVVFIQFVAPLTIIFFCYMMISIRLQGGILVKDRN-----

Consensus QKLV\_Y FCGQFCTEDW ARS YGTVVFILQFVIPLIIITFCY MISIKL KGV VK S

*T. spiralis* NPR-10 -----GKMLLSNGAGAPDALLTRHVAALKRRQRTNRMLISMVAVFVACWFFQVLLNVLRDFNATPLAIASQPYLSSLIIVHCIAMSS  
*T. muris* NPR-10 -----DHRLLPMNGVSSEVILLRQMAIRRRQRTNRWMLISMVAVFVACWFFQVLLNVLRDFSAIPSPIAAQPYLFSLIIVHCIAMTS  
*B. malayi* NPR-10 -----FYRQQVLKRRRLRTNRMLIAMVGVFVCCWMPAVVFNFLRDYHWLPNFISQQEYLYLIGIITHCISMSS  
*W. bancrofti* NPR-10 -----QQ---VLKRRRLRTNRMLIAMVGVFVCCWMPAVVFNFLRDYHWLPNFVFSQ-EYLYLIGIITHCISMSS  
*A. suum* NPR-10 -----K-----HASGLG---TEQRRLALQRRLRTNRMLIAMVGVFVCCWMPAVVFNFLRDYHWLPSFVAQQEYLYLFGIITHCISMSS  
*C. elegans* NPR-10 -----K-----E-----LMSEARRQLTQRRLRTNRMLIIMTVTFALS~~W~~LPVSGFNFLRDYSALPGIIDSQDYLYLFGIIFHCISMIS  
*S. ratti* NPR-10 -----KNNR-QRTNRMLIAMVGVFVCCWMPAVVFNFLRDYQKLPITIQKQEYLYLFGIITHFISISS  
*B. xylophilus* NPR-10 -----T-----DQQQLTQQQSEQRK~~T~~ALKRRRLRTNRMLIAMVAVFVLCWTPAVLNFNFLRDYQWLPNVVARQEYLYLFGIITHCISMSS  
*G. pallida* NPR-10 GTEECTLLLTNGTND~~A~~HSGTPTGNHANDVLMAMEQKHALNRRRLRTNRMLIAMVAVFVCCWAPTVLNFNFLRDYQWLPK~~F~~VLSQEYLYLFGIITHCISMSS  
*M. hapla* NPR-10 GTDEGNSLYIN----EQKQNGMLMAGDGAMKVAMDQRKMVLSRRIRRTNRMLIAMVAVFVCCWAPSVIFNFLRDYQWLPK~~N~~VVAQEYLYLFGTSTHCLSMSS  
*M. incognita* NPR-10 GTDEGNSLYIN----EQKLQNGMLMAGDGAMKVAMDQRKMVLSRRIRRTNRMLIAMVAVFVCCWAPSVIFNFLRDYQWLP~~N~~FVIAQEYLYLFGTTHCLSISS

Consensus EQRK VLKRRRLRTNRMLIAMVAVFVCCW PSVLFNFLRDYQWLP FVAAQEYLYLFGIITHCISMSS

*T. spiralis* NPR-10 TLWNPILYAWLNDTFR~~T~~AFFYEILPFVSVLCCISKPAAMEG-RFRSDSIID-----  
*T. muris* NPR-10 TLWNPVLYAWLNE~~S~~FR~~T~~AFF~~E~~ILPCV~~R~~VLCCAKRPHINDFSLYRAASVAE-----  
*B. malayi* NPR-10 TLWNPCLYTL~~L~~NDQFRMAFLDL~~L~~HSFRIVP-----  
*W. bancrofti* NPR-10 TLWNPCLYTL~~L~~NDQFRMAFLDL~~L~~QSFRIV-----  
*A. suum* NPR-10 TLWNPCLYALLNEQFR~~L~~AFV~~D~~LLQYCRSGQKRCGTRYTDARCSRLVSNAPLANNSITEENIKLPNSV--  
*C. elegans* NPR-10 VLVNPFLYGYCNEHFR~~A~~AFAAL~~L~~DTVK~~A~~ACGMRRVSPGNPACSQLLSTHFESTTRRSVTTTIPSSI-----  
*S. ratti* NPR-10 TLWNPCLYALLNVQFR~~T~~AFFSQILGHTT~~S~~VTLNERNK~~N~~LEMK-----  
*B. xylophilus* NPR-10 TVWNPILYTMLNEQFR~~L~~AFAE~~F~~FKLCRPRKPR-GLRYKSANGSNESRTINTK~~L~~KSARFSNTPTI-----  
*G. pallida* NPR-10 TLWNPVLYALLNEQFR~~A~~AFSE~~Q~~FKQLRHRFCLPCRDSTNSGRNRLGTM~~D~~NNGSTSA~~A~~QQQSCRGSI~~R~~LVSIPTPSLIKFEH~~S~~VVR  
*M. hapla* NPR-10 TVWNPVLYALLNEQFR~~L~~AFSE~~I~~FKQIGNYFGIKQEMKVPQM~~Q~~GR~~L~~RRIKV~~K~~SDV~~K~~RGSEI-----  
*M. incognita* NPR-10 TVWNPILYALLNEQFR~~L~~AFSE~~I~~FKQISNYLGIKKERKMLHM~~Q~~GLKRIK~~V~~RS~~D~~VQ~~R~~GSEAI-----

Consensus TVWNPILYALLNEQFR~~L~~AFSEIL IR

## 9. NPR-11 homologues

|                               |                                                                                                                                                                                                                                              |
|-------------------------------|----------------------------------------------------------------------------------------------------------------------------------------------------------------------------------------------------------------------------------------------|
| <i>B. malayi</i> NPR-11       | -----N <sup>K</sup> V <sup>D</sup> C <sup>T</sup> VAKW <sup>K</sup> Y--LILQLC-----WCITAAAYVV                                                                                                                                                 |
| <i>W. bancrofti</i> NPR-11    | -----MNIW <sup>E</sup> Y--LILQLC-----WCITAAAYVV                                                                                                                                                                                              |
| <i>D. immitis</i> NPR-11      | -----Q <sup>L</sup> C-----WCITIAAYII                                                                                                                                                                                                         |
| <i>O. volvulus</i> NPR-11     | -----MKDDCDEWREIF <sup>T</sup> FR <sup>I</sup> DSYFR <sup>D</sup> DI <sup>V</sup> LEGE <sup>T</sup> EYSKTCIFQLC-----WCITVAYYII                                                                                                               |
| <i>O. ochengi</i> NPR-11      | -----FIEVSLKITYFRSLKRRNFWDIMNLTSM <sup>E</sup> KKN <sup>E</sup> YSKTCIFQLC-----WCITVAYYII                                                                                                                                                    |
| <i>L. loa</i> NPR-11          | -----MPSIRMKDNCDEWRQIF <sup>T</sup> FR <sup>I</sup> DSYFR <sup>D</sup> DI <sup>V</sup> LEGE <sup>T</sup> IN <sup>H</sup> ---ASAQLC-----WCITVAYYVV                                                                                            |
| <i>A. suum</i> NPR-11         | -----MPNSTLAEKDCNQWQHMFSE <sup>I</sup> NSYFR <sup>N</sup> EI <sup>V</sup> LEGE <sup>T</sup> DH <sup>-</sup> ---ASVELC-----WCITFAYCF                                                                                                          |
| <i>A. caninum</i> NPR-11      | -----                                                                                                                                                                                                                                        |
| <i>N. brasiliensis</i> NPR-11 | -----NETCEHYQNLFSR <sup>I</sup> NH <sup>Y</sup> FR <sup>D</sup> DI <sup>V</sup> LDGA <sup>E</sup> HA <sup>-</sup> ---SKELC-----YAITAAAYLV                                                                                                    |
| <i>H. contortus</i> NPR-11    | -----NETCEHWQSLFGR <sup>I</sup> NH <sup>Y</sup> FR <sup>D</sup> DI <sup>V</sup> INGTEHASKKVG-----YAITAAAYLV                                                                                                                                  |
| <i>C. elegans</i> NPR-11      | -----MGSVNESCDNYVEI <sup>F</sup> NK <sup>I</sup> NYFR <sup>D</sup> DI <sup>V</sup> INGTEYS <sup>-</sup> ---PKEFC-----YFIFTAYML                                                                                                               |
| <i>S. ratti</i> NPR-11        | -----SCAQAEVEFK <sup>L</sup> NY <sup>F</sup> VDEP <sup>L</sup> I <sup>A</sup> NHKRAPG-----VI <sup>I</sup> AFAYSM                                                                                                                             |
| <i>B. xylophilus</i> NPR-11   | -----MADPNRSNSSEPSEARTCAQWERLFSAT <sup>N</sup> H <sup>Y</sup> FR <sup>D</sup> DI <sup>V</sup> LQGE <sup>S</sup> EHS <sup>S</sup> SVESG-----YVVAAYVL                                                                                          |
| <i>G. pallida</i> NPR-11      | -----MSGDGMTPNRTGQQNCGELET <sup>L</sup> FDG <sup>N</sup> E <sup>F</sup> FR <sup>E</sup> ET <sup>L</sup> LQGE <sup>S</sup> EHS <sup>S</sup> ILASPRESEELMNF <sup>G</sup> IFQLGNL <sup>L</sup> LSAY <sup>L</sup> L                              |
| <i>M. hapla</i> NPR-11        | MSDVLDINAYNNSENDASYKVASSILILSEQPQLQE <sup>N</sup> QVKS <sup>C</sup> CHEMET <sup>L</sup> FSGL <sup>I</sup> NN <sup>F</sup> FR <sup>D</sup> DI <sup>V</sup> LKES <sup>E</sup> HSS <sup>E</sup> SELV <sup>G</sup> -----II <sup>I</sup> FTAYLL   |
| <i>M. incognita</i> NPR-11.1  | -----                                                                                                                                                                                                                                        |
| <i>M. incognita</i> NPR-11.2  | MNSVLDINTYNSK-----NGNTSSIIILSEHSQQQE <sup>Q</sup> -KLEK <sup>C</sup> CHEMEAL <sup>L</sup> FSGL <sup>I</sup> NN <sup>F</sup> FR <sup>D</sup> DI <sup>V</sup> LKES <sup>E</sup> HSS <sup>E</sup> SEL <sup>L</sup> G-----NL <sup>L</sup> FTAYLL |

Consensus

C LF IN YFRDD VL TEHS G W IT AYIL

|                               |                                                                                                                                                                                                                                                                                                                                                                                                     |
|-------------------------------|-----------------------------------------------------------------------------------------------------------------------------------------------------------------------------------------------------------------------------------------------------------------------------------------------------------------------------------------------------------------------------------------------------|
| <i>B. malayi</i> NPR-11       | VILFGAFGNMLTIIAVLYNPQIR <sup>T</sup> TRNFFILNLALSDF <sup>F</sup> ICTI <sup>A</sup> APIT <sup>F</sup> YTVLY <sup>I</sup> FW <sup>P</sup> FG <sup>L</sup> AMCK <sup>I</sup> TG <sup>S</sup> LLG <sup>F</sup> GIFLSTF <sup>S</sup> IAAIALDR <sup>C</sup> VVI <sup>I</sup> FP <sup>T</sup> K <sup>R</sup> K                                                                                             |
| <i>W. bancrofti</i> NPR-11    | VILFGAFGNMLTIFAVLYNPQIR <sup>T</sup> TRNFFILNLALSDF <sup>F</sup> ICTI <sup>A</sup> APIT <sup>F</sup> YTVLY <sup>I</sup> FW <sup>P</sup> FG <sup>L</sup> AMCK <sup>I</sup> TG <sup>S</sup> LLG <sup>F</sup> GIFLSTF <sup>S</sup> IAAIALDR <sup>C</sup> VVI <sup>I</sup> FP <sup>T</sup> K <sup>R</sup> K                                                                                             |
| <i>D. immitis</i> NPR-11      | VILFGTFGNMLTIIAVLYNPQIR <sup>T</sup> TRNFFILNLALSDF <sup>F</sup> ICTI <sup>A</sup> APIT <sup>F</sup> YTVLY <sup>I</sup> FW <sup>P</sup> FG <sup>L</sup> TMCK <sup>I</sup> TG <sup>S</sup> LLG <sup>F</sup> GIFLSTF <sup>S</sup> IAAIALDR <sup>C</sup> VVI <sup>I</sup> FP <sup>T</sup> K <sup>R</sup> K                                                                                             |
| <i>O. volvulus</i> NPR-11     | VILFGTFGNMLTIIAVAYNPQIR <sup>T</sup> TRNFFILNLALSDF <sup>F</sup> ICTI <sup>A</sup> APIT <sup>S</sup> YTVLY <sup>T</sup> FW <sup>P</sup> FG <sup>L</sup> TMCK <sup>I</sup> TG <sup>S</sup> LLG <sup>F</sup> GIFLSTF <sup>S</sup> IAAIALDR <sup>-</sup> VVI <sup>I</sup> FP <sup>T</sup> K <sup>R</sup> K                                                                                             |
| <i>O. ochengi</i> NPR-11      | VILFGTFGNMLTIIAVLYNPQIR <sup>T</sup> TRNFFILNLALSDF <sup>F</sup> ICTI <sup>A</sup> APIT <sup>S</sup> YTVLY <sup>T</sup> FW <sup>P</sup> FG <sup>L</sup> TMCK <sup>I</sup> TG <sup>S</sup> LLG <sup>F</sup> GIFLSTF <sup>S</sup> IAAIALDR <sup>-</sup> VVI <sup>I</sup> FP <sup>T</sup> K <sup>R</sup> K                                                                                             |
| <i>L. loa</i> NPR-11          | VILFGTFGNMLTIIAVLYNPQIR <sup>T</sup> TRNFFILNLALSDF <sup>F</sup> ICTI <sup>A</sup> TAPIT <sup>S</sup> YTVLY <sup>T</sup> FW <sup>P</sup> FG <sup>L</sup> AMCK <sup>I</sup> TG <sup>S</sup> LLG <sup>F</sup> GIFLSTF <sup>S</sup> IAAIALDR <sup>V</sup> VVI <sup>I</sup> FP <sup>T</sup> K <sup>R</sup> K                                                                                            |
| <i>A. suum</i> NPR-11         | VIVFGALGNMLTIVLAVIR <sup>N</sup> PQMR <sup>T</sup> TRNFFI <sup>V</sup> NLALSDF <sup>F</sup> ICTI <sup>V</sup> TAPIT <sup>L</sup> YTVLY <sup>I</sup> FW <sup>P</sup> FG <sup>T</sup> ALCK <sup>I</sup> AGS <sup>L</sup> QGF <sup>N</sup> GIFLSTF <sup>S</sup> IAAIALDR <sup>V</sup> VVI <sup>I</sup> FP <sup>T</sup> K <sup>R</sup> K                                                                |
| <i>A. caninum</i> NPR-11      | -----LYMFWPFGTALCKIAGSLQGFNIFLSTF <sup>S</sup> IAAIALDR <sup>V</sup> VVI <sup>I</sup> FP <sup>T</sup> K <sup>R</sup> E                                                                                                                                                                                                                                                                              |
| <i>N. brasiliensis</i> NPR-11 | VIIIFGACGNFLTMLVVALNPTMR <sup>T</sup> TRNFFI <sup>F</sup> NLALSDF <sup>F</sup> VCTI <sup>T</sup> APMT <sup>L</sup> YTVLY <sup>M</sup> FW <sup>P</sup> FG <sup>T</sup> ALCKIAGS <sup>L</sup> QGF <sup>N</sup> IFLSTF <sup>S</sup> IAAIALDR <sup>V</sup> VVI <sup>I</sup> FP <sup>T</sup> K <sup>R</sup> E                                                                                            |
| <i>H. contortus</i> NPR-11    | VILFGACGNFLAMLVVV <sup>L</sup> NPTMR <sup>T</sup> ARNFFI <sup>F</sup> NLALSDF <sup>F</sup> VCTI <sup>V</sup> TAPMT <sup>L</sup> YTVLY <sup>M</sup> FW <sup>P</sup> FG <sup>T</sup> ALCKIAGS <sup>L</sup> QGF <sup>N</sup> IFLSTF <sup>S</sup> IAAIALDR <sup>V</sup> VVI <sup>I</sup> FP <sup>T</sup> K <sup>R</sup> E                                                                               |
| <i>C. elegans</i> NPR-11      | IILFGAIGNFLTIIIVVILN <sup>E</sup> AMR <sup>T</sup> TRNFFI <sup>L</sup> NLALSDF <sup>F</sup> VCTI <sup>V</sup> TAPMT <sup>L</sup> YTVLY <sup>M</sup> FW <sup>P</sup> FSRT <sup>L</sup> CKIAGS <sup>L</sup> QGF <sup>N</sup> IFLSTF <sup>S</sup> IAAIALDR <sup>V</sup> VVI <sup>I</sup> FP <sup>T</sup> K <sup>R</sup> E                                                                              |
| <i>S. ratti</i> NPR-11        | VILFGAFGNMLTIFI <sup>V</sup> L <sup>R</sup> NK <sup>S</sup> MRT <sup>V</sup> Q <sup>N</sup> FFI <sup>L</sup> NLALG <sup>D</sup> FM <sup>I</sup> CTI <sup>T</sup> APIT <sup>F</sup> FN <sup>L</sup> SE <sup>T</sup> FW <sup>K</sup> YGNALCK <sup>F</sup> VSS <sup>I</sup> GGFNIFLSTF <sup>S</sup> IAAIALDR <sup>F</sup> LV <sup>I</sup> FP <sup>T</sup> QQQ                                          |
| <i>B. xylophilus</i> NPR-11   | VISLGI <sup>F</sup> GNAL <sup>T</sup> IVAI <sup>L</sup> R <sup>N</sup> K <sup>Q</sup> M <sup>R</sup> N <sup>V</sup> R <sup>N</sup> FFI <sup>L</sup> NLALSDF <sup>F</sup> ICTI <sup>V</sup> TAPIT <sup>L</sup> YTVLY <sup>M</sup> FW <sup>P</sup> FG <sup>T</sup> ALCKIAGS <sup>L</sup> QGF <sup>N</sup> IFLSTF <sup>S</sup> IAAIALDR <sup>V</sup> VVI <sup>I</sup> FP <sup>T</sup> K <sup>R</sup> E |
| <i>G. pallida</i> NPR-11      | VIVFGTVGNLTI <sup>L</sup> AVL <sup>R</sup> NK <sup>Q</sup> MRT <sup>V</sup> R <sup>N</sup> FFI <sup>L</sup> NLALSDF <sup>F</sup> VCTI <sup>V</sup> TAPIT <sup>L</sup> YTVLY <sup>M</sup> FW <sup>P</sup> FG <sup>T</sup> ALCKIAGS <sup>L</sup> QGF <sup>N</sup> IFLSTF <sup>S</sup> IAAIALDR <sup>V</sup> VVI <sup>I</sup> FP <sup>T</sup> K <sup>R</sup> Q                                         |
| <i>M. hapla</i> NPR-11        | VIAFGSFGNLTIMAVL <sup>R</sup> NK <sup>Q</sup> MRT <sup>V</sup> R <sup>N</sup> FFI <sup>L</sup> NLALSDF <sup>F</sup> VCTI <sup>V</sup> TAPIT <sup>L</sup> YTVLY <sup>M</sup> FW <sup>P</sup> FSRT <sup>L</sup> CKIAGS <sup>L</sup> QGF <sup>N</sup> IFLSTF <sup>S</sup> IAAIALDR <sup>V</sup> VVI <sup>I</sup> FP <sup>T</sup> K <sup>R</sup> Q                                                      |
| <i>M. incognita</i> NPR-11.1  | -----RNFFILNLALSDF <sup>F</sup> VCTI <sup>V</sup> TAPIT <sup>L</sup> YTVLY <sup>M</sup> FW <sup>P</sup> FSRT <sup>L</sup> CKIAGS <sup>L</sup> QGF <sup>N</sup> IFLSTF <sup>S</sup> IAAIALDR <sup>V</sup> VVI <sup>I</sup> FP <sup>T</sup> K <sup>R</sup> Q                                                                                                                                          |
| <i>M. incognita</i> NPR-11.2  | VIAFGSIGNLTI <sup>M</sup> AVL <sup>R</sup> NK <sup>Q</sup> MRT <sup>V</sup> R <sup>N</sup> FFI <sup>L</sup> NLALSDF <sup>F</sup> VCTI <sup>V</sup> TAPIT <sup>L</sup> YTVLY <sup>M</sup> FW <sup>P</sup> FSRT <sup>L</sup> CKIAGS <sup>L</sup> QGF <sup>N</sup> IFLSTF <sup>S</sup> IAAIALDR <sup>V</sup> VVI <sup>I</sup> FP <sup>T</sup> K <sup>R</sup> Q                                         |

Consensus

VILFGAFGNMLTIIAVL NPQMR<sup>T</sup>TRNFFI<sup>L</sup>NLALSDF<sup>F</sup>ICTI<sup>T</sup>APIT<sup>L</sup>YTVLY<sup>M</sup>FW<sup>P</sup>FG ALCKIAGS<sup>L</sup>QGF<sup>N</sup>IFLSTF<sup>S</sup>IAAIALDR<sup>V</sup>VVI<sup>I</sup>FP<sup>T</sup>K<sup>R</sup>

*B. malayi* NPR-11 RQHNLA<sup>LL</sup>FL<sup>LI</sup>W<sup>VI</sup>SI<sup>IT</sup>LAL<sup>PL</sup>LL<sup>IT</sup>SDLN<sup>TV</sup>FDD<sup>DK</sup>CG<sup>IS</sup>LK<sup>IC</sup>HE<sup>KNE</sup>IWN<sup>LMP</sup>ISK<sup>RAY</sup>TLAV<sup>LL</sup>TQ<sup>YA</sup>LPL<sup>I</sup>SIV<sup>FAY</sup>STIAM<sup>KM</sup>QIR<sup>MNS</sup>RRLA-  
*W. bancrofti* NPR-11 RQHNLA<sup>LL</sup>FL<sup>LI</sup>W<sup>VI</sup>SI<sup>IT</sup>LAL<sup>PL</sup>LL<sup>IT</sup>SDLN<sup>TV</sup>FDD<sup>DK</sup>CG<sup>IS</sup>LK<sup>IC</sup>HE<sup>KNE</sup>IWN<sup>LMP</sup>ISK<sup>RAY</sup>TLAV<sup>LL</sup>TQ<sup>YA</sup>LPL<sup>I</sup>SIV<sup>FAY</sup>STIAM<sup>KM</sup>QIR<sup>MNS</sup>RRLA-  
*D. immitis* NPR-11 RQHNLA<sup>LL</sup>FL<sup>LI</sup>W<sup>VI</sup>SI<sup>IT</sup>LAL<sup>PL</sup>LL<sup>IT</sup>SDLN<sup>TV</sup>YED<sup>DK</sup>CG<sup>Y</sup>Y<sup>LE</sup>IC<sup>HE</sup>KNE<sup>IWN</sup>LMP<sup>ISK</sup>RAY<sup>TL</sup>GV<sup>LL</sup>TQ<sup>YA</sup>LPL<sup>I</sup>SIV<sup>FAY</sup>STIAM<sup>RM</sup>QIR<sup>MNS</sup>RRLA-  
*O. volvulus* NPR-11 RQHNLA<sup>LL</sup>FL<sup>LI</sup>W<sup>VI</sup>SI<sup>IT</sup>LAL<sup>PL</sup>LL<sup>IT</sup>SDLN<sup>TV</sup>FED<sup>DK</sup>CG<sup>IS</sup>LK<sup>IC</sup>HE<sup>KNE</sup>IW<sup>--</sup>MP<sup>ISK</sup>RAY<sup>TL</sup>AV<sup>LL</sup>TQ<sup>YA</sup>LPL<sup>I</sup>SIV<sup>FAY</sup>STIAM<sup>RM</sup>QIR<sup>----</sup>  
*O. ochengi* NPR-11 RQHNLA<sup>LL</sup>FL<sup>LI</sup>W<sup>VI</sup>SI<sup>IT</sup>LAL<sup>PL</sup>LL<sup>IT</sup>SDLN<sup>TV</sup>FED<sup>DK</sup>CG<sup>IS</sup>LK<sup>IC</sup>HE<sup>KNE</sup>IWN<sup>-</sup>MP<sup>ISK</sup>RAY<sup>TL</sup>AV<sup>LL</sup>TQ<sup>YA</sup>LPL<sup>I</sup>SIV<sup>FAY</sup>STIAM<sup>RM</sup>QIR<sup>M----</sup>  
*L. loa* NPR-11 RQHNLA<sup>LL</sup>FL<sup>LI</sup>W<sup>VI</sup>SI<sup>IT</sup>LAL<sup>PL</sup>LL<sup>IT</sup>SDLN<sup>TV</sup>FDD<sup>DK</sup>CG<sup>IS</sup>LK<sup>IC</sup>HE<sup>KNE</sup>IWN<sup>LMP</sup>ISK<sup>RAY</sup>TLAV<sup>LL</sup>TQ<sup>YA</sup>LPL<sup>I</sup>SIV<sup>FAY</sup>STIAM<sup>KM</sup>QIR<sup>MNS</sup>RRLA-  
*A. suum* NPR-11 RQHNLS<sup>LL</sup>FF<sup>SL</sup>IW<sup>LI</sup>SI<sup>AL</sup>AL<sup>PL</sup>LL<sup>IAS</sup>DLN<sup>TI</sup>FED<sup>HNC</sup>DIS<sup>LQ</sup>IC<sup>HE</sup>KNE<sup>IW</sup>Q<sup>QMP</sup>IG<sup>KE</sup>AY<sup>TL</sup>AV<sup>LV</sup>TQ<sup>YA</sup>LPL<sup>I</sup>SIV<sup>FAY</sup>TRIA<sup>HR</sup>M<sup>Q</sup>Q<sup>QF</sup>AIR<sup>MS</sup>-  
*A. caninum* NPR-11 RQ<sup>Q</sup>NLS<sup>LM</sup>FF<sup>V</sup>IW<sup>V</sup>LS<sup>L</sup>IL<sup>AV</sup>PL<sup>LI</sup>AS<sup>DL</sup>N<sup>TI</sup>YED<sup>PV</sup>CE<sup>IS</sup>L<sup>R</sup>IC<sup>HE</sup>Q<sup>ND</sup>IW<sup>Q</sup>TMM<sup>ISK</sup>Q<sup>T</sup>Y<sup>TL</sup>SV<sup>LV</sup>TQ<sup>YA</sup>FP<sup>LF</sup>SL<sup>V</sup>FAY<sup>TR</sup>IA<sup>HR</sup>M<sup>K</sup>LR<sup>FAN</sup>R---  
*N. brasiliensis* NPR-11 RQ<sup>Q</sup>KL<sup>SL</sup>M<sup>FF</sup>V<sup>I</sup>W<sup>V</sup>LS<sup>L</sup>IL<sup>AV</sup>PL<sup>LI</sup>AS<sup>DL</sup>N<sup>TI</sup>FV<sup>E</sup>P<sup>SC</sup>G<sup>IS</sup>L<sup>R</sup>IC<sup>HE</sup>Q<sup>ND</sup>IW<sup>Q</sup>TMM<sup>ISK</sup>Q<sup>T</sup>Y<sup>TL</sup>SV<sup>LV</sup>TQ<sup>YA</sup>FP<sup>LF</sup>SL<sup>V</sup>FAY<sup>TR</sup>IA<sup>HR</sup>M<sup>K</sup>LR<sup>FAN</sup>R---  
*H. contortus* NPR-11 RQ<sup>Q</sup>NLS<sup>LM</sup>FF<sup>V</sup>LI<sup>W</sup>V<sup>SL</sup>VL<sup>AV</sup>PL<sup>LI</sup>AS<sup>DL</sup>N<sup>TI</sup>YED<sup>SS</sup>CD<sup>IS</sup>L<sup>R</sup>IC<sup>HE</sup>Q<sup>NE</sup>IW<sup>Q</sup>-MM<sup>ISK</sup>R<sup>T</sup>Y<sup>TL</sup>SV<sup>LV</sup>TQ<sup>YA</sup>FP<sup>LF</sup>SL<sup>V</sup>FAY<sup>TR</sup>IA<sup>HR</sup>M<sup>K</sup>LR<sup>FAN</sup>R---  
*C. elegans* NPR-11 RQ<sup>Q</sup>NLS<sup>FC</sup>FF<sup>I</sup>W<sup>V</sup>LS<sup>L</sup>IL<sup>AV</sup>PL<sup>LI</sup>AS<sup>DL</sup>TP<sup>V</sup>FV<sup>E</sup>P<sup>SC</sup>DL<sup>AL</sup>Y<sup>IC</sup>HE<sup>Q</sup>NE<sup>I</sup>W<sup>E</sup>K<sup>MI</sup>ISK<sup>GT</sup>Y<sup>TL</sup>AV<sup>LV</sup>TQ<sup>YA</sup>FP<sup>LF</sup>SL<sup>V</sup>FAY<sup>SR</sup>IA<sup>HR</sup>M<sup>K</sup>LR<sup>FAN</sup>R---  
*S. ratti* NPR-11 RQ<sup>K</sup>FF<sup>SI</sup>IL<sup>F</sup>AL<sup>I</sup>W<sup>I</sup>LS<sup>LL</sup>SI<sup>PI</sup>IV<sup>VS</sup>ST<sup>MF</sup>Y<sup>E</sup>VE<sup>F</sup>CN<sup>L</sup>TL<sup>YL</sup>CN<sup>E</sup>N<sup>E</sup>LAW<sup>DK</sup>MP<sup>SK</sup>LS<sup>YT</sup>IS<sup>LV</sup>I<sup>H</sup>Y<sup>AF</sup>PI<sup>VS</sup>M<sup>V</sup>FAY<sup>TK</sup>IAS<sup>RM</sup>HS<sup>R</sup>FV<sup>HR</sup>N--  
*B. xylophilus* NPR-11 RQ<sup>H</sup>NLS<sup>LL</sup>FF<sup>SL</sup>IW<sup>LI</sup>SI<sup>LL</sup>AL<sup>PL</sup>FD<sup>AS</sup>DL<sup>NI</sup>FQ<sup>DK</sup>NC<sup>G</sup>IS<sup>L</sup>T<sup>IC</sup>HE<sup>Q</sup>NE<sup>K</sup>W<sup>Q</sup>MA<sup>TK</sup>EV<sup>Y</sup>TV<sup>GV</sup>LV<sup>FV</sup>Q<sup>YA</sup>FP<sup>LT</sup>SI<sup>A</sup>FAY<sup>SR</sup>IAR<sup>RM</sup>GAR<sup>F</sup>AARN--  
*G. pallida* NPR-11 RQ<sup>Q</sup>RL<sup>SL</sup>M<sup>FF</sup>SM<sup>I</sup>W<sup>LA</sup>S<sup>ILL</sup>AA<sup>PL</sup>FL<sup>AA</sup>DL<sup>RP</sup>V<sup>FR</sup>D<sup>N</sup>RC<sup>Q</sup>IED<sup>LC</sup>SE<sup>Q</sup>NER<sup>W</sup>KEL<sup>S</sup>SK<sup>ES</sup>Y<sup>TL</sup>GV<sup>IL</sup>LQ<sup>YA</sup>FP<sup>LA</sup>IA<sup>F</sup>AY<sup>SR</sup>IAR<sup>RM</sup>GAR<sup>R</sup>ARG<sup>GS</sup>G  
*M. hapla* NPR-11 RQ<sup>Q</sup>NLS<sup>IF</sup>FS<sup>L</sup>IW<sup>LA</sup>S<sup>ILL</sup>AA<sup>PL</sup>FL<sup>AA</sup>DI<sup>SP</sup>I<sup>F</sup>H<sup>D</sup>V<sup>QC</sup>GI<sup>E</sup>L<sup>K</sup>LC<sup>NE</sup>Q<sup>NER</sup>W<sup>RE</sup>LL<sup>S</sup>KEA<sup>YT</sup>GG<sup>V</sup>IL<sup>LQ</sup>YL<sup>PL</sup>AS<sup>IA</sup>FAY<sup>SR</sup>IAR<sup>RM</sup>GAR<sup>K</sup>SC<sup>RC</sup>GS  
*M. incognita* NPR-11.1 RQ<sup>Q</sup>NLS<sup>IF</sup>FS<sup>L</sup>IW<sup>LA</sup>S<sup>ILL</sup>AA<sup>PL</sup>FL<sup>AA</sup>DI<sup>SP</sup>I<sup>F</sup>H<sup>D</sup>S<sup>QC</sup>GI<sup>E</sup>L<sup>N</sup>LC<sup>NE</sup>Q<sup>NER</sup>W<sup>K</sup>EL<sup>L</sup>IS<sup>KEA</sup>Y<sup>TV</sup>GV<sup>IL</sup>LQ<sup>YL</sup>PL<sup>AS</sup>IA<sup>F</sup>A<sup>-</sup>S<sup>R</sup>IAR<sup>RM</sup>GT<sup>SK</sup>S<sup>F</sup>RCAS  
*M. incognita* NPR-11.2 RQ<sup>Q</sup>NLS<sup>IF</sup>FS<sup>L</sup>IW<sup>LA</sup>S<sup>ILL</sup>AA<sup>PL</sup>FL<sup>AA</sup>DI<sup>TP</sup>I<sup>F</sup>H<sup>D</sup>S<sup>QC</sup>GI<sup>E</sup>L<sup>N</sup>LC<sup>NE</sup>Q<sup>NER</sup>W<sup>K</sup>EL<sup>M</sup>N<sup>KEA</sup>Y<sup>TV</sup>GV<sup>IL</sup>LQ<sup>YL</sup>PL<sup>AS</sup>IA<sup>F</sup>AY<sup>SR</sup>IAR<sup>RM</sup>GTR<sup>S</sup>CRYAN

Consensus RQ NLSLLFF LIWVISILLALPLLIASDLNTIFED CGISLKICHEQNEIWN M ISK AYTLAVLLTQYALPL SIVFAYSRIA RM IR A R

*B. malayi* NPR-11 -----SSTF<sup>IT</sup>NA<sup>IN</sup>NE<sup>RR</sup>KS<sup>VA</sup>GR<sup>QR</sup>RT  
*W. bancrofti* NPR-11 -----SSTF<sup>TAN</sup>VIN<sup>NE</sup>RR<sup>KS</sup>SV<sup>AG</sup>RR<sup>QR</sup>RT  
*D. immitis* NPR-11 -----TSTF<sup>LAN</sup>A<sup>IN</sup>NE<sup>RR</sup>RS<sup>VA</sup>GR<sup>QR</sup>RT  
*O. volvulus* NPR-11 -----  
*O. ochengi* NPR-11 -----  
*L. loa* NPR-11 -----SSTF<sup>TAN</sup>AN<sup>N</sup>NE<sup>RR</sup>KS<sup>VA</sup>GR<sup>QR</sup>RT  
*A. suum* NPR-11 -----SCAN<sup>SL</sup>AT<sup>MS</sup>HR<sup>RR</sup>-SV<sup>VE</sup>RR<sup>QR</sup>RT  
*A. caninum* NPR-11 -----NISLP  
*N. brasiliensis* NPR-11 -----NISF<sup>P</sup>N<sup>S</sup>LS<sup>Q</sup>NQ<sup>RR</sup>RS<sup>SV</sup>VE<sup>RR</sup>QR<sup>RT</sup>  
*H. contortus* NPR-11 -----NIP<sup>F</sup>SS<sup>SL</sup>T  
*C. elegans* NPR-11 -----NQNV<sup>T</sup>T<sup>N</sup>T<sup>N</sup>TS<sup>Q</sup>RR<sup>RS</sup>SV<sup>VE</sup>RR<sup>QR</sup>RT  
*S. ratti* NPR-11 -----NIK<sup>L</sup>IGEDANN-RR<sup>KH</sup>VA<sup>ER</sup>QR<sup>RT</sup>  
*B. xylophilus* NPR-11 -----RHSR-----SI<sup>AD</sup>RR<sup>HR</sup>RT  
*G. pallida* NPR-11 GGGTAGNQPNTFRKSSGTGVGFQTLT<sup>T</sup>NCFNAP<sup>EV</sup>TKQ<sup>S</sup>NGQ<sup>T</sup>V<sup>LT</sup>TLN<sup>STA</sup>ASQ<sup>KAT</sup>K<sup>T</sup>S<sup>ISS</sup>NGE-----VKNA<sup>AE</sup>ALISQ<sup>RR</sup>KS<sup>VA</sup>DR<sup>HR</sup>RT  
*M. hapla* NPR-11 GGGVDS-----RKNSV<sup>Y</sup>LNT<sup>P</sup>V<sup>FS</sup>-NRSSL<sup>CR</sup>QIAAGGATSP<sup>FS</sup>ASDNGHQ<sup>NSK</sup>----LVIF<sup>T</sup>NDE<sup>T</sup>NCN--LLQ<sup>N</sup>VNP<sup>SAE</sup>ILLN<sup>Q</sup>RR<sup>KS</sup>IA<sup>VR</sup>HR<sup>RT</sup>  
*M. incognita* NPR-11.1 GG-RDS-----RKNSV<sup>Y</sup>LNT<sup>P</sup>V<sup>LS</sup>NRSS<sup>FR</sup>Q<sup>IA</sup>SGGATSP<sup>FI</sup>ASDNGHK<sup>HS</sup>SNK<sup>Q</sup>PLV<sup>IST</sup>NGEY<sup>S</sup>QTNG<sup>N</sup>LHN<sup>VNP</sup>SAE<sup>ILL</sup>KQ<sup>RR</sup>KS<sup>IA</sup>DR<sup>HR</sup>RT  
*M. incognita* NPR-11.2 GG-RDS-----RKNSV<sup>Y</sup>LNT<sup>P</sup>V<sup>FG</sup>SNRSS<sup>FR</sup>Q<sup>IA</sup>SGGATSP<sup>FI</sup>ASDNGHK<sup>HS</sup>SNK<sup>Q</sup>PLV<sup>IST</sup>NGEY<sup>S</sup>QTNG<sup>N</sup>LQ<sup>NVNP</sup>SAE<sup>ILL</sup>KQ<sup>RR</sup>KS<sup>IA</sup>DR<sup>HR</sup>RT

Consensus T RRKSV A R RRT

*B. malayi* NPR-11 HLLL<sup>IC</sup>V<sup>V</sup>I<sup>V</sup>F<sup>AV</sup>AW<sup>L</sup>PL<sup>N</sup>V<sup>FH</sup>----V<sup>L</sup>NT<sup>F</sup>G<sup>I</sup>VE<sup>-</sup>FS<sup>V</sup>PL<sup>FA</sup>IC<sup>HL</sup>I<sup>AM</sup>G<sup>S</sup>ACL<sup>N</sup>P<sup>VS</sup>Y<sup>A</sup>FF<sup>N</sup>Q<sup>N</sup>FR<sup>Q</sup>Q<sup>F</sup>IM<sup>F</sup>Y<sup>E</sup>AA<sup>IR</sup>KN<sup>L</sup>Q<sup>I</sup>FG<sup>W</sup>IT<sup>AV</sup>R<sup>N</sup>M<sup>R</sup>-D<sup>G</sup>V  
*W. bancrofti* NPR-11 HLLL<sup>IC</sup>V<sup>V</sup>I<sup>V</sup>F<sup>AV</sup>AW<sup>L</sup>PL<sup>N</sup>V<sup>FH</sup>----V<sup>L</sup>NT<sup>F</sup>G<sup>I</sup>VE<sup>-</sup>FS<sup>V</sup>PL<sup>FA</sup>IC<sup>HL</sup>I<sup>AM</sup>G<sup>S</sup>ACL<sup>N</sup>P<sup>VS</sup>Y<sup>A</sup>FF<sup>N</sup>Q<sup>N</sup>FR<sup>Q</sup>Q<sup>F</sup>IM<sup>F</sup>Y<sup>E</sup>GAA<sup>IR</sup>KI<sup>L</sup>Q<sup>I</sup>FG<sup>W</sup>IT<sup>P</sup>AR<sup>N</sup>M<sup>R</sup>-D<sup>R</sup>V

*D. immitis* NPR-11 HLLLCVVTTF<sup>1</sup>FAV<sup>2</sup>AWL<sup>3</sup>PLNVF<sup>4</sup>H---VLN<sup>5</sup>TF<sup>6</sup>G<sup>7</sup>IV<sup>8</sup>E-F<sup>9</sup>SV<sup>10</sup>PL<sup>11</sup>FA<sup>12</sup>ICH<sup>13</sup>L<sup>14</sup>IAM<sup>15</sup>GSS<sup>16</sup>CL<sup>17</sup>NP<sup>18</sup>VS<sup>19</sup>YAFF<sup>20</sup>N<sup>21</sup>Q<sup>22</sup>N<sup>23</sup>FR<sup>24</sup>Q<sup>25</sup>Q<sup>26</sup>F<sup>27</sup>VM<sup>28</sup>F<sup>29</sup>Y<sup>30</sup>DA<sup>31</sup>AI<sup>32</sup>RKI<sup>33</sup>L<sup>34</sup>QISDLVTPTRYKR-DRM  
*O. volvulus* NPR-11 -----WL<sup>1</sup>PLNVF<sup>2</sup>H---VLN<sup>3</sup>TF<sup>4</sup>G<sup>5</sup>IV<sup>6</sup>E-F<sup>7</sup>SV<sup>8</sup>PL<sup>9</sup>FA<sup>10</sup>ICH<sup>11</sup>L<sup>12</sup>IAM<sup>13</sup>GSA<sup>14</sup>CL<sup>15</sup>NP<sup>16</sup>VS<sup>17</sup>YAFF<sup>18</sup>N<sup>19</sup>Q<sup>20</sup>N<sup>21</sup>FR<sup>22</sup>Q<sup>23</sup>Q<sup>24</sup>F<sup>25</sup>VM<sup>26</sup>F<sup>27</sup>YD-----  
*O. ochengi* NPR-11 -----WL<sup>1</sup>PLNVF<sup>2</sup>H---VLN<sup>3</sup>TF<sup>4</sup>G<sup>5</sup>IV<sup>6</sup>E-F<sup>7</sup>SV<sup>8</sup>PL<sup>9</sup>FA<sup>10</sup>ICH<sup>11</sup>L<sup>12</sup>IAM<sup>13</sup>GSA<sup>14</sup>CL<sup>15</sup>NP<sup>16</sup>VS<sup>17</sup>YAFF<sup>18</sup>N<sup>19</sup>Q<sup>20</sup>N<sup>21</sup>FR<sup>22</sup>Q<sup>23</sup>Q<sup>24</sup>F<sup>25</sup>VM<sup>26</sup>F<sup>27</sup>YD-----  
*L. loa* NPR-11 HLLLCVVTTF<sup>1</sup>FAV<sup>2</sup>AWL<sup>3</sup>PLNVF<sup>4</sup>H---VLN<sup>5</sup>TF<sup>6</sup>G<sup>7</sup>IV<sup>8</sup>E-F<sup>9</sup>SV<sup>10</sup>PL<sup>11</sup>FA<sup>12</sup>ICH<sup>13</sup>L<sup>14</sup>IAM<sup>15</sup>GSA<sup>16</sup>CL<sup>17</sup>NP<sup>18</sup>VS<sup>19</sup>YAFF<sup>20</sup>N<sup>21</sup>Q<sup>22</sup>N<sup>23</sup>FR<sup>24</sup>Q<sup>25</sup>Q<sup>26</sup>F<sup>27</sup>IM<sup>28</sup>F<sup>29</sup>Y<sup>30</sup>EAA<sup>31</sup>IRKI<sup>32</sup>L<sup>33</sup>QTFD<sup>34</sup>V<sup>35</sup>W<sup>36</sup>TP<sup>37</sup>AR<sup>38</sup>NKH-DRV  
*A. suum* NPR-11 HLLLCV<sup>1</sup>V<sup>2</sup>IM<sup>3</sup>FA<sup>4</sup>V<sup>5</sup>AWL<sup>6</sup>PLNVF<sup>7</sup>H---VLN<sup>8</sup>TF<sup>9</sup>G<sup>10</sup>IV<sup>11</sup>KG<sup>12</sup>F<sup>13</sup>SV<sup>14</sup>PL<sup>15</sup>FA<sup>16</sup>L<sup>17</sup>CH<sup>18</sup>V<sup>19</sup>IAM<sup>20</sup>GSA<sup>21</sup>CL<sup>22</sup>NP<sup>23</sup>VS<sup>24</sup>YAFF<sup>25</sup>N<sup>26</sup>HN<sup>27</sup>FR<sup>28</sup>Q<sup>29</sup>Q<sup>30</sup>F<sup>31</sup>V<sup>32</sup>AM<sup>33</sup>F<sup>34</sup>EQA<sup>35</sup>GL<sup>36</sup>SR<sup>37</sup>LGILLHLRKKCMLGGRR-----  
*A. caninum* NPR-11 -----  
*N. brasiliensis* NPR-11 HLLLCV<sup>1</sup>V<sup>2</sup>V<sup>3</sup>FA<sup>4</sup>I<sup>5</sup>AWL<sup>6</sup>PLNVF<sup>7</sup>H---MV<sup>8</sup>N<sup>9</sup>TF<sup>10</sup>EW<sup>11</sup>V<sup>12</sup>SL<sup>13</sup>F<sup>14</sup>SV<sup>15</sup>ST<sup>16</sup>FA<sup>17</sup>V<sup>18</sup>CH<sup>19</sup>V<sup>20</sup>AAM<sup>21</sup>C<sup>22</sup>SA<sup>23</sup>CL<sup>24</sup>NP<sup>25</sup>LI<sup>26</sup>YAFF<sup>27</sup>N<sup>28</sup>HN<sup>29</sup>FR<sup>30</sup>TE<sup>31</sup>FI<sup>32</sup>AL<sup>33</sup>FER<sup>34</sup>L<sup>35</sup>G<sup>36</sup>FR<sup>37</sup>K<sup>38</sup>RDVV<sup>39</sup>FS<sup>40</sup>W<sup>41</sup>DE<sup>42</sup>ER<sup>43</sup>ER<sup>44</sup>KK<sup>45</sup>GM  
*H. contortus* NPR-11 HLLLCV<sup>1</sup>V<sup>2</sup>V<sup>3</sup>FA<sup>4</sup>I<sup>5</sup>AWL<sup>6</sup>PLNVF<sup>7</sup>H---NT<sup>8</sup>TF<sup>9</sup>EW<sup>10</sup>V<sup>11</sup>SL<sup>12</sup>F<sup>13</sup>SV<sup>14</sup>ST<sup>15</sup>FA<sup>16</sup>ICH<sup>17</sup>V<sup>18</sup>AAM<sup>19</sup>C<sup>20</sup>SA<sup>21</sup>CL<sup>22</sup>NP<sup>23</sup>LI<sup>24</sup>YAFF<sup>25</sup>N<sup>26</sup>HN<sup>27</sup>FR<sup>28</sup>TE<sup>29</sup>FI<sup>30</sup>RL<sup>31</sup>FE<sup>32</sup>K<sup>33</sup>L<sup>34</sup>GL<sup>35</sup>R-----  
*C. elegans* NPR-11 HLLLCV<sup>1</sup>V<sup>2</sup>V<sup>3</sup>FA<sup>4</sup>V<sup>5</sup>AWL<sup>6</sup>PLNVF<sup>7</sup>H---I<sup>8</sup>F<sup>9</sup>NT<sup>10</sup>FE<sup>11</sup>V<sup>12</sup>NS<sup>13</sup>F<sup>14</sup>SV<sup>15</sup>TF<sup>16</sup>SI<sup>17</sup>CH<sup>18</sup>L<sup>19</sup>AAM<sup>20</sup>C<sup>21</sup>SA<sup>22</sup>CL<sup>23</sup>NP<sup>24</sup>LI<sup>25</sup>YAFF<sup>26</sup>N<sup>27</sup>HN<sup>28</sup>FR<sup>29</sup>IE<sup>30</sup>FM<sup>31</sup>HL<sup>32</sup>F<sup>33</sup>DR<sup>34</sup>V<sup>35</sup>GL<sup>36</sup>RS<sup>37</sup>RVV<sup>38</sup>IF<sup>39</sup>GE<sup>40</sup>Q<sup>41</sup>ES<sup>42</sup>L<sup>43</sup>KK<sup>44</sup>SM<sup>45</sup>RT  
*S. ratti* NPR-11 N<sup>1</sup>FL<sup>2</sup>LA<sup>3</sup>S<sup>4</sup>V<sup>5</sup>LL<sup>6</sup>FA<sup>7</sup>I<sup>8</sup>AWL<sup>9</sup>F<sup>10</sup>N<sup>11</sup>I<sup>12</sup>F<sup>13</sup>H---M<sup>14</sup>LL<sup>15</sup>SL<sup>16</sup>K<sup>17</sup>V<sup>18</sup>I<sup>19</sup>IT<sup>20</sup>V<sup>21</sup>SG<sup>22</sup>TL<sup>23</sup>F<sup>24</sup>AL<sup>25</sup>CH<sup>26</sup>LM<sup>27</sup>CM<sup>28</sup>MM<sup>29</sup>SA<sup>30</sup>CL<sup>31</sup>NP<sup>32</sup>V<sup>33</sup>C<sup>34</sup>YAFF<sup>35</sup>N<sup>36</sup>Q<sup>37</sup>N<sup>38</sup>FR<sup>39</sup>N<sup>40</sup>EL<sup>41</sup>FI<sup>42</sup>L<sup>43</sup>H<sup>44</sup>K<sup>45</sup>K<sup>46</sup>LR<sup>47</sup>KN<sup>48</sup>S<sup>49</sup>NING<sup>50</sup>IN<sup>51</sup>RT<sup>52</sup>EY<sup>53</sup>SAT<sup>54</sup>V<sup>55</sup>K<sup>56</sup>R  
*B. xylophilus* NPR-11 H<sup>1</sup>FL<sup>2</sup>M<sup>3</sup>V<sup>4</sup>TL<sup>5</sup>V<sup>6</sup>V<sup>7</sup>V<sup>8</sup>FA<sup>9</sup>SA<sup>10</sup>WL<sup>11</sup>PL<sup>12</sup>N<sup>13</sup>I<sup>14</sup>F<sup>15</sup>H---L<sup>16</sup>V<sup>17</sup>N<sup>18</sup>-T<sup>19</sup>FN<sup>20</sup>I<sup>21</sup>V<sup>22</sup>QR<sup>23</sup>F<sup>24</sup>SV<sup>25</sup>PT<sup>26</sup>FA<sup>27</sup>L<sup>28</sup>CH<sup>29</sup>V<sup>30</sup>T<sup>31</sup>AL<sup>32</sup>C<sup>33</sup>SA<sup>34</sup>CL<sup>35</sup>NP<sup>36</sup>LI<sup>37</sup>YAFF<sup>38</sup>N<sup>39</sup>Q<sup>40</sup>N<sup>41</sup>FR<sup>42</sup>TE<sup>43</sup>F<sup>44</sup>V<sup>45</sup>AM<sup>46</sup>F<sup>47</sup>ES<sup>48</sup>L<sup>49</sup>GL-----  
*G. pallida* NPR-11 N<sup>1</sup>LL<sup>2</sup>V<sup>3</sup>TL<sup>4</sup>V<sup>5</sup>V<sup>6</sup>V<sup>7</sup>FA<sup>8</sup>FA<sup>9</sup>WL<sup>10</sup>PL<sup>11</sup>N<sup>12</sup>I<sup>13</sup>F<sup>14</sup>H---L<sup>15</sup>V<sup>16</sup>N<sup>17</sup>-T<sup>18</sup>F<sup>19</sup>SS<sup>20</sup>SAS<sup>21</sup>F<sup>22</sup>SV<sup>23</sup>P<sup>24</sup>V<sup>25</sup>F<sup>26</sup>AL<sup>27</sup>CH<sup>28</sup>L<sup>29</sup>I<sup>30</sup>TAM<sup>31</sup>C<sup>32</sup>SA<sup>33</sup>CL<sup>34</sup>NP<sup>35</sup>CC<sup>36</sup>YAFF<sup>37</sup>N<sup>38</sup>Q<sup>39</sup>N<sup>40</sup>FR<sup>41</sup>Q<sup>42</sup>E<sup>43</sup>FL<sup>44</sup>AI<sup>45</sup>Y<sup>46</sup>H<sup>47</sup>K<sup>48</sup>L<sup>49</sup>GL<sup>50</sup>I<sup>51</sup>W<sup>52</sup>YRR<sup>53</sup>F<sup>54</sup>SL<sup>55</sup>FG<sup>56</sup>KS<sup>57</sup>I<sup>58</sup>GL<sup>59</sup>NG<sup>60</sup>DS  
*M. hapla* NPR-11 N<sup>1</sup>M<sup>2</sup>LL<sup>3</sup>V<sup>4</sup>TL<sup>5</sup>V<sup>6</sup>V<sup>7</sup>V<sup>8</sup>FA<sup>9</sup>CA<sup>10</sup>WL<sup>11</sup>PL<sup>12</sup>N<sup>13</sup>I<sup>14</sup>F<sup>15</sup>HAY<sup>16</sup>TL<sup>17</sup>L<sup>18</sup>FN<sup>19</sup>KE<sup>20</sup>SKTAS<sup>21</sup>F<sup>22</sup>SV<sup>23</sup>PT<sup>24</sup>FA<sup>25</sup>L<sup>26</sup>CH<sup>27</sup>L<sup>28</sup>I<sup>29</sup>TAM<sup>30</sup>C<sup>31</sup>SA<sup>32</sup>CL<sup>33</sup>NP<sup>34</sup>CC<sup>35</sup>YAFF<sup>36</sup>N<sup>37</sup>Q<sup>38</sup>N<sup>39</sup>FR<sup>40</sup>Q<sup>41</sup>E<sup>42</sup>FL<sup>43</sup>AM<sup>44</sup>Y<sup>45</sup>R<sup>46</sup>K<sup>47</sup>L<sup>48</sup>GL<sup>49</sup>M-----  
*M. incognita* NPR-11.1 N<sup>1</sup>M<sup>2</sup>LL<sup>3</sup>V<sup>4</sup>TL<sup>5</sup>V<sup>6</sup>V<sup>7</sup>V<sup>8</sup>FA<sup>9</sup>CA<sup>10</sup>WL<sup>11</sup>PL<sup>12</sup>N<sup>13</sup>I<sup>14</sup>F<sup>15</sup>HAY<sup>16</sup>TL<sup>17</sup>L<sup>18</sup>FN<sup>19</sup>KE<sup>20</sup>SKTAS<sup>21</sup>F<sup>22</sup>SV<sup>23</sup>PT<sup>24</sup>FA<sup>25</sup>L<sup>26</sup>CH<sup>27</sup>L<sup>28</sup>I<sup>29</sup>TAM<sup>30</sup>C<sup>31</sup>SA<sup>32</sup>CL<sup>33</sup>NP<sup>34</sup>CC<sup>35</sup>YAFF<sup>36</sup>N<sup>37</sup>Q<sup>38</sup>N<sup>39</sup>FR<sup>40</sup>Q<sup>41</sup>E<sup>42</sup>FL<sup>43</sup>AM<sup>44</sup>Y<sup>45</sup>R<sup>46</sup>K<sup>47</sup>L<sup>48</sup>GL<sup>49</sup>IT<sup>50</sup>YRC<sup>51</sup>F<sup>52</sup>AR<sup>53</sup>FT<sup>54</sup>K<sup>55</sup>R<sup>56</sup>L<sup>57</sup>CP<sup>58</sup>ST<sup>59</sup>EI  
*M. incognita* NPR-11.2 N<sup>1</sup>M<sup>2</sup>LL<sup>3</sup>V<sup>4</sup>TL<sup>5</sup>V<sup>6</sup>V<sup>7</sup>V<sup>8</sup>FA<sup>9</sup>CA<sup>10</sup>WL<sup>11</sup>PL<sup>12</sup>N<sup>13</sup>I<sup>14</sup>F<sup>15</sup>HAY<sup>16</sup>TL<sup>17</sup>L<sup>18</sup>FN<sup>19</sup>KL<sup>20</sup>SKTAS<sup>21</sup>F<sup>22</sup>SV<sup>23</sup>PT<sup>24</sup>FA<sup>25</sup>L<sup>26</sup>CH<sup>27</sup>L<sup>28</sup>I<sup>29</sup>TAM<sup>30</sup>C<sup>31</sup>SA<sup>32</sup>CL<sup>33</sup>NP<sup>34</sup>CC<sup>35</sup>YAFF<sup>36</sup>N<sup>37</sup>Q<sup>38</sup>N<sup>39</sup>FR<sup>40</sup>Q<sup>41</sup>E<sup>42</sup>FL<sup>43</sup>AM<sup>44</sup>Y<sup>45</sup>R<sup>46</sup>K<sup>47</sup>L<sup>48</sup>GL<sup>49</sup>TT<sup>50</sup>YRC<sup>51</sup>F<sup>52</sup>V<sup>53</sup>R<sup>54</sup>FT<sup>55</sup>K<sup>56</sup>R<sup>57</sup>L<sup>58</sup>CP<sup>59</sup>ST<sup>60</sup>EI

Consensus HLLLV VVVVFAVAVLPLNVF.....VLN<sup>5</sup>TF IV FSVPLFAICHLIAM SA<sup>14</sup>CLNPV YAFFNQNFRQEFV MYE LGL L

*B. malayi* NPR-11 KYSRS<sup>1</sup>AK<sup>2</sup>SV<sup>3</sup>IT<sup>4</sup>-----TS<sup>5</sup>A<sup>6</sup>IN<sup>7</sup>A<sup>8</sup>Q<sup>9</sup>L<sup>10</sup>V<sup>11</sup>GR<sup>12</sup>GD<sup>13</sup>N<sup>14</sup>DE<sup>15</sup>K<sup>16</sup>SEE<sup>17</sup>EAK<sup>18</sup>ID<sup>19</sup>L<sup>20</sup>NDH-----  
*W. bancrofti* NPR-11 KYSRS<sup>1</sup>AK<sup>2</sup>P<sup>3</sup>V<sup>4</sup>IT<sup>5</sup>TQ-----HT<sup>6</sup>S<sup>7</sup>A<sup>8</sup>IN<sup>9</sup>A<sup>10</sup>Q<sup>11</sup>F<sup>12</sup>V<sup>13</sup>GR<sup>14</sup>GD<sup>15</sup>N<sup>16</sup>DE<sup>17</sup>K<sup>18</sup>SEE<sup>19</sup>EAK<sup>20</sup>ID<sup>21</sup>L<sup>22</sup>NDH-----  
*D. immitis* NPR-11 KYN<sup>1</sup>Q<sup>2</sup>SP<sup>3</sup>RNA<sup>4</sup>IM<sup>5</sup>Q-----HT<sup>6</sup>ST<sup>7</sup>FN<sup>8</sup>V<sup>9</sup>K<sup>10</sup>Y<sup>11</sup>MG<sup>12</sup>K<sup>13</sup>G<sup>14</sup>D<sup>15</sup>K<sup>16</sup>DK<sup>17</sup>AE<sup>18</sup>I<sup>19</sup>HL<sup>20</sup>NN-----  
*O. volvulus* NPR-11 -----  
*O. ochengi* NPR-11 -----  
*L. loa* NPR-11 KYN<sup>1</sup>RS<sup>2</sup>AN<sup>3</sup>AV<sup>4</sup>IT<sup>5</sup>TQ-----HA<sup>6</sup>ST<sup>7</sup>IN<sup>8</sup>AK<sup>9</sup>FM<sup>10</sup>G<sup>11</sup>K<sup>12</sup>CD<sup>13</sup>NE<sup>14</sup>K<sup>15</sup>P<sup>16</sup>DE<sup>17</sup>EAK<sup>18</sup>ID<sup>19</sup>L<sup>20</sup>NDH-----  
*A. suum* NPR-11 KYA<sup>1</sup>AT<sup>2</sup>SCA<sup>3</sup>V<sup>4</sup>ASS<sup>5</sup>KS<sup>6</sup>PR<sup>7</sup>ML<sup>8</sup>P<sup>9</sup>TT<sup>10</sup>V<sup>11</sup>H<sup>12</sup>NE<sup>13</sup>E<sup>14</sup>F<sup>15</sup>N<sup>16</sup>EE<sup>17</sup>H<sup>18</sup>DA<sup>19</sup>AP<sup>20</sup>KE<sup>21</sup>SE<sup>22</sup>F<sup>23</sup>IL<sup>24</sup>R<sup>25</sup>IN<sup>26</sup>M<sup>27</sup>V<sup>28</sup>NTV-----  
*A. caninum* NPR-11 -----  
*N. brasiliensis* NPR-11 ERE<sup>1</sup>V<sup>2</sup>K<sup>3</sup>SS<sup>4</sup>CPT<sup>5</sup>AV<sup>6</sup>HT<sup>7</sup>VRT<sup>8</sup>SVA<sup>9</sup>ER<sup>10</sup>LDES<sup>11</sup>VAL<sup>12</sup>H<sup>13</sup>LDT<sup>14</sup>DE<sup>15</sup>QL-----  
*H. contortus* NPR-11 -----  
*C. elegans* NPR-11 EFR<sup>1</sup>SR<sup>2</sup>GG<sup>3</sup>CK<sup>4</sup>TV<sup>5</sup>TTA<sup>6</sup>EP<sup>7</sup>AT<sup>8</sup>F<sup>9</sup>Q<sup>10</sup>R<sup>11</sup>M<sup>12</sup>NES<sup>13</sup>MIL<sup>14</sup>SAME<sup>15</sup>Q<sup>16</sup>DE<sup>17</sup>QL-----  
*S. ratti* NPR-11 STC-----  
*B. xylophilus* NPR-11 -----  
*G. pallida* NPR-11 SDK<sup>1</sup>KT<sup>2</sup>K<sup>3</sup>WR<sup>4</sup>PNR-----  
*M. hapla* NPR-11 -----  
*M. incognita* NPR-11.1 NKE<sup>1</sup>KS<sup>2</sup>V<sup>3</sup>D<sup>4</sup>AT<sup>5</sup>Q<sup>6</sup>S<sup>7</sup>NE<sup>8</sup>N<sup>9</sup>KE<sup>10</sup>L<sup>11</sup>GT<sup>12</sup>SP<sup>13</sup>SE<sup>14</sup>NEAN<sup>15</sup>QH<sup>16</sup>L<sup>17</sup>Q<sup>18</sup>TI<sup>19</sup>Q<sup>20</sup>GV<sup>21</sup>L<sup>22</sup>KN<sup>23</sup>S<sup>24</sup>KE<sup>25</sup>K<sup>26</sup>SCE<sup>27</sup>V<sup>28</sup>LN<sup>29</sup>V<sup>30</sup>K<sup>31</sup>ME<sup>32</sup>N<sup>33</sup>Q<sup>34</sup>T<sup>35</sup>KN<sup>36</sup>P<sup>37</sup>LE<sup>38</sup>LC<sup>39</sup>ET<sup>40</sup>LIE<sup>41</sup>K<sup>42</sup>PP<sup>43</sup>N<sup>44</sup>LAK<sup>45</sup>TI<sup>46</sup>Q<sup>47</sup>MD<sup>48</sup>L  
*M. incognita* NPR-11.2 SK-----

Consensus

10. NPR-12 homologues

*B. malayi* NPR-12 -----NNFLWQHRGGS-YVLLLYGLVCFGTLANLFVLI AFLRTSHIRNLRNYFIANLAMSDFLLCVVTA  
*W. bancrofti* NPR-12 -----NNFLWQHRGGS-YVLLLYGLVCFGTLANLFVLI AFLRTSHIRNLRNYFIANLAMSDFLLCVVTA  
*O. volvulus* NPR-12 -----LHKFQNSFLWQHRGEN-YVLLLYGLLCSFGTLANLFVLI AFLRTSHIRNLRNYFIANLAASDFLLCVVTA  
*O. ochengi* NPR-12 -----LHKFQNSFLWQHRGEN-YVLLLYGLLCSFGTLANLFVLI AFLRTSHIRNLRNYFIANLAVSDFLLCVVTA  
*L. loa* NPR-12 -----MPALIFAESGSRSNWSDINCDEFDETYNQNSFLWQHRGES-YVLLLYGLVCFGTLANLFVLI AFLRTSHIRNLRNYFIANLAVSDFLLCVVTA  
*A. suum* NPR-12 -----INCWVWFDETYIQNNFYWRHRGAC-YMLLLYGLVCFGTALANLLVLAFLRTPHLRNLNRNYFIANLAVSDLLMCTIVTA  
*N. brasiliensis* NPR-12 -----PNASGEVWVVECDWFDERSMQNNFYVWLHLKSSIVFLYGLVCFGTALANLVVLFVAFIRTSNLRNLRNSFIVNLAASDFLLCVVTA  
*H. contortus* NPR-12 -----PNASGEVWVVECDWFDQIRAMQNNFYVWLHLKSSIVFLYGLVCFGTALANLIVLFAFIRTSNLRNLRNSFIVNLAASDFLLCVVTA  
*C. elegans* NPR-12 -----MQPPNSTGQWTEIHCDFWAEHQNYQN-SLYKINFDSPIVVPYGLVCSFGALANFIVLLAFVIRTANLRNLRNSFIVNLAASDFLLCVVTA  
*S. ratti* NPR-12 -----NTMMWETRGIK-FLPYLYTVTCLIGFLANSILIVFLTKKLRNLRNYFIINLAISDLTICTVSA  
*B. xylophilus* NPR-12 MNTMDLTPGPAAITVGSRNWSFFSCDALDEVMGIONGFYWRNKGAG-TIIMLYAIVCSFGALANLLVIVSFLKTPHLHNLNRNYFIANLAVSDLLMCTIVTA  
*G. pallida* NPR-12 -----LQNHFLWRQNSPV-LLLSLYAIVCSFGTINLFLVLLSFARVAQLRNLNRNYFIANLAVSDLLICTVTA  
*M. hapla* NPR-12 -----LQFNEQSNWTEMDCGWLDEIREIQNHFYWRHTNPA-LLLCLYAAVCFGTALANFLVLLSFARVAQLRNLNRNYFIANLAVSDLLMCTIVTA  
*M. incognita* NPR-12 -----QFNEQHLNGTEMDCGWLDEIREIQNHFYWRHTNPA-LLLCLYAAVCFGTALANFFVLLSFARVAQLRNLNRNYFIANLAVSDLLMCTIVTA

Consensus I C DEI IQN FYW HRG G YVLLLYGLVCSFGALANLFVLI AFLRTSHLRNLRNYFIANLAVSDLLLCVVTA

*B. malayi* NPR-12 PVTLYLIRNLFWPFGLACQTLASVQAVNMFVSCMTLVLIAMDRVLLTFCPIKWQVLAAPVVMCYCTVWLASIVIAAPYFFAVNAEDV-MLEPWNQPY  
*W. bancrofti* NPR-12 PVTLYLIRNLFWPFGLACQTLASVQAVNMFVSCMTLVLIAMDRVLLTFCPIKWQVLAAPVVMCYCTVWLASIVIAAPYFFAVNAEDV-MLEPWNQPY  
*O. volvulus* NPR-12 PVTLYLIRNLFWPFGLACQTLASVQAVNMFVSCMTLVLIAMDRVLLTFCPIKWQVLAAPVVMCYCTVWLASIVIAAPYFFAVNAEDV-MLEPWNQPY  
*O. ochengi* NPR-12 PVTLYLIRNLFWPFGLACQTLASVQAVNMFVSCMTLVLIAMDRVLLTFCPIKWQVLAAPVVMCYCTVWLASIVIAAPYFFAVNAEDV-MLEPWNQPY  
*L. loa* NPR-12 PVTLYLIRNLFWPFGLACQTLASVQAVNMFVSCMTLVLIAMDRVLLTFCPIKWQVLAAPVVMCYCTVWLASIVIAAPYFFAVNAEDV-MLEPWNQPY  
*A. suum* NPR-12 PVTLYLIRNLFWPFGLACQTLASVQAVNMFVSCMTLVLIAMDRVLLTFCPIKWQVLAAPVVMCYCTVWLASIVIAAPYFFAVNAEDV-MLEPWNQPY  
*N. brasiliensis* NPR-12 PVTLYLIRNLFWPFGLACQTLASVQAVNMFVSCMTLVLIAMDRVLLTFCPIKWQVLAAPVVMCYCTVWLASIVIAAPYFFAVNAEDV-MLEPWNQPY  
*H. contortus* NPR-12 PVTLYLIRNLFWPFGLACQTLASVQAVNMFVSCMTLVLIAMDRVLLTFCPIKWQVLAAPVVMCYCTVWLASIVIAAPYFFAVNAEDV-MLEPWNQPY  
*C. elegans* NPR-12 PVTLYLIRNLFWPFGLACQTLASVQAVNMFVSCMTLVLIAMDRVLLTFCPIKWQVLAAPVVMCYCTVWLASIVIAAPYFFAVNAEDV-MLEPWNQPY  
*S. ratti* NPR-12 PVTLYLIRNLFWPFGLACQTLASVQAVNMFVSCMTLVLIAMDRVLLTFCPIKWQVLAAPVVMCYCTVWLASIVIAAPYFFAVNAEDV-MLEPWNQPY  
*B. xylophilus* NPR-12 PVTLYLIRNLFWPFGLACQTLASVQAVNMFVSCMTLVLIAMDRVLLTFCPIKWQVLAAPVVMCYCTVWLASIVIAAPYFFAVNAEDV-MLEPWNQPY  
*G. pallida* NPR-12 PVTLYLIRNLFWPFGLACQTLASVQAVNMFVSCMTLVLIAMDRVLLTFCPIKWQVLAAPVVMCYCTVWLASIVIAAPYFFAVNAEDV-MLEPWNQPY  
*M. hapla* NPR-12 PVTLYLIRNLFWPFGLACQTLASVQAVNMFVSCMTLVLIAMDRVLLTFCPIKWQVLAAPVVMCYCTVWLASIVIAAPYFFAVNAEDV-MLEPWNQPY  
*M. incognita* NPR-12 PVTLYLIRNLFWPFGLACQTLASVQAVNMFVSCMTLVLIAMDRVLLTFCPIKWQVLAAPVVMCYCTVWLASIVIAAPYFFAVNAEDV-MLEPWNQPY

Consensus PVTLYLIRNLFWPFGLACQTLASVQAVNMFVSCMTLVLIAMDRVLLTFCPIKWQVLAAPVVMCYCTVWLASIVIAAPYFFAVNAEDV-MLEPWNQPY

*B. malayi* NPR-12 IDVTL-HICGRKRPQTCIE--KAWHRLPFSRRTYTLVLAIQYLLPLTALAFSFSQIGSAIYKRVKASTTIGQKRRQVMQQRNRKALLLLSLLVLIYATA  
*W. bancrofti* NPR-12 IDVTL-HICGRKRPQTCIE--KAWHRLPFSRRTYTLVLAIQYLLPLTALAFSFSQIGSAIYKRVKASTTIGQKRRQVMQQRNRKALLLLSLLVLIYATA  
*O. volvulus* NPR-12 IDL---YICGRKRPQTCIE--KAWHRLPFSRRTYTLVLAIQYLLPLTALAFSFSQIGSAIYKRVKASTTIGQKRRQVMQQRNRKALLLLSLLVLIYATA  
*O. ochengi* NPR-12 IDL---YICGRKRPQTCIE--KAWHRLPFSRRTYTLVLAIQYLLPLTALAFSFSQIGSAIYKRVKASTTIGQKRRQVMQQRNRKALLLLSLLVLIYATA  
*L. loa* NPR-12 TDVMI-HICGRKRPQTCIE--KAWHRLPFSRRTYTLVLAIQYLLPLTALAFSFSQIGSAIYKRVKASTTIGQKRRQVMQQRNRKALLLLSLLVLIYATA

*A. suum* NPR-12 **I**GTMV-RYCG**H**RPQ**I**C**L**E--**K**THRLPFSRRTYTLTVLAIQYLLPLAALAFQYSQIGSTIRRRVKASTTVDQRRH**M**QRNRKALLLLLVLYAIA  
*N. brasiliensis* NPR-12 TPAML-KICDRSYPE**I**C**M**EMQDTWERAYISKTFFTVTVLAIQYLLPLFALAYAYMQIGSTIRRRSKVSR**T**INQARRMS**M**QSRNRKALLLLMILVLYAIC  
*H. contortus* NPR-12 TPKML-SICGRSYPE**I**C**M**EIQDTWERAYISKTFFTIIVLAIQYLLPLFALAYAYVQIGSTIRRRSKVSR**T**INQARRMS**M**QSRNRKALLLLMILVLYAIC  
*C. elegans* NPR-12 TPKML-TYCN**R**QVPE**I**CAEMQEAWDNAIVSKTYTTFVVLGIQYLLPLAALAYAYFQIGSTIQRRSKVSR**T**VD**T**TRRMQ**M**QRNRKALLLLFLVLYAYC  
*S. ratti* NPR-12 TNLS**I**ELCPNALPP**N**VCGE--**D**RWFFY**M**KQIYTLTVLAIQYLLPLIILLYSYTQIGFVIK**H**RASIPMTMDANRRHERQK**L**TR**S**ILLLTALVLYALI  
*B. xylophilus* NPR-12 **I**DEM**V**GLFEP**L**PK**M**CLER--**T**WHRLPVSRRTYTLTVLAIQYLLPLVSLGFAYSQIGFTIRRRVKYNTTVDQ**H**RK**Q**IL**A**QRNRKALLLLLVLYYIC  
*G. pallida* NPR-12 **V**DHLL-SICDR**S**RPQ**I**C**M**ENPDT**N**RLPFSRRNYTLFVLGIQYLLPLSALAIAYSQIGSTIRRRVK**M**STTVDGDR**K**Q**S**WAKRNRKALLLLSCLVLYAIA  
*M. hapla* NPR-12 **V**ELL**L**-P**I**CD**R**EQ**P**Q**I**C**M**ED**V**K**R**WDRLPFLEER---**I**LFK-RYLLPLSALAVAYSQIGSTIRRR**G**KASTT**V**HGER**K**Q**I**QRNRKAMFLLGLVLYAIA  
*M. incognita* NPR-12 **V**ELL**L**-P**I**CD**R**EQ**P**Q**I**C**M**ED**V**K**R**WDRLPFSRRTYTLTVLAIQYLLPLSALAIAYSQIGSTIRRR**G**KASTT**V**HGER**K**Q**I**QRNRKAMFLLGLVLYAIA

Consensus IDLML IC R RPQICME K WHRLPFSRRTYTLTVLAIQYLLPLTALAFAYSQIGSTIRKRVK STTVDQ RRQVM QRNRKALLLLLLLVLYAIA

*B. malayi* NPR-12 **W**FP**M**NAYNVLNVLE**V**IE**F**SQ**Y**RYL**F**CHLVG**M**T**S**ACIN**P**ILYALIN**D**SFR**A**F**I**S**I**L**R**PVIRPCARYTT**V**STNHQ**S**TFT**F**SFNERELVNHNKAQ**I**S**I**-----  
*W. bancrofti* NPR-12 **W**LP**M**NAYNVL**S**VLE**V**IE**F**SQ**Y**RYL**F**CHLVG**M**T**S**ACIN**P**ILYALIN**D**SFR**A**F**I**S**I**LV**R**PVIR**S**CTRYTT**V**ST**N**Q**S**TFT**F**SFNEREPVKHQEAQ**I**S**I**-----  
*O. volvulus* NPR-12 **W**FP**M**NAYNVLNVLE**V**IE**F**SQ**Y**RY**I**F**C**H**L**TG**M**T**S**ACIN**P**ILYALIN**D**SFR**T**A**F**I**S**IL-----  
*O. ochengi* NPR-12 **W**FP**M**NAYNVLNVLE**V**IE**F**SQ**Y**RY**I**F**C**H**L**TG**M**T**S**ACIN**P**ILYALIN**D**SFR**T**A**F**I**S**IL-----  
*L. loa* NPR-12 **W**FP**M**NAYNVLNVLE**V**IE**F**SQ**Y**RYL**F**CHLVG**M**T**S**ACIN**P**ILYALIN**D**SFR**A**F**I**S**I**LV**R**PVIR**P**CTTY**S**S**V**PINQNTY**T**FSFNEHQ**L**FKHQ**E**VLAK**V**SC**I**K  
*A. suum* NPR-12 **W**FP**M**NAYNVLNVLD**V**IE**F**SQ**Y**--**I**F**C**H**L**VG**M**T**S**AC**N**P**I**M**Y**GLIN**D**SFR**S**A**F**V**S**IL**R**PF**L**RP**C**T**K**Y**T**T**V**A**V**P**P**S**H**T**Y**T**F**S-----  
*N. brasiliensis* NPR-12 **W**AP**M**NI**N**VLS**G**F**E**V**I**S**Y**SQ**Y**RYL**F**CHLVG**I**S**S**AC**V**N**P**I**T**Y**A**LV**N**ES**F**R**N**AL**H**H**M**FL**S**FR**P**C**V**T**S**G**D**S**A**S**S**---**Y**IT**N**SK**P**AK**A**T**N**REG**Y**STR**F**EL**P**T  
*H. contortus* NPR-12 **W**AP**M**NI**N**VLS**G**F**E**V**I**S**Y**SQ**Y**--**L**F**C**H**L**VG**I**S**S**AC**V**N**P**I**T**Y**A**LV**N**ES**F**R**N**AL**H**H**M**FL**S**FR**P**C**V**T**S**G**D**S**A**S**S**Y**I**T**G**S**K**A**A**K**V**A**V**-----  
*C. elegans* NPR-12 **W**AP**M**NI**Y**H**V**L**N**GL**E**I**N**Y**S**Q**N**MY**L**F**C**H**L**VG**I**S**S**T**C**V**N**P**I**V**A**LV**N**ES**F**R**N**AL**Q**S**M**L**Q**FR**P**C**V**T**T**T**G**A**A**T**N**V**Y**A**S**A**T**S**K**A**E**N**V**T**L**M**R**D**P**F**S**T**T**P**R**P**N**  
*S. ratti* NPR-12 **W**FP**M**N**L**Y**H**I**L**T**V**L**G**L**I**K**Y**SQ**Y**--**I**T**L**H**F**I**G**V**T**S**V**I**N**P**L**L**Y**G**I**N**D**Q**F**K**N**A-----  
*B. xylophilus* NPR-12 **W**LP**M**NAYNVLNV**F**E**V**IE**F**SQ**Y**--**L**Y**C**H**L**I**G**M**T**S**A**S**I**N**P**V**M**Y**G**L**I**N**D**SFR**N**A**F**N**M**L**R**P**F**F**G**P**C**-----  
*G. pallida* NPR-12 **W**AP**M**NAYNVLH**V**F**E**A**N**F**S**Q**Y**Q**Y**L**F**CH**L**I**G**M**T**S**A**C**L**N**P**L**L**Y**A**L**I**N**D**SFR**S**A**F**I**Q**L**I**-----  
*M. hapla* NPR-12 **W**AP**M**NI**Y**N**V**L**H**V**L**E**L**I**A**F**S**Q**Y**N**Y**L**F**CH**L**I**G**M**V**S**A**C**L**N**P**L**L**Y**A**L**I**N**S**F**R**A**F**I**Q**L**I**-----  
*M. incognita* NPR-12 **W**AP**M**NI**Y**N**V**L**H**V**L**E**F**I**A**F**S**Q**Y**N**Y**L**F**CH**L**I**G**M**V**S**A**S**I**N**P**L**L**Y**A**L**I**N-----

Consensus W PM**N**A**Y**N**V**L**N**V**L**E**V**I**E**F**S**Q**Y** YL**F**CH**L**V**G**M**T**S**A**CIN**P**ILYALIN**D**SFR AFISIL

*B. malayi* NPR-12 -----  
*W. bancrofti* NPR-12 -----  
*O. volvulus* NPR-12 -----  
*O. ochengi* NPR-12 -----  
*L. loa* NPR-12 QYESLGRHGQSLNQISYR  
*A. suum* NPR-12 -----  
*N. brasiliensis* NPR-12 KNEEIE**T**L-----  
*H. contortus* NPR-12 -----  
*C. elegans* NPR-12 ERPDSV-----  
*S. ratti* NPR-12 -----  
*B. xylophilus* NPR-12 -----  
*G. pallida* NPR-12 -----  
*M. hapla* NPR-12 -----

*M. incognita* NPR-12

-----

Consensus

11. NPR-13 homologues

```

B. malayi NPR-13 -----LLCITALPITPVLAFAVKRWLFGSL
W. bancrofti NPR-13 -----VFYSALYATIFVVGVLIGNGLLIGSLVKRKRISVNPINIFLINLAISDQLLCITALPITPVLAFAVKRWLFGSL
D. immitis NPR-13 -----KHYNIYFQLFYSALYATIFVIGLIGNGLLIGSLVKRKRISVNPINIFLINLAISD-LLCITALPITPVLAFAVKRWLFGSL
O. volvulus NPR-13 -----CVDVNDIMSAFGDWTLRLDVQLFYSALYATIFVAGLIGNGLLIGNLVKRRKRISVNPINIFLINLAISDLLLLCITALPITPVLAFAVKRWLFGALL
O. ochengi NPR-13 -----FQLFYSALYATIFVAGLIGNGLLIGNLVKRRKRISVNPINIFLINLAISD-LLCITALPITPVLAFAVKRWLFGALL
L. loa NPR-13 -----NYPSFFQLFYSALYATIFVVGVLIGNGLLIGSLAKRKRISVNPINIFLINLAISD-LVSVTALPITPVLAFAVKRWLFGSL
A. suum NPR-13 -----QLIYSSLYAIFLIGLIGNGLLISSMVRKRHLISVNPINIFLINLAISDLLLLCITALPITPVLAFAVKRWLFGSL
A. caninum NPR-13 -----
N. brasiliensis NPR-13 -----CVDVNYILQMYGDWTSLEIRVTYSVVYAFIFVVGVLIGNGLLIGSLVLRKRISVANVFLNLAISDLLLLCITSVPIITPVLAFAVKRWLFGSL
H. contortus NPR-13 -----FQVVYSMVYALIFVVGVLIGNGLLIGSLVLRKRISVANVFLNLAISDLLLLCITAVPIITPVLAFAVKRWLFGSL
C. elegans NPR-13 MGDAESHHCIDVNAIQFNDWTVLFEVRLGYSVLYFLILITGLVGNGLLITISLMRKKLSVANIFLINLAISDLLLLCITAVPIITPVLAFAVKRWLFGIIM
S. ratti NPR-13 -----IFLKIISYIYIYAILFLLGLLIGNGLLIGSMVIRKRISVANIFLINLAISDILLCFITLAIITPLVSHKKVWLLGAFI
B. xylophilus NPR-13 -----IRRQMTVANVFLINLAISDLLLLCITALPITPVLAFAVKRWLFGDITM
G. pallida NPR-13 -----KQCVDLNTFMNSFGDWTLRTEVQYSFYALIFLVLIGNGLLIR--TIRRRMVSANVFLNLAISDLLLLCITALPITPVLAFAVKRWLFGSVL
M. hapla NPR-13 ---EIENCIELNSVLDQFGDWTLRWEVK-FFYSLFYAAIFVIGLIGNGLVFG--TIRRRMTVANVFLNLAISDLLLLCITALPITPVLAFAVKRWLFGAL
M. incognita NPR-13 ---EIENCIELNSVLDQFGDWTLRLDVKVFYSLFYAAIFVIGLIGNGLVFG--TIRRRMTVANVFLNLAISDLLLLCITALPITPVLAFAVKRWLFGAL

```

Consensus L YS LYA IFVVGVLIGNGLLIGSLVIRKRISVANIFLINLAISDLLLLCITALPITPVLAFAVKRWLFGSL

```

B. malayi NPR-13 CKLVPLCQGISVLISSYCLCFIADVDRYSIVMFTREPWTYHAYSLMAISWLSATVSSPLFVTQRLQPLALENTTLCGY---FCGEYNW PAD-NRIKLF
W. bancrofti NPR-13 CKLVPLCQGISVLISSYCLCFIADVDRYSIVMFTREPWTYHAYSLMAISWLSATVSSPLFVTQRLQPLALENTTLCGY---FCGEYNW PAD-NRIKLF
D. immitis NPR-13 CKLVPLCQGISVLISSYCLCFIADVDRYSIVMFTREPWTYHAYSLMAISWLSATVSSPLFVTQRLQPLALENTTLCGY---FCGEYNW PED-NRVKLF
O. volvulus NPR-13 CKLVPLCQKISVLISSYCLCFIADVDRYSIVMFTREPWTYHAYLLMAISWLSATVSSPLFVTQQLQPLALENTTLCGQ---FCGEYNW PED-NRIKLF
O. ochengi NPR-13 CKLVPLCQKISVLISSYCLCFIADVDRYSIVMFTREPWTYHAYLLMAISWLSATVSSPLFVTQQLQPLALENTTLCG---FCGEYNW PED-NRIKLF
L. loa NPR-13 CKLVPLCQGISVLISSYCLCFIADVDRYSIVMFTREPWTYHAYSLMAISWLSATVSSPLFVTQQLQPLALENTTLCGY---FCGEYNW PED-NRIKLF
A. suum NPR-13 CKLVPLCQGISVLISSYCLCFIADVDRYNIIVTPMKEPWTVRHARILVAISWLASVTVSSPLFVTQRLQPLALENTTLCGH---FCGEYDWP GD-NRVKLL
A. caninum NPR-13 -----QWIIIMCTWLVAMFASSPLYFSQSLKTLTSMANITLCEVQCFCGEFNWDQE-DHTKLV
N. brasiliensis NPR-13 CKLVPSQAISVLISSWCLCYIALDRYSIVTPLKEPWKLLHAQRVLIATWLVAFASSPLYFSQSLKTLTSMANITLCE---EFCGEYNW AQE-DHTKLV
H. contortus NRP-13 CKLVPPCQGFVLISSWCLCYIALDRYSIVTPLKEPWKLLHAQ-VLIATWLVAFIFTSPLYFSQSLKTLTSMANITLCE---FCGEFNW SQE-DHTKLV
C. elegans NPR-13 CKLVPTCQAFVLISSWCLCYIALDRYSIVTPLREPWSDRHARWLMFTWVAFVFLASPLYSQNLKTMVLENVTLCE---DFCGEFNW QSD-EISKIT
S. ratti NPR-13 CKLISPQQSTCVLVTSYSLCFIALDRYSIVTPLKEPYSIFQAQIFMFMWLSIIISIPSFVTISGLKVISSDAATLCE---FCGELYW PS--PQVQTG
B. xylophilus NPR-13 CKLVPPCQGISVLISSYCLCFIADVDRYSIVTPLKVPWITROAQCFMVLVWTAAVVLSLPLFVAQQLKHLAFANITLCEQ---FCGEYNW PTD-TRVKIT
G. pallida NPR-13 CKLVPLCQGISVLISSYCLCFIADVDRYSIVTPLKMPWIGIQAALMILCWVCCIAIASPLFMAQRLOLIEFNMTFCGL---FCGEYNW PEGHMQLKLA
M. hapla NPR-13 CKLVPLCQGISVLISSYCLCFIADVDRYSIVTPLKVPWNIQHAQWLMTLCTWFTCLIISSPLFVQGLQQLVYKNTFCGE---FCTELNWP TD-FRIKLF
M. incognita NPR-13 CKLVPLCQGISVLISSYCLCFIADVDRYSIVTPLKVPWNIQHAQWLMTLCTWFTCLIISSPLFVQGLQQLVYKNTFCGE---FCTELNWP TD-FRIKLF

```

Consensus CKLVPLCQGISVLISSYCLCFIADVDRYSIVTPLKEPWT HAQ\_LM ISWL SI VSSPLFVTQ\_LQ LALENITLCG FCGEYNW P D RIKLF7

B. malayi NPR-13 YGSMELICQYLIPVITMTFCYWKILQKVRADWIVAQHS--MLTAAQQACTAVRKRVRMYVLILMVVVFMAWLPHTIVNIFRDFGI-----EAFLD

*W. bancrofti* NPR-13 YGSM<sup>L</sup>LV<sup>C</sup>QY<sup>L</sup>IPV<sup>T</sup>IM<sup>T</sup>FCY<sup>W</sup>KI<sup>L</sup>QK<sup>V</sup>RA<sup>D</sup>W<sup>I</sup>VAQHS--MLTAAQQAQTAVR<sup>K</sup>RRV<sup>M</sup>YV<sup>L</sup>IL<sup>M</sup>VV<sup>F</sup>MASW<sup>L</sup>-----T-----EAF<sup>L</sup>D  
*D. immitis* NPR-13 YGSM<sup>L</sup>LV<sup>C</sup>QY<sup>L</sup>IPAT<sup>I</sup>IM<sup>T</sup>FCY<sup>W</sup>KI<sup>L</sup>QK<sup>V</sup>RA<sup>D</sup>W<sup>I</sup>VAQHS--MLTVAQQAQTAVR<sup>K</sup>RRV<sup>M</sup>YV<sup>L</sup>IL<sup>M</sup>VV<sup>F</sup>MASW<sup>L</sup>PLT<sup>I</sup>VNI<sup>L</sup>FRD<sup>F</sup>G----I-----EAF<sup>L</sup>D  
*O. volvulus* NPR-13 YGSM<sup>L</sup>LV<sup>C</sup>QY<sup>L</sup>IPAI<sup>I</sup>IM<sup>T</sup>FCY<sup>W</sup>KI<sup>L</sup>QK<sup>V</sup>QAD<sup>W</sup>I<sup>V</sup>AQHS--MLTAAQQAQTAVR<sup>K</sup>RRV<sup>M</sup>YV<sup>L</sup>IL<sup>M</sup>VV<sup>F</sup>MASW<sup>L</sup>PLT<sup>I</sup>VNI<sup>L</sup>FRD<sup>F</sup>GIFAHVIV--AEAF<sup>L</sup>D  
*O. ochengi* NPR-13 YGSM<sup>L</sup>LV<sup>C</sup>QY<sup>L</sup>IPAI<sup>I</sup>IM<sup>T</sup>FCY<sup>W</sup>KI<sup>L</sup>QK<sup>V</sup>QAD<sup>W</sup>I<sup>V</sup>AQHS--MLTAAQQAQTAVR<sup>K</sup>RRV<sup>M</sup>YV<sup>L</sup>IL<sup>M</sup>VV<sup>F</sup>MASW<sup>L</sup>PLT<sup>I</sup>VNI<sup>L</sup>FRD<sup>F</sup>GIFAHVIV--AEAF<sup>L</sup>D  
*L. loa* NPR-13 YGSM<sup>L</sup>LV<sup>C</sup>QY<sup>L</sup>IPVT<sup>I</sup>IM<sup>T</sup>FCY<sup>W</sup>NI<sup>L</sup>QK<sup>V</sup>RA<sup>D</sup>W<sup>I</sup>VAQHS--L<sup>T</sup>AAQQAQTAVR<sup>K</sup>RRV<sup>M</sup>YV<sup>L</sup>IL<sup>M</sup>VV<sup>F</sup>MASW<sup>L</sup>PLT<sup>I</sup>VNI<sup>L</sup>FRD<sup>F</sup>G-----IEAF<sup>L</sup>D  
*A. suum* NPR-13 YGTMLLI<sup>C</sup>QY<sup>L</sup>IPVS<sup>I</sup>IM<sup>T</sup>FCY<sup>W</sup>KI<sup>L</sup>QK<sup>V</sup>RT<sup>D</sup>W<sup>I</sup>VTEGS--MLTQAQQAQTS<sup>V</sup>R<sup>K</sup>RRV<sup>M</sup>YV<sup>L</sup>IL<sup>M</sup>VV<sup>F</sup>MASW<sup>F</sup>PLT<sup>I</sup>VNI<sup>L</sup>LRD<sup>F</sup>G-----IGT<sup>F</sup>LD  
*A. caninum* NPR-13 Y-AFLLV<sup>V</sup>QFV<sup>I</sup>PAI<sup>I</sup>MS<sup>F</sup>FCY<sup>W</sup>KI<sup>L</sup>QK<sup>V</sup>RA<sup>D</sup>W<sup>I</sup>VEEGS--MLTAAQQAQTAVR<sup>K</sup>RRV<sup>M</sup>YV<sup>L</sup>IL<sup>M</sup>VV<sup>F</sup>MTSW<sup>L</sup>PLSAV<sup>N</sup>LK<sup>D</sup>LEIP-----IGT<sup>F</sup>LD  
*N. brasiliensis* NPR-13 YGILLV<sup>V</sup>QFMI<sup>PAI</sup>IMS<sup>F</sup>FCY<sup>W</sup>KI<sup>L</sup>QK<sup>V</sup>RA<sup>D</sup>W<sup>I</sup>VEEGS--MLTAAQQAQTAVR<sup>K</sup>RRV<sup>M</sup>YV<sup>L</sup>IL<sup>M</sup>VV<sup>F</sup>MTSW<sup>F</sup>PLSAV<sup>N</sup>LK<sup>D</sup>LEIPLV-----L  
*H. contortus* NRP-13 YGISLLAV<sup>Q</sup>FMI<sup>PAV</sup>IMS<sup>F</sup>FCY<sup>W</sup>KI<sup>L</sup>QK<sup>V</sup>RT<sup>D</sup>W<sup>I</sup>VEEGS--MLTAAQQAQTAVR<sup>K</sup>RRV<sup>M</sup>YV<sup>L</sup>IL<sup>M</sup>VV<sup>F</sup>MTSW<sup>L</sup>PLSAV<sup>N</sup>LK<sup>D</sup>LEIP---L---VCC<sup>L</sup>L  
*C. elegans* NPR-13 YTTISLLI<sup>Q</sup>LIPAI<sup>I</sup>MS<sup>F</sup>FCY<sup>W</sup>LM<sup>I</sup>LQK<sup>V</sup>QT<sup>D</sup>W<sup>I</sup>VDEGS--MLTAAQQAQTAVR<sup>K</sup>RRV<sup>M</sup>YV<sup>L</sup>IL<sup>M</sup>VIV<sup>F</sup>MACW<sup>F</sup>PLSAV<sup>N</sup>LFRD<sup>L</sup>GMRFEF<sup>C</sup>QTVYK<sup>V</sup>LM  
*S. ratti* NPR-13 YGVILV<sup>F</sup>QFV<sup>I</sup>PSV<sup>M</sup>GF<sup>C</sup>Y<sup>W</sup>H<sup>I</sup>LQK<sup>V</sup>RE<sup>D</sup>W<sup>I</sup>VNKG<sup>S</sup>--MLTQAQQAQTAVR<sup>K</sup>RRV<sup>M</sup>YV<sup>L</sup>IL<sup>M</sup>VV<sup>F</sup>VLG<sup>S</sup>WAP<sup>L</sup>TLC<sup>N</sup>MARD<sup>F</sup>G-----VQL  
*B. xylophilus* NPR-13 YGSALLI<sup>L</sup>TYL<sup>I</sup>PVS<sup>I</sup>MA<sup>F</sup>FCY<sup>W</sup>KI<sup>L</sup>QK<sup>V</sup>RQ<sup>D</sup>W<sup>I</sup>VNTGS--MLTEAQAQHTS<sup>V</sup>R<sup>K</sup>RRV<sup>M</sup>YV<sup>L</sup>IL<sup>M</sup>VAV<sup>F</sup>MGSW<sup>M</sup>PLT<sup>I</sup>VNI<sup>L</sup>LRD<sup>I</sup>G-----VSA<sup>L</sup>E  
*G. pallida* NPR-13 YGISLLV<sup>I</sup>QFLV<sup>PTA</sup>IM<sup>T</sup>Y<sup>C</sup>Y<sup>W</sup>KI<sup>L</sup>QK<sup>V</sup>RQ<sup>D</sup>W<sup>I</sup>V<sup>P</sup>ANS<sup>S</sup>STI<sup>V</sup>VEQAQATV<sup>R</sup>K<sup>R</sup>RRV<sup>M</sup>YV<sup>L</sup>IL<sup>M</sup>VLI<sup>F</sup>MGSW<sup>M</sup>PLT<sup>I</sup>VNI<sup>L</sup>LRD<sup>I</sup>MD-----ILRDA  
*M. hapla* NPR-13 YGISLISI<sup>Q</sup>FLI<sup>P</sup>TL<sup>I</sup>MT<sup>Y</sup>CY<sup>W</sup>KI<sup>L</sup>QK<sup>V</sup>RQ<sup>D</sup>W<sup>I</sup>VPTNNS-IMSLEQAQATA<sup>R</sup>K<sup>R</sup>RRV<sup>M</sup>YV<sup>L</sup>IL<sup>M</sup>VLI<sup>F</sup>MGSW<sup>M</sup>PLT<sup>I</sup>VNI<sup>L</sup>LRD<sup>I</sup>G-----ISFLE  
*M. incognita* NPR-13 YGISLISI<sup>Q</sup>FLI<sup>P</sup>TL<sup>I</sup>MT<sup>Y</sup>CY<sup>W</sup>KI<sup>L</sup>QK<sup>V</sup>RQ<sup>D</sup>W<sup>I</sup>VSTNNS-IMSLEQAQATA<sup>R</sup>K<sup>R</sup>RRV<sup>M</sup>YV<sup>L</sup>IL<sup>M</sup>VLI<sup>F</sup>MGSW<sup>M</sup>PLT<sup>I</sup>VNI<sup>L</sup>LRD<sup>I</sup>G-----ISFLE

Consensus YGSM<sup>L</sup>LV<sup>I</sup>QY<sup>L</sup>IPAI<sup>I</sup>IM<sup>T</sup>FCY<sup>W</sup>KI<sup>L</sup>QK<sup>V</sup>RA<sup>D</sup>W<sup>I</sup>V S MLTAAQQAQTAVR<sup>K</sup>RRV<sup>M</sup>YV<sup>L</sup>IL<sup>M</sup>VV<sup>F</sup>MASW<sup>L</sup>PLT<sup>I</sup>VNI<sup>L</sup>LRD<sup>L</sup>G AFLD

*B. malayi* NPR-13 IQMYF<sup>K</sup>LLNVHAIAMTSIV<sup>W</sup>NPLLYF<sup>W</sup>MSKR<sup>H</sup>RKAF<sup>K</sup>EDMIGAGN<sup>Y</sup>YR--NN<sup>D</sup>VRLTKR<sup>F</sup>VV<sup>I</sup>K--PQP<sup>G</sup>NLYN<sup>Q</sup>N-----  
*W. bancrofti* NPR-13 IQMYF<sup>K</sup>LLNVHAIAMTSIV<sup>W</sup>NPLLYF<sup>W</sup>MSK-----NFR<sup>R</sup>GTLD<sup>P</sup>TC  
*D. immitis* NPR-13 IQMYF<sup>K</sup>LLNVHAIAMTSIV<sup>W</sup>NPLLYF<sup>W</sup>MSKR<sup>H</sup>RKAF<sup>K</sup>EDMIGTGN<sup>Y</sup>YR--NNE<sup>L</sup>RLV<sup>K</sup>R<sup>V</sup>CM<sup>S</sup>R--SPR<sup>P</sup>GNLYD<sup>Q</sup>NDT-----N<sup>Y</sup>RRS<sup>T</sup>LD<sup>P</sup>TC  
*O. volvulus* NPR-13 IQMYF<sup>K</sup>LLNVHAIAMTSIV<sup>W</sup>NPLLYF<sup>W</sup>MSKR<sup>H</sup>RKTF<sup>K</sup>EDMIGAGN<sup>-</sup>YR--NNE<sup>L</sup>K<sup>L</sup>M<sup>K</sup>R<sup>L</sup>CE<sup>P</sup>K--SPQ<sup>P</sup>GNHYD<sup>Q</sup>SDRH-----NFR<sup>R</sup>GTLD<sup>P</sup>TC  
*O. ochengi* NPR-13 IQMYF<sup>K</sup>LLNVHAIAMTSIV<sup>W</sup>NPLLYF<sup>W</sup>MSKR<sup>H</sup>RKTF<sup>K</sup>EDMIGAGN<sup>-</sup>YR--NNE<sup>L</sup>K<sup>L</sup>M<sup>K</sup>R<sup>L</sup>CE<sup>P</sup>R--SPQ<sup>P</sup>GNHYD<sup>Q</sup>SDRH-----NFR<sup>R</sup>GTLD<sup>P</sup>TC  
*L. loa* NPR-13 IQMYF<sup>K</sup>LLNVHAIAMTSIV<sup>W</sup>NPLLYF<sup>W</sup>MSKR<sup>H</sup>RKAF<sup>K</sup>EDMIGTGN<sup>Y</sup>YR--NNE<sup>M</sup>RLM<sup>K</sup>R<sup>F</sup>FI<sup>S</sup>K--SPQ<sup>P</sup>NNLVY<sup>K</sup>Q<sup>N</sup>HR-----NFR<sup>R</sup>GTLD<sup>P</sup>TC  
*A. suum* NPR-13 IQMYF<sup>K</sup>LLNVHAIAMTSIV<sup>W</sup>NPLLYF<sup>W</sup>MSKR<sup>H</sup>RRLK<sup>Y</sup>DM<sup>F</sup>SLTN<sup>-</sup>PR--H<sup>I</sup>QL<sup>G</sup>V<sup>L</sup>GR<sup>F</sup>T<sup>P</sup>SP<sup>S</sup>FN<sup>V</sup>IY<sup>R</sup>RT<sup>V</sup>ER<sup>H</sup>MRN-----NFR<sup>R</sup>GTLD<sup>P</sup>TC  
*A. caninum* NPR-13 -----LQ<sup>R</sup>HRRAL<sup>K</sup>DDMT<sup>W</sup>LTN<sup>V</sup>RR--HTN<sup>V</sup>GV<sup>L</sup>SR<sup>F</sup>AP<sup>S</sup>PS<sup>V</sup>SLV<sup>Y</sup>RR<sup>T</sup>LER<sup>H</sup>ISV<sup>G</sup>-----NFR<sup>R</sup>GTLD<sup>P</sup>TC  
*N. brasiliensis* NPR-13 EQMYF<sup>K</sup>LMNAHAIAMTSIV<sup>W</sup>NPLLYF<sup>W</sup>MSKR<sup>H</sup>RRLK<sup>D</sup>DM<sup>T</sup>W<sup>L</sup>TN<sup>A</sup>RR--HTN<sup>V</sup>GV<sup>L</sup>SR<sup>F</sup>TP<sup>S</sup>PS<sup>V</sup>SLV<sup>Y</sup>RR<sup>T</sup>LER<sup>H</sup>IG<sup>V</sup>N-----NFR<sup>R</sup>GTLD<sup>P</sup>TC  
*H. contortus* NRP-13 EQMYF<sup>K</sup>LLNVHAIAMTSIV<sup>W</sup>NPLLYF<sup>W</sup>MSKR<sup>H</sup>RRLK<sup>D</sup>DM<sup>T</sup>W<sup>L</sup>TN<sup>V</sup>RR--HTN<sup>V</sup>GV<sup>L</sup>SR<sup>F</sup>AP<sup>S</sup>PS<sup>V</sup>SLI<sup>Y</sup>RR<sup>T</sup>LER<sup>H</sup>IG<sup>V</sup>T-----NFR<sup>R</sup>GTLD<sup>P</sup>TC  
*C. elegans* NPR-13 DQMYF<sup>K</sup>LLNVHAIAMTSIV<sup>W</sup>NPLLYF<sup>W</sup>MSKR<sup>H</sup>RRLK<sup>D</sup>DM<sup>T</sup>W<sup>L</sup>TN<sup>A</sup>RR--HTN<sup>V</sup>GV<sup>L</sup>SR<sup>F</sup>TP<sup>S</sup>PS<sup>V</sup>SV<sup>V</sup>Y<sup>R</sup>RT<sup>L</sup>ER<sup>H</sup>IG<sup>V</sup>N-----HFR<sup>R</sup>GTLD<sup>P</sup>TC  
*S. ratti* NPR-13 TERYF<sup>I</sup>TL<sup>C</sup>ANI<sup>I</sup>AMTSI<sup>I</sup>TN<sup>P</sup>MLY<sup>F</sup>W<sup>L</sup>SKR<sup>H</sup>RRLK<sup>D</sup>DM<sup>F</sup>W<sup>L</sup>TN<sup>V</sup>RRN--QQ<sup>N</sup>I<sup>G</sup>L<sup>D</sup>Q<sup>F</sup>EPS---SLL<sup>Y</sup>K<sup>K</sup>S<sup>Y</sup>PL<sup>T</sup>ISS<sup>F</sup>---HQ<sup>N</sup>NR<sup>R</sup>GTLD<sup>P</sup>TC  
*B. xylophilus* NPR-13 IQMYF<sup>K</sup>LLNAHAVAM<sup>S</sup>SIV<sup>S</sup>NPLLYF<sup>W</sup>MSKR<sup>H</sup>RRLK<sup>D</sup>DM<sup>F</sup>W<sup>L</sup>TN<sup>V</sup>RR--Q<sup>H</sup>Q<sup>M</sup>GL<sup>L</sup>E<sup>K</sup>F<sup>A</sup>P<sup>S</sup>PS<sup>V</sup>G<sup>I</sup>M<sup>Y</sup>R<sup>K</sup>S<sup>L</sup>ER<sup>H</sup>LN-----LFR<sup>R</sup>GTLD<sup>P</sup>TM  
*G. pallida* NPR-13 NNMYF<sup>K</sup>LLNVHAVAMTSIV<sup>S</sup>NPLLYF<sup>W</sup>MSKR<sup>H</sup>RRLK<sup>D</sup>DM<sup>F</sup>W<sup>L</sup>TN<sup>A</sup>RRQQ<sup>Q</sup>Q<sup>N</sup>V<sup>G</sup>GL<sup>L</sup>N<sup>K</sup>FT<sup>P</sup>SP<sup>S</sup>I<sup>G</sup>LL<sup>Y</sup>R<sup>K</sup>N<sup>V</sup>ER<sup>H</sup>LQ<sup>N</sup>AAK<sup>Y</sup>NQQ<sup>R</sup>RG<sup>T</sup>L<sup>G</sup>D<sup>P</sup>TC  
*M. hapla* NPR-13 IQMYF<sup>K</sup>LLNVHAVAMTSIV<sup>S</sup>NPLLYF<sup>W</sup>MSKR<sup>H</sup>RRLK<sup>D</sup>DM<sup>F</sup>W<sup>L</sup>TN<sup>A</sup>RRQQ<sup>N</sup>H<sup>V</sup>G<sup>G</sup>L<sup>L</sup>A<sup>K</sup>FT<sup>P</sup>SP<sup>S</sup>I<sup>G</sup>LL<sup>Y</sup>K<sup>K</sup>S<sup>L</sup>ER<sup>H</sup>LQ<sup>N</sup>ATAK<sup>Y</sup>NPY<sup>R</sup>RG<sup>T</sup>LAD<sup>P</sup>TT  
*M. incognita* NPR-13 IQMYF<sup>K</sup>LLNVHAVAMTSIV<sup>S</sup>NPLLYF<sup>W</sup>MSKR<sup>H</sup>RRLK<sup>D</sup>DM<sup>F</sup>W<sup>L</sup>TN<sup>A</sup>RRQQ<sup>N</sup>H<sup>V</sup>G<sup>G</sup>L<sup>L</sup>A<sup>K</sup>FT<sup>P</sup>SP<sup>S</sup>I<sup>G</sup>LL<sup>Y</sup>K<sup>K</sup>S<sup>L</sup>ER<sup>H</sup>LQ<sup>N</sup>ATAK<sup>Y</sup>NPY<sup>R</sup>RG<sup>T</sup>LAD<sup>P</sup>TT

Consensus IQMYF<sup>K</sup>LLNVHAIAMTSIV<sup>W</sup>NPLLYF<sup>W</sup>MSKR<sup>H</sup>RRLK<sup>D</sup>DM WLTN RR NN VGLL RF P<sup>S</sup>P<sup>S</sup>V<sup>S</sup>L<sup>L</sup>Y<sup>R</sup>K<sup>T</sup>L<sup>E</sup>R<sup>H</sup>L NFR<sup>R</sup>GTLD<sup>P</sup>TC

*B. malayi* NPR-13 -----  
*W. bancrofti* NPR-13 ITA<sup>E</sup>R-AFA<sup>H</sup>I<sup>H</sup>AN<sup>C</sup>FLLV<sup>P</sup>L<sup>L</sup>PLY<sup>O</sup>A  
*D. immitis* NPR-13 ITA<sup>E</sup>T-AFA<sup>H</sup>M<sup>H</sup>AS<sup>C</sup>FLLV<sup>P</sup>L<sup>L</sup>PLY<sup>O</sup>A  
*O. volvulus* NPR-13 ITA<sup>E</sup>T-AFA<sup>H</sup>M<sup>H</sup>AN<sup>C</sup>FLLV<sup>P</sup>L<sup>L</sup>PLY<sup>O</sup>S  
*O. ochengi* NPR-13 ITA<sup>E</sup>T-AFA<sup>H</sup>M<sup>H</sup>AN<sup>C</sup>FLLV<sup>P</sup>L<sup>L</sup>PLY<sup>O</sup>S

|                               |                                                                   |
|-------------------------------|-------------------------------------------------------------------|
| <i>L. loa</i> NPR-13          | ITAEK-AFAHMHANCFLLVPLIPLYQA-----                                  |
| <i>A. suum</i> NPR-13         | MQSEK-ALADMHANCFLLVPLMPLCRSEVNVSDSRIGLRSNDRQIVIHPSQ-----          |
| <i>A. caninum</i> NPR-13      | MSRER-AQADLHSDCFLLVPLMPLCQSV-----                                 |
| <i>N. brasiliensis</i> NPR-13 | MSRER-AQADLHSNCFLLVPLMPLCQSLNRRNSHLTIEDHRSGHV-----                |
| <i>H. contortus</i> NRP-13    | TMRER-AQADLHSNCFLLVPLMPLCQSVSRRDSRLTID-----                       |
| <i>C. elegans</i> NPR-13      | TSRERSLPREIQSNCFLLVPLMPLCQSVTRKNSHLAINRDGIVIPQANGSSRRPSSVNTNSTRDW |
| <i>S. ratti</i> NPR-13        | ATRDD-QLEDVKAACFLLVPLIMPFCKE-----                                 |
| <i>B. xylophilus</i> NPR-13   | MSRER-SLQEMHANCFLLVPLMPLC-----                                    |
| <i>G. pallida</i> NPR-13      | ISRER-ALQEMHANCFLLVPLMPLCVANATTLQRHH-----                         |
| <i>M. hapla</i> NPR-13        | LGREK-ALQEMHANCFLLVPLMPLCVANQQHLTTNRREI-----                      |
| <i>M. incognita</i> NPR-13    | LGREK-VLQEMHANCFLLVPLMPLCVANQQRLATNQREISNNNNINLNFKRQKHPKFVCEA---- |

Consensus ITRER A ADMHANCFLLVPLMPLCQS

## 12. NPR-22 homologues

*T. spiralis* NPR-22 -----LTADESAVAVVVYLLITVVIIGNATVIFLIGHFPLRLPTNALIANLALADLLMA  
*T. muris* NPR-22 -----GNVVVIFVVRFRMRPTNALIANLALADTLVA  
*A. suum* NPR-22 -----LAFLYSGLSIVVICNSLIVLVILYFRRLRTATNLIILNLAADLMIS  
*A. caninum* NPR-22 -----ADLLIA  
*N. brasiliensis* NPR-22 -----PSQKNFYFQVLCICFYNI LCVCSVYGNFLVILVILYFRRLRTATNLIIFNLAADLLIA  
*H. contortus* NPR-22 MDEGGIGSSLLSRIITTTASEIMMRNEPTTENTPAVQEMNHIYHLTPSMKMLCILFVSYLCVCCVYGNVILVILVIVYFRRLRTATNLIILNLAADLLIS  
*C. elegans* NPR-22 -----VILYILLSCIAFIGNLMIIIVILYFRKLTGTNMLIMNLAADIMIA  
*S. ratti* NPR-22 -----MNDSAEVLELQYLCPTCKVAVVLYTTLSTMAFIGNSLIVAVIYFRRLHATNMLIMNLAADLMIS  
*B. xylophilus* NPR-22 -----MIEQTLEYSNQPTQSGSENVPIAVQQLCLTCKLAILLSYSTLSLIFVGNALILAVFFRFKRLRPTNMLIANLAIGDLMVS  
*G. pallida* NPR-22 -----LKWIFNSKEFN--KLKNFKINLINLNFILIKLKNKYIFILFTSIYMHIIVGNALILAVFLRFKRLRPTNMLIANLAIGDLMIS  
*M. hapla* NPR-22 -----VGNALILAVFLRFKRLRPTNMLIANLAIGDLMIS  
*M. incognita* NPR-22 -----VGNALILAVFLRFKRLRPTNMLIANLAIGDLMIS

Consensus

L IL YS L V A IGNALII VILYFKRLRT TNMLI NLAIAADLMIS

*T. spiralis* NPR-22 LLCIPFSFVSTLILQY--WPFQWFLCKVINFSQAVTVMASAYTLIAISLDRFPAILLPMSPNVKMTNRKATLCVLLVVTVAIVIAFPLLMVLTLEPS-EET  
*T. muris* NPR-22 LLCIPFSLASTLLEY--WPFQWFLCKVIHFSQAVTVMASAYTLIAISVDRFCGILFPMSTRALTRRKAALVIAIVTWVAIAAFPLLMVLSLAASPPD  
*A. suum* NPR-22 VLCMPFSYWHVLIIFSDQRWIFGAIFCKLFAFLQATAVFLSSWTLVAISFDRFTAIMFMSPPWRLTRRRALYLVAITWIFSLIMAPLFYVNOIQR---R  
*A. caninum* NPR-22 -----VFGSAMCSLLSFPFG-AVFLSSWTLVVISFDRWMAIMFVLSPSMRLTRKRAVYLVLATWAFSITMALPLFLVAQITTT---T  
*N. brasiliensis* NPR-22 VFCIPFSYQVLIIFDQRWVFGSAMCSLLSFFK-----  
*H. contortus* NPR-22 VFCIPFSYQVLIIFDQRWVFGSAMCSLLSFFCGIAVFLSSWTLVVISFDRWMAIMFVLSPSMRLTRRRAVYLVLATWAFSITMALPLFLVSKHTHT---T  
*C. elegans* NPR-22 VFCIPFSYQVLIYDQRWVFGSMMSLLAFLQAMAVFLSAWTLVVISFDRWMAIMFLLTPTNRIITRRRALYLVAATWIFSLIMALPLIFTRFFED--Q  
*S. ratti* NPR-22 LICMPFSYWHVLIIFEDSKWIFGSLFCKLLNFQATAVFSWTLVATRFDRCLAIFVMSRWNLNKKRALYVIFITIIWFFSLLMACPLYFANEVWSHEGN  
*B. xylophilus* NPR-22 LFCMPLSYWHVLIIFEDQRWIFGAFCLKIFNQLQASAVFLSSWTLVVISFDRFMAIMFVMSPPWRLTRKRAFLLIGTWVFSLAMALPLLIVNQTEAS--A  
*G. pallida* NPR-22 VFCIPLSYWHVLIIFEDQRWIFGAFCLKCFNYLQATAVFLSSWTLVAISFDRFMAIQFAMSPWLKMTRRRALYALIGTWVFSLGALPLLIVNKLSHS--S  
*M. hapla* NPR-22 LFCIPLSYWHVLIIFEDQRWIFGAFCLKTFNYLQATAVFSWTLVVAISFDRFMAIQFMSPPWLKMNRRKRALYATLITWGFSLIMALPLLIVNQLESST--T  
*M. incognita* NPR-22 LFCIPLSYWHVLIIFEDQRWIFGAFCLKTFNYLQATAVFSWTLVVAISFDRFMAIQFMSPPWLKMNRRKRALYATLITWGFSLIMALPLLIVNQLESST--S

Consensus

VFCIPFSYWHVLIIFEDQRWIFGAFCLKLLNFLQATAVFLSSWTLVAISFDRFMAIMFVMSPPWRLTRRRALYLVLITW FSLIMALPLLIVN L S T

*T. spiralis* NPR-22 GDVTHCIENITWT---ANETTGEYEYSLAAMLQYFVPLLVLITLYAGIGMKIWFHVPGEQGYAGQCN-----RERKTLVKKVIPTMFTVITAVY  
*T. muris* NPR-22 DTILYCAENITW----ANETTGEYEYSLAAMCLQYFVPLLVLITLYAGIGLKLWFS----EGHAGRFS-----RQRKSMVKKVLPMTFIVTIVY  
*A. suum* NPR-22 DGVDTCIEYGWQYLES-KFGDGITHYVGTIVVFSLQYCLPLTVLIIISYASIGVKMWNSS--RVPGVQP-----STRCVVNERHESVKKMIRMVLLVSALY  
*A. caninum* NPR-22 GGIKRDEDWTAVEAF---IPGSRRLYSYLLVLVQYVPLTVLIIITYFVIGKMWNS--RIPGPTS-----STKKVMERHESVKKLIPMVLISAMF  
*N. brasiliensis* NPR-22 -----  
*H. contortus* NPR-22 DGIKRDEDWSS-----QSRRLYSYLLVLVQYVPLTVLIIITYFVIGKMWNS--RIPGPTS-----STKKVMERQESVKKLIPMVLISAMF  
*C. elegans* NPR-22 DGLPNCGENITYFGDS---GEQVRKYSSMLLILQYVVPQAVLIIITYTHIGIKMWNS--RVPGMQNG-----ATKKMIVDRHESVKKLIPMVLISALF  
*S. ratti* NPR-22 DNTDTCVEKWNLLKVFSGDETKIVSLNKSLEFVLQYCMPLVILVITYYIIGFKMWFS--ETPGADSCSQASKRNTKTLIQERHESVKKLIPMVLISALY  
*B. xylophilus* NPR-22 LDVETCQEKWELLSPL-GDVQIVHSYTSALFALQYCLPLFVLVITYYFVIGLKMWNS--KVPQADRT-----QSTRYVYQGRHDSVKKLIPMVLISALY

*G. pallida* NPR-22 DGVDTCLEQWEHFFS-----ANFVSYMTSSLEGLQYCLPLAVLLITYTAIGCKMWNSSG-KVPGGES-----YLPPRASNKLKESVKKLIPMVLVLSALY  
*M. hapla* NPR-22 EGVDTCLEKWNDFFS-----DSFVSYLTSSLEFALQYCLPLSVLLITYTAIGCKMWNSS--KVPGR-----KESVKKLIPMVLVLSALY  
*M. incognita* NPR-22 EGVDTCLEKWNDFFS-----DSFVSYLTSSLEFALQYCLPLSVLLITYTAIGCKMWNSS--KVPG-----KLIPMVLVLSALY

Consensus DGVDTC E W LYSSSLF LQYCLPL VLIITYT IGMKWNSS KVPG S K VV ER ESVKKLIPMVLVLSALY

*T. spiralis* NPR-22 TFCWLEIN-VFNVVRAHPSVTDSTYVLHIWVAHTIAMVHCLVNPITYICRNRRFREGFAF-----  
*T. muris* NPR-22 SFCWLELN-VFNILRALYPLINEYTYVLHVWVAHTVAMVHCWVNPITYVSRNRRFREGFAY-----  
*A. suum* NPR-22 ACCWLPQNLLINILPLNPNIVSHPYILYFVWMAHTIAMLHSTVNPVFVYTRNARFQEGICYFI-RFLPCVK-----  
*A. caninum* NPR-22 AFCWLELLLLINVIIDLWPSVASWRVYIYIWWFSGHGLAMHSMVNPVYVFLRNARFREGFCYFS-RFLPCVHFQEFKLSAQAKSGRSR-----  
*N. brasiliensis* NPR-22 -----  
*H. contortus* NPR-22 AFCWLELLLLINVIIDLWPSVASWKFILYMWVFSHGLAMHSMVNPVYVFLRNARFREGFCYFS-RFLFVHFSGFKLITDQN-----  
*C. elegans* NPR-22 ALCWLELLLLINVIPEFYDINSWGYILYLWFAHGLAMHSMVNPITYFIRNARFREGFCFSSKLLPCLISFKELRLITDNTSRFRNRSRFSGVINPT  
*S. ratti* NPR-22 AGCWLPQNLLMNVLVN-DTDILTTPYILFIWVAHTIAMFHSVNPFIYYQNRMRREGLRYLL-RWLPCTVTFTEFKLLA-----  
*B. xylophilus* NPR-22 AGCWLPQNLLMNIWVTYDPTITSHPYILYIWWAHTIAMFHSVNPFIYYWQNRRIINEGVRYLL-RFLFPIHFDNFHYIEKPGCRAVKFVNMVAYMPVA  
*G. pallida* NPR-22 AVCWLPQNLLMNIWVTYDPSALNYPYIYIWWGAHTIAMFHSVNPVFVYVTRRRIHAALKHLL-RWLPCLRARNMAIAEFDARKR---LASSFRYVSA  
*M. hapla* NPR-22 AVCWLPQNLLMNIWVTYDPSALNYPYIYIWWGAHTIAMFHSVNPVFVYVTRRRIHAALKHLL-RWLPCLRARNMAIAEFDQATARQKAVTNSFKYPIG  
*M. incognita* NPR-22 AVCWLPQNLLMNIWVTYDPSALNYPYIYIWWGAHTIAMFHSVNPVFVYVATNRRRIHAALKHLL-RWLPCLRARNMAIAEFDQATARQKAVTNSFKYVPV

Consensus A CWLPQNLLMNILV PSI SHPYILYIWWAHTIAM HSI VNPVFVY RNRRFREGL Y L RFLPCV L E

*T. spiralis* NPR-22 -----  
*T. muris* NPR-22 -----  
*A. suum* NPR-22 -----  
*A. caninum* NPR-22 -----  
*N. brasiliensis* NPR-22 -----  
*H. contortus* NPR-22 -----  
*C. elegans* NPR-22 SSDEKPATSLTRYSRSGVLDROTCRSARFFEARPLVVVRNNSANSLA  
*S. ratti* NPR-22 -----  
*B. xylophilus* NPR-22 GKKVLHSTVSDSG-----  
*G. pallida* NPR-22 DQHRRRTTLQKTGSGSWHDATVPQ-----  
*M. hapla* NPR-22 DNRRLLTHTQKTISLTMD-----  
*M. incognita* NPR-22 DSRRLTLHTQKTISLSMD-----

Consensus

### 13. DMSR-1 homologues

|                               |                                                                                                            |
|-------------------------------|------------------------------------------------------------------------------------------------------------|
| <i>B. malayi</i> DMSR-1       | MNNLERCQTV-IIELEPENSIVYDWFYAIHTFYSPPIHTYLSIIVLCILGAMCNFCNIVVLTR-KRMRTPVNMTLTAMACCDTVVLF SNLIYTTHTYTLAFAFAN |
| <i>W. bancrofti</i> DMSR-1    | MNNLERCQTV-IIELEPENSIVYDWFYAVHNFYSPPIHTYLSIIVLCILGAMCNFCNIVVLTR-KRMRTPVNMTLTAMACCDTVVLF SNLIYTTHTYTLAFAFAN |
| <i>D. immitis</i> DMSR-1      | MNDLERCQTV-IIELEPERSIVYDWFYAIHNFYSPPIHTYLSIIVLCILGAMCNFCNIVVLTR-KRMRTPVNMTLTAMACCDTVVLF SNLIYTTHTYTLAFAFAN |
| <i>O. volvulus</i> DMSR-1     | -----CQTV-IIELEPERSIVYDWFYAIHTFYRPIHAYLSIIVLCILGAMCNFCNIVVLTR-KRMRTPVNMTLTAMACCDTVVLF SNLIYTTHTYTLAFAFAN   |
| <i>O. ochengi</i> DMSR-1      | MSNLKRCQTV-IIELEPERSIVYDWFYAIHTFYRPIHAYLSIIVLCILGAMCNFCNIVVLTR-KRMRTPVNMTLTAMACCDTVVLF SNLIYTTHTYTLAFAFAN  |
| <i>L. loa</i> DMSR-1          | MNTLERCQTV-IIELEPENSIVYDWFYAIHTFYSPPIHTYLSIIVLCILGAMCNFCNIVVLTR-KRMRTPVNMTLTAMACCDTVVLF SNLIYTTHTYTLAFAFAN |
| <i>A. suum</i> DMSR-1         | MNALDQCQTV-IVQLPAESIVYEWLYGIHTFYRPIHTYLSIIVLCILGAMCNFCNIVVLTR-KRMRTPVNMTLTAMACCDTVVLF SNLIYTTHTYTLAFAFAN   |
| <i>A. caninum</i> DMSR-1      | -----R-----KRMRTPVNMTLTAMACCDTVVLF SNLIYTTHTYTLAFAFAN                                                      |
| <i>N. brasiliensis</i> DMSR-1 | -MDTDQCQTV-LVHLEPNHNVYDFPREVHLYFKYPIHTYLSIIVLCILGAMCNFCNIVVLTR-KRMRTPVNMTLTAMACCDTVVLF SNLIYTTHTYTLAFAFAN  |
| <i>H. contortus</i> DMSR-1    | -MDADQCQTV-LVHLEPNHNVYDFPREVHLYFKYPIHTYLSIIVLCILGAMCNFCNIVVLTR-KRMRTPVNMTLTAMACCDTVVLF SNLIYTTHTYTLAFAFAN  |
| <i>C. elegans</i> DMSR-1      | -MEFTECKIT-FIHLFDKSFYLDVFSVYNFYHPIHAYLSIIVLCILGAMCNFCNIVVLTR-KRMRTPVNMTLTAMACCDTVVLF SNLIYTTHTYTLAFAFAN    |
| <i>S. ratti</i> DMSR-1        | -----CSTV-IIELEPENSIVYDILKTVSDYFKYPIHAYLSIIVLCILGAMCNFCNIVVLTR-KRMRTPVNMTLTAMACCDTVVLF SNLIYTTHTYTLAFAFAN  |
| <i>B. xylophilus</i> DMSR-1   | -----CQTV-VFQLNESVIYDRLADLHAFYKPIHTYLSIIVLCILGAMCNFCNIVVLTR-KRMRTPVNMTLTAMACCDTVVLF SNLIYTTHTYTLAFAFAN     |
| <i>G. pallida</i> DMSR-1      | MDPLHQCSID-VFQLDQSPFYELKTIKDFYKPIHTYLSIIVLCILGAMCNFCNIVVLTR-KRMRTPVNMTLTAMACCDTVVLF SNLIYTTHTYTLAFAFAN     |
| <i>M. hapla</i> DMSR-1        | MDLLQQCQTSFFQLTESWVYVLLAIKDFYKPIHTYLSIIVLCILGAMCNFCNIVVLTR-KRMRTPVNMTLTAMACCDTVVLF SNLIYTTHTYTLAFAFAN      |
| <i>M. incognita</i> DMSR-1    | MDLLQQCQTSFFQLTESWVYVLLAIKDFYKPIHTYLSIIVLCILGAMCNFCNIVVLTR-KRMRTPVNMTLTAMACCDTVVLF SNLIYTTHTYTLAFAFAN      |
| Consensus                     | M L CQTV II LPE SIVYDWF AIH FYKPIHTYLSIIVLCILGAMCNFCNIVVLTR KRMRTPVNMTLTAMACCDTVVLF SNLIYTTHTYTLAFAFAN     |

|                               |                                                                                                      |
|-------------------------------|------------------------------------------------------------------------------------------------------|
| <i>B. malayi</i> DMSR-1       | CHPKQWSYGVAVFLVCHAHLSLIGHSSSIWLSVMLALIRYMTLRSRKKVNVVQIHLRHSYMAIAFVVFVTLNMTPNFLAYKIEEMKLGSETCNTTDTGNY |
| <i>W. bancrofti</i> DMSR-1    | CHPKQWSYGVAVFLVCHAHLSLIGHSSSIWLSVMLALIRYMTLRSRKKVNVVRIHLRHSYMAIAFVVFVTLNMTPNFLAYKIEEMKLGSETCNTTDTGNY |
| <i>D. immitis</i> DMSR-1      | CHPEQWSYGVAVFLVCHAHLSLIGHSSSIWLSVMLALIRYMTLRSRKKVNVVQIHLRHSYMAIAFVVFVTLNMTPNFLAYKIEEMRLSETCNTTDTGNY  |
| <i>O. volvulus</i> DMSR-1     | CHPEQWSYGVAVFLVCHAHLSLIGHSSSIWLSVMLALIRYMTLRSRKKVNVVQIHLRHSYMAIAFVVFVTLNMTPNFLAYKIEEMRLSETCNTTDTGNY  |
| <i>O. ochengi</i> DMSR-1      | CHPEQWSYGVAVFLVCHAHLSLIGHSSSIWLSVMLALIRYMTLRSRKKVNVVQIHLRHSYMAIAFVVFVTLNMTPNFLAYKIEEMRLSETCNTTDTGNY  |
| <i>L. loa</i> DMSR-1          | CHPKQWSYGVAVFLVCHAHLSLIGHSSSIWLSVMLALIRYMTLRSRKKVNVVQIHLRHSYMAIAFVVFVTLNMTPNFLAYKIEEMRLSETCNTTDTGNY  |
| <i>A. suum</i> DMSR-1         | CHPRHWSYGVAVFLVCHAHLSLIGHSSSIWLSVMLALIRYMTLRSRGNMNGVQIHLRHSYMAIAFVVFVTLNMTPNFLAYKIEEMRLNETCEIKDESVR  |
| <i>A. caninum</i> DMSR-1      | CHPRHWSYGVAVFLVCHAHLSLIGHSSSIWLSVMLALIRYMTLRSRGNMNGVQIHLRHSYMAIAFVVFVTLNMTPNFLAYKIEEMRLNETCEIKDESVR  |
| <i>N. brasiliensis</i> DMSR-1 | CHPRHWSYGVAVFLVCHAHLSLIGHSSSIWLSVMLALIRYMTLRSRGNMNGVQIHLRHSYMAIAFVVFVTLNMTPNFLAYKIEEMRLNETCEIKDESVR  |
| <i>H. contortus</i> DMSR-1    | CHPRHWSYGVAVFLVCHAHLSLIGHSSSIWLSVMLALIRYMTLRSRGNMNGVQIHLRHSYMAIAFVVFVTLNMTPNFLAYKIEEMRLNETCEIKDESVR  |
| <i>C. elegans</i> DMSR-1      | CHPKHWSYGVAVFLVCHAHLSLIGHSSSIWLSVMLALIRYMTLRSRGNMNGVQIHLRHSYMAIAFVVFVTLNMTPNFLAYKIEEMRLNETCEIKDESVR  |
| <i>S. ratti</i> DMSR-1        | CHPRDWSYGVAVFLVCHAHLSLIGHSSSIWLSVMLALIRYMTLRSRGNMNGVQIHLRHSYMAIAFVVFVTLNMTPNFLAYKIEEMRLNETCEIKDESVR  |
| <i>B. xylophilus</i> DMSR-1   | CHPRHWSYGVAVFLVCHAHLSLIGHSSSIWLSVMLALIRYMTLRSRGNMNGVQIHLRHSYMAIAFVVFVTLNMTPNFLAYKIEEMRLNETCEIKDESVR  |
| <i>G. pallida</i> DMSR-1      | CVPKNWSYGVAVFLVCHAHLSLIGHSSSIWLSVMLALIRYMTLRSRGNMNGVQIHLRHSYMAIAFVVFVTLNMTPNFLAYKIEEMRLNETCEIKDESVR  |
| <i>M. hapla</i> DMSR-1        | CIPKHWSYGVAVFLVCHAHLSLIGHSSSIWLSVMLALIRYMTLRSRGNMNGVQIHLRHSYMAIAFVVFVTLNMTPNFLAYKIEEMRLNETCEIKDESVR  |
| <i>M. incognita</i> DMSR-1    | CVPKHWSYGVAVFLVCHAHLSLIGHSSSIWLSVMLALIRYMTLRSRGNMNGVQIHLRHSYMAIAFVVFVTLNMTPNFLAYKIEEMRLNETCEIKDESVR  |
| Consensus                     | CHPKHWSYGVAVFLVCHAHLSLIGHSSSIWLSVMLALIRYMTLRSRGNMNGVQIHLRHSYMAIAFVVFVTLNMTPNFLAYKIEEMRLNETCEIKDESVR  |

*B. malayi* DMSR-1 D-ASAYVPGVSDLAIQAHCLIFR-MAFWISGTVFKMTPCLLIS-SFVWLLMKILTRVQQNR--LKKLIYHSTRFYNG-KHESKKHRGQS-----

*W. bancrofti* DMSR-1 D-ASAYVPGVSDLAL<sup>E</sup>AHCL<sup>I</sup>FR-MAFWIS<sup>G</sup>TVFK<sup>I</sup>PCLL<sup>L</sup>S-SFVWLLMK<sup>I</sup>LTRV<sup>Q</sup>QNR--LKLL<sup>Y</sup>HSTRFY<sup>N</sup>G-KYES<sup>K</sup>KKNR<sup>G</sup>QS-----  
*D. immitis* DMSR-1 D-ASAY<sup>I</sup>PGVSDLAL<sup>E</sup>AHCL<sup>I</sup>FR-MAFWIS<sup>G</sup>TVFK<sup>I</sup>PCLL<sup>L</sup>S-SFVWLLMK<sup>I</sup>LTKV<sup>Q</sup>QNR--LKLFY<sup>H</sup>STHFC<sup>N</sup>G-KYHD<sup>K</sup>KDYQ<sup>R</sup>NRKNAID-----  
*O. volvulus* DMSR-1 D-AFAY<sup>I</sup>PGVSDLAL<sup>E</sup>AHCL<sup>V</sup>FR-MAFWIS<sup>G</sup>TVFK<sup>I</sup>PCLL<sup>L</sup>S-SFVWLLMK<sup>I</sup>LTKV<sup>Q</sup>QNR--LKLL<sup>Y</sup>NSRYC<sup>D</sup>GKKY<sup>D</sup>DKAYQ<sup>R</sup>NRK-----  
*O. ochengi* DMSR-1 D-AFAY<sup>I</sup>PGVSDLAL<sup>E</sup>AHCL<sup>V</sup>FR-MAFWIS<sup>G</sup>TVFK<sup>I</sup>PCLL<sup>L</sup>S-SFVWLLMK<sup>I</sup>LTKV<sup>Q</sup>QNR--LKLL<sup>Y</sup>NSRYC<sup>D</sup>GKKY<sup>D</sup>DKAYQ<sup>R</sup>NRK-----  
*L. loa* DMSR-1 D-AFAY<sup>I</sup>PGVSDLAL<sup>E</sup>AHCL<sup>I</sup>FR-MAFWIS<sup>G</sup>TVFK<sup>I</sup>PCLL<sup>L</sup>S-SFVWLLMK<sup>I</sup>LTRV<sup>Q</sup>QNR--VKLL<sup>H</sup>STYY<sup>N</sup>O-KYV<sup>G</sup>KKYC<sup>G</sup>KEK<sup>I</sup>PLIR<sup>I</sup>YQ<sup>L</sup>-----  
*A. suum* DMSR-1 Y-APAY<sup>I</sup>PGVSDMAV<sup>Q</sup>AYCL<sup>V</sup>FR-MAFWIS<sup>G</sup>TVFK<sup>V</sup>PCLL<sup>L</sup>T-LFVWLLMR<sup>I</sup>LNEV<sup>K</sup>QNR--LRL<sup>M</sup>EK<sup>S</sup>SRP<sup>S</sup>ND<sup>G</sup>SSPK<sup>M</sup>QADD-----  
*A. caninum* DMSR-1 G-AAAYLPGIAEIALAKHCLVFR-LVFWISGLVFKVIPCLLS-----  
*N. brasiliensis* DMSR-1 G-AAAYLPGIAEIALAQHCLVFR-LVFWISGLVFKVIPCLLS-LFVWLLGILK<sup>E</sup>VKANR--QRL<sup>L</sup>KNSRN<sup>S</sup>SV<sup>P</sup>ATAP<sup>A</sup>NGK--VTLV<sup>A</sup>SN-----  
*H. contortus* DMSR-1 G-AAAYLPGIAEIALAKHCLFR-LVFWISGLVFKVIPCLLS-LFVWLLGILK<sup>E</sup>VKANRE<sup>R</sup>L<sup>L</sup>KNSHH<sup>A</sup>MPP<sup>A</sup>NS--NGK--VVLV<sup>A</sup>H-----  
*C. elegans* DMSR-1 N-SPAYLPGIADIAKANSCLVFR-LSYWISGMVFKVIPCLLS-LFVWLLRILREV<sup>E</sup>NR--QRL<sup>L</sup>KNSQ<sup>H</sup>R-PPN<sup>Q</sup>TTT<sup>T</sup>NG<sup>Q</sup>RLS<sup>I</sup>SVAG<sup>N</sup>-----  
*S. ratti* DMSR-1 N-ASAYLTGISELAVNSCMVFR-LTFWMSGILFKVIPCLILT-LVWLLTRILNEV<sup>K</sup>QNR--LKL<sup>F</sup>KGS<sup>S</sup>KYSP<sup>P</sup>SESL<sup>T</sup>KHD<sup>N</sup>NLF<sup>I</sup>SS<sup>S</sup>P-----  
*B. xylophilus* DMSR-1 A-ALAYFPEVSDLAL<sup>E</sup>TNCLVFR-MAFWIS<sup>G</sup>TVFK<sup>I</sup>PCLL<sup>L</sup>T-LFVWLLTRILNEV<sup>K</sup>ENR--ARL<sup>M</sup>K-----GNC-----  
*G. pallida* DMSR-1 KNNDTAYVPGVAD--VAAD<sup>C</sup>LVFR-LAFWITGAVFQIFPCLLILTLLVSLLMRILREV<sup>R</sup>DNR--QRL<sup>F</sup>LAG<sup>R</sup>GAAA<sup>A</sup>SGGG-----  
*M. hapla* DMSR-1 RNHTAYVPGVAD--IASD<sup>C</sup>LVFR-LAFWITGAVFKIFPCLLILT-VLVSLLTQILKEV<sup>R</sup>TNR--QRL<sup>F</sup>FGG<sup>C</sup>SS<sup>S</sup>TFEAN<sup>V</sup>-----  
*M. incognita* DMSR-1 KNHTAYVPGVAD--IASD<sup>C</sup>LVFR-LAFWITGAVFKIFPCLLILT-VLVSLLTQILKEV<sup>R</sup>ANR--QRL<sup>F</sup>FGG<sup>C</sup>SS<sup>S</sup>TFEAN-----

Consensus A AYIPGVSDLALAAHCLVFR MAFWISGTVFKVIPCLLS LFWLLMKIL EVK NR LRL S G K

*B. malayi* DMSR-1 ----KTDTAKINTSIVYRADR<sup>T</sup>TRML<sup>L</sup>TILCVFLIT<sup>E</sup>LPQGIMMVL<sup>S</sup>GILPEAFRR<sup>H</sup>IYNSLGDLLD<sup>L</sup>SLC<sup>N</sup>SCTTF<sup>V</sup>IYCSM<sup>S</sup>EQFRNE<sup>F</sup>KQVFLP<sup>N</sup>S  
*W. bancrofti* DMSR-1 ----KIDTAKINTSIVYRADR<sup>T</sup>TRML<sup>L</sup>TILCVFLIT<sup>E</sup>LPQGIMMVL<sup>S</sup>GILPEAFRR<sup>H</sup>IYNSLGDLLD<sup>L</sup>SLC<sup>N</sup>SCTTF<sup>V</sup>IYCSM<sup>S</sup>EQFRNE<sup>F</sup>KQVFLP<sup>H</sup>S  
*D. immitis* DMSR-1 -----SCYSKINTDTIYRADR<sup>T</sup>TRML<sup>L</sup>TILCVFLIT<sup>E</sup>LPQGIMMVL<sup>S</sup>GILPEAFRR<sup>H</sup>IYNSLGDLLD<sup>L</sup>SLC<sup>N</sup>ACTTF<sup>V</sup>IYCSM<sup>S</sup>EQFRNE<sup>F</sup>KQVFLP<sup>N</sup>S  
*O. volvulus* DMSR-1 -----RTNASTVYRADR<sup>T</sup>TRML<sup>L</sup>TILCVFLIT<sup>E</sup>LPQGIMMVL<sup>S</sup>GILPEAFRR<sup>H</sup>IYNSLGDLLD<sup>L</sup>SLC<sup>N</sup>ACTTF<sup>V</sup>IYCSM<sup>S</sup>EQFRNE<sup>F</sup>KQVFLP<sup>Y</sup>S  
*O. ochengi* DMSR-1 -----RTNASTVYRADR<sup>T</sup>TRML<sup>L</sup>TILCVFLIT<sup>E</sup>LPQGIMMVL<sup>S</sup>GILPEAFRR<sup>H</sup>IYNSLGDLLD<sup>L</sup>SLC<sup>N</sup>ACTTF<sup>V</sup>IYCSM<sup>S</sup>EQFRN--KQVFLP<sup>Y</sup>S  
*L. loa* DMSR-1 IVVPRMINFINTSVVYRTDR<sup>T</sup>TRML<sup>L</sup>TILCVFLIT<sup>E</sup>LPQGIMMVL<sup>S</sup>GILPEAFRR<sup>H</sup>IYNSLGDLLD<sup>L</sup>SLC<sup>N</sup>ACTTF<sup>V</sup>IYCSM<sup>S</sup>EQFRNE<sup>F</sup>KQVFLP<sup>N</sup>S  
*A. suum* DMSR-1 --NHSFKQASHVRC--GERTDR<sup>T</sup>THMLLAI<sup>V</sup>FVFLVTEL<sup>P</sup>QGVMAVLSG<sup>M</sup>FSEEFRR<sup>H</sup>IYNNLGD<sup>L</sup>LDL<sup>L</sup>SLC<sup>G</sup>ACTTF<sup>V</sup>IYCSM<sup>S</sup>EQFRNE<sup>F</sup>RRVFLP  
*A. caninum* DMSR-1 -----S-----DRTTYMLIIMLVVFLVTEL<sup>P</sup>QGFALING-----  
*N. brasiliensis* DMSR-1 DQHKRTSSIRLAPPRGERADRT<sup>T</sup>NMLLAI<sup>V</sup>FVMLFTEMPQ<sup>G</sup>IMALLSG<sup>M</sup>ISEEFR<sup>H</sup>IYNNLGDLLD<sup>L</sup>FLS<sup>C</sup>EAC<sup>M</sup>SFIIYCSM<sup>S</sup>GQFRNE<sup>F</sup>HRVFP  
*H. contortus* DMSR-1 DKHHR<sup>T</sup>SSVGR--GERADRT<sup>T</sup>NMLLAI<sup>V</sup>FVMLFTEMPQ<sup>G</sup>IMALLSG<sup>M</sup>ISEEFR<sup>H</sup>IYNNLGDLLD<sup>L</sup>FLS<sup>C</sup>EAC<sup>M</sup>SFIIYCSM<sup>S</sup>GQFRNE<sup>F</sup>RRVFP  
*C. elegans* DMSR-1 EKLGR<sup>N</sup>SLGR--GERVDR<sup>T</sup>THMLLAI<sup>V</sup>AVMLVTEL<sup>P</sup>QGVMAVLSG<sup>M</sup>CSEEFRI<sup>I</sup>YNNLGD<sup>L</sup>LDL<sup>F</sup>SLC<sup>G</sup>SCCFIIYCSM<sup>S</sup>GQFRNE<sup>F</sup>HRVFP  
*S. ratti* DMSR-1 MPKMS<sup>S</sup>GK<sup>I</sup>SKG<sup>G</sup>KHAKTDR<sup>T</sup>TRML<sup>L</sup>TIVCVFLIT<sup>E</sup>LPQGVMAVLTG<sup>I</sup>FSDEFRI<sup>H</sup>IYNSFG<sup>D</sup>LDL<sup>M</sup>ALC<sup>N</sup>ACTTF<sup>V</sup>IYCT<sup>M</sup>SSQFR<sup>T</sup>EFO<sup>K</sup>VFMPEK  
*B. xylophilus* DMSR-1 -----RADR<sup>T</sup>TRMLLAI<sup>V</sup>CVFLVTEL<sup>P</sup>QGVMAVLTG<sup>I</sup>LSQEFR<sup>N</sup>IYNNVGD<sup>I</sup>LDL<sup>L</sup>SLC<sup>E</sup>ACTSFIIYCSM<sup>S</sup>GQFRNE<sup>F</sup>RRVFP  
*G. pallida* DMSR-1 -----SRTDR<sup>T</sup>TRMLLAI<sup>V</sup>CVFLIT<sup>E</sup>LPQGVMAVLTG<sup>M</sup>FSEEFHY<sup>N</sup>IYNRVGD<sup>I</sup>LDL<sup>L</sup>SLC<sup>N</sup>ACTSFIIYCT<sup>M</sup>SAQFRNE<sup>F</sup>RRVFLPAY  
*M. hapla* DMSR-1 -----HRTDR<sup>T</sup>TRMLLAI<sup>V</sup>CVFLVTEL<sup>P</sup>QGVMAVLSG<sup>M</sup>FSEEF<sup>R</sup>SHIYNNLGD<sup>I</sup>LDL<sup>L</sup>SLC<sup>N</sup>ALAS<sup>F</sup>IIYCSM<sup>S</sup>AQFRNE<sup>F</sup>RRVFLPTT  
*M. incognita* DMSR-1 -----RTDR<sup>T</sup>TRMLLAI<sup>V</sup>CVFLVTEL<sup>P</sup>QGVMAVLSG<sup>M</sup>FSEEF<sup>R</sup>SHIYNNLGD<sup>I</sup>LDL<sup>L</sup>SLC<sup>N</sup>ALAS<sup>F</sup>IIYCSM<sup>S</sup>AQFRNE<sup>F</sup>RRVFLPTT

Consensus R RADRTRMLLAI<sup>V</sup>CVFLIT<sup>E</sup>LPQGVMAVLSGILSEEFRRIYNSLGDLLD<sup>L</sup>SLC<sup>N</sup>ACTTF<sup>V</sup>IYCSM<sup>S</sup>GQFRNE<sup>F</sup>RRVFLP S

*B. malayi* DMSR-1 FFDHKL<sup>R</sup>WNL<sup>K</sup>RNYKES-----SS--HSTTD<sup>A</sup>SSKNA<sup>F</sup>LPRN<sup>V</sup>LD<sup>R</sup>NI<sup>E</sup>GVCP<sup>A</sup>VTAT<sup>S</sup>ELPMESS<sup>M</sup>TWSQ<sup>C</sup>AAEN<sup>N</sup>LPEK<sup>L</sup>NTN<sup>I</sup>GN<sup>T</sup>ENDE<sup>D</sup>AS  
*W. bancrofti* DMSR-1 FFDYKL<sup>R</sup>WK<sup>L</sup>KRNYKES-----SS--HSTTS<sup>A</sup>SFKNA<sup>F</sup>LPRN<sup>A</sup>LNR<sup>N</sup>IE<sup>G</sup>VCP<sup>A</sup>VTAT<sup>S</sup>ELPMESS<sup>M</sup>IWSQ<sup>Y</sup>-AEN<sup>N</sup>VE<sup>P</sup>EK<sup>S</sup>NR<sup>N</sup>IGN<sup>M</sup>VN<sup>D</sup>EG<sup>P</sup>S  
*D. immitis* DMSR-1 LFGFK<sup>L</sup>K<sup>W</sup>SK<sup>R</sup>DYK-----  
*O. volvulus* DMSR-1 LFGYK<sup>L</sup>K<sup>W</sup>SK<sup>Q</sup>G<sup>Y</sup>K<sup>Q</sup>P-----SSAQ<sup>S</sup>STGT<sup>N</sup>SK<sup>T</sup>NFLH<sup>W</sup>YV<sup>L</sup>-RNT<sup>K</sup>HNG<sup>P</sup>LV<sup>S</sup>VT<sup>S</sup>ELPMEG<sup>P</sup>W<sup>L</sup>NY<sup>V</sup>G----NDLE<sup>K</sup>LST<sup>N</sup>IGN<sup>I</sup>ENDE<sup>A</sup>YS  
*O. ochengi* DMSR-1 LFGYK<sup>L</sup>K<sup>W</sup>SK<sup>Q</sup>G<sup>Y</sup>K<sup>Q</sup>-----RNT<sup>K</sup>HNG<sup>P</sup>LV<sup>S</sup>VT<sup>S</sup>ELPMEG<sup>P</sup>W<sup>L</sup>NY<sup>V</sup>G----NDLE<sup>K</sup>LST<sup>N</sup>IGN<sup>I</sup>ENDE<sup>A</sup>CS

```

L. loa DMSR-1 LFQYKLRKLRQWNHKES-----SSSTHSSNGRNSKNIFLIPANILNRNTKDVCPMVTATSEILMESSLT-----
A. suum DMSR-1 SSVLQFLSRSNRRSSEPLVKQCYLRPSDAANGNTSTAERSITMTLVGVSASIRKVKTKSNNPPASVCTDSLQRMSSSDSVASPTPKSPPSTAAFNFQSAS
A. caninum DMSR-1 -----
N. brasiliensis DMSR-1 KSMHCLERP-VSVR-----RPSETY--TKMTYLKPTVYEN--GSSTYSELDRSGAVKVIQNSSSR-----LDIRGTPSPGFYGSST
H. contortus DMSR-1 KSMHCLERP-PSIR-----RPSDAY--TKMTYLRPTVYEN--GSSTYSELKNAVVKVIG-KLISNF-----IELSFGEIVN-SYGLSA
C. elegans DMSR-1 AKVRCIRMSSPSIR-----RPSDAYSTTKMTFLKPNIKNGMNGMNGTYSEDTRSASVKMVGIQVRRNSTEITRMTGCDISITPCSPMPTSFPPSP
S. ratti DMSR-1 LNNACKIPWNKRSR-----RESVPFTENK-----
B. xylophilus DMSR-1 AQVSCWWSPTAR-----RYSDALFSKTGTQFLQ-----
G. pallida DMSR-1 GRMKCWHRFV-----
M. hapla DMSR-1 QRVKCWHQLFVLTR-----RTRNDAKRNNENKLERKQES--GCE-----
M. incognita DMSR-1 QRVKCWHQLLVLTR-----RKRNDVEN-IKFEGROESGGGCE-----

```

Consensus

V CLK R S E L

```

B. malayi DMSR-1 LLHSSA-----
W. bancrofti DMSR-1 LLHSSA-----
D. immitis DMSR-1 -----
O. volvulus DMSR-1 V-----
O. ochengi DMSR-1 V-----
L. loa DMSR-1 -----
A. suum DMSR-1 TARISSASHETLDDKSDRLDEKAELLSESCPTKRPCAGILDNKKKGRLEARYHV
A. caninum DMSR-1 -----
N. brasiliensis DMSR-1 LNEAT--AAGFDDERSRLID-----
H. contortus DMSR-1 LEMVP--LTVTVIPNS-----
C. elegans DMSR-1 LPPIRSGEDESTDETSHELLNSSGPNSTASADGIRGHFQNI-----
S. ratti DMSR-1 -----
B. xylophilus DMSR-1 -----
G. pallida DMSR-1 -----
M. hapla DMSR-1 -----
M. incognita DMSR-1 -----

```

Consensus

## 14. DMSR-2 homologues

|                               |                                |                                                                                                                                                                                           |                                                                                                                           |                                                                                         |                                                                                           |                             |                           |                                               |
|-------------------------------|--------------------------------|-------------------------------------------------------------------------------------------------------------------------------------------------------------------------------------------|---------------------------------------------------------------------------------------------------------------------------|-----------------------------------------------------------------------------------------|-------------------------------------------------------------------------------------------|-----------------------------|---------------------------|-----------------------------------------------|
| <i>T. spiralis</i> DMSR-2     | MVAWIIDNETKGYAERADREAEDAAWVSSG | I AFTN                                                                                                                                                                                    | SYGF                                                                                                                      | I HAYL                                                                                  | S P I T                                                                                   | C C I G L A N A T T I V V L | T R P A M R T S - V N V I | L A A M A A C H A T T M L T Y L I F T L R T N |
| <i>T. muris</i> DMSR-2        | -----WIRNE                     | V F I A N A Y G Y V                                                                                                                                                                       | H G Y L S T L I C V L G I L A N F A T I A V L                                                                             | T R P A M R T S - V N I I                                                               | L A G I A A C H A V T M F T Y F I F T L R G M                                             |                             |                           |                                               |
| <i>B. malayi</i> DMSR-2       | -----I                         | P L A S A Y L P                                                                                                                                                                           | I H I F L Y H F L C I T G V F A N I A I V V V L L R P A M R K N H F N A F L I A I A I C D M T L M A S Y F I F K Q V E I   |                                                                                         |                                                                                           |                             |                           |                                               |
| <i>W. bancrofti</i> DMSR-2    | -----I                         | P L T S A Y L P                                                                                                                                                                           | H I F L Y H F L C I T G V F A N I A I V V V L L R P A M R K N H F N A F L I A I A I C D M T L M A S Y F I F K Q V E I     |                                                                                         |                                                                                           |                             |                           |                                               |
| <i>D. immitis</i> DMSR-2      | -----P                         | L A S A Y L P                                                                                                                                                                             | I H I F L Y H F L C I T G V F A N I A I V V V L L R P A M R K N H F N T F L I A I A I C D M T L M A S Y F I F K Q V E I   |                                                                                         |                                                                                           |                             |                           |                                               |
| <i>O. volvulus</i> DMSR-2     | -----P                         | L A S A Y F P                                                                                                                                                                             | I H I F L Y H V L C I T G V F A N I A I V V V L L R P A M R K N H F N T F L I A I A I C D M T L M A S Y F I F K Q V E I   |                                                                                         |                                                                                           |                             |                           |                                               |
| <i>O. ochengi</i> DMSR-2      | -----P                         | L A S A Y F P                                                                                                                                                                             | I H I F L Y H V L C I T G V F A N I A I V V V L L R P A M R K N H F N T F L I A I A I C D M T L M A S Y F I F K Q V E I   |                                                                                         |                                                                                           |                             |                           |                                               |
| <i>L. loa</i> DMSR-2          | -----I                         | P L A N A Y L P                                                                                                                                                                           | I H I F L Y H F L C I T G V F A N I A I V V V L L R P A M R R N H F N A F L I A I A I C D M T L M A S Y F I F K Q V E I   |                                                                                         |                                                                                           |                             |                           |                                               |
| <i>A. suum</i> DMSR-2         | -----SCMG--LNESAIEEQKVYAKL     | S S A V Q A Y T P                                                                                                                                                                         | V H V F V Y Q F L C I T G V F A N I S I I V V L L R P A M R K N P F N A F L I A I A I C D M T L M A F Y F I Y K Q V E I   |                                                                                         |                                                                                           |                             |                           |                                               |
| <i>A. caninum</i> DMSR-2.1    | -----MSCMGLALNASERLQLRDYYRQI   | L D F T A V F S E                                                                                                                                                                         | I H A Y L Y V F L C V V G V F A N I A I V V V L L R P A M R R S P F N L F L I C I A I C D A T L M A T Y L L Y K H V G L   |                                                                                         |                                                                                           |                             |                           |                                               |
| <i>A. caninum</i> DMSR-2.2    | -----MSCMGLALNVSELDELRDYYRQI   | L A F T N V F S Q                                                                                                                                                                         | I H S Y L Y V F L C V V G V F A N I A I V V V L L R P A M R R S P F N L F L I C I A I C D A T L M A T Y L L F K H V E M   |                                                                                         |                                                                                           |                             |                           |                                               |
| <i>N. brasiliensis</i> DMSR-2 | -----MSCMGLALNASELDELREYRQI    | L A F T N V F S Q                                                                                                                                                                         | I H S Y L Y V F L C V V G V F A N I A I V V V L L R P A M R R S P F N L F L I C I A I C D A T L M A T Y L L F K H V E F   |                                                                                         |                                                                                           |                             |                           |                                               |
| <i>H. contortus</i> DMSR-2    | -----MSCMG--LNTTELQEARDYFRQL   | L L F T A S F T M F                                                                                                                                                                       | H N Y I Y V F L C V I G V F A N I S I V V V L L R P A M R K S P F N L F L V V I A V C D A S L M A T Y L T Y K H V E I     |                                                                                         |                                                                                           |                             |                           |                                               |
| <i>C. elegans</i> DMSR-2      | -----MSCSVEVNETERDAMIQYVLEL    | E G E E I Q M Y D K                                                                                                                                                                       | I H V Y I Y Q I L C L L G V P L N V L V I V V L L R P Q M R K N P F N L Y L I V I A I C D L I L M A N Y Y I F H F I E R   |                                                                                         |                                                                                           |                             |                           |                                               |
| <i>S. ratti</i> DMSR-2        | -----DIRHNQNTIFQL              | L Q F V L S F                                                                                                                                                                             | N Q F V L I Y K F L C I L G V L S N I C I V V V L M R P A M R R N P F N V F L V A I A I C D M T L M A S Y F V F K Q V E D |                                                                                         |                                                                                           |                             |                           |                                               |
| <i>B. xylophilus</i> DMSR-2   | -----KESEKACPFFTQL             | N G L S E S Y N T F                                                                                                                                                                       | H R F T Y H F L C I T G V I A N I C F V V V L L R P T M R K N P F N L F L I A I A I C D M T L M A S Y F M Y K Q V E M     |                                                                                         |                                                                                           |                             |                           |                                               |
| <i>G. pallida</i> DMSR-2      | -----CTD--LDEESVKQSQIYYTEL     | S S L S E R Y D S F                                                                                                                                                                       | H K I I Y Q T I C I L G V I A N I C V V V V L L R P T M R K N P F N L F L I G I A I C D M S L M A S Y F I Y K Q I E I     |                                                                                         |                                                                                           |                             |                           |                                               |
| <i>M. incognita</i> DMSR-2    | -----O I E I                   |                                                                                                                                                                                           |                                                                                                                           |                                                                                         |                                                                                           |                             |                           |                                               |
| Consensus                     |                                | L P L A Y I H F L Y F L C I L G V F A N I A I V V V L L R P A M R K N F N L F L I A I A I C D M T L M A S Y F I F K Q V E I                                                               |                                                                                                                           |                                                                                         |                                                                                           |                             |                           |                                               |
| <i>T. spiralis</i> DMSR-2     | L T N K C Y F                  | P V Y D T Y F W L V F V V M                                                                                                                                                               | H A D L S V T L H S V S L W L T V D L A I V R Y L V L R R P                                                               | ---                                                                                     | Q A A T V A N A P R T G I W I M L V T V V A V C A C C F L N F L R N S I G A R P A P E S L |                             |                           |                                               |
| <i>T. muris</i> DMSR-2        | LLNECNVHI                      | S S Y M W Q A I V V T H A D L S V L I Q S I S L W L T V A L A V R Y L V L R R P                                                                                                           | ---                                                                                                                       | R A A V A N A A R I G L T I I A G T S V A V C G L C F L N F L R N S I Y E R - S F R M F |                                                                                           |                             |                           |                                               |
| <i>B. malayi</i> DMSR-2       | CH                             | P W Y F T Y F W I V F T Y F Y A I L S V F V H S S L W L T V N M A V L R Y L V L K R S A T S T S K I P I V N T F R A A F I A I I A A I V I S L L G S L P N M L R Y Q I R D S G Y L N V P   |                                                                                                                           |                                                                                         |                                                                                           |                             |                           |                                               |
| <i>W. bancrofti</i> DMSR-2    | CH                             | P W Y F T Y F W I V F T Y F Y A I L S V F V H S S L W L T V N M A V L R Y L V L K R S A T S T S K I P I V N T F R A A F I A I I A A I V I S L L G S L P N M L R Y Q I R D S G Y L N V P   |                                                                                                                           |                                                                                         |                                                                                           |                             |                           |                                               |
| <i>D. immitis</i> DMSR-2      | CH                             | P W Y F T Y F W I V F T Y F Y A I L S V F V H S S L W L T V N M A V L R Y L V L K R S A T S T S K I P I V N T F K A A F I A I I A A I I I S L L G S L P N M L R Y Q I R D S G Y L N V P   |                                                                                                                           |                                                                                         |                                                                                           |                             |                           |                                               |
| <i>O. volvulus</i> DMSR-2     | CH                             | P W Y F T Y C W I V F T Y F Y A I L S V F V H S S L W L T V N M A V L R Y L V L K R S S T S T S K I P I V N T F K A A F I A I I A A I I I S L L G S L P N M L R Y Q I R D S G Y L N V P   |                                                                                                                           |                                                                                         |                                                                                           |                             |                           |                                               |
| <i>O. ochengi</i> DMSR-2      | CH                             | P W Y F T Y C W I V F T Y F Y A I L S V F V H S S L W L T V N M A V L R Y L V L K R S S T S T S K I P I V N T F K A A F I A I I A A I I I S L L G S L P N M L R Y Q I R D S G Y L N V P   |                                                                                                                           |                                                                                         |                                                                                           |                             |                           |                                               |
| <i>L. loa</i> DMSR-2          | CH                             | P W Y F T Y F W I V F T Y F Y A I L S V F V H S S L W L T V N M A V L R Y L V L K R S A T S T S K I P I V N T F K A A F I A I I A A I I I S L L G S L P N M L R Y Q I R D S G Y L N V P   |                                                                                                                           |                                                                                         |                                                                                           |                             |                           |                                               |
| <i>A. suum</i> DMSR-2         | CH                             | P T Y F S Y F W I V F T Y M Y A I L S V F V H S V S L W F T V N M A L R Y L V L K R S S I S R S S I F N V N S F S A A F V A I V L A I L I S F L G S A P N M L R Y Q I R D N G F L D V P   |                                                                                                                           |                                                                                         |                                                                                           |                             |                           |                                               |
| <i>A. caninum</i> DMSR-2.1    | CH                             | P W F F S H A W M I Y T K F Y A M F S V F V H S A S L W F T V N M A V M R Y L V L Y R G S H S H R L P P C N S Y P A A C I A I V I C A V I A L I G S L P N M L R Y K I E L V R E M P V P   |                                                                                                                           |                                                                                         |                                                                                           |                             |                           |                                               |
| <i>A. caninum</i> DMSR-2.2    | CH                             | P W F F T H A W M I Y T R F Y A M F S V F V H S A S L W F T V N M A V M R Y L V L Y R G S H P H S R L P P C N G Y P A A C V A I A V G V V I A L I G S L P N M L R Y R I K F V E E M A V P |                                                                                                                           |                                                                                         |                                                                                           |                             |                           |                                               |
| <i>N. brasiliensis</i> DMSR-2 | CH                             | P W F F S H V W M I Y T R F Y A M F S V F V H S A S L W F T V N M A V M R Y L V L Y R G S H A H S R L P P C N G Y P A A C V A I I V G A V I A L I G S L P N M L R Y R I K F V K E M P V P |                                                                                                                           |                                                                                         |                                                                                           |                             |                           |                                               |
| <i>H. contortus</i> DMSR-2    | CH                             | P W Y F S F P W A I Y T K F Y A I F S V F V H S C S L W L T V N M A L R F L V L Y R G S R S E T R I P Q C N G F G A A F V A I V L A F A I A C I G C L E I F I R Y R I I E G E V G A V P   |                                                                                                                           |                                                                                         |                                                                                           |                             |                           |                                               |
| <i>C. elegans</i> DMSR-2      | CH                             | P Y Y Y F Y F W I Y T K L Y A I T S V L L H S L S L W L T V I M A H R Y L I V K N S N G A Q S N - I S W N Y Y K I T L L G I G A T G I S L I G S T P N T L R Y E I Q D N G L V G A E       |                                                                                                                           |                                                                                         |                                                                                           |                             |                           |                                               |
| <i>S. ratti</i> DMSR-2        | CN                             | P I Y Y T Y G W V F T L V Y A L L S V F V H S A S L W L T V N M A V L R F F V L R D S S N T G S - - S R W N Y R S A I I S V F L A L L F S L V G A A P N M L R Y E I E D K C P A E V P     |                                                                                                                           |                                                                                         |                                                                                           |                             |                           |                                               |
| <i>B. xylophilus</i> DMSR-2   | CH                             | P W Y F T F W I V F T Y G Y A V L S V F V H S A S L W L T V N M A V L R Y L V L K S G S S S R N W F R L N T Y K A A S F A V I S A V L L A A V G S A P N M L R Y Q I R N N Q L G V P       |                                                                                                                           |                                                                                         |                                                                                           |                             |                           |                                               |
| <i>G. pallida</i> DMSR-2      | CH                             | P L Y F T F T W I V F T Y S Y A L F S V L F H S A S L W I T V N M A V L R Y L V L K S S S N S R N W F R L N T Y K A A S F S I V A A I L L A A V G S A P N M L R Y Q I F Y K Q E V P V P   |                                                                                                                           |                                                                                         |                                                                                           |                             |                           |                                               |
| <i>M. hapla</i> DMSR-2        | CH                             | P L Y F T F T W I V F T Y S Y A L F S V L F H S A S L W I T V N M A V L R Y L V L K S S S N S R N W F R L N T Y K A A S F A I V A A I L L A A V G S A P N M L R Y Q V                     |                                                                                                                           |                                                                                         |                                                                                           |                             |                           |                                               |
| <i>M. incognita</i> DMSR-2    | CH                             | P W Y F T Y F W I V F T Y F Y A I L S V F V H S A S L W L T V N M A V L R Y L V L K R S S S S K I P I V N T F K A A I A I I A A I V I S L L G S L P N M L R Y Q I R D G L V P             |                                                                                                                           |                                                                                         |                                                                                           |                             |                           |                                               |
| Consensus                     | CH                             | P W Y F T Y F W I V F T Y F Y A I L S V F V H S A S L W L T V N M A V L R Y L V L K R S S S S K I P I V N T F K A A I A I I A A I V I S L L G S L P N M L R Y Q I R D G L V P             |                                                                                                                           |                                                                                         |                                                                                           |                             |                           |                                               |

*T. spiralis* DMSR-2 CPPAAVAHLAN-----QTVYEIKPSSWYTAEMIAINLITVGG--LVLKVLPCILLISIFIALLIHLLIDTRRQIRLSKKN-----IATGDRRTALL  
*T. muris* DMSR-2 DGCAGQARDN-----STTYEIDPPRWWTPELAINFWIVG--IMMKVLPCELLTIFIALLIHLLVDTRRQVRLAKTSN-----VATSDRRTALL  
*B. malayi* DMSR-2 AYCTSNQSAHYHYV--NPKVHAYNIAQPAWWTCTRWERFNFWAAG--LVLKLPCLMLTIFMTLLVRMLIEARERRIRLGRGQTG----DKSQAERTTTML  
*W. bancrofti* DMSR-2 TYCTSNQSAHYHYV--NPKVHAYNIAQPAWWTCTRWERFNFWAAG--LVLKLPCLMLTIFMTLLVRMLIEARERRIRLGRGQTG----DKSQAERTTTML  
*D. immitis* DMSR-2 MHCTTNQSAHYHYAD--NPKVHAYNIAQPSWWTCTRWERFNFWAAG--LVLKMLPCMLTIFMTLLVRMLIEARERRVRLGRGQLG----VKSQAERTTTML  
*O. volvulus* DMSR-2 PYCTTNQSAHYHYV--NPKVHAYNIAQPSWWTCTRWERFNFWAAG--LVLKMLPCMLTIFMTLLVRMLIEARERRMRLGRGQTG----VKSQAERTTTML  
*O. ochengi* DMSR-2 PYCTTNQSAHYHYV--NPKVHAYNIAQPSWWTCTRWERFNFWAAG--LVLKMLPCMLTIFMTLLVRMLIEARERRMRLGRGQTG----VKSQAERTTTML  
*L. loa* DMSR-2 AYCTSNQSAHYHYV--NPKVHAYNIAQPSWWTCTRWERFNFWAAG--LVLKLPCLMLTIFMTLLVRMLIEARERRIRLGRGQTG----GKSQAERTTTML  
*A. suum* DMSR-2 SYCTANGSTYAHYYTE--NSKVHAYNIAQPLWNCRWERFNFWAAG--LVLKLPCLMLTIFMTLLVRMLIEARERRIRLGGTAS----GKSQAERTTSMML  
*A. caninum* DMSR-2.1 KICL---SSKYHSSWTESSTLYKYDILQPSWVWCHWERINFWMAA--CVLKLPVCLLTIFMTLLVRMLIEARERRRLRGGVAM----GNLSQAERTTAML  
*A. caninum* DMSR-2.2 -----YAHYYTE--NPKVHAYNIAQPSWWTCTRWERFNFWAAG--LVLKMLPCMLTIFMTLLVRMLIEARERRIRLGRGQTG----VKSQAERTATML  
*N. brasiliensis* DMSR-2 KQCLR--SAKYHSSWLVTDITLYKYDILVQPTWVNCWERINFWMAA--CVLKLPVCLLTIFMTLLVRMLIEARERRSRLGGVPM----GNLSQAERTTAML  
*H. contortus* DMSR-2 GSCL---ETKYHSAWESDITLYRYDILVQPTWVNCWERINFWVA--CVLKLPVCLLTIFMTLLVRMLIEARERRRLRGGVPT----GNLSQAERTTAML  
*C. elegans* DMSR-2 DLCL---EGKYSTDWQPNMDIQFYGLSQPLWVNCWERINFWMAA--LILKLPVCLLTIFMTLLVRMLIEARERRSRLGGMGN----GNLSQAERTTAML  
*S. ratti* DMSR-2 PRCLVKGGKAYHYTTS--QIEAYQVVRPTFVNCNWERLTFWVAG--LLLKLPVCLLTIFMTLLVRMLIEARERRRLRGSRTVLCT--AKTQAERTTAML  
*B. xylophilus* DMSR-2 HHCLKNGSTYAKFYK--EDELNSYTIQOPVFNCSWERFSFWVAGGIMLKLIPCLLTIFMTLLVRMLIEARERRSRLCANNSGSASTGKTQAERTTAML  
*G. pallida* DMSR-2 TFCVEAGAKYAHSYQ--PQGLVHAYTLCQPAWVGCGLERFSFWTAGTIFMTLL-----VVRM  
*M. hapla* DMSR-2 DVCRAVNSKFAISFYDNPDIKVDAYVIVQPSFVWNTWERFSFWVAG--LLLKLPVCLLTIFMTLLVRMLIEAR-----ER  
*M. incognita* DMSR-2 -----

Consensus C N S YAH Y D VHAY IAQPSWW C WERFNFW AG LVLKLPCLLLTIFMTLLVRMLIEARERR RLC G KQAERTT ML

*T. spiralis* DMSR-2 LLIVFVFWLITQLPQGIITIANAFDQAI FDIYLAGDGFIDLLSLVNSCVSFPAYCIMSQMFHFDFMIVFCGLKRCFKINS-----  
*T. muris* DMSR-2 LLIVFVFWLITQLPQGIIVIANAFDKAIFHAYLTLGDIDWLLSLVNSCVSFPAYCIMSQMFHFDFMIVFGMRR-----  
*B. malayi* DMSR-2 TAIVAVFLVTEL PGGILVFAIGLKPGRIRYAMQYLGDFIDVLSLINSNFNIFLCALMSN--VREFLLTFGSCCPKLSENIGGIGSRALTMTHRITQSQRK-  
*W. bancrofti* DMSR-2 TAIVAVFLVTEL PGGILVFAIGLKPGRIRYAMQYLGDFIDVLSLINSNFNIFLCALMSN--VREFLLTFGSCCPKLSENISGIGSRALTMTHRITQAQRKE  
*D. immitis* DMSR-2 TAIVAVFLVTEL PGGILVFAIGLKPGRIRYAMQYLGDFIDVLSLINSNFNIFLCALMSN--VREFLLTFGSCCPKLSENINGIGPRTLMAHRITLSQRKE  
*O. volvulus* DMSR-2 TAIVAVFLVTEL PGGILVFAIGLKPGRIRYAMQYLGDFIDVLSLINSNFNIFLCALMSN--VREFLLTFGSCCPKLSENISGTGSRTLTMTSRI PQSQRRE  
*O. ochengi* DMSR-2 TAIVAVFLVTEL PGGILVFAIGLKPGRIRYAMQYLGDFIDVLSLINSNFNIFLCALMSN--VREFLLTFGSCCPKLSENISGTGSRTLTMTSRI PQSQRRE  
*L. loa* DMSR-2 TAIVAVFLVTEL PGGILVFAIGLKPGRIRYAMQYLGDFIDVLSLINSNFNIFLCALMSN--VREFLLTFGSCCPKLSENISGIGSRPLTIANRITQSQQKE  
*A. suum* DMSR-2 TAIVAVFLITEL PGGILVFAIGLKPGRIRYAMQYLGDFIDVLSLINSNFNIFLCALMSHVFRREFLLTFGSCCPKSESDVSGTKS---AAIRAIPSKRNGF  
*A. caninum* DMSR-2.1 TGIVAVFLVTEL PGGILGLAAGVNRPRMFIITIP LGNFFDLSLINSANFVLCALMSHVFRREFLQTF SMCCPQSENHSGAPITKPNK--KSLFASLT  
*A. caninum* DMSR-2.2 TAIVAVFLVTEL PGGILVFAIGLKPGRIRYAMQYLGDFIDVLSLINSNFNIFLCALMSN--VREFLLTFGSCCPKLSENISGTGSRTLTMTSRI PQSQRRE  
*N. brasiliensis* DMSR-2 TGIVAVFLITEL PGGVGLAAGVNRPRMFIITNPLGNFFDLSLINSANFVLCALMSHVFRREFLHTF SMCCPQSENHSGAPITKSSNR--TFQFFSSLA  
*H. contortus* DMSR-2 TGIVAVFLITEL PGGILGLAAGVNRPRMFIITVPLGNFFDLSLINSANFVLCALMSHVFRREFLHTF SMCCPQSENHSGAPITKPCNK--TFQFFSAFT  
*C. elegans* DMSR-2 TGIVAVFLITEL PGGVITFAAGANPRMFIITLQMNNVFDLSLINSANFVLCALMSHVFRREFLQTFVCCPQSENHSGAPINKTSNRSILSTFSNIA  
*S. ratti* DMSR-2 TIIVAVFLVTEL PGGIFVFLQGVYATEVIHLYLQGLDFLALFNSSVNFILYTTMSYQFRSQFIEFATYLPKTFERI SGSEINTNVLSSKISRDLGFK  
*B. xylophilus* DMSR-2 TMIVAVFLITEL PGGILVFAIGLKPGRIRYAMQYLGDFIDVLSLINSNFNIFLCALMSN--VREFLLTFGSCCPKLSENISGIGSRPLTIANRITQSQQKE  
*G. pallida* DMSR-2 LVIVAVFLITEL PGGILVFAIGLKPGRIRYAMQYLGDFIDVLSLINSNFNIFLCALMSN--VREFLLTFGSCCPKLSENISGIGSRPLTIANRITQSQQKE  
*M. hapla* DMSR-2 RSLVAVMHTITEL PGGILVFAIGLKPGRIRYAMQYLGDFIDVLSLINSNFNIFLCALMSN--VREFLLTFGSCCPKLSENISGIGSRPLTIANRITQSQQKE  
*M. incognita* DMSR-2 --IVAVFLITEL PGGILVFAIGLKPGRIRYAMQYLGDFIDVLSLINSNFNIFLCALMSN--VREFLLTFGSCCPKLSENISGIGSRPLTIANRITQSQQKE

Consensus TAIVAVFLVTEL PGGILVFAIGLKPGRIRYAMQYLGDFIDVLSLINSNFNIFLCALMSN--VREFLLTFGSCCPKLSENISGIGSRPLTIANRITQSQQKE

```

T. spiralis DMSR-2 -----
T. muris DMSR-2 -----
B. malayi DMSR-2 ELMAVKCPDEMN-----
W. bancrofti DMSR-2 LMAVVKCPDEINDNNNT-----
D. immitis DMSR-2 LMTVVKCSDEINDNNNT-----
O. volvulus DMSR-2 IMAVVKCNDEINDNNNT-----
O. ochengi DMSR-2 IMAVVKCNDEINDNNNT-----
L. loa DMSR-2 LMVVVKCPDEINDNNNT-----
A. suum DMSR-2 MPLRSSCQDGTN-----
A. caninum DMSR-2.1 PLRK--AKGFLPVPTNEREDRRTDD-----
A. caninum DMSR-2.2 LLAVVVKGPDEMN-----
N. brasiliensis DMSR-2 PKKAP-KDGFVPVPTN-----
H. contortus DMSR-2 PKKA--KDGFVAVPTN-----
C. elegans DMSR-2 KPKTSKKNGFLPVPTNCPDDKNTEQLAMN---
S. ratti DMSR-2 NNNGNFNTSKVHLLTATTTFQRKDLK GKIDEV
B. xylophilus DMSR-2 TPALPDPQNGARKAQ-----
G. pallida DMSR-2 -----
M. hapla DMSR-2 -----
M. incognita DMSR-2 -----

```

Consensus

M

## 15. DMSR-3 homologues

*B. malayi* DMSR-3  
*W. bancrofti* DMSR-3  
*D. immitis* DMSR-3  
*O. volvulus* DMSR-3  
*O. ochengi* DMSR-3  
*L. loa* DMSR-3  
*C. elegans* DMSR-3  
*N. brasiliensis* DMSR-3  
*H. contortus* DMSR-3  
*B. xylophilus* DMSR-3

```

-----
-----TSEEDALLAVHIKTAIILVLCAGITGHVVISIYILYSMIN-PNNLFMISMSTQVALCANFFYSLLFKYLSDVCCISQLWSYANVSTLL
-----QMSSEDEDEVLAVHIKTIILVLCAGINGHTISYIYLYSMISNNLFLIGMCTQVALCANFFYSLLFKYLSDVLCISQLWSYHAWVSTLL
-----QMSSEDEDELLLTTHIKTAIILALCTAGIAGHVVISIYILYSMIN-SNNLFLISMSTQIALCGNFFYSLLFKYLSDVYCCISQLWSHTWVSTLL
-----QMSSEDEDELLLTTHIKTAIILALCTAGIAGHVVISIYILYSMIN-SNNLFLISMSTQIALCGNFFYSLLFKYLSDVYCCISQLWSHTWVSTLL
-----SSDEDEALSAVHIKTAMILLCTAGIIGHVVISIYVLYSIIN-PNNLFMI
MSSNLTDTTTTVFETFLLEYGRILHPPVLLLCISGALGHMLTITTLSSMLNPTNMFLLISMCSQLALCINFLYSTFFKFMSDLQCQPPFFSYYLATITMH
-----YGRVVHPPVLLVLLCISGSLGHLVSIATLSSMMNPTNAFLISMSSQLALCGNFLYSTFFKQWASDELCSPPFFSYYMAKITMH
-----YGRVVHPPVLLVLLCISGSLGHLVSIATLSSMMNPTNAFLISMSSQLALCANFLYSTFFKQWASDELCPYPPFFSYYMTKITMH
-----ILHEPLAMTLCAGILGHFSFINVLSKMPNPTNLLISMSSQLLLCINFLYSTLYKYGSDELCLSSLWSYAWTGTLI
  
```

Consensus                    SEDE L AVHIKT IILILC AGILGHVISIYIYLSMINPTN LLI MSSTQALCANFFYSLLFKYLSDVLCISQLWSY WVSTLL

*B. malayi* DMSR-3  
*W. bancrofti* DMSR-3  
*D. immitis* DMSR-3  
*O. volvulus* DMSR-3  
*O. ochengi* DMSR-3  
*L. loa* DMSR-3  
*C. elegans* DMSR-3  
*N. brasiliensis* DMSR-3  
*H. contortus* DMSR-3  
*B. xylophilus* DMSR-3

```

V-----QKCLRIIMLNIIGAVLLCIPFFNSEVRKVASHWKCQVSSKSNLSVHEISF
VSVNASVVLYMSGVFHITLSIIRFISLNQL-----
VSVNASVVVHMSGVFHVVTLSIVRFISLNQVFLKIKSSEPWFSY----NKCLRTIVLNIIGAVLLCIPFFNSEVRKVPSSHDECSRRYPYKSNLSAHELSF
VSVNASIVVYMSGVFHVVTLSIVRFISLNQVFLKIKSSEPWFSY----SKCLRTIVLNIISAILLCTPFFNSEVRKVPSSHDECSARYPYKSNLSAHELSF
VSVNASIVVYMSGVFHVVTLSIVRFISLNQVFLKIKSSEPWFSY----SKCLRTIVLNIISAILLCTPFFNSEVRKVPSSHDECSARYPYKSNLSAHELSF
F SVTVSVLVHMSAVFHVVALSLIRFFSLAQISSVNSNVQWFTW----QKSRVAIIMYVSVIFLCIPLHFTSQVTEVSENEGCAERYPALRNKVAYQLSY
VSVTLSVLVHMAGVFHVVALSIIRYCSLSSLANINSSQQWFTYQFQKCRISLTIIFVSAIIGTPL-HFTSEVMVSE-NEGCAARRHPALRNASAFQLQF
VSVTLSVLVHMAGVFHVVALSIIRYFSLSALANIHSSQQWFT--FQKFRISLTIIFVSAIIGTPL-HFTSEVMVSE-NEGCAARRHPALRNATAFQLQF
ISVNVSVLVHMTGVFHVVALSIIRYMSLRQISQTTSHVQWFMNKVSMIYYLFDRLKFLGFINFKMGHTTSHAESNEPDENLVKYPISLVNTVHYLEF
  
```

Consensus                    VSVN SVLVHMSGVFHVV LSIIRFISL QL I SS WFSY                    K L TIILI IS I LCIP FF S V V                    E CS RYPAL N SAH LSF

*B. malayi* DMSR-3  
*W. bancrofti* DMSR-3  
*D. immitis* DMSR-3  
*O. volvulus* DMSR-3  
*O. ochengi* DMSR-3  
*L. loa* DMSR-3  
*C. elegans* DMSR-3  
*N. brasiliensis* DMSR-3  
*H. contortus* DMSR-3  
*B. xylophilus* DMSR-3

```

TNLASSTAIGRINFWLLGIICKFIPCIIMVMTVLLVQKLRQIQLLSIRFTSPIREKRRRCITY-----VELPQGIISVLSMAYASFAGSEL
TILASNTVGRINFGLLGTMCKLIPCAIMIVMSVLLIQKLRQIQLLSVRFTSRIREKRRRCITYIILI-IMINFVIIVELPQGIISVLSVKGASFAVSES
TILANNTVGRVNFGLLCTMCKLIPCAIMIVMTVLLIQKLRQIQLLSIRFTSRTRERQLRRITY-----VELPQGIISVLSIKGASFAVSES
TILANNTVGRVNFGLLCTMCKLIPCAIMIVMTVLLIQKLRQIQLLSIRFTSRTRERQLRRITY-----VELPQGIISVLSIKGASFAVSES
TQSIW---LRNINFWLFYLVAKVPVSIILCLMTCLILDQLKKIQVLSARFSSVERDKQHSRTTNMILA-IMILFIIIVELPQGVLAVLSTVT--SVKLIYE
SFPY---LQTLNFWLFNLCSKIIPSV-----
SSFPH---LQTLNFWLFNLCSKIIPSVILCLMTFMILAKLKRQIQLLSIRFTSVERDKQYQRTTKMILVVRVHILFIIIVELPQGLLVAATVT--ELQIIVA
SSNEQ---LQTLNFWLFGVCKLVPCSVLSMMTLLLLRELKLRRELSSRFQNVREDRQYSRTTNMIIV-IMVVFIVVELPQGVLTVAQSIIT-QIPYQDT
  
```

Consensus                    T                    L                    L NFWL G MCKLIPC IM VMTVLLI KLR IQLLS RFTS REK R T                    .....VELPQGIISVLSI S I E

|                        |        |                                                                                         |
|------------------------|--------|-----------------------------------------------------------------------------------------|
| <i>B. malayi</i>       | DMSR-3 | LGDLF ILSLLNSCVTFGLFCMSSRI RHA F-----                                                   |
| <i>W. bancrofti</i>    | DMSR-3 | -----                                                                                   |
| <i>D. immitis</i>      | DMSR-3 | LG-----                                                                                 |
| <i>O. volvulus</i>     | DMSR-3 | IGDLF IFSLLNSCITFALFCMSSRI RNA F-----                                                   |
| <i>O. ochengi</i>      | DMSR-3 | IGDLF IFSLLNSCITFALFCMSSRI RNA F-----                                                   |
| <i>L. loa</i>          | DMSR-3 | -----                                                                                   |
| <i>C. elegans</i>      | DMSR-3 | LGDLT LFTLLTSI I IFTLLCSMNGKIRSAFKELSCVRSIGRIFATMCPPSPVAASISGHDALLEHNTIIITNCHIDKSENYAVL |
| <i>N. brasiliensis</i> | DMSR-3 | -----                                                                                   |
| <i>H. contortus</i>    | DMSR-3 | LGECLMNGK I R S A FKEAPC F R W L E R-----                                               |
| <i>B. xylophilus</i>   | DMSR-3 | LGDLF I SLTLLTSI I I FGLF I MNSRI R D E F M E-----                                      |
| Consensus              |        | LGDL D SLL S I F L F S M R I R F                                                        |

16. DMSR-4 homologues

*A. suum* DMSR-4 -MCDRSARLFDMEDPYTSLFSIKGLQKFSKY<sup>Y</sup>SSV<sup>H</sup>EG<sup>L</sup>CMV<sup>L</sup>IC<sup>I</sup>IFG<sup>I</sup>MS<sup>N</sup>L<sup>V</sup>HIL<sup>V</sup>L<sup>T</sup>R<sup>A</sup>P<sup>L</sup>RRC<sup>A</sup>V<sup>N</sup>CV<sup>L</sup>T<sup>A</sup>V<sup>A</sup>V<sup>C</sup>D<sup>V</sup>L<sup>T</sup>MS<sup>S</sup>Y<sup>V</sup>V<sup>V</sup>Y<sup>L</sup>L<sup>R</sup>FR<sup>F</sup>F<sup>F</sup>AV<sup>S</sup>R<sup>G</sup>

*A. caninum* DMSR-4 -----

*N. brasiliensis* DMSR-4 -MCNEGRSLLDLNDLSLVSFVNRLEQFNKV<sup>Y</sup>TV<sup>F</sup>HR<sup>Y</sup>ACL<sup>V</sup>IC<sup>A</sup>IG<sup>V</sup>IS<sup>N</sup>AV<sup>H</sup>IL<sup>V</sup>L<sup>S</sup>RP<sup>R</sup>MR<sup>R</sup>CA<sup>V</sup>NC<sup>V</sup>L<sup>T</sup>A<sup>V</sup>A<sup>F</sup>C<sup>D</sup>V<sup>F</sup>T<sup>M</sup>T<sup>S</sup>Y<sup>I</sup>V<sup>V</sup>L<sup>F</sup>R<sup>R</sup>I<sup>Y</sup>Q<sup>G</sup>E<sup>N</sup>G

*H. contortus* DMSR-4 -----RV<sup>Y</sup>TV<sup>F</sup>HR<sup>Y</sup>ACL<sup>V</sup>IC<sup>L</sup>I<sup>G</sup>I<sup>S</sup>NA<sup>V</sup>HIL<sup>V</sup>L<sup>S</sup>RP<sup>R</sup>MR<sup>R</sup>CA<sup>V</sup>NC<sup>V</sup>L<sup>T</sup>A<sup>V</sup>A<sup>F</sup>C<sup>D</sup>V<sup>V</sup>T<sup>M</sup>T<sup>S</sup>Y<sup>T</sup>V<sup>V</sup>L<sup>F</sup>R<sup>R</sup>I<sup>Y</sup>Q<sup>G</sup>E<sup>Y</sup>G

*C. elegans* DMSR-4 MCQDEGGTLFDPQDPVAVSGLIDALEQFQS<sup>F</sup>Y<sup>T</sup>Y<sup>F</sup>HR<sup>Y</sup>ACL<sup>F</sup>IC<sup>I</sup>V<sup>G</sup>MF<sup>S</sup>NA<sup>L</sup>H<sup>I</sup>AV<sup>L</sup>S<sup>R</sup>P<sup>R</sup>MR<sup>R</sup>CA<sup>V</sup>NS<sup>V</sup>L<sup>T</sup>A<sup>V</sup>A<sup>F</sup>C<sup>D</sup>V<sup>I</sup>T<sup>M</sup>T<sup>S</sup>Y<sup>S</sup>I<sup>Y</sup>L<sup>M</sup>R<sup>F</sup>R<sup>F</sup>Y<sup>E</sup>T<sup>D</sup>H<sup>G</sup>

*B. xylophilus* DMSR-4 -----Y<sup>N</sup>A<sup>L</sup>HP<sup>L</sup>IC<sup>L</sup>F<sup>I</sup>C<sup>P</sup>L<sup>G</sup>I<sup>L</sup>AN<sup>L</sup>V<sup>H</sup>IL<sup>V</sup>L<sup>T</sup>RR<sup>R</sup>MR<sup>R</sup>CA<sup>V</sup>NS<sup>V</sup>L<sup>I</sup>G<sup>I</sup>A<sup>I</sup>C<sup>D</sup>V<sup>I</sup>T<sup>M</sup>T<sup>S</sup>Y<sup>F</sup>I<sup>Y</sup>I<sup>V</sup>R<sup>F</sup>E<sup>F</sup>A<sup>K</sup>GL<sup>T</sup>K

*M. hapla* DMSR-4 -----L<sup>F</sup>D<sup>R</sup>N<sup>S</sup>T<sup>T</sup>Q<sup>L</sup>A<sup>V</sup>I<sup>Q</sup>S<sup>L</sup>S<sup>K</sup>I<sup>A</sup>G<sup>I</sup>N<sup>L</sup>F<sup>V</sup>H<sup>P</sup>FL<sup>C</sup>L<sup>L</sup>I<sup>C</sup>P<sup>L</sup>G<sup>V</sup>L<sup>A</sup>N<sup>F</sup>V<sup>H</sup>IL<sup>V</sup>L<sup>T</sup>R<sup>R</sup>K<sup>M</sup>R<sup>R</sup>C<sup>A</sup>I<sup>N</sup>N<sup>C</sup>L<sup>I</sup>G<sup>I</sup>A<sup>V</sup>C<sup>D</sup>V<sup>F</sup>T<sup>M</sup>T<sup>S</sup>Y<sup>F</sup>I<sup>Y</sup>I<sup>V</sup>R<sup>F</sup>E<sup>I</sup>W<sup>T</sup>R<sup>I</sup>S

*M. incognita* DMSR-4 -----M<sup>A</sup>L<sup>D</sup>N<sup>T</sup>G<sup>L</sup>Y<sup>N</sup>L<sup>F</sup>V<sup>H</sup>P<sup>F</sup>FL<sup>C</sup>L<sup>L</sup>I<sup>C</sup>P<sup>L</sup>G<sup>V</sup>L<sup>A</sup>N<sup>F</sup>V<sup>H</sup>IL<sup>V</sup>L<sup>T</sup>R<sup>R</sup>K<sup>M</sup>R<sup>R</sup>C<sup>A</sup>I<sup>N</sup>N<sup>C</sup>L<sup>I</sup>G<sup>I</sup>A<sup>I</sup>C<sup>D</sup>I<sup>C</sup>T<sup>M</sup>T<sup>S</sup>Y<sup>F</sup>V<sup>Y</sup>I<sup>L</sup>R<sup>F</sup>E<sup>I</sup>W<sup>T</sup>R<sup>I</sup>T<sup>S</sup>

*G. pallida* DMSR-4 -----L<sup>N</sup>N<sup>H</sup>V<sup>H</sup>A<sup>V</sup>Y<sup>L</sup>CL<sup>L</sup>I<sup>C</sup>P<sup>L</sup>G<sup>I</sup>L<sup>A</sup>N<sup>L</sup>V<sup>H</sup>IL<sup>V</sup>L<sup>T</sup>R<sup>R</sup>MR<sup>R</sup>CA<sup>V</sup>I<sup>N</sup>N<sup>C</sup>L<sup>M</sup>G<sup>I</sup>A<sup>I</sup>C<sup>D</sup>I<sup>F</sup>T<sup>M</sup>F<sup>I</sup>Y<sup>L</sup>V<sup>Y</sup>I<sup>L</sup>Y<sup>F</sup>E<sup>I</sup>W<sup>A</sup>K<sup>I</sup>Y<sup>Q</sup>

Consensus

YY VH YLCLLIC LGILAN VHILVLTR RMRRCAVN VL AIAICDV TMTSY VYILRF IY

*A. suum* DMSR-4 ---Y<sup>P</sup>Y<sup>I</sup>W<sup>I</sup>A<sup>V</sup>L<sup>L</sup>S<sup>H</sup>A<sup>V</sup>F<sup>T</sup>I<sup>A</sup>L<sup>H</sup>A<sup>I</sup>T<sup>L</sup>Y<sup>L</sup>S<sup>V</sup>A<sup>L</sup>A<sup>F</sup>I<sup>R</sup>W<sup>Q</sup>A<sup>L</sup>G<sup>N</sup>V<sup>H</sup>S<sup>-</sup>P<sup>W</sup>L<sup>L</sup>S<sup>S</sup>A<sup>W</sup>K<sup>L</sup>F<sup>G</sup>V<sup>C</sup>T<sup>I</sup>V<sup>V</sup>S<sup>I</sup>L<sup>C</sup>I<sup>P</sup>T<sup>M</sup>L<sup>V</sup>H<sup>R</sup>I<sup>V</sup>K<sup>M</sup>P-----L<sup>K</sup>I<sup>L</sup>P<sup>L</sup>V<sup>S</sup>E

*A. caninum* DMSR-4 -----

*N. brasiliensis* DMSR-4 ---Y<sup>S</sup>Y<sup>S</sup>W<sup>M</sup>M<sup>F</sup>L<sup>K</sup>I<sup>H</sup>V<sup>V</sup>V<sup>S</sup>I<sup>A</sup>L<sup>H</sup>A<sup>I</sup>T<sup>L</sup>Y<sup>M</sup>G<sup>A</sup>V<sup>A</sup>F<sup>I</sup>R<sup>W</sup>Q<sup>A</sup>L<sup>G</sup>N<sup>I</sup>H<sup>S</sup>-Q<sup>W</sup>L<sup>Q</sup>R<sup>S</sup>A<sup>W</sup>K<sup>L</sup>F<sup>A</sup>F<sup>V</sup>T<sup>A</sup>T<sup>I</sup>S<sup>V</sup>M<sup>C</sup>V<sup>P</sup>T<sup>V</sup>M<sup>L</sup>H<sup>E</sup>I<sup>F</sup>V<sup>V</sup>S-----D<sup>S</sup>K<sup>E</sup>H<sup>F</sup>S<sup>E</sup>

*H. contortus* DMSR-4 ---Y<sup>S</sup>Y<sup>S</sup>W<sup>M</sup>L<sup>F</sup>L<sup>K</sup>I<sup>H</sup>V<sup>V</sup>V<sup>S</sup>I<sup>A</sup>L<sup>H</sup>A<sup>I</sup>T<sup>L</sup>Y<sup>M</sup>G<sup>A</sup>A<sup>L</sup>A<sup>F</sup>I<sup>R</sup>W<sup>Q</sup>A<sup>L</sup>G<sup>N</sup>I<sup>H</sup>S-R<sup>W</sup>L<sup>Q</sup>R<sup>S</sup>A<sup>W</sup>K<sup>L</sup>F<sup>G</sup>I<sup>V</sup>T<sup>A</sup>S<sup>I</sup>S<sup>M</sup>M<sup>C</sup>V<sup>P</sup>T<sup>V</sup>M<sup>L</sup>H<sup>E</sup>I<sup>Y</sup>E<sup>I</sup>S-----N<sup>F</sup>A<sup>E</sup>Q<sup>A</sup>S<sup>T</sup>

*C. elegans* DMSR-4 ---Y<sup>S</sup>Y<sup>I</sup>W<sup>L</sup>V<sup>L</sup>F<sup>L</sup>K<sup>F</sup>H<sup>V</sup>W<sup>S</sup>S<sup>M</sup>T<sup>L</sup>H<sup>A</sup>I<sup>T</sup>L<sup>Y</sup>M<sup>G</sup>G<sup>A</sup>A<sup>L</sup>A<sup>F</sup>I<sup>R</sup>W<sup>Q</sup>A<sup>L</sup>G<sup>N</sup>I<sup>H</sup>S-K<sup>W</sup>L<sup>Q</sup>R<sup>N</sup>S<sup>W</sup>Q<sup>L</sup>F<sup>G</sup>V<sup>V</sup>S<sup>V</sup>V<sup>L</sup>S<sup>I</sup>V<sup>C</sup>L<sup>P</sup>T<sup>L</sup>V<sup>L</sup>H<sup>K</sup>I<sup>Y</sup>E<sup>I</sup>E<sup>S</sup>P<sup>E</sup>I<sup>E</sup>T<sup>S</sup>T<sup>V</sup>S<sup>E</sup>V<sup>L</sup>R<sup>L</sup>S<sup>G</sup>

*B. xylophilus* DMSR-4 ---F<sup>S</sup>Y<sup>F</sup>W<sup>A</sup>V<sup>L</sup>E<sup>F</sup>H<sup>A</sup>T<sup>L</sup>S<sup>I</sup>C<sup>L</sup>H<sup>T</sup>I<sup>N</sup>L<sup>Y</sup>L<sup>C</sup>V<sup>T</sup>M<sup>A</sup>F<sup>I</sup>R<sup>W</sup>K<sup>A</sup>M<sup>R</sup>T<sup>S</sup>K<sup>S</sup>-A<sup>V</sup>M<sup>K</sup>N<sup>T</sup>A<sup>W</sup>K<sup>I</sup>F<sup>C</sup>V<sup>L</sup>A<sup>L</sup>V<sup>V</sup>S<sup>V</sup>L<sup>C</sup>V<sup>P</sup>T<sup>F</sup>L<sup>V</sup>H<sup>E</sup>A<sup>H</sup>E<sup>V</sup>N<sup>L</sup>T<sup>V</sup>E<sup>N</sup>T<sup>Y</sup>S<sup>F</sup>Y<sup>T</sup>V<sup>D</sup>I<sup>S</sup>E

*M. hapla* DMSR-4 -G<sup>-</sup>I<sup>S</sup>F<sup>W</sup>A<sup>T</sup>Y<sup>L</sup>H<sup>F</sup>H<sup>A</sup>T<sup>S</sup>I<sup>C</sup>L<sup>H</sup>T<sup>I</sup>A<sup>L</sup>Y<sup>M</sup>C<sup>V</sup>T<sup>M</sup>A<sup>L</sup>I<sup>R</sup>W<sup>R</sup>V<sup>M</sup>S<sup>Q</sup>P<sup>F</sup>S<sup>K</sup>V<sup>V</sup>V<sup>Q</sup>P<sup>I</sup>I<sup>S</sup>W<sup>K</sup>I<sup>F</sup>G<sup>L</sup>T<sup>I</sup>V<sup>V</sup>S<sup>A</sup>F<sup>C</sup>I<sup>P</sup>T<sup>Y</sup>L<sup>V</sup>H<sup>D</sup>V<sup>I</sup>S<sup>F</sup>-----G<sup>A</sup>N<sup>F</sup>S<sup>V</sup>D<sup>I</sup>S<sup>E</sup>

*M. incognita* DMSR-4 I<sup>K</sup>T<sup>I</sup>S<sup>Y</sup>F<sup>W</sup>A<sup>T</sup>Y<sup>L</sup>H<sup>F</sup>H<sup>A</sup>T<sup>S</sup>I<sup>C</sup>L<sup>H</sup>T<sup>I</sup>A<sup>L</sup>Y<sup>M</sup>S<sup>V</sup>T<sup>M</sup>A<sup>L</sup>I<sup>R</sup>W<sup>R</sup>V<sup>M</sup>S<sup>Q</sup>P<sup>F</sup>S<sup>K</sup>V<sup>V</sup>V<sup>Q</sup>P<sup>I</sup>L<sup>S</sup>W<sup>K</sup>I<sup>F</sup>G<sup>S</sup>V<sup>T</sup>I<sup>V</sup>V<sup>S</sup>M<sup>L</sup>C<sup>I</sup>P<sup>T</sup>Y<sup>L</sup>V<sup>H</sup>D<sup>V</sup>I<sup>N</sup>F-----G<sup>A</sup>H<sup>F</sup>S<sup>V</sup>D<sup>I</sup>S<sup>E</sup>

*G. pallida* DMSR-4 T<sup>N</sup>-I<sup>S</sup>F<sup>W</sup>A<sup>T</sup>Y<sup>L</sup>H<sup>F</sup>H<sup>A</sup>T<sup>V</sup>S<sup>I</sup>C<sup>L</sup>H<sup>T</sup>I<sup>T</sup>L<sup>Y</sup>T<sup>C</sup>V<sup>T</sup>M<sup>A</sup>L<sup>I</sup>R<sup>W</sup>R<sup>V</sup>M<sup>S</sup>Q<sup>P</sup>S<sup>Y</sup>S-L<sup>I</sup>V<sup>Q</sup>P<sup>A</sup>T<sup>V</sup>W<sup>K</sup>I<sup>F</sup>A<sup>L</sup>V<sup>T</sup>L<sup>V</sup>C<sup>F</sup>F<sup>C</sup>V<sup>P</sup>T<sup>Y</sup>L<sup>V</sup>H<sup>D</sup>V<sup>I</sup>V<sup>K</sup>F<sup>R</sup>Y---A<sup>D</sup>G<sup>T</sup>T<sup>F</sup>T<sup>V</sup>D<sup>I</sup>S<sup>E</sup>

Consensus

YSY W YL FHA SI LH ITLYM V LAFIRW AL N HS LQP SAWKIFGVVTVVVSILCVPT LVHDI...I F VDISE

*A. suum* DMSR-4 P<sup>A</sup>T<sup>L</sup>I<sup>A</sup>K<sup>E</sup>L<sup>Y</sup>T<sup>L</sup>D<sup>M</sup>V<sup>E</sup>D<sup>A</sup>C<sup>S</sup>L<sup>F</sup>Q<sup>F</sup>N<sup>L</sup>W<sup>I</sup>T<sup>A</sup>I<sup>F</sup>L<sup>K</sup>A<sup>V</sup>P<sup>C</sup>V<sup>L</sup>L<sup>L</sup>W<sup>F</sup>T<sup>F</sup>A<sup>L</sup>V<sup>S</sup>K<sup>L</sup>D<sup>T</sup>D<sup>I</sup>K<sup>R</sup>N<sup>D</sup>L<sup>Y</sup>S<sup>K</sup>S-F<sup>R</sup>K<sup>H</sup>M<sup>R</sup>K<sup>T</sup>V<sup>P</sup>D<sup>K</sup>T<sup>T</sup>Y<sup>M</sup>L<sup>V</sup>I<sup>M</sup>I<sup>S</sup>V<sup>F</sup>L<sup>A</sup>T<sup>E</sup>L<sup>P</sup>Q

*A. caninum* DMSR-4 -----W<sup>I</sup>L<sup>H</sup>F<sup>Q</sup>A<sup>I</sup>P<sup>C</sup>G<sup>L</sup>L<sup>L</sup>W<sup>F</sup>T<sup>L</sup>A<sup>L</sup>V<sup>L</sup>K<sup>L</sup>R<sup>K</sup>T<sup>D</sup>E<sup>K</sup>R<sup>N</sup>Y<sup>L</sup>Y<sup>S</sup>K<sup>S</sup>-F<sup>R</sup>K<sup>H</sup>I<sup>K</sup>K<sup>T</sup>T<sup>V</sup>P<sup>D</sup>R<sup>T</sup>T<sup>Y</sup>M<sup>L</sup>I<sup>I</sup>M<sup>I</sup>L<sup>V</sup>V<sup>F</sup>L<sup>V</sup>T<sup>E</sup>L<sup>P</sup>Q

*N. brasiliensis* DMSR-4 P<sup>S</sup>-----Y<sup>T</sup>L<sup>D</sup>F<sup>A</sup>N<sup>Y</sup>S<sup>C</sup>G<sup>F</sup>Y<sup>K</sup>F<sup>N</sup>L<sup>W</sup>M<sup>L</sup>A<sup>V</sup>M<sup>K</sup>A<sup>I</sup>P<sup>C</sup>A<sup>L</sup>L<sup>L</sup>W<sup>F</sup>T<sup>V</sup>A<sup>L</sup>V<sup>M</sup>K<sup>L</sup>R<sup>K</sup>T<sup>D</sup>E<sup>K</sup>R<sup>N</sup>Y<sup>L</sup>Y<sup>S</sup>K<sup>S</sup>-F<sup>R</sup>K<sup>H</sup>I<sup>K</sup>K<sup>T</sup>T<sup>V</sup>P<sup>D</sup>R<sup>T</sup>T<sup>Y</sup>M<sup>L</sup>I<sup>I</sup>M<sup>I</sup>L<sup>V</sup>V<sup>F</sup>L<sup>V</sup>T<sup>E</sup>L<sup>P</sup>Q

*H. contortus* DMSR-4 P<sup>S</sup>-----Y<sup>T</sup>L<sup>D</sup>F<sup>S</sup>N<sup>Y</sup>S<sup>C</sup>G<sup>F</sup>Y<sup>K</sup>F<sup>N</sup>L<sup>W</sup>M<sup>L</sup>A<sup>V</sup>A<sup>M</sup>K<sup>A</sup>I<sup>P</sup>C<sup>A</sup>L<sup>L</sup>W<sup>F</sup>T<sup>V</sup>A<sup>L</sup>V<sup>M</sup>K<sup>L</sup>R<sup>K</sup>T<sup>D</sup>E<sup>K</sup>R<sup>N</sup>Y<sup>L</sup>Y<sup>S</sup>K<sup>S</sup>-F<sup>R</sup>K<sup>H</sup>I<sup>K</sup>K<sup>T</sup>T<sup>V</sup>P<sup>D</sup>R<sup>T</sup>T<sup>Y</sup>M<sup>L</sup>I<sup>I</sup>M<sup>I</sup>L<sup>V</sup>V<sup>F</sup>L<sup>V</sup>T<sup>E</sup>L<sup>P</sup>Q

*C. elegans* DMSR-4 Q<sup>S</sup>I<sup>P</sup>-K<sup>E</sup>V<sup>R</sup>Y<sup>S</sup>L<sup>N</sup>F<sup>S</sup>T<sup>Y</sup>S<sup>C</sup>A<sup>F</sup>F<sup>K</sup>F<sup>N</sup>L<sup>W</sup>M<sup>L</sup>A<sup>I</sup>V<sup>L</sup>K<sup>A</sup>I<sup>P</sup>C<sup>A</sup>L<sup>L</sup>W<sup>F</sup>T<sup>I</sup>A<sup>L</sup>V<sup>V</sup>K<sup>L</sup>R<sup>Q</sup>T<sup>D</sup>E<sup>K</sup>R<sup>N</sup>Y<sup>L</sup>Y<sup>S</sup>K<sup>S</sup>-F<sup>R</sup>K<sup>H</sup>V<sup>K</sup>K<sup>T</sup>T<sup>V</sup>P<sup>D</sup>R<sup>T</sup>T<sup>Y</sup>M<sup>L</sup>I<sup>I</sup>M<sup>I</sup>L<sup>V</sup>V<sup>F</sup>L<sup>V</sup>T<sup>E</sup>L<sup>P</sup>Q

*B. xylophilus* DMSR-4 W<sup>A</sup>R-----M<sup>N</sup>---R<sup>C</sup>R<sup>W</sup>F<sup>K</sup>A<sup>N</sup>L<sup>W</sup>I<sup>G</sup>I<sup>V</sup>L<sup>K</sup>A<sup>I</sup>P<sup>C</sup>F<sup>L</sup>L<sup>L</sup>W<sup>F</sup>T<sup>M</sup>A<sup>L</sup>M<sup>I</sup>R<sup>L</sup>H<sup>K</sup>N<sup>N</sup>A<sup>K</sup>R<sup>A</sup>M<sup>L</sup>Y<sup>T</sup>N<sup>S</sup>V<sup>K</sup>G<sup>A</sup>R<sup>K</sup>F<sup>R</sup>Q<sup>N</sup>Y<sup>D</sup>R<sup>T</sup>T<sup>F</sup>T<sup>L</sup>I<sup>V</sup>M<sup>I</sup>T<sup>A</sup>F<sup>L</sup>V<sup>T</sup>E<sup>L</sup>P<sup>Q</sup>

*M. hapla* DMSR-4 L<sup>A</sup>R-----S<sup>N</sup>---N<sup>C</sup>R<sup>Y</sup>F<sup>K</sup>L<sup>N</sup>L<sup>F</sup>I<sup>G</sup>I<sup>V</sup>L<sup>K</sup>A<sup>I</sup>P<sup>C</sup>F<sup>L</sup>L<sup>L</sup>W<sup>F</sup>T<sup>L</sup>A<sup>L</sup>M<sup>R</sup>R<sup>L</sup>R<sup>E</sup>N<sup>N</sup>A<sup>K</sup>R<sup>A</sup>L<sup>L</sup>K<sup>G</sup>H---N<sup>K</sup>K<sup>L</sup>L<sup>N</sup>Y<sup>D</sup>R<sup>T</sup>T<sup>F</sup>T<sup>L</sup>I<sup>V</sup>L<sup>G</sup>V<sup>F</sup>L<sup>V</sup>T<sup>E</sup>L<sup>P</sup>Q

*M. incognita* DMSR-4 W<sup>A</sup>R-----S<sup>N</sup>---N<sup>C</sup>R<sup>Y</sup>F<sup>K</sup>L<sup>N</sup>L<sup>F</sup>I<sup>G</sup>I<sup>V</sup>L<sup>K</sup>A<sup>I</sup>P<sup>C</sup>F<sup>L</sup>L<sup>L</sup>W<sup>F</sup>T<sup>L</sup>A<sup>L</sup>M<sup>R</sup>R<sup>L</sup>R<sup>E</sup>N<sup>N</sup>A<sup>K</sup>R<sup>A</sup>Q<sup>L</sup>L<sup>K</sup>D<sup>Q</sup>---N<sup>K</sup>K<sup>L</sup>L<sup>N</sup>Y<sup>D</sup>R<sup>T</sup>T<sup>F</sup>T<sup>L</sup>I<sup>V</sup>L<sup>G</sup>V<sup>F</sup>L<sup>L</sup>T<sup>E</sup>L<sup>P</sup>Q

*G. pallida* DMSR-4 W<sup>A</sup>R-----T<sup>D</sup>---H<sup>C</sup>H<sup>Y</sup>L<sup>K</sup>A<sup>N</sup>L<sup>F</sup>I<sup>G</sup>I<sup>V</sup>L<sup>K</sup>A<sup>I</sup>P<sup>C</sup>F<sup>L</sup>L<sup>L</sup>W<sup>F</sup>T<sup>M</sup>A<sup>L</sup>M<sup>I</sup>R<sup>L</sup>R<sup>E</sup>N<sup>N</sup>A<sup>K</sup>R<sup>A</sup>L<sup>L</sup>R<sup>D</sup>K---C<sup>K</sup>K<sup>L</sup>Q<sup>N</sup>Y<sup>D</sup>R<sup>T</sup>T<sup>F</sup>T<sup>L</sup>I<sup>V</sup>M<sup>I</sup>L<sup>G</sup>V<sup>F</sup>L<sup>L</sup>T<sup>E</sup>L<sup>P</sup>Q

Consensus

A C FFK NLWIIAIVLKAIPC LLLWFTLALVIKLR TD KRN LYSKS FRKHIKKT VPDRTTYMLIIML VFLVTELPQ

*A. suum* DMSR-4 F<sup>L</sup>A<sup>L</sup>L<sup>N</sup>G<sup>V</sup>Y<sup>T</sup>A<sup>D</sup>V<sup>H</sup>R<sup>F</sup>I<sup>Y</sup>V<sup>N</sup>V<sup>G</sup>D<sup>V</sup>L<sup>D</sup>L<sup>M</sup>S<sup>L</sup>I<sup>N</sup>C<sup>S</sup>V<sup>D</sup>C<sup>V</sup>L<sup>Y</sup>C<sup>M</sup>S<sup>S</sup>R<sup>Y</sup>R<sup>H</sup>T<sup>F</sup>N<sup>H</sup>L<sup>L</sup>I<sup>R</sup>A<sup>E</sup>S<sup>W</sup>L<sup>R</sup>N<sup>K</sup>R<sup>E</sup>R<sup>O</sup>Y<sup>E</sup>K<sup>H</sup>W<sup>R</sup>T<sup>S</sup>T<sup>D</sup>N<sup>N</sup>P<sup>A</sup>K<sup>L</sup>G<sup>I</sup>-----

*A. caninum* DMSR-4 F<sup>L</sup>A<sup>L</sup>L<sup>N</sup>G<sup>V</sup>Y<sup>T</sup>D<sup>V</sup>N<sup>N</sup>Y<sup>I</sup>Y<sup>Q</sup>H<sup>V</sup>G<sup>E</sup>L<sup>F</sup>D<sup>L</sup>L<sup>S</sup>L<sup>V</sup>N<sup>C</sup>R-----

*N. brasiliensis* DMSR-4 FLALLNGVYITDVNNYIYQHVGELFDLLSLVNCVDFVLYCFMSSRYRQTFGHILIRVESWLRNQSSGWKYSKDLTKVAPPTV-----  
*H. contortus* DMSR-4 FLALLNGVYITDVNNYIYQHVGELFDLLSLVNCVDFVLYCFMSSRYRQTFGHILIRVESWLRNQSSGCKYSKEFSKTPPPTI-----  
*C. elegans* DMSR-4 FLALLNGLYTGDVNIYIYKNISELLDFLLSLINCVDVFLYCFMSSRYRQTFGHMLIRVESWLRNHNHGERRLAREIKKKLPAPVGV-----  
*B. xylophilus* DMSR-4 MLTMLNGVYINDVHTVIYMNLANVLDVLSLINCYVGFAYCFMSSRYRQTFMMML-----  
*M. hapla* DMSR-4 VLTLLNGVFINDVHTVFYMNLANLLDLSLINCYVGFAYCFMCTKYQOTFIMMIIITWLE-----  
*M. incognita* DMSR-4 VLTLLNGVFINDVHTVFYMNLANLLDLSLINCYVGFAYCFMCTKYQOTFVLMIFNCISLTFKCFGVKRNTVITNQERRKRASRKQSAHKRSLVRSSYN  
*G. pallida* DMSR-4 ILLTLLNGLYINDVHSVYMNLANLLDLSLINCYVGFAYCFMCTKYRQTFGLMILTSLDSYRKLVCHEKYGQQGQKHRRSHRHHRRNSQNE--LLRRPEN

Consensus FLALLNGVYIT DVH YIYMNLAELLDLLSLINC V FV YCFM SKYRQTF MII S LR K

*A. suum* DMSR-4 -----  
*A. caninum* DMSR-4 -----  
*N. brasiliensis* DMSR-4 -----  
*H. contortus* DMSR-4 -----  
*C. elegans* DMSR-4 -----  
*B. xylophilus* DMSR-4 -----  
*M. hapla* DMSR-4 -----  
*M. incognita* DMSR-4 YSKTDCEMPQRH  
*G. pallida* DMSR-4 -----

Consensus

## 17. DMSR-5 homologues

*A. suum* DMSR-5 DDFKNCILMMSWCDDEAYLFDLNDN-TTQLFLYRLHFLSSVYTFHRYFCALICFCGVTNVLVHIAVLRKQMRCAFVNSILS<sup>1</sup>MAICDVIIMS<sup>2</sup>FVYI<sup>3</sup>  
*N. brasiliensis* DMSR-5 -----CQNPPLPFDLKD<sup>1</sup>NATAE<sup>2</sup>FFGLIE<sup>3</sup>FSRVY<sup>4</sup>THV<sup>5</sup>RYLCLV<sup>6</sup>CVL<sup>7</sup>VGIV<sup>8</sup>LNT<sup>9</sup>LH<sup>10</sup>FFVLSRR<sup>11</sup>PM<sup>12</sup>RY<sup>13</sup>I<sup>14</sup>INALLCAM<sup>15</sup>AI<sup>16</sup>CDAL<sup>17</sup>TMS<sup>18</sup>YLI<sup>19</sup>YI<sup>20</sup>  
*H. contortus* DMSR-5 -----CQNDPPLFDLED<sup>1</sup>NATIQ<sup>2</sup>FFHELQ<sup>3</sup>AFSR<sup>4</sup>RY<sup>5</sup>Y<sup>6</sup>GFH<sup>7</sup>RFIC<sup>8</sup>LV<sup>9</sup>CVL<sup>10</sup>IG<sup>11</sup>SLN<sup>12</sup>ILH<sup>13</sup>FFVLSRR<sup>14</sup>PM<sup>15</sup>RY<sup>16</sup>I<sup>17</sup>INALLCAM<sup>18</sup>AV<sup>19</sup>CDAL<sup>20</sup>TMS<sup>21</sup>YLI<sup>22</sup>YI<sup>23</sup>  
*C. elegans* DMSR-5 -----MCTQDPLPFDLE<sup>1</sup>NSNTI<sup>2</sup>YFF<sup>3</sup>QLIA<sup>4</sup>NQV<sup>5</sup>Y<sup>6</sup>TVL<sup>7</sup>HR<sup>8</sup>YLC<sup>9</sup>LV<sup>10</sup>CF<sup>11</sup>FGV<sup>12</sup>LLNS<sup>13</sup>LH<sup>14</sup>FFVLSRR<sup>15</sup>KAM<sup>16</sup>RV<sup>17</sup>I<sup>18</sup>INALLCAM<sup>19</sup>SI<sup>20</sup>CDI<sup>21</sup>TMT<sup>22</sup>SY<sup>23</sup>FI<sup>24</sup>YI<sup>25</sup>  
*G. pallida* DMSR-5 -----MRLMTCDEELS<sup>1</sup>LFDINS<sup>2</sup>NTT<sup>3</sup>AV<sup>4</sup>FL<sup>5</sup>EAL<sup>6</sup>WG<sup>7</sup>IST<sup>8</sup>LY<sup>9</sup>NQ<sup>10</sup>V<sup>11</sup>HC<sup>12</sup>WL<sup>13</sup>GL<sup>14</sup>FC<sup>15</sup>V<sup>16</sup>FG<sup>17</sup>SLAN<sup>18</sup>CV<sup>19</sup>H<sup>20</sup>IF<sup>21</sup>VLSRR<sup>22</sup>PAM<sup>23</sup>QK<sup>24</sup>AV<sup>25</sup>NRL<sup>26</sup>LLA<sup>27</sup>IAL<sup>28</sup>CDI<sup>29</sup>AT<sup>30</sup>MAS<sup>31</sup>Y<sup>32</sup>TV<sup>33</sup>FV<sup>34</sup>  
*M. hapla* DMSR-5 -----MKLMTCDEELS<sup>1</sup>LFDLNS<sup>2</sup>NTT<sup>3</sup>IA<sup>4</sup>FL<sup>5</sup>ETL<sup>6</sup>WN<sup>7</sup>IS<sup>8</sup>SL<sup>9</sup>YN<sup>10</sup>QL<sup>11</sup>HC<sup>12</sup>Y<sup>13</sup>VL<sup>14</sup>GL<sup>15</sup>FC<sup>16</sup>V<sup>17</sup>FG<sup>18</sup>SLAN<sup>19</sup>VV<sup>20</sup>H<sup>21</sup>IF<sup>22</sup>VLSRR<sup>23</sup>PAM<sup>24</sup>QK<sup>25</sup>AV<sup>26</sup>NRL<sup>27</sup>LLA<sup>28</sup>IAL<sup>29</sup>CDI<sup>30</sup>CT<sup>31</sup>MF<sup>32</sup>SY<sup>33</sup>TV<sup>34</sup>FI<sup>35</sup>  
*M. incognita* DMSR-5 -----MKLMTCDEELS<sup>1</sup>LFDLNS<sup>2</sup>NTT<sup>3</sup>IA<sup>4</sup>FL<sup>5</sup>ETL<sup>6</sup>WN<sup>7</sup>IS<sup>8</sup>SL<sup>9</sup>YN<sup>10</sup>QL<sup>11</sup>HC<sup>12</sup>Y<sup>13</sup>VL<sup>14</sup>GL<sup>15</sup>FC<sup>16</sup>V<sup>17</sup>FG<sup>18</sup>SLAN<sup>19</sup>VV<sup>20</sup>H<sup>21</sup>IF<sup>22</sup>VLSRR<sup>23</sup>PAM<sup>24</sup>QK<sup>25</sup>AV<sup>26</sup>NRL<sup>27</sup>LLA<sup>28</sup>IAL<sup>29</sup>CDI<sup>30</sup>CT<sup>31</sup>MF<sup>32</sup>SY<sup>33</sup>TV<sup>34</sup>FI<sup>35</sup>

Consensus M L ICDEDL LFDL NTTI FLE L FS LYT IHRYLCLFICVFGILLNVVHIFVLSRKAMR YAVNALL IMAICDIITM SY VYI

*A. suum* DMSR-5 RFRVIENED-DT<sup>1</sup>LG<sup>2</sup>Y<sup>3</sup>Y<sup>4</sup>GW<sup>5</sup>LV<sup>6</sup>FL<sup>7</sup>LI<sup>8</sup>HV<sup>9</sup>VLSIAL<sup>10</sup>LHT<sup>11</sup>IG<sup>12</sup>LY<sup>13</sup>SV<sup>14</sup>FMAY<sup>15</sup>VR<sup>16</sup>VAL<sup>17</sup>DRL<sup>18</sup>DSK<sup>19</sup>W<sup>20</sup>IR<sup>21</sup>TR<sup>22</sup>PV<sup>23</sup>GR<sup>24</sup>IF<sup>25</sup>FAL<sup>26</sup>AIT<sup>27</sup>IFALS<sup>28</sup>IPT<sup>29</sup>LIV<sup>30</sup>HE<sup>31</sup>IV<sup>32</sup>PFKH<sup>33</sup>FTTV<sup>34</sup>NE<sup>35</sup>  
*N. brasiliensis* DMSR-5 RFRIFDNDV-GI<sup>1</sup>IG<sup>2</sup>YS<sup>3</sup>PWL<sup>4</sup>VFL<sup>5</sup>IA<sup>6</sup>HV<sup>7</sup>TSSIAL<sup>8</sup>LHT<sup>9</sup>CS<sup>10</sup>LY<sup>11</sup>LS<sup>12</sup>VT<sup>13</sup>MAY<sup>14</sup>IR<sup>15</sup>W<sup>16</sup>TAL<sup>17</sup>DRL<sup>18</sup>DA<sup>19</sup>WINNSA<sup>20</sup>LK<sup>21</sup>Q<sup>22</sup>IF<sup>23</sup>FLT<sup>24</sup>AF<sup>25</sup>SV<sup>26</sup>TF<sup>27</sup>SI<sup>28</sup>PT<sup>29</sup>LM<sup>30</sup>VH<sup>31</sup>K<sup>32</sup>IV<sup>33</sup>SV<sup>34</sup>NDIL<sup>35</sup>GT<sup>36</sup>ND<sup>37</sup>  
*H. contortus* DMSR-5 RFRIFDNN--GVI<sup>1</sup>IG<sup>2</sup>YS<sup>3</sup>PWL<sup>4</sup>VFL<sup>5</sup>II<sup>6</sup>HV<sup>7</sup>TSSIAL<sup>8</sup>LHT<sup>9</sup>CS<sup>10</sup>LY<sup>11</sup>LS<sup>12</sup>VT<sup>13</sup>MAY<sup>14</sup>IR<sup>15</sup>W<sup>16</sup>TAL<sup>17</sup>DRL<sup>18</sup>DA<sup>19</sup>WINNSA<sup>20</sup>VR<sup>21</sup>H<sup>22</sup>IF<sup>23</sup>FFT<sup>24</sup>A<sup>25</sup>SV<sup>26</sup>AF<sup>27</sup>SI<sup>28</sup>PT<sup>29</sup>LM<sup>30</sup>VH<sup>31</sup>K<sup>32</sup>IV<sup>33</sup>VP<sup>34</sup>SEV<sup>35</sup>LET<sup>36</sup>ND<sup>37</sup>  
*C. elegans* DMSR-5 RFRIFDTPS-TI<sup>1</sup>IG<sup>2</sup>YS<sup>3</sup>PWL<sup>4</sup>VFL<sup>5</sup>IT<sup>6</sup>HV<sup>7</sup>TSSIAL<sup>8</sup>LHT<sup>9</sup>TS<sup>10</sup>LY<sup>11</sup>LS<sup>12</sup>VI<sup>13</sup>MAY<sup>14</sup>IR<sup>15</sup>W<sup>16</sup>TAL<sup>17</sup>DRL<sup>18</sup>DA<sup>19</sup>WINHGA<sup>20</sup>LK<sup>21</sup>Q<sup>22</sup>IL<sup>23</sup>LFT<sup>24</sup>AL<sup>25</sup>IV<sup>26</sup>SV<sup>27</sup>SI<sup>28</sup>PT<sup>29</sup>VM<sup>30</sup>VH<sup>31</sup>K<sup>32</sup>IV<sup>33</sup>PV<sup>34</sup>TEV<sup>35</sup>LG<sup>36</sup>M<sup>37</sup>NE<sup>38</sup>  
*G. pallida* DMSR-5 RFEFAVDKDEPPI<sup>1</sup>GY<sup>2</sup>DF<sup>3</sup>FW<sup>4</sup>IT<sup>5</sup>FL<sup>6</sup>LA<sup>7</sup>HV<sup>8</sup>VCSIAL<sup>9</sup>LHT<sup>10</sup>IT<sup>11</sup>LY<sup>12</sup>LV<sup>13</sup>VT<sup>14</sup>AF<sup>15</sup>IR<sup>16</sup>Y<sup>17</sup>K<sup>18</sup>TK<sup>19</sup>VG<sup>20</sup>SL<sup>21</sup>NH<sup>22</sup>ENI<sup>23</sup>AC<sup>24</sup>PL<sup>25</sup>IT<sup>26</sup>VA<sup>27</sup>VL<sup>28</sup>TV<sup>29</sup>FI<sup>30</sup>CI<sup>31</sup>PT<sup>32</sup>FL<sup>33</sup>I<sup>34</sup>HS<sup>35</sup>II<sup>36</sup>IP<sup>37</sup>VT<sup>38</sup>ST<sup>39</sup>DP<sup>40</sup>IT<sup>41</sup>Q<sup>42</sup>  
*M. hapla* DMSR-5 RFGFAVDPEPPE<sup>1</sup>GY<sup>2</sup>NE<sup>3</sup>I<sup>4</sup>W<sup>5</sup>IT<sup>6</sup>FL<sup>7</sup>LA<sup>8</sup>HV<sup>9</sup>VCSIAL<sup>10</sup>LHT<sup>11</sup>IT<sup>12</sup>LY<sup>13</sup>LS<sup>14</sup>VATA<sup>15</sup>AF<sup>16</sup>IR<sup>17</sup>Y<sup>18</sup>K<sup>19</sup>TK<sup>20</sup>Q<sup>21</sup>IG<sup>22</sup>SL<sup>23</sup>NH<sup>24</sup>ENI<sup>25</sup>AL<sup>26</sup>PV<sup>27</sup>FL<sup>28</sup>LV<sup>29</sup>AA<sup>30</sup>FT<sup>31</sup>VI<sup>32</sup>CI<sup>33</sup>PT<sup>34</sup>FL<sup>35</sup>I<sup>36</sup>HS<sup>37</sup>II<sup>38</sup>IP<sup>39</sup>VVA<sup>40</sup>QNA<sup>41</sup>K<sup>42</sup>T<sup>43</sup>G<sup>44</sup>  
*M. incognita* DMSR-5 RFGFAVNPPEPPE<sup>1</sup>GY<sup>2</sup>NE<sup>3</sup>I<sup>4</sup>W<sup>5</sup>IT<sup>6</sup>FL<sup>7</sup>LA<sup>8</sup>HV<sup>9</sup>VCSIAL<sup>10</sup>LHT<sup>11</sup>IT<sup>12</sup>LY<sup>13</sup>LS<sup>14</sup>VATA<sup>15</sup>AF<sup>16</sup>IR<sup>17</sup>Y<sup>18</sup>K<sup>19</sup>TK<sup>20</sup>Q<sup>21</sup>IG<sup>22</sup>SL<sup>23</sup>NH<sup>24</sup>ENI<sup>25</sup>AL<sup>26</sup>PV<sup>27</sup>FL<sup>28</sup>LV<sup>29</sup>AA<sup>30</sup>FT<sup>31</sup>II<sup>32</sup>CI<sup>33</sup>PT<sup>34</sup>-----

Consensus RFR<sup>1</sup>I<sup>2</sup>\_DN<sup>3</sup> D IG<sup>4</sup>YS<sup>5</sup> WLIF<sup>6</sup>LLAH<sup>7</sup>VV SIAL<sup>8</sup>LHT<sup>9</sup>IS<sup>10</sup>LY<sup>11</sup>LS<sup>12</sup>V MAY<sup>13</sup>IR<sup>14</sup>W ALDRL<sup>15</sup>DSK<sup>16</sup>W V IFL<sup>17</sup>VA<sup>18</sup> V LSIPT<sup>19</sup>LLVH<sup>20</sup> IVPV<sup>21</sup>..... ND

*A. suum* DMSR-5 NYTINLIDNITYYTVGLIPQATD<sup>1</sup>NS<sup>2</sup>CR<sup>3</sup>LF<sup>4</sup>KANL<sup>5</sup>WL<sup>6</sup>TG<sup>7</sup>IF<sup>8</sup>FK-VIP<sup>9</sup>CV<sup>10</sup>LL<sup>11</sup>FW<sup>12</sup>FT<sup>13</sup>VAL<sup>14</sup>MR<sup>15</sup>KL<sup>16</sup>NET<sup>17</sup>SR<sup>18</sup>KR<sup>19</sup>IF<sup>20</sup>IL<sup>21</sup>GE-----  
*N. brasiliensis* DMSR-5 TCSNNLYT-----VTLDES<sup>1</sup>DFT<sup>2</sup>GT<sup>3</sup>LF<sup>4</sup>FRANL<sup>5</sup>WL<sup>6</sup>TG<sup>7</sup>IF<sup>8</sup>FK-AV<sup>9</sup>PC<sup>10</sup>V<sup>11</sup>LL<sup>12</sup>W<sup>13</sup>FT<sup>14</sup>IAL<sup>15</sup>I<sup>16</sup>W<sup>17</sup>KL<sup>18</sup>CE<sup>19</sup>MS<sup>20</sup>E<sup>21</sup>K<sup>22</sup>R<sup>23</sup>Q<sup>24</sup>LR<sup>25</sup>GS-----  
*H. contortus* DMSR-5 TOYDNL<sup>1</sup>YT-----VQLDE<sup>2</sup>ID<sup>3</sup>FNG<sup>4</sup>CT<sup>5</sup>LF<sup>6</sup>FRANL<sup>7</sup>WL<sup>8</sup>TG<sup>9</sup>IF<sup>10</sup>FK-AL<sup>11</sup>PC<sup>12</sup>ALL<sup>13</sup>W<sup>14</sup>FT<sup>15</sup>IAL<sup>16</sup>I<sup>17</sup>W<sup>18</sup>KL<sup>19</sup>CE<sup>20</sup>MS<sup>21</sup>E<sup>22</sup>K<sup>23</sup>R<sup>24</sup>Q<sup>25</sup>LR<sup>26</sup>GN-----  
*C. elegans* DMSR-5 TDLLEGAKFDGLYT-VQLDET<sup>1</sup>KING<sup>2</sup>CAL<sup>3</sup>FR<sup>4</sup>VNL<sup>5</sup>WL<sup>6</sup>TG<sup>7</sup>IM<sup>8</sup>FK-AL<sup>9</sup>PC<sup>10</sup>L<sup>11</sup>L<sup>12</sup>W<sup>13</sup>FT<sup>14</sup>IAL<sup>15</sup>I<sup>16</sup>Y<sup>17</sup>KL<sup>18</sup>V<sup>19</sup>Q<sup>20</sup>MS<sup>21</sup>E<sup>22</sup>K<sup>23</sup>R<sup>24</sup>IL<sup>25</sup>RG<sup>26</sup>E<sup>27</sup>K<sup>28</sup>REN<sup>29</sup>VE<sup>30</sup>FQ<sup>31</sup>LL<sup>32</sup>ATS<sup>33</sup>AT<sup>34</sup>P<sup>35</sup>T<sup>36</sup>T<sup>37</sup>TR<sup>38</sup>NE<sup>39</sup>AS<sup>40</sup>PR<sup>41</sup>  
*G. pallida* DMSR-5 HNTILFTV-----GLAE<sup>1</sup>FQ<sup>2</sup>FD<sup>3</sup>TL<sup>4</sup>FF<sup>5</sup>KL<sup>6</sup>NL<sup>7</sup>WL<sup>8</sup>TG<sup>9</sup>IF<sup>10</sup>FK-VIP<sup>11</sup>CV<sup>12</sup>LL<sup>13</sup>LL<sup>14</sup>FT<sup>15</sup>LAL<sup>16</sup>LY<sup>17</sup>E<sup>18</sup>L<sup>19</sup>KN<sup>20</sup>RR<sup>21</sup>K<sup>22</sup>RL<sup>23</sup>MC<sup>24</sup>SG<sup>25</sup>TT-----  
*M. hapla* DMSR-5 ENTTL<sup>1</sup>Y<sup>2</sup>TV-----GLAE<sup>3</sup>FK<sup>4</sup>R<sup>5</sup>LD<sup>6</sup>T<sup>7</sup>CF<sup>8</sup>FF<sup>9</sup>KL<sup>10</sup>NL<sup>11</sup>WM<sup>12</sup>TG<sup>13</sup>IF<sup>14</sup>FK-VIP<sup>15</sup>CV<sup>16</sup>LL<sup>17</sup>LL<sup>18</sup>FT<sup>19</sup>LAL<sup>20</sup>LY<sup>21</sup>E<sup>22</sup>L<sup>23</sup>KN<sup>24</sup>RR<sup>25</sup>K<sup>26</sup>RL<sup>27</sup>GM<sup>28</sup>CS<sup>29</sup>GAT-----  
*M. incognita* DMSR-5 -----LAE<sup>1</sup>FK<sup>2</sup>R<sup>3</sup>LD<sup>4</sup>T<sup>5</sup>CF<sup>6</sup>FF<sup>7</sup>KL<sup>8</sup>NL<sup>9</sup>WM<sup>10</sup>TG<sup>11</sup>IF<sup>12</sup>FK-VIP<sup>13</sup>CV<sup>14</sup>LL<sup>15</sup>LL<sup>16</sup>FT<sup>17</sup>LAL<sup>18</sup>LY<sup>19</sup>E<sup>20</sup>L<sup>21</sup>KN<sup>22</sup>RR<sup>23</sup>K<sup>24</sup>RL<sup>25</sup>GM<sup>26</sup>CS<sup>27</sup>GAT-----

Consensus N LLD TC LFKLNLWLTG<sup>1</sup>IF<sup>2</sup>FK VIP<sup>3</sup>CV<sup>4</sup>LL<sup>5</sup>W<sup>6</sup>FT<sup>7</sup>IAL<sup>8</sup>IY<sup>9</sup>KL SR<sup>10</sup>K<sup>11</sup>R<sup>12</sup> L GD

*A. suum* DMSR-5 -----K<sup>1</sup>K<sup>2</sup>K<sup>3</sup>M<sup>4</sup>AM<sup>5</sup>DK<sup>6</sup>T<sup>7</sup>IL<sup>8</sup>ML<sup>9</sup>II<sup>10</sup>ML<sup>11</sup>F<sup>12</sup>VEL<sup>13</sup>CTE<sup>14</sup>LP<sup>15</sup>Q<sup>16</sup>GAL<sup>17</sup>AIL<sup>18</sup>NAM<sup>19</sup>Y<sup>20</sup>TS<sup>21</sup>DI<sup>22</sup>HAY<sup>23</sup>I<sup>24</sup>Y<sup>25</sup>M<sup>26</sup>NL<sup>27</sup>GEL<sup>28</sup>LD<sup>29</sup>LL<sup>30</sup>SL<sup>31</sup>INC<sup>32</sup>N<sup>33</sup>V<sup>34</sup>GF<sup>35</sup>V<sup>36</sup>LY<sup>37</sup>CC<sup>38</sup>MS<sup>39</sup>SR<sup>40</sup>Y<sup>41</sup>RS<sup>42</sup>TF<sup>43</sup>R<sup>44</sup>H<sup>45</sup>T<sup>46</sup>FW<sup>47</sup>LP--ASAAA  
*N. brasiliensis* DMSR-5 -----NN<sup>1</sup>CK<sup>2</sup>TK<sup>3</sup>LS<sup>4</sup>MD<sup>5</sup>K<sup>6</sup>T<sup>7</sup>IL<sup>8</sup>ML<sup>9</sup>II<sup>10</sup>ML<sup>11</sup>V<sup>12</sup>FL<sup>13</sup>CTE<sup>14</sup>LP<sup>15</sup>Q<sup>16</sup>GL<sup>17</sup>AIL<sup>18</sup>SAL<sup>19</sup>Y<sup>20</sup>PH<sup>21</sup>V<sup>22</sup>HT<sup>23</sup>MY<sup>24</sup>VL<sup>25</sup>N<sup>26</sup>GEM<sup>27</sup>LD<sup>28</sup>LL<sup>29</sup>SL<sup>30</sup>V<sup>31</sup>NCL<sup>32</sup>TS<sup>33</sup>F<sup>34</sup>V<sup>35</sup>LY<sup>36</sup>CC<sup>37</sup>MS<sup>38</sup>ST<sup>39</sup>Y<sup>40</sup>RAT<sup>41</sup>VY<sup>42</sup>HLL<sup>43</sup>MP<sup>44</sup>N<sup>45</sup>K<sup>46</sup>TPA<sup>47</sup>K  
*H. contortus* DMSR-5 ---FR<sup>1</sup>CK<sup>2</sup>TK<sup>3</sup>LS<sup>4</sup>MD<sup>5</sup>K<sup>6</sup>T<sup>7</sup>IL<sup>8</sup>ML<sup>9</sup>II<sup>10</sup>ML<sup>11</sup>V<sup>12</sup>FL<sup>13</sup>CTE<sup>14</sup>LP<sup>15</sup>Q<sup>16</sup>GL<sup>17</sup>AIL<sup>18</sup>SAM<sup>19</sup>Y<sup>20</sup>PS<sup>21</sup>H<sup>22</sup>HT<sup>23</sup>MY<sup>24</sup>V<sup>25</sup>N<sup>26</sup>GEM<sup>27</sup>LD<sup>28</sup>LL<sup>29</sup>SL<sup>30</sup>V<sup>31</sup>NCL<sup>32</sup>TS<sup>33</sup>F<sup>34</sup>V<sup>35</sup>LY<sup>36</sup>CC<sup>37</sup>MS<sup>38</sup>ST<sup>39</sup>Y<sup>40</sup>RS<sup>41</sup>TV<sup>42</sup>RAL<sup>43</sup>IM<sup>44</sup>PS<sup>45</sup>R<sup>46</sup>TPA<sup>47</sup>K  
*C. elegans* DMSR-5 LRK<sup>1</sup>V<sup>2</sup>S<sup>3</sup>Q<sup>4</sup>CSR<sup>5</sup>N<sup>6</sup>VS<sup>7</sup>ID<sup>8</sup>R<sup>9</sup>T<sup>10</sup>IL<sup>11</sup>ML<sup>12</sup>II<sup>13</sup>ML<sup>14</sup>V<sup>15</sup>FL<sup>16</sup>CTE<sup>17</sup>MP<sup>18</sup>Q<sup>19</sup>GL<sup>20</sup>LS<sup>21</sup>LSA<sup>22</sup>I<sup>23</sup>Y<sup>24</sup>PH<sup>25</sup>V<sup>26</sup>HT<sup>27</sup>MY<sup>28</sup>V<sup>29</sup>N<sup>30</sup>GE<sup>31</sup>V<sup>32</sup>LD<sup>33</sup>ML<sup>34</sup>SL<sup>35</sup>INC<sup>36</sup>LS<sup>37</sup>F<sup>38</sup>IV<sup>39</sup>Y<sup>40</sup>CV<sup>41</sup>MS<sup>42</sup>T<sup>43</sup>Y<sup>44</sup>RAT<sup>45</sup>V<sup>46</sup>K<sup>47</sup>SV<sup>48</sup>LC<sup>49</sup>R<sup>50</sup>ST<sup>51</sup>SR<sup>52</sup>RT<sup>53</sup>V<sup>54</sup>F  
*G. pallida* DMSR-5 ---L<sup>1</sup>AY<sup>2</sup>RR<sup>3</sup>HS<sup>4</sup>AQ<sup>5</sup>SD<sup>6</sup>RT<sup>7</sup>TK<sup>8</sup>IL<sup>9</sup>LL<sup>10</sup>LL<sup>11</sup>VE<sup>12</sup>F<sup>13</sup>ST<sup>14</sup>EP<sup>15</sup>Q<sup>16</sup>GL<sup>17</sup>AIL<sup>18</sup>IN<sup>19</sup>GL<sup>20</sup>FP<sup>21</sup>ND<sup>22</sup>I<sup>23</sup>H<sup>24</sup>Q<sup>25</sup>F<sup>26</sup>V<sup>27</sup>Y<sup>28</sup>LS<sup>29</sup>GEL<sup>30</sup>LD<sup>31</sup>LL<sup>32</sup>SL<sup>33</sup>INC<sup>34</sup>NT<sup>35</sup>CF<sup>36</sup>IV<sup>37</sup>MY<sup>38</sup>C<sup>39</sup>NS<sup>40</sup>SS<sup>41</sup>FL<sup>42</sup>Y<sup>43</sup>FK-----  
*M. hapla* DMSR-5 ---L<sup>1</sup>AY<sup>2</sup>RR<sup>3</sup>HS<sup>4</sup>AQ<sup>5</sup>SD<sup>6</sup>RT<sup>7</sup>TK<sup>8</sup>IL<sup>9</sup>LL<sup>10</sup>LL<sup>11</sup>VE<sup>12</sup>F<sup>13</sup>ST<sup>14</sup>EP<sup>15</sup>Q<sup>16</sup>GL<sup>17</sup>AIL<sup>18</sup>IN<sup>19</sup>GL<sup>20</sup>FP<sup>21</sup>ND<sup>22</sup>I<sup>23</sup>H<sup>24</sup>Q<sup>25</sup>F<sup>26</sup>V<sup>27</sup>Y<sup>28</sup>LS<sup>29</sup>GEL<sup>30</sup>LD<sup>31</sup>LL<sup>32</sup>SL<sup>33</sup>INC<sup>34</sup>NT<sup>35</sup>CF<sup>36</sup>IV-----  
*M. incognita* DMSR-5 ---L<sup>1</sup>AY<sup>2</sup>RR<sup>3</sup>HS<sup>4</sup>AQ<sup>5</sup>SD<sup>6</sup>RT<sup>7</sup>TK<sup>8</sup>IL<sup>9</sup>LL<sup>10</sup>LL<sup>11</sup>VE<sup>12</sup>F<sup>13</sup>ST<sup>14</sup>EP<sup>15</sup>Q<sup>16</sup>GL<sup>17</sup>AIL<sup>18</sup>IN<sup>19</sup>GL<sup>20</sup>FP<sup>21</sup>ND<sup>22</sup>I<sup>23</sup>H<sup>24</sup>Q<sup>25</sup>F<sup>26</sup>V<sup>27</sup>Y<sup>28</sup>LS<sup>29</sup>GEL<sup>30</sup>LD<sup>31</sup>LL<sup>32</sup>SL<sup>33</sup>INC<sup>34</sup>NT<sup>35</sup>CF<sup>36</sup>IV-----

Consensus

LA KR LSIDRTTLMLIIMLVVFLCTELPQGILAILNALYPSDIH FVYLNLGELLDLLSLINCNT FIVYCCMSSTYRAT K

|                        |        |                 |
|------------------------|--------|-----------------|
| <i>A. suum</i>         | DMSR-5 | SAISANFRKFSFSV- |
| <i>N. brasiliensis</i> | DMSR-5 | TTLAAQSLKLLIS-- |
| <i>H. contortus</i>    | DMSR-5 | NALAAQSLKLLMS-- |
| <i>C. elegans</i>      | DMSR-5 | KNTHLLLDYRIQVS  |
| <i>G. pallida</i>      | DMSR-5 | -----           |
| <i>M. hapla</i>        | DMSR-5 | -----           |
| <i>M. incognita</i>    | DMSR-5 | -----           |

Consensus

Comment [AM1]:

18. DMSR-6 homologues

```

B. malayi DMSR-6 MECPNSPQLFDEKDAIALSILSI VNEFLCL-SYRKLHKYVSMILCVFGLLANCTHIWILTRRPSXRSSVHTVLIICALADSGTMSYAIYLLRYEFCASST
W. bancrofti DMSR-6 MECPNSPQLFDEEDTIALSILSAVNEFLCL-SYRKLHKYVSMILCVFGLLANCTHIWILTRRPSMLRSSVHTVLIICALADSGTMSGYAIYLLRYEFCASST
O. volvulus DMSR-6 MECPNYPQLFDENDITVLSILSTLSELCLRFYRTFHKYVSMILCVFGLLANCTHIWILTRRPSMLRSSVHTVLIICALADIGTMSYAIYLLRYEFTSST
O. ochengi DMSR-6 MECPNYPQLFDENDITVLSILSTLSELCLFYRTFHKYVSMILCVFGLLANCTHIWILTRRPSMLRSSVHTVLIICALADIGTMSYAIYLLRYEFTSST
A. suum DMSR-6 -----FRFYRSFHRYSLLLCFLGLFFNFVHIWVLTTRPRMLQSSVHTVLIICALADIGTMSYLIYLLRYEFSRDEE
A. caninum DMSR-6 -----
N. brasiliensis DMSR-6 ---CKDPQLFDMNNNITHSVLQTLFLFQQ-TYSAVHRVAVLLCLFGLLANSTHIWVLTTRPRMQFSSVHTLLVCIASVDMGTMTSYLIYMTREFEQDHR
H. contortus DMSR-6 ---CKDEPLFDVDNNFTHNIIQTLFLFQQ-TYSSFHRYISVLLCLFGLLANSTHIWVLTTRPRMRFSSVHTVLIICALADIGTMSYLIYMTREFEQEST
C. elegans DMSR-6 -MECNDSPQLFDNNNTYFVIEQFYRFRY-LVSNVHPFLSFLCVLGLAANAHTITVLTTRPRMRHSSVHTVLIICALADIGTMSYLYMY-LSRFEFLSDK
S. ratti DMSR-6 -LNCTSLQLFDYNSDFSTKIIILNIFSEKSYYPQPFHKYISVILCLGIIITNTHIHWLTSRKQMRFSVHIVLFIASADIGTMSYLIYIIR-FEFFN-D
B. xylophilus DMSR-6 -----YGTIHRVVALIICLGLVINCIIHICLTLTRPRNRNSSVHTTLCIALADIGTMSYLVWYLTRFEYFSSST

```

Consensus PQLFD IL L F Y HKYVSMILCVFGLLAN IHIWILTRP M SSVHTVLIICALADIGTMTSYLIYLLRYEF SST

```

B. malayi DMSR-6 GGYSYGVVLLKLVVLSIALHSISLYLVVFTYIR--ICSVQTRQSOLLETRVAGIISLLISFAIFALCIPTLLAHDIVLQENSPHFIEIHPDLS
W. bancrofti DMSR-6 GGYSYGVVLLKLVVLSIALHSISLYLVVFTYIR--ICSVQTRQSOLLETRVAGIISLLISFAIFALCIPTLLAHDIVLRENSPHFIEIHPDLS
O. volvulus DMSR-6 GGYSYGVVLLKLVVLSIALHSISLYLVVFTYIR--LCSMOTQRSRLLETRVAGIISLLIALVIFALCIPTLLAHDILPQENN-SYLIKSTTLPTNFS
O. ochengi DMSR-6 GGYSYGVVLLKLVVLSIALHSISLYLVVFTYIR--LCSMOTQRSRLLETRVAGIISLLIALVIFALCIPTLLAHDILPQENN-SYLIKSTTLPTNFS
A. suum DMSR-6 NGYPYGVVLFKLVHAVTSIALHVAISLYLVVFMAYIR--LCAIRTTNSRWLQTRLAGFTSLMIALVVFVLCVPTLLAHEIYAQKRTLQYTTVTENEHTSS
A. caninum DMSR-6 -----LISIALHVAISLYLVVLMAYIR--FSAMRLSSSEWLRSESRRLAAGGIASVVFVLCVPTLLAHEIYSRRAISRQG-----
N. brasiliensis DMSR-6 G-YPYVSWALFLKLVVLSIALHVAISLYLVVLMAYIR--YSAMRVATSGWLQPRRSIAAIGIATCVFVLCVPTLLAHEITARRAVSTQGEVSKRYSIGFS
H. contortus DMSR-6 G-YPYGVAMFLKLVVLSIALHVAISLYLVVLMAYIR--YRAMRVVSSSEWLRSESRSMFTAIVIAICVVFVLCVPTLLAHDILARPPDSASGRQTALYSIGFS
C. elegans DMSR-6 EGYSYVWALFLKCHAMLSIALHVAISLYLVVLMAYIR--LSAMKLTTSRWLDHTRALTSALFIALVVFVLCVPTLLAHDIDETTRGVMTN-----
S. ratti DMSR-6 EGYAYKWTVFLHFHASVIALHGLSISLYLVVFMAYIR--CQVMKVKTGQSIWMLPHVALSASVITITLFLSIPTYLAHEIVERTTT-----
B. xylophilus DMSR-6 QGYAYVWALFLQVHAVLSIALHVAISLYLVVLMAYIR--LMAINAGQSKWMPRIALTAALFVITITVFTIPIPTFLAHEVQKNSAA-----

```

Consensus GGYSYGV LFLKLVVLSIALHVAISLYLVVFMAYIR L AMRT S WL TRVA L SLLIAL VFILCIPTLLAHDIL S

```

B. malayi DMSR-6 ----ESDSSSSNPKYSIGLSKMFVNSDCFLKLNWLWTGIMMKVIPCILLIIFLYCYLIVKLVKAKNKKK---RVALLRERAKDRVYKDHITCMLLLMVSSFL
W. bancrofti DMSR-6 ----ESYSSSNPKYSIGLSKMFVNSDCFLKLNWLWTGIMMKVIPCILLIIFLYCYLIVKLVKAKNKKK---RVALLRERAKDRVYKDRITCMLLLMVSSFL
O. volvulus DMSR-6 ----IPDPNPVTKKYTIGLSKMFVNSDCFLKLNWLWTGIMMKV-----AK-NKKK---RMALLRDRAKEKSYNDRTTYMLLLMVSIFL
O. ochengi DMSR-6 ----IPDPNPVTKKYTIGLSKMFVNSDCFLKLNWLWTGIMMKVTPCMLLCLTYCLIKLVKAKNKKK---RMALLRDRAKEKSCNDRTTYMLLLMVSIFL
A. suum DMSR-6 SEYNQEYYDSVDAKYSIGFSAMVLIQNGCMLLKNLWLWTGIMLKAIVPFLLLIWLTFALIVKLVKAKNKKRMLRLGKMKDKRDKGSLRDRITSMLLMLCVFL
A. caninum DMSR-6 -----
N. brasiliensis DMSR-6 -----D--MVLNESCLLKGNLWLTFIFLKAIPCVLLFWFTIALIGRMKENKEK---RKKLLKSRD-DKGRDVTTYMLVFMVAVFL
H. contortus DMSR-6 -----E--MVLNESCFLKGNLWLTFIFLKAIPCVLLFWFTIALIGRMKENKEK---RKKLLKSRD-DKGRDVTTYMLVFMVAVFL
C. elegans DMSR-6 -----GMYKYKSVGFTIMNQNGCSLMKGNLWLTFIFLKAIPCVLLIIFLIALNLRLENKEK---RKLKKEEAKKRGDFTTYMLLLMVTVFL
S. ratti DMSR-6 -----K---DGIIKYYTIIIRNYRANDCVAFKTYLWVTFILKAVPCFLMFPITLGLLKKLRENQKRNKLSRNRNSSKRNQTPDRITNKMLLLMVTIPL

```

*B. xylophilus* DMSR-6 -----Y N V G F S A L F M E N G C N L L K I N L W L T G I F I K A V P C F L L M C F T A A L I R R L R A N D K K -----R Q L L F H G E S R R S N S D R V T Y M L L L M V F V F L

Consensus V K Y S I G S M F V N C L L K L N L W L T G I M L K A I P C I L L T A L L K L R N K K K R L L L R R K D K D R T T Y M L L L M V S V F L

*B. malayi* DMSR-6 C T E L P Q G I I A I F N A I Y T A Q F H F Y V Y L T I A D I L D V L S L I N C Y V G F T V Y F C X C S R Y R R T F Y S I I F Y F G F V -----  
*W. bancrofti* DMSR-6 -----F P A I Y T A Q F H F Y V Y L T I A D I L D V L S L I N C H V G F T V Y F C T C S R Y R R T F Y S I L P Y F G F V -----  
*O. volvulus* DMSR-6 C T E L P Q G I I A I F N A I Y T A Q F H L Y I Y L T I A D V L D V L S L I N C Y V G F T V Y F C T C S R Y R R T F Y S V -----  
*O. ochengi* DMSR-6 C T E L P Q G I I A I F N A I Y T A Q F H L Y I Y L T I A D V L D V L S L I N C Y V G F T V Y F C T C S R Y R R T F Y S V -----  
*A. suum* DMSR-6 S T E L P Q G V M A V L N A I Y T K Q F H L F V Y I P L A D V L D L L S L I N C Y V G F T V F C T C T R Y R Q T L L T L F P Q Q C G C V T R S Q T P T H N S M L L Q Q G V P K R Y Y T P Q I D E H L T -----  
*A. caninum* DMSR-6 -----V W F L V Y V C T S R Y R Q T L L S I L P N M P -----  
*N. brasiliensis* DMSR-6 T T E L P Q G V M A V L N A I Y T S Q F H A Y V Y L S I A D V L D L L S L I N C Y V A F L V Y I C T C S R Y R Q T L L S I L P E R P L I L S A A T S H S T M K -----  
*H. contortus* DMSR-6 I T E L P Q G I M A V L N A I Y T S Q F H S Y V Y L S I A D V L D L L S L I N C Y V A F L V Y I C T C S R Y R Q T L L S I L P N M P -----  
*C. elegans* DMSR-6 F T E L P Q G I M A I L N A L F T T Q F H Q M V Y L N I A D V L D L L S L I N C Y V A F L V Y S F T S S R Y R Q T L F S L L P L T K I S Y S G I S T R Q G T L K S H Q H P G A K T L V Q R A N S V E V A -----  
*S. ratti* DMSR-6 I T E L P Q G I C A I L N A L F T Q Q F H E I V Y S N I A D V L D L L S L I N C F V A F I V Y T S T C S R Y R R L L D V L K P L -----  
*B. xylophilus* DMSR-6 V T E L P Q G L F A I L N A M E T Y Q F H R Y V Y V C F A D L D L L S L I N C Y V C F S V Y T A T S T Y R Q T L L M L V E -----

Consensus T E L P Q G I M A I L N A I Y T A Q F H Y V Y L T I A D V L D L L S L I N C Y V G F T V Y C T C S R Y R Q T L L S I L P

*B. malayi* DMSR-6 -----  
*W. bancrofti* DMSR-6 -----  
*O. volvulus* DMSR-6 -----  
*O. ochengi* DMSR-6 -----  
*A. suum* DMSR-6 S K N I A Q V S I M S T M Q T T V T I N G V T T I L A T E A D A F V -----  
*A. caninum* DMSR-6 -----  
*N. brasiliensis* DMSR-6 -----  
*H. contortus* DMSR-6 -----  
*C. elegans* DMSR-6 S A R S P L V D K A A I T R P N S A Q P T D F -----  
*S. ratti* DMSR-6 -----  
*B. xylophilus* DMSR-6 -----

Consensus

19. DMSR-7 homologues

|                               |                                                                                                                                                                                                                                                                                                                                                                                                                                                                                                                                                                                                                                                                                                              |
|-------------------------------|--------------------------------------------------------------------------------------------------------------------------------------------------------------------------------------------------------------------------------------------------------------------------------------------------------------------------------------------------------------------------------------------------------------------------------------------------------------------------------------------------------------------------------------------------------------------------------------------------------------------------------------------------------------------------------------------------------------|
| <i>T. spiralis</i> DMSR-7     | -----EIFLNVINQFHQ-QYQAVHGHLCIVLCLFGIVTNINCLVLTFRQMR-SASNMFIAI IALIDMGLMVLVLYVAHFVVQ                                                                                                                                                                                                                                                                                                                                                                                                                                                                                                                                                                                                                          |
| <i>T. muris</i> DMSR-7        | -----CSFSRSDLLTGNASAVFLDNTNQFHL-RYQHVHGHLCICLFGIVTNIVNFIVLTRSHMR-SASNMFIAI IALIDMSLMVLVLYVYARFVVIE                                                                                                                                                                                                                                                                                                                                                                                                                                                                                                                                                                                                           |
| <i>B. malayi</i> DMSR-7       | ---MLCVNDTP <del>LF</del> DLSDNATRLFLAAL <del>EA</del> FQR-SYSPVHGFICIVICTFSIGTNLIHILVLTFRPNMRC <del>SAVNCVLT</del> MTVAICDMGTMGSYFIYI <del>CHFV</del> LK                                                                                                                                                                                                                                                                                                                                                                                                                                                                                                                                                    |
| <i>W. bancrofti</i> DMSR-7    | ---MLCVNDTP <del>LF</del> DLSDNATRLFLAAL <del>EA</del> FQR-TYSPVHGFICIVICTFSIGTNLIHILVLTFRPNMRC <del>SAVNCVLT</del> MTVAICDMGTMGSYFIYI <del>CHFV</del> LK                                                                                                                                                                                                                                                                                                                                                                                                                                                                                                                                                    |
| <i>D. immitis</i> DMSR-7      | ---MLCVNDTP <del>LF</del> DLSDNATLLFLATL <del>EV</del> FKR-SYSPVHGFICIVICTFSIT <del>TNLVHIL</del> VLTFRPNMRC <del>SGVNCVLT</del> AVATCDI <del>GT</del> LASYFIYI <del>CHFV</del> LK                                                                                                                                                                                                                                                                                                                                                                                                                                                                                                                           |
| <i>O. volvulus</i> DMSR-7     | -----R-IYSPVQGFICIVICTFSIV <del>TNLVHT</del> VLTFRPNLRC <del>SGVNCIL</del> -----                                                                                                                                                                                                                                                                                                                                                                                                                                                                                                                                                                                                                             |
| <i>O. ochengi</i> DMSR-7      | -----R-IYSPVQGFICIVICTFSIV <del>TNLVHT</del> VLTFRPNLRC <del>SGVNCIL</del> -----                                                                                                                                                                                                                                                                                                                                                                                                                                                                                                                                                                                                                             |
| <i>L. loa</i> DMSR-7          | ---MLCVNDTP <del>LF</del> DLSNNT <del>TR</del> LLLAAL <del>EA</del> FQR-AYSPVHGFICIVICTFSIGTNLIHVLVLTFRPNMRC <del>SAVNCVLT</del> MTVAICDMGTMASYFIYI <del>CHFV</del> LK                                                                                                                                                                                                                                                                                                                                                                                                                                                                                                                                       |
| <i>A. suum</i> DMSR-7         | ---MLCVNDTP <del>LF</del> DFSSNSTR <del>FL</del> QFLAT <del>FQ</del> -AYAPVHGFICVAICTFGI <del>TNLVHVL</del> VLTFRSMRC <del>SAVNCVLT</del> AVAI <del>CDMGTMG</del> SYLVYI <del>CHFV</del> LK                                                                                                                                                                                                                                                                                                                                                                                                                                                                                                                  |
| <i>A. caninum</i> DMSR-7      | -----                                                                                                                                                                                                                                                                                                                                                                                                                                                                                                                                                                                                                                                                                                        |
| <i>N. brasiliensis</i> DMSR-7 | ---MECPNDTP <del>LF</del> DFSQNATRN <del>F</del> ISTLSNFRN-LYAPVHGYLCICL <del>CV</del> FGILT <del>TNLVHV</del> VVLSRFV <del>M</del> RNSAVNCVLTAVAI <del>CDI</del> GTMTYLYVYI <del>LHFV</del> FMR                                                                                                                                                                                                                                                                                                                                                                                                                                                                                                             |
| <i>H. contortus</i> DMSR-7    | ---MECPNDTP <del>LF</del> DFTONATLN <del>F</del> INTLINFQS-LYAPVHGYVCICL <del>CV</del> FGILT <del>TNFVHV</del> VVLTFRV <del>M</del> RNSAVNCVLTAVAI <del>CDI</del> GTMATYLYIYI <del>SHFV</del> LK                                                                                                                                                                                                                                                                                                                                                                                                                                                                                                             |
| <i>C. elegans</i> DMSR-7      | ---MECPHDAQ <del>LF</del> DPNSN <del>ST</del> QAF <del>LR</del> LKAH <del>FO</del> R-WYQPIHGYV <del>CV</del> LICV <del>FG</del> IF <del>TNFVHV</del> AVLSR <del>F</del> NMNSAVNCILTAVAI <del>CDI</del> GTMASYLYIYI <del>IHFV</del> LK                                                                                                                                                                                                                                                                                                                                                                                                                                                                        |
| <i>S. ratti</i> DMSR-7        | MARKLCPNDVSL <del>FS</del> GNDF <del>T</del> QLSLHYLDL <del>F</del> YN-FYAKPHGYICLVIC <del>FG</del> LV <del>TNLVHV</del> VLTFRKNL <del>R</del> KSAVNCIMTAVAF <del>CDMGT</del> MFTYLYI <del>NLHV</del> VLGF                                                                                                                                                                                                                                                                                                                                                                                                                                                                                                   |
| <i>B. xylophilus</i> DMSR-7   | -----SSQTKILH <del>F</del> PSYFS-FYAPVHGYICV <del>F</del> LCL <del>FG</del> FSS <del>N</del> FIH <del>V</del> IVL <del>T</del> RQSM <del>R</del> GSAVNSIMTAVAI <del>CDMGT</del> MASYLYIYI <del>CHFV</del> LK-                                                                                                                                                                                                                                                                                                                                                                                                                                                                                                |
| <i>G. pallida</i> DMSR-7      | --MHCAN-DPAL <del>FD</del> FDSNSTR <del>AF</del> IQSLV <del>L</del> FOR-AYAPVHGRICV <del>F</del> LCL <del>FG</del> VV <del>TNLH</del> CV <del>V</del> LTRPQMRV <del>S</del> AVNVIMTAVAI <del>CDL</del> GTMGSYLYIYI <del>VHFV</del> FQN                                                                                                                                                                                                                                                                                                                                                                                                                                                                       |
| <i>M. hapla</i> DMSR-7        | --MECGPDEPT <del>LF</del> NFENNSTR <del>Q</del> FTHSLV <del>L</del> FOR-AYAPVHGRICV <del>F</del> LCL <del>FG</del> VIT <del>TNLH</del> CV <del>V</del> LTRPQMRQ <del>S</del> AVNSIMTAVAI <del>CDL</del> GTMGSYLYIYI <del>WHFV</del> KK-                                                                                                                                                                                                                                                                                                                                                                                                                                                                      |
| <i>M. incognita</i> DMSR-7    | --MECGPNEAT <del>LF</del> NFENNSTR <del>Q</del> FTHSLV <del>L</del> FORAYAPVHGRICV <del>F</del> LCL <del>FG</del> VIT <del>TNLH</del> CV <del>V</del> LTRPQMRQ <del>S</del> AVNSIMTAVAI <del>CDL</del> GTMGSYLYIYI <del>WHFV</del> KK-                                                                                                                                                                                                                                                                                                                                                                                                                                                                       |
| Consensus                     | C ND LFD NAT FL L FQR YAPVHGFICIVICLFGIVTNLVHVLVLTFRPNMR SAVNCILTAVAI <del>CDMGTMG</del> SYLYIYI <del>HFV</del> L                                                                                                                                                                                                                                                                                                                                                                                                                                                                                                                                                                                            |
| <i>T. spiralis</i> DMSR-7     | Q---CSHFI <del>TY</del> SW <del>TW</del> FL <del>LL</del> HAL <del>FS</del> V <del>L</del> HTI <del>SL</del> WLAAL <del>F</del> ALV <del>R</del> LIV <del>I</del> RR <del>TQ</del> DV <del>S</del> L <del>L</del> TTR <del>F</del> IG <del>K</del> IFCY <del>L</del> ALS <del>V</del> AILS <del>I</del> PHAL <del>T</del> FT <del>V</del> VQ <del>E</del> TPV <del>C</del> KEH---                                                                                                                                                                                                                                                                                                                            |
| <i>T. muris</i> DMSR-7        | ED--RCQQT <del>M</del> H <del>T</del> Y <del>G</del> W <del>TW</del> FL <del>LL</del> HAL <del>V</del> SV <del>V</del> LHTI <del>SL</del> WLAAL <del>F</del> SLV <del>R</del> LIV <del>I</del> RR <del>KQ</del> DV <del>S</del> L <del>L</del> T <del>T</del> A <del>F</del> IT <del>R</del> LF <del>M</del> Y <del>L</del> ALS <del>V</del> AILS <del>I</del> PHAL <del>T</del> FR <del>V</del> V <del>P</del> EV <del>Y</del> LCKDS---                                                                                                                                                                                                                                                                     |
| <i>B. malayi</i> DMSR-7       | D---T <del>T</del> ---I <del>Y</del> SYL <del>W</del> M <del>R</del> Y <del>LL</del> CH <del>M</del> VLSIT <del>L</del> H <del>T</del> T <del>S</del> L <del>W</del> LIV <del>A</del> MA <del>F</del> I <del>R</del> Q <del>M</del> T <del>L</del> R <del>N</del> AI <del>L</del> NS <del>N</del> W <del>Q</del> K <del>P</del> Q <del>M</del> A <del>W</del> R <del>V</del> C <del>T</del> L <del>I</del> Y <del>F</del> C <del>V</del> F <del>I</del> L <del>C</del> I <del>P</del> T <del>F</del> L <del>M</del> Y <del>D</del> V <del>V</del> E <del>V</del> --G <del>D</del> W <del>H</del> P-AP                                                                                                        |
| <i>W. bancrofti</i> DMSR-7    | D---T <del>T</del> CV <del>L</del> I <del>Y</del> SYL <del>W</del> M <del>R</del> Y <del>LL</del> CH <del>M</del> VLSIT <del>L</del> H <del>T</del> T <del>S</del> L <del>W</del> LIV <del>A</del> MA <del>F</del> I <del>R</del> Q <del>M</del> T <del>L</del> R <del>S</del> A <del>I</del> L <del>N</del> S <del>N</del> W <del>Q</del> K <del>P</del> Q <del>M</del> A <del>W</del> R <del>V</del> C <del>T</del> L <del>I</del> Y <del>F</del> C <del>V</del> F <del>I</del> L <del>C</del> I <del>P</del> T <del>F</del> L <del>V</del> Y <del>D</del> V <del>V</del> E <del>V</del> --G <del>D</del> W <del>H</del> P-AP                                                                              |
| <i>D. immitis</i> DMSR-7      | N---C <del>S</del> -M <del>P</del> I <del>Y</del> SYL <del>W</del> M <del>R</del> Y <del>LL</del> Y <del>H</del> M <del>V</del> AS <del>I</del> AL <del>H</del> T <del>T</del> S <del>L</del> W <del>L</del> I <del>V</del> A <del>M</del> A <del>F</del> I <del>R</del> Q <del>M</del> T <del>L</del> R <del>N</del> T <del>V</del> L <del>N</del> S <del>S</del> W <del>Q</del> K <del>P</del> K <del>M</del> A <del>W</del> K <del>I</del> C <del>T</del> V <del>I</del> Y <del>I</del> T <del>V</del> F <del>L</del> L <del>C</del> I <del>P</del> T <del>L</del> L <del>M</del> Y <del>D</del> V <del>V</del> E <del>F</del> --G <del>D</del> W <del>R</del> P-AS                                       |
| <i>O. volvulus</i> DMSR-7     | -----                                                                                                                                                                                                                                                                                                                                                                                                                                                                                                                                                                                                                                                                                                        |
| <i>O. ochengi</i> DMSR-7      | -----                                                                                                                                                                                                                                                                                                                                                                                                                                                                                                                                                                                                                                                                                                        |
| <i>L. loa</i> DMSR-7          | D---T <del>T</del> CM <del>P</del> I <del>Y</del> SYL <del>W</del> M <del>R</del> Y <del>LL</del> S <del>C</del> H <del>M</del> VLSIT <del>L</del> H <del>T</del> T <del>S</del> L <del>W</del> LIV <del>A</del> MA <del>F</del> I <del>R</del> Q <del>M</del> T <del>L</del> R <del>N</del> AI <del>L</del> NS <del>N</del> W <del>Q</del> K <del>P</del> Q <del>M</del> A <del>W</del> K <del>V</del> C <del>L</del> L <del>I</del> Y <del>F</del> C <del>V</del> F <del>L</del> L <del>C</del> I <del>P</del> T <del>L</del> L <del>V</del> Y <del>D</del> V <del>V</del> E <del>I</del> --G <del>D</del> W <del>H</del> P-AP                                                                             |
| <i>A. suum</i> DMSR-7         | A---S <del>C</del> S <del>P</del> T <del>Y</del> SH <del>L</del> W <del>M</del> Q <del>F</del> LL <del>W</del> H <del>V</del> VLSIAL <del>H</del> T <del>T</del> S <del>L</del> W <del>L</del> AV <del>A</del> MA <del>F</del> I <del>R</del> RM <del>T</del> L <del>K</del> VAR <del>L</del> N <del>S</del> E <del>W</del> OR <del>P</del> Q <del>F</del> A <del>W</del> R <del>V</del> C <del>M</del> G <del>V</del> Y <del>A</del> V <del>F</del> V <del>L</del> C <del>I</del> P <del>T</del> L <del>L</del> V <del>H</del> D <del>I</del> E <del>Y</del> T <del>Q</del> A <del>E</del> W <del>H</del> P-PP                                                                                              |
| <i>A. caninum</i> DMSR-7      | -----PK <del>F</del> A <del>W</del> K <del>L</del> C <del>I</del> L <del>I</del> Y <del>V</del> C <del>V</del> F <del>I</del> M <del>C</del> I <del>P</del> S <del>V</del> F <del>V</del> H <del>E</del> I <del>S</del> L <del>Y</del> P <del>E</del> G <del>V</del> W <del>Q</del> P-TP                                                                                                                                                                                                                                                                                                                                                                                                                     |
| <i>N. brasiliensis</i> DMSR-7 | Q---S <del>T</del> C <del>S</del> P <del>T</del> F <del>T</del> H <del>G</del> W <del>M</del> Q <del>F</del> L <del>Q</del> W <del>H</del> V <del>M</del> L <del>S</del> I <del>T</del> L <del>H</del> T <del>T</del> S <del>L</del> W <del>L</del> AV <del>A</del> MA <del>F</del> I <del>R</del> RM <del>T</del> L <del>R</del> VAR <del>L</del> N <del>S</del> T <del>W</del> OR <del>P</del> Q <del>F</del> A <del>W</del> K <del>L</del> C <del>I</del> V <del>I</del> F <del>I</del> C <del>V</del> T <del>L</del> M <del>C</del> T <del>F</del> N <del>M</del> F <del>V</del> H <del>E</del> I <del>A</del> V <del>Y</del> E <del>G</del> A <del>V</del> W <del>E</del> P-ST                          |
| <i>H. contortus</i> DMSR-7    | Q---S <del>T</del> W <del>S</del> P <del>T</del> F <del>T</del> H <del>G</del> W <del>M</del> Q <del>F</del> L <del>Q</del> W <del>H</del> V <del>M</del> L <del>S</del> I <del>T</del> L <del>H</del> T <del>T</del> S <del>L</del> W <del>L</del> AV <del>A</del> MA <del>F</del> I <del>R</del> RM <del>T</del> L <del>R</del> VAR <del>L</del> N <del>S</del> T <del>W</del> OR <del>P</del> Q <del>F</del> A <del>W</del> K <del>L</del> C <del>I</del> A <del>I</del> Y <del>I</del> I <del>V</del> A <del>V</del> L <del>C</del> V <del>P</del> S <del>L</del> F <del>V</del> H <del>E</del> I <del>A</del> V <del>Y</del> E <del>G</del> I <del>V</del> W <del>E</del> P <del>P</del> H <del>P</del> |
| <i>C. elegans</i> DMSR-7      | N---N <del>S</del> C <del>T</del> P <del>T</del> F <del>T</del> H <del>S</del> W <del>L</del> Q <del>F</del> LL <del>W</del> H <del>V</del> VLSIT <del>L</del> H <del>T</del> T <del>S</del> L <del>W</del> LAV <del>A</del> MA <del>F</del> I <del>R</del> RM <del>T</del> L <del>R</del> V <del>T</del> A <del>L</del> N <del>S</del> W <del>Q</del> R <del>P</del> K <del>F</del> A <del>W</del> K <del>L</del> C <del>I</del> G <del>I</del> Y <del>M</del> V <del>V</del> F <del>V</del> L <del>C</del> I <del>P</del> N <del>M</del> L <del>V</del> H <del>E</del> I <del>A</del> R <del>V</del> E <del>G</del> N <del>D</del> W <del>R</del> P--G                                                     |
| <i>S. ratti</i> DMSR-7        | SFSTK <del>C</del> SN <del>K</del> N <del>S</del> Y <del>N</del> W <del>N</del> I <del>F</del> L <del>I</del> Y <del>H</del> V <del>I</del> G <del>S</del> I <del>L</del> L <del>H</del> S <del>T</del> L <del>W</del> LAV <del>A</del> MA <del>F</del> I <del>R</del> R <del>I</del> T <del>L</del> Q <del>T</del> N <del>S</del> F <del>N</del> S <del>S</del> W <del>Q</del> K <del>A</del> K <del>I</del> A <del>R</del> K <del>I</del> C <del>V</del> I <del>F</del> I <del>F</del> I <del>S</del> I <del>L</del> P <del>T</del> I <del>L</del> V <del>H</del> N <del>I</del> V <del>K</del> L <del>N</del> K <del>W</del> Y <del>P</del> K <del>D</del> E <del>G</del>                                 |
| <i>B. xylophilus</i> DMSR-7   | -----G <del>K</del> S <del>T</del> Y <del>L</del> S <del>M</del> S <del>F</del> L <del>L</del> F <del>H</del> M <del>F</del> L <del>S</del> I <del>T</del> L <del>H</del> T <del>T</del> L <del>W</del> LAV <del>A</del> MA <del>F</del> I <del>R</del> RM <del>T</del> L <del>H</del> T <del>T</del> L <del>H</del> S <del>Q</del> W <del>R</del> S <del>R</del> L <del>A</del> T <del>K</del> I <del>S</del> I <del>V</del> I <del>F</del> F <del>V</del> V <del>M</del> L <del>F</del> S <del>L</del> P <del>T</del> L <del>L</del> V <del>H</del> R <del>I</del> V <del>E</del> Y <del>E</del> A <del>D</del> V <del>W</del> R <del>P</del> -KP                                                          |
| <i>G. pallida</i> DMSR-7      | TP--N <del>C</del> S <del>N</del> P <del>Q</del> F <del>Y</del> W <del>W</del> M <del>L</del> F <del>L</del> L <del>H</del> I <del>F</del> F <del>S</del> I <del>L</del> L <del>H</del> T <del>A</del> L <del>W</del> LAV <del>V</del> M <del>A</del> L <del>R</del> RM <del>T</del> L <del>H</del> R <del>N</del> T <del>I</del> Y <del>S</del> H <del>W</del> Q <del>R</del> A <del>P</del> L <del>A</del> R <del>F</del> I <del>S</del> W <del>G</del> V <del>L</del> G <del>T</del> V <del>F</del> L <del>L</del> S <del>V</del> P <del>S</del> L <del>L</del> V <del>H</del> E <del>I</del> L <del>E</del> L <del>P</del> H <del>N</del> R <del>W</del> T <del>P</del> -SA                              |
| <i>M. hapla</i> DMSR-7        | -----SS <del>N</del> T <del>Q</del> T <del>H</del> I <del>W</del> Y <del>Y</del> L <del>L</del> L <del>H</del> I <del>F</del> I <del>S</del> I <del>L</del> L <del>H</del> T <del>A</del> L <del>W</del> LAV <del>L</del> M <del>A</del> F <del>I</del> RR <del>M</del> T <del>L</del> H <del>R</del> N <del>T</del> I <del>Y</del> S <del>K</del> W <del>Q</del> R <del>V</del> P <del>L</del> A <del>R</del> R <del>A</del> S <del>S</del> V <del>I</del> F <del>F</del> I <del>L</del> F <del>L</del> C <del>I</del> P <del>S</del> LAV <del>H</del> Q <del>V</del> I <del>E</del> Y <del>P</del> H <del>A</del> N <del>W</del> Q <del>P</del> -SL                                                        |
| <i>M. incognita</i> DMSR-7    | -----SS <del>N</del> T <del>Q</del> T <del>H</del> I <del>W</del> Y <del>Y</del> L <del>L</del> L <del>H</del> I <del>F</del> I <del>S</del> I <del>V</del> L <del>H</del> T <del>A</del> L <del>W</del> LAV <del>L</del> M <del>A</del> F <del>I</del> RR <del>M</del> T <del>L</del> H <del>R</del> N <del>T</del> I <del>Y</del> S <del>K</del> W <del>Q</del> R <del>V</del> A <del>L</del> A <del>R</del> R <del>A</del> S <del>S</del> V <del>I</del> F <del>I</del> L <del>L</del> L <del>C</del> I <del>P</del> S <del>L</del> A <del>V</del> H <del>Q</del> V <del>I</del> K <del>Y</del> P <del>H</del> A <del>N</del> W <del>Q</del> P-SL                                                         |

Consensus

S YTY WM FLL HMVLSI LHTTSLWLAVAMAFIRRM TLR LNS WQRP LAWKLCI IYI VFILCIPTLLVHDIV G W P

*T. spiralis* DMSR-7 -----SENASIRYTLMPSS-QLAIAAGDCFLLLKTTFWLNGFPPFKLVPCVILFVSIILSLVKFLSEAQAQKQRIIFGNNKRQQ-----  
*T. muris* DMSR-7 -----LHNTTLRLYTLMPSS-QLAIAIHGFLLMKMTFWLNGFPPFKLIPCVILFISILSLVKFLSEAQAQKFRRTFGNNRRQ-----  
*B. malayi* DMSR-7 HCSHSFP-----PNYTAKYTFHVS-PSAMANGCRFFKWNLWMSGIIFKVVPICILLIYFSSSLMLTLHQTTTRKRKLLIKYNSTK-----  
*W. bancrofti* DMSR-7 QCSHGFP-----PNYTAKYTFHVS-PSAMANGCRFFKWNLWMSGIIFKVVPICILLIYFSSSLMLTLHQTTTRKRKLLIKYNSTK-----  
*D. immitis* DMSR-7 HCAHHP-----TNYTAKDYTFHIS-SSAMANGCRFFKWNLWMSGVIKVPICITLLFYFSSALILKLNRVTKKRKLLIKCNVMT-----  
*O. volvulus* DMSR-7 -----FSSRLIILKLRHTTKKRKLLIKCRAT-----  
*O. ochengi* DMSR-7 -----FSSRLIILKLRHTTKKRKLLIKCRAT-----  
*L. loa* DMSR-7 HCAHDFP-----PNYTAKYTFHIS-SSAMANGCRFFKWNLWMSGIIFKVVPICILLIYFSSSLMLTLHRHTTKKRKLLIKCNSTK-----  
*A. suum* DMSR-7 DCEQYFP-----ANYTAKLYTLHP-ESATANGCRFFKLNLMWMSGVLFKVPICVLLFFLSIGLMMKLNHNSRKRREALLKKNFDS-----  
*A. caninum* DMSR-7 RCSQFP-----ANYSQPIYTFVTS-KEATANNCSLFKLNLMWIGIVFKVI-----  
*N. brasiliensis* DMSR-7 QCAMHFP-----PNYTLIYTFQVSKAETANNCSIFKLNLMWIGLVFKVPICILLMFFSVGLVKNKIRQAENNRKLLTNVSLNLNSTDAGAMS-----  
*H. contortus* DMSR-7 HCALSFP-----PNYTEPIYTFQVSKAETANNCRIFKLNLMWIGLVFKVPICILLMFFSVGLVKNKIRQAENNRKLLTNVSLNLNSTDAGAMS-----  
*C. elegans* DMSR-7 KTCQKFA-----SNYSEPVYTFMVS-HAATINNCRLFKWNLMWIGILFKIIPICILLIFLFGVSKIRDAEKHRKLLTSVPSN-----ASTDSKP-----  
*S. ratti* DMSR-7 KCLNDYGG--NENISFQRYTIDFP-EFVLKDNCRIFKGNLWLSGILNKVIPISLLFFLSFSLMSKLLKIAQEKRRKLLENGHKLSDHN-----  
*B. xylophilus* DMSR-7 SCMEFYP-----ANYTETIYTLAVS-PTAMHNGCRWFKANLWLTGTLFKVPICILLIILSSLLKLNKNAEQKRRKLLLNKGGVGNNTN-----  
*G. pallida* DMSR-7 QCSDIYF-----ANYSERLFTVLIIR-QSALANGCVLFRANLWLTGTLFKVPICVLLITLSCSLMQKLRMAERKQGDLLGNVRRNSAVPCGSSGG-----S  
*M. hapla* DMSR-7 LCPKVISGILSKNHSEPIFTIIR-NIAMANGCWLFRANLWLTGTLFKVPICILLIILSASLQRLRQAEKKRCQLLKLKGLGDSPNGRNSLDNLKQRQTN  
*M. incognita* DMSR-7 LCPKIISGILSKNHSEPIFTIIR-NTAMANGCWLFRANLWLTGTLFKVIPNLLIILSASLQRLRQAEKKRCQLLKLKGLSDSP-----

Consensus

C FP NYT IYT IS AMANGCRLFK NLWMSGIIFKVVPICILL SSSLM KL A KRRR LL N

*T. spiralis* DMSR-7 -----PVRYISRSSTTKLLVTLISFLITEIPQAI VATISGIFPAETIYAKIYPKVGDLLDLLALINCNANFILLCIMSSQFRTTASMF LPRRFQC-----  
*T. muris* DMSR-7 -----PTRYISRSSTTKLLVTLISFLITEIPQAI VATISGIIYPSDIYAKIYPKLGDLLDLLSLINSNANFILLCIMSSQFRTTASMF LPRPKF---  
*B. malayi* DMSR-7 -----IRRGVTKSDRTSALLLAI VLVFLIAEMPQGI IAIMNAIYTHVHIYIYFNLGDILDLLSLLNSSITFVLYCLMSSRYRDTFWTVVLPKHHFFRE  
*W. bancrofti* DMSR-7 -----IRGATKSDRTSALLLAI VLVFLIAEMPQGI IAIMNAIYTHVHIYIYFNLGDILDLLSLLNSSITFVLYCLMSSRYRDTFWTVVLPKHHFF--  
*D. immitis* DMSR-7 -----TKRSVIKSDRTSHLLLAI VLVFLIAEMPQGI IAIMNAVYTHVHQIYIYFNLGDILDLLSLLNSSITFVLYCLMS-SYRETFWTVVLPKCVFFS  
*O. volvulus* DMSR-7 -----KEMPQGI IAIMNAVYTHVHEYIYFNLGDILDLLSLLNSSITFVLYCLMFSRYRKTFWTVVLPKYLSS  
*O. ochengi* DMSR-7 -----KEMPQGI IAIMNAVYTHVHEYIYFNLGDILDLLSLLNSSITFVLYCLMFSRYRKTFWTVVLPKYLSS  
*L. loa* DMSR-7 -----TRRDVIKSDRTSALLLAI VLVFLIAEMPQGI IAIMNAIYTHVHIYIYFNLGDILDLLSLLNSSITFVLYCLMSSRYRDTFWTVVLPKHLFSE  
*A. suum* DMSR-7 -----TKKHTNVSDRTTAMLCVLI VLFLITELPQGI IAILNAIYTHVMIYIYFNLGDILDLLSLLNSSITFVLYCLMSSRYRDTFWTVVLPKPHVYRY  
*A. caninum* DMSR-7 -----  
*N. brasiliensis* DMSR-7 -----AKKSHKSDRTTAMLVVILAVFLITELPQGI IISILCAIFTADVHKYLYFHLGDILDLLSLLNSSITFVLYCLMSSRYRDTFWLVFLPAGAHPL  
*H. contortus* DMSR-7 -----AKK-SHRSDRTTAMLVVILAVFLITELPQGI IISILCAIFTADVHKYLYFHLGDILDLLSLLNSSITFVLYCLMSSRYRDTFWLVFLPAG--AL  
*C. elegans* DMSR-7 -----LKKKNGTSDRTTAMLVVILAVFLITELPQGI IISILCAIFTADVHRVLYFYHGDVLDLLSLLNSSITFVLYCLMSSRYRDTFWEVILP SWACGL  
*S. ratti* DMSR-7 -----TMKRKYTDKTPMLLAILI VFLMTEVPQGVVMIITAIYINDGFNVLYKLNADILDLLSLLNSSITFVLYCLMSSRYRDTFWVLLPKNFQNI  
*B. xylophilus* DMSR-7 -----KRITSDKTTVMLLAILAVFLITELPQGI IISILCAIFTADVHRVLYFYHGDVLDLLSLLNSSITFVLYCLMSSRYRDTFWVLLPKNFQNI  
*G. pallida* DMSR-7 PAALSGTSLKKINSDRTTAMLVVILAVFLITELPQGI IAILNAIYADVHRVLYYLTGDVLDLLSLLNSSITFVLYCLMSSRYRDTFCSLLI IAGCKR  
*M. hapla* DMSR-7 IGLKKFLKNNKRMNADRTTGMLLAILI VFLMTEVPQGI IAILNAIYADVHRVLYYLTGDVLDLLSLLNSSITFVLYCLMSSRYRDTFCSLFLP IQIC--  
*M. incognita* DMSR-7 -----RMHADRSSGLLAILI VFLMTEVPQGI IAILNAIYADVHRVLYYLTGDVLDLLSLLNSSITFVLYCLMSSRYRDTFCSLFLP IKIC--

Consensus

K SDRTT LLLAIL VFLITELPQGI IAILNAIYTTDVH YIYF LGDILDLLSLLNSSINFLVLYCLMSSRYR TFWTVVLPK

*T. spiralis* DMSR-7 -----  
*T. muris* DMSR-7 -----  
*B. malayi* DMSR-7 FTRKKTSEMLSS-----EMHSTQKQINK-----  
*W. bancrofti* DMSR-7 Q--KKTSEMLSS-----EMHFTQKQIKQTIPCNNNCETRILK-----  
*D. immitis* DMSR-7 R--KKTSEILLS-----EMHSMQKGMKYTVASSSNYSG-----  
*O. volvulus* DMSR-7 V--KHTVASSN-----YNRTILK-----  
*O. ochengi* DMSR-7 -----  
*L. loa* DMSR-7 FIRKTSRMLPS-----EMRFMQKQVKRTVSSSNYEAKILK-----  
*A. suum* DMSR-7 FCIKKTSLEMISSMPAGTLKPQNRATKILINNNTTRKNSRKSGCNHDNYRAITEESDDYSMPLFPEAHSDDL-----  
*A. caninum* DMSR-7 -----  
*N. brasiliensis* DMSR-7 CVNKQTTTTSNFNFTTPIPIQRKNSNKVRSKEYAPLATEAEEQRDD-----  
*H. contortus* DMSR-7 CINKQTATASNLFNFTQIQQLQRKNSNKVRNKEYAPLATEAEEHRDE-----  
*C. elegans* DMSR-7 WTRRGSPTELSQLQLNNSLRG---RKQSYTPLATEPEPARNEYWRYEASVDNQNSREHQL-----  
*S. ratti* DMSR-7 IINKNGITTLFFFTKEFIPSTSNGNQLLKMKSTSLQNNINEELNFLNKKKDIINNKNDKQSVSIKKIGTSQYRGMKKLKN SIGEKNCFFVYEDKNQDITNVC-----  
*B. xylophilus* DMSR-7 -----  
*G. pallida* DMSR-7 CVATAHQSLPMVPSFASQADRDNNRIARTVDTGRRR-----  
*M. hapla* DMSR-7 -----  
*M. incognita* DMSR-7 -----

Consensus

K

*T. spiralis* DMSR-7 -----  
*T. muris* DMSR-7 -----  
*B. malayi* DMSR-7 -----  
*W. bancrofti* DMSR-7 -----  
*D. immitis* DMSR-7 -----  
*O. volvulus* DMSR-7 -----  
*O. ochengi* DMSR-7 -----  
*L. loa* DMSR-7 -----  
*A. suum* DMSR-7 -----  
*A. caninum* DMSR-7 -----  
*N. brasiliensis* DMSR-7 -----  
*H. contortus* DMSR-7 -----  
*C. elegans* DMSR-7 -----  
*S. ratti* DMSR-7 DTNSIFEDNKEEYSIAKIEGDIQI-----  
*B. xylophilus* DMSR-7 -----  
*G. pallida* DMSR-7 -----  
*M. hapla* DMSR-7 -----  
*M. incognita* DMSR-7 -----

Consensus

## 20. DMSR-8 homologues

```
T. muris DMSR-8 -----VDHFQG-AYQRIHPYLSSTVCSLGIVLNVLNIVILTRSRMKLCPTNVILTAISICDLFCVMTTYLMTQAEITGFHA--
T. spiralis DMSR-8 -----CNRVDFFSQSGYNRVHPYLSSTVCSLGMIFNLVNIIVILTRTRMKLCPTNVILTAISICDFCVMTTYLMTSLSQITNFHQ--
B. malayi DMSR-8 -MNGGACEIGSVPFQNAATWLFATLSNFHVTYGVHPHYIYAVILCFAGTILNVMTIYAVLTRP-SMISPVNVLLCSVAICDVLVMSYLIFFVTHFLINAANRC
W. bancrofti DMSR-8 -MNGGACEIGSVPFQNAATWLFATLSNFHVTYGVHPHYIYAVILCFAGTILNVMTIYAVLTRP-SMISPVNVLLCSVAICDVLVMSYLIFFVTHFLINAANRC
D. immitis DMSR-8 -MNGGACEIGSVPFQNAATWLFATLSNFHVTYGLIHPYIYAVILCFAGTILNVMTIYAVLTRP-SMISPVNVLLCSVAICDVLVMSYLIFFVTHFLISAANRC
O. volvulus DMSR-8 MNGGGACEIGSVPFQNAATWLFATLSNFHVTYGLIHPYIYAVILCFAGTILNVMTIYAVLTRP-SMISPVNVLLCSVAICDILVMSYLIFFVTHFLINAANRC
O. ochengi DMSR-8 --GGGACEIGSVPFQNAATWLFATLSNFHVTYGLIHPYIYAVILCFAGTILNVMTIYAVLTRP-SMISPVNVLLCSVAICDILVMSYLIFFVTHFLINAANRC
L. loa DMSR-8 -MNGGACEIGSVPFQNAATWLFATLSNFHVTYGVHPHYIYAVILCFAGTILNVMTIYAVLTRP-SMISPVNVLLCSVAICDVLVMSYLIFFVTHFLINAANRC
A. suum DMSR-8 -----IGSVPLPNITWLSAIAQFDSSYGAVHPYIYAVILCFVSGTIMNLTIVIVLTRP-SMISPVNVLLCSVAICDVLVMSYLIFFVSHFLIGAANRC
A. caninum DMSR-8 -----MGALLVRNAEWLADAVAVLHGAYAHHPYMAVALCLAGTAMNAVTVVVLTRP-SMISPVNVLLCSVAICDILVMTSVLVFVYHFLISASFRC
N. brasiliensis DMSR-8 -----FRC
H. contortus DMSR-8 -----MGALPLTDAEWLSDAVSTLHSAVAHLHPYMAVVLCLAGTVMNAVTVVVLTRP-SMISPVNVLLCSVAICDILVMTSVLVFVYHFLISANFRC
C. elegans DMSR-8 -----MGSVNFTGAEWLETAVTNINTAYAHHPYVSVLCLAGTAMNLTIVIVLTRP-SMRSAVNSLLCAIALCDILVMTSVLVFVTHFLIFAGYRC
S. ratti DMSR-8 -MSFDCTCSSNVVVFVENNFQVWKYLYLYSEYHSNVALGICIIIGILLNITVAVLSRP-IMRNSINILCFIACDILVMTSVLVFVTHFLIFAGYRC
B. xylophilus DMSR-8 -----IGSILLPNIITWLTGQVNAFQSSYVEIHQVYATFCLIVGTLNLTIVVVLTRP-SMISPVNVLLCSVAICDILVMTSVLVFVTHFLIFAGYRC
G. pallida DMSR-8 -----IGSILEMPPEEWLFSGAASFQSSYQVHPYIYAVILCFVSGTIMNLTIVIVLTRP-SMRSPVNVLLCSVAICDILVMTSVLVFVTHFLIFAGYRC
M. hapla DMSR-8 -----ICTLEMPPLEWLFATAAFQQNYCQIHPYIYAVILCFIAGTAMNLTIVIVLTRP-SMRSPVNVLLCSVAICDILVMTSVLVFVTHFLIFAGYRC
M. incognita DMSR-8 -----IGTLEMPPLEGLTATAAFQQNYCQIHPYIYAVILCFIAGTAMNLTIVIVLTRP-SMRSPVNVLLCSVAICDILVMTSVLVFVTHFLIFAGYRC
```

Consensus

IGSV NA WLF ALA F TYG IHPYIYAVILCIAGTILNVTVVVLTRP SMISPVNVLLCSVAICDILVMTSVLVFVTHFLIFAGYRC

```
T. muris DMSR-8 STPTGMFYWAVFVLIHNSASVVLHAG-----
T. spiralis DMSR-8 SSSSCMFYWALFVLFHNSASVVLHATSIWLT-VLLASIRVYSVRRALRRSLW-HCSPRSAAARYSVAIFLIALLDIPMLSFGLIQRWATENATVANSTE
B. malayi DMSR-8 LHTDYSYPWTIFFTLIHAHASVILHSTSIWLT-VLLAQIRVLTIRRSILHPST-TVTIRFTVLLSLATCSIMSLFNLPNFLTFFKIVRTSPELFLPCLVKFS
W. bancrofti DMSR-8 LHTDYSYPWTIFFTLIHAHASVILHSTSIWLT-VLLAQIRVLTIRRSILHPST-TVTIRFTVLLSLATCFIMSLFNLPNFLTFFKIVRTSPELFLPCLVKFS
D. immitis DMSR-8 LHTDYSYLWTFIFFTLIHAHASVILHSTSIWLT-VLLAQIRVLTIRRSILHPST-TVTIRFTVLLSLATCFIMSLFNLPNFLTFFKIVRTSPELFLPCLVKYS
O. volvulus DMSR-8 LHTDYSYPWTIFFTLIHAHASVILHSTSIWLT-VLLAQIRVLTIRRSILHPST-TVTIRFTVLLSLATCFIMSLFNLPNFLTFFKIVRTSPELFLPCLVKYS
O. ochengi DMSR-8 LHTDYSYPWTIFFTLIHAHASVILHSTSIWLT-VLLAQIRVLTIRRSILHPST-TVTIRFTVLLSLATCFIMSLFNLPNFLTFFKIVRTSPELFLPCLVKYS
L. loa DMSR-8 LHTDYSYPWTIFFTLIHAHASVILHSTSIWLT-VLLAQIRVLTIRRSILHPST-TVTIRFTVLLSLATCFIMSLFNLPNFLTFFKIVRTSPELFLPCLVKYS
A. suum DMSR-8 DYNDYSFAWAVFTLFAHASVIFHSTSIWLT-VSLAQIRVLTISRATSGPTT-TITTRFTVALSFIITCLIMASVNIIPNFLTFFIEMAASTFLS-----
A. caninum DMSR-8 DPDDYDRMWAYFLFAHSQSTVILHATSIWLT-VLLAK-----
N. brasiliensis DMSR-8 DPDDYDQIWAYFLFAHSQSTVIFHATSIWLT-VVQVA-----
H. contortus DMSR-8 DPEDYDKKWAYFLFAHSQSTVILHATSIWLT-VLLAQIRVYTIKRATAGPSE-AISARSTGGIALLILCVVALVNIIPNFLTFFIEMADELWLPCL----
C. elegans DMSR-8 DPTDYNIYWAYFLYHSQATVIFHATSIWLT-VLLAQIRVFSIRRAATSVAGE-SVINQMTCLIAVTFIVVCLLNVPNMLTFFIETPASLWLQCKANET
S. ratti DMSR-8 SIDSYSYGAWAFMMFHANSSVIVHSTSLWLT-VSLAQIRLLTIRKATVGPTG-MFSEKATVYLSIATFFTFMIVNIIPNLSMEIFSTDSIQFFKPFGLT
B. xylophilus DMSR-8 QLQDYSYGAWAFMMFHANSSVIVHSTSLWLT-VSLAQIRVLTIRRAATAGPTT-QITFERFSIILAIIVLILMAAVNLPNFLTFFIEMADELWLPCL----
G. pallida DMSR-8 EPDYSYGAWAFMMFHANSSVIVHSTSLWLT-VSLAQIRVLTIRRAATAGPTT-PLITERFTVLLAVLMLCAMTIVNIIPNFLTFFIEMADELWLPCL----
M. hapla DMSR-8 EPDYSYGAWAFMMFHANSSVIVHSTSLWLT-VVMAQLRVLTIRRAATAGPTT-PLITERFTALIALLLTIVS-----LN-----
M. incognita DMSR-8 EPDYSYGAWAFMMFHANSSVIVHSTSLWLT-VVMAQLRVLTIRRAATAGPTT-PLITERFTALIALLLTIVS-----LN-----
```

Consensus

TDYSY WAIFML HAHAVILHATSIWLT VLLAQIRVLTIRRAT PST VT RFTVLLSL T IIMSL NLPNFLTIV IV... FL C

*T. muris* DMSR-8 -----L L F K V V P C I L Q S L I G M L I Y L L K Q A R F R R K R L S S G A I N R S  
*T. spiralis* DMSR-8 M S S F Y -----V T S I -----S T F A Q K N D R I L L K F A F W C N G V S F K V V P C I F Q S I L I G M L I H L L R K A R F R R K R M S S G A I H R S  
*B. malayi* DMSR-8 E N S S L -----H D K V D D D Y T E Q N S -----D Y S Q Y N D F Y P V Y M L V A S Q G N C L K L K L A F W S N G I L F K V V P C L L L T I S I I V L L K V I A D L S R Q R R -H L A Q L M K R -  
*W. bancrofti* DMSR-8 E N S S L -----Y D K V D D D Y T E Q N S -----D Y S Q Y N D F Y P V Y M L V A S Q G N C L K L K L A F W S N G I L F K V V P C L L L T I S I I V L L K V I A D L S R Q R R -H L A Q L M K R -  
*D. immitis* DMSR-8 K N S S L L S I D N S K L D D E Y V Q N S D Y S Q Y D D D N D D N F Y P V Y M L V A S Q G N C M K L K L A F W S N G I L F K V V P C L L L T I S I I V L L K V I A D L S N Q R R -T L A Q L M K R -  
*O. volvulus* DMSR-8 K N S S L S L S I D N D K F D D D Y S Q N ---L E Y V D D S D D -F Y P V Y M L V A S Q G N C M K L K L A F W S N G I L F K V V P C F L L T V S I I V L L K V I A D L S N Q R R -T L A Q L M K R -  
*O. ochengi* DMSR-8 K N S S L S L S I D N D K F D D D Y S Q N ---L E Y V D D S D D -F Y P V Y M L V A S Q G N C M K L --A F W S N G I L F K V V P C F L L T V S I I V L L K V I A D L S N Q R R -T L A Q L M K R -  
*L. loa* DMSR-8 E N S S S -----Y S K I D D Y S E Q N P -----D Y S Q H D D F Y P V Y M L V A S Q G N C V K L K L A F W S N G I L F K V V P C L L L T V S I I I L L K V I A D L S H Q R R -T L A Q L M K R -  
*A. suum* DMSR-8 -----C L K L A F W S N G M I F K V V P C F L L T I S I A A L L K I I A D V S H R R R -S L A Q V M K K  
*A. caninum* DMSR-8 -----V A F W E N G I L F K V P F A L L T V S I I A L L K I I K D V S V R R K -S L A Q V M K K  
*N. brasiliensis* DMSR-8 -----F W T N G ---L L F K V V P C L L L T I S I I A L L K I I R D V S H R R K -S L A Q V M K K  
*H. contortus* DMSR-8 -----T S A T ---Q E E V A F W T N G I F F K V V P C L L L T V S I I A L L K I I R D V S H R R K -S L A Q V M K K  
*C. elegans* DMSR-8 -A E -----D D M L V Y I V A P S D H C G L N I A F W T N G V L F K V V P C L L L T F S I V A L V S I I R D V G K R R K -Q L A Q V M K K  
*S. ratti* DMSR-8 I T N Y D D K V I Y N F P -----S S E N E T I E N I D K I E S N I K Y L A S Y V R -K N N C I M K I S Y W I N G A I Y K I V P C V L L T I S I V A L L K M I K D V K K R R L -K L A E C T K R -  
*B. xylophilus* DMSR-8 -----F Q M A F W S N G M I F K V V P C L L L T V S I V A L L K I I A D V S N K R K -N L A Q V M K K  
*G. pallida* DMSR-8 -----Q S S P A D M D Y T V R A H D S D C M K L K L A F W S N G M I F K V I P C L L L T L S I W A L L R I I A D V A H K R R -N L A Q V M R K  
*M. hapla* DMSR-8 -----E P I V Y T V R A H E S D C M N L K L A F W T N G I L F K V I P C I L L T L S I A A L L R I I A D V A H K R K -N L A Q V M R K  
*M. incognita* DMSR-8 -----E P I V Y T V R P H E S D C M N L K L A F W T N G I L F K V I P C I L L T L S I A A L L R I I A D V A H K R K -N L A Q V M R K

Consensus

E V Y L A CM LKLA FWSNGILFKVVPCLLLTISIIALLKIIADVS RRK LAQVMKK

*T. muris* DMSR-8 L R D Y D K S T P M L I A L L A A F L I A E L P Q G I L L G T A L F K D F R T K V ---Y I K S G P F M D L L S L L N -----  
*T. spiralis* DMSR-8 L R D Y D R S T P M L I V L L A A F L I A E L P Q G I L L V G T A I F K D F R T K I ---Y I K S G A F M D L L S L M N S A V T F V I Y T S M S A A F R R L F F A I F I P F F R T S S P Y E P T ----  
*B. malayi* DMSR-8 K V P K D H T P M L V A V L S I F L I T E L P Q G V M N V L T G I F T G D T F H Q -K V Y L P L G D F M D L L S L I N S A V N F L I Y C I M N K R F R V T F L Q L F C G F F T N R K L S R V V E D Y S  
*W. bancrofti* DMSR-8 K V P K D H T P M L V A V L S I F L I T E L P Q G V M N V L T G I F T G D T F H Q -K V Y L P L G D F M D L L S L I N S A V N F L I Y C I M N K R F R V T F L Q L F C G F F I N R K L S R V V E D Y S  
*D. immitis* DMSR-8 K V P K D H T P M L V A V L S I F L I T E L P Q G I M N V L T G I F T G D T F H Q -K V Y L P L G D F M D L L S L I N S A V N F L I Y C I M N K R F R I T F L Q L F C D F C T N Q K L S -I A E D Y S  
*O. volvulus* DMSR-8 K V P K D H T P M L V A V L S I F L I T E L P Q G V M N V L T G I F T G D T F H Q -K V Y L P L G D F M D L L S L I N S A V N F L I Y C I M N K R F R I T F L Q L F C D F C P N R K L S R I V E D Y S  
*O. ochengi* DMSR-8 K V P K D H T P M L V A V L S I F L I T E L P Q G V M N V L T G I F T G D T F H Q -K V Y L P L G D F M D L L S L I N S A V N F L I Y C I M N K R F R I T F L Q L F C D F C P N R K L S R I V E D Y S  
*L. loa* DMSR-8 K V P K D H T P M L V A V L S I F L I T E L P Q G V M N V L T G I F T G D T F H Q -K V Y L P L G D F M D L L S L I N S A V N F L I Y C I M N K R F R I T F L Q L F C D E C A N R K F S R V V E D Y S  
*A. suum* DMSR-8 K M P K D H T P M L V A V L S I F L I A E L P Q G V M S V L T G I Y S R E T F H Q -K I Y L P L G L M D L L S L I N S A V N F L I Y C A M S R K F R I V F L Q L F I K S L P S A F F R ----  
*A. caninum* DMSR-8 R M P R D H T P M L V A V L S I F L I A E L P Q G M L H V C N A I Y S N E T F Y Q -K I Y L P L G L M D L L S L I N S A V N F L I Y C A M S R K F R T V F L Q T F L A C L P D P L Y R K F L Q D W P  
*N. brasiliensis* DMSR-8 R M P R D H T P M L V A V L S I F L I A E L P Q G M L H V C N A I Y S N E T F Y Q -K V -----  
*H. contortus* DMSR-8 R M P R D H T P M L V A V L S I F L I A E L P Q G M L H V C N A I Y S N E T F Y Q -K I Y L P L G L M D L L S L I N S A V N F L I Y C A M S R K F R T V F M Q T F L S C L P D P L Y R K F L K D W P  
*C. elegans* DMSR-8 R M P R D H T P M L V A V L S I F L I A E L P Q G V L H V F N A I F T K E T F Y Q -K I Y I H L G D V M D V L S L I N S A V N F I I Y C A M S R K F R A V F I Q I F L T C L P Q K I I R K Y A M E A F  
*S. ratti* DMSR-8 K I P K D H T P M L A C V L I I F L I T E L P Q G I L L H L L S G I Y H E S F Q D -H I I K F F G D F S D L L S I T N S A T S F L I I Y C T M S R K F R A V F F A F F C D W L P K P I K H H I R E T D R  
*B. xylophilus* DMSR-8 K V P K D H T P M L V A V L S I F L I A E L P Q G I L L V M T G I F S D T F F K K T V I Y Q L G D F M D F L S L A G F F I Y V G M S R K F R S V F F Q L F F S L I H C T P Y R ----  
*G. pallida* DMSR-8 K V P K D H T P M L A A V L L I F L L A E L P Q G I F L V I N G I F S A E S F H K -R V Y L P L G D L M D L L S L I N S A V G F L I Y V G M S R K F R T V F L Q L L F S ----  
*M. hapla* DMSR-8 K V P K D H T P M L A A L L I I F L L A E L P Q G I L L V I N G I F S S E S F H K -R V Y L P L G D L M D L L S L I N S A V G F L I Y V G M S R K F R T V F L Q I L F S F L ----  
*M. incognita* DMSR-8 K V P K D H T P M L A A L L I I F L L A E L P Q G I L L V I N G I F S S E S F H K -R -----V N S A V G F L I Y V G M S R K F R T V F L Q I L F S V L ----

```

Consensus      KVPKDHTTPMLVAVLSIFLIAELPQGVL VLTGIFS ETFHQ KVYLPLGDFMDLLSLINSAVNFLIYC MSRKFR VFLQLF F          D
T. muris DMSR-8  -----
T. spiralis DMSR-8 -----
B. malayi DMSR-8  RMDYAYE SPGQRN--RST DVSRTEQLIPTS QHQPSATS VFTSLSVTRE EPLQNYRKF FTGNLLTVEGNHCRRMTIVTGQAIINDNLRCYIIMYTSTISHV
W. bancrofti DMSR-8 RMDYAYE SPGERN--RST DVSRTEQLMPTS QHQPSATS VFTSLSVTRE EPLQNYRKF FTGNLLTVEGNHCRRMAIVAGQESKE-----
D. immitis DMSR-8  RVEYAYE SQRQHN--RSI DISRTEQLM-LT QHRPSAAS VFTNSSTRDE PLKNQKFTGNLLTVDGNQYRRMTILAKQ-----
O. volvulus DMSR-8  RVEYAYE SSRQPN--RSA DISRTEQLM-LT QHRPSAAS VFTNLSSTRE EQLKNQKFTGNLLTVEDNHYRRMTILAKQ-----
O. ochengi DMSR-8  RVEYAYE SSRQPN--RSA DISRTEQ---VT QHRPSAAS VFTNLSSTRE EQLKNQKFTGNLLTVEDNHYRRMTILAKQ-----
L. loa DMSR-8      RMDYAYELPGQRN--RSA DISRTEQLMLTS QHRPSATS VFTSLSVTRE EPSKNHRKF FTGNLLTVEGNQCRRTTIVTKQESKE-----
A. suum DMSR-8      -----SAQR---LRRNYVVENASQLALTS HRPSATS VLVSIG--PRDDRMLYRKYGDNLIT-----
A. caninum DMSR-8  ALAEMEL SRHKPS--GFT DLTKTEQ--LALTS HRVSA TSM LIHAAS--KE--STSKMYTGNLLSVDTPGPRVDFDARPGTDLMARNLEIHEIRLVVDPDT
N. brasiliensis DMSR-8 -----
H. contortus DMSR-8  ALAELMEL SRHKPS--GLT DLTRSEQ--LALTS HRVSA TSM LIHATA--KE--STSKMYTGNLLSMSK----IRHFWENGTNAIE--SSPQRINLIKCE'T
C. elegans DMSR-8  LDVEVSRMRPTAD-----MTKSEQ--LALTS HRVSA SSVLLPISRDPDPRMYSGNLLTADTNGGYSTSPRVSFDIRKESQISSVDFQLVVPNMQQDS
S. ratti DMSR-8    FETKTDAT KIKSSRGNIIES MYDYTQHRLS IASSFAGELFNTIRDDRKMSWLSRKISNIKVKKNDANNLESTIEHKKSNFLTVPSSYLPRISLTIEVD
B. xylophilus DMSR-8 -----
G. pallida DMSR-8 -----
M. hapla DMSR-8 -----
M. incognita DMSR-8 -----

Consensus      S          DISRTEQ      S H SA SV          E          R FTGNL

```

## 21. EGL-6 homologues

*A. suum* EGL-6 -----FLQVYDQIHIPLSLTICVFGAISNVFNIIVLTRR--MRTPINVLLAGLSFSQW-----  
*C. elegans* EGL-6 MENIEHNSDFSAMNDTLICTYFECYIHMFAMYDEIHIPLSISICIFGAASNVFNIIVLTRKR-MRTPINILLTGLSIAQWLLATNYFLYLLEYYRYQ  
*A. caninum* EGL-6 -----VYSRKT-MRNPINILLCGLSAAQWLLASN-----  
*B. xylophilus* EGL-6 -----YDRIHIPLSLTICVFGSISNIVNILLVLTTRKTMRTIPINIFLTGLSMAQFRLLAL-----  
 Consensus F YD IHIPLSITICVFGAISNVFNIIVLTRKK MRTPINILLTGLSIAQWLLASNYFLYLLL

*A. suum* EGL-6 -----  
*C. elegans* EGL-6 CVQLLWSEAFTRYRFFNVNLTVFHTIAFTTTTIVAVFRYCALKFPFQANRFIYKCPAIAANVILWIIIPFISLPLFISEVKIVARDHVAYDLQCEME  
*A. caninum* EGL-6 -----  
*B. xylophilus* EGL-6 -K-----WPLRANRFLRCNTWALACSLGIWIIIPFLCIPVFLTSYVALVD-----DNRGCNF  
 Consensus FPI ANRFIF AIA L IWIIP I IPLF S V IV D

*A. suum* EGL-6 --MYDLNYSQNAALVKFVFWFMFGIVLKPFG-----  
*C. elegans* EGL-6 GPLYDLSYQFSPLLVSAPVWAFGIVFKLLPSLILSILLIALIRSLKSVERRRKNWKRTQGANICTNSERKAKRKLTRPRTRTMLVIILLLCVMVELPMG  
*A. caninum* EGL-6 -----  
*B. xylophilus* EGL-6 KGMYDLTYSEDSFLVSAPVWFMFGIVLKPFG-----  
 Consensus MYDLSYSE A LVSAVFWFMFGIVLKPFG

*A. suum* EGL-6 ALNLCGTYGETFGIRIYDHLGSMEMLTLLYSSISFVLYCSMSNDFLHTRQSLF-----  
*C. elegans* EGL-6 ILNLCVAIYGEEFCNRYDVPVGNLMEMLTLLYSSVSVLYCTMSNEYLSFRALFFPWTRENSLRGTRRSWNHRHDETKSPRTFLINRTAPSSYVGS  
*A. caninum* EGL-6 -----  
*B. xylophilus* EGL-6 ILNLFTAIYGDKFGVHIYDQLGSMEMLTLLYSSISFVLYCVTSNDFLRTRQLFLNSKKE-----  
 Consensus ILNLCVAIYGE FGIRIYD LGSFMEMLTLLYSSISFVLYCSMSNDFL TRALF KK

## 22. FRPR-3 homologues

*A. suum* FRPR-3 -----S T I C V V V M I I M C V G V G N S L S L Y V Y W T P T F R K R S I N L L A A L S A S D L F  
*A. caninum* FRPR-3 -----L I A L L S Q I C G A V M I V L C I F C V V G N S L S L Y I Y T R P A F R K R S I N I L L S A L S A T D I S  
*N. brasiliensis* FRPR-3 -----M I L L L S R V L V N V M V L M C F G I I T N F I S F Y I Y T R K T F R K R S I N V L L A A L S M S D I C  
*H. contortus* FRPR-3 -----V L S I I C F V M C I I G V I T N T F S I I I Y T S V N F R K R S I N I L L T G M S A S D L V  
*C. elegans* FRPR-3 M E G E N S I I N L T T I G V E D D V G T S E I I V V G G I S L T E S K S L Q E E D G L E F F S S L S L F F S C I M V C M C L A G A I M N T V S I F I F T R P S F R K R S I N V L L S G L S A S D I V  
*S. ratti* FRPR-3 -----M P P N A S S P E A A E T --F L P S D H H V L L P S D Q L I W A L S L F F S L L M A S L C V V C A V M N S I S I F I Y S R P A F R K R S I N V L L C G L S A S D L A  
*B. xylophilus* FRPR-3 -----M N S E N T N N I T G E Q ---Q Q F I V D N S I P K D L I P S L S M F A V L M A F L C V A G T V T N T L S I I I F A K A S S R R R S I N V L L C G L S A S D I C  
*G. pallida* FRPR-3 -----M N S D N S K N I T E E Q K S N E Q Q F D S I P L L D N Q D F I P S L S L V F A V L M A F L C V A G T V T N T L S I I I F A K A S S R R R S I N V L L C G L S A S D L S  
*M. hapla* FRPR-3  
*M. incognita* FRPR-3

Consensus

L L S V S V L M L C V G V N T L S L Y I Y T R S F R K R S I N V L L G L S A S D L

*A. suum* FRPR-3 L C L L A I P V F S I T Q I Q S F L P G I S --K H I T G H I L L F A Y P V T L M L Q S I S V W L L V S I T I D R Y L A V C Y P F K V R A Y C T R T R A T I I I L I V F F S I V Y N F V R F W E F T I  
*A. caninum* FRPR-3 V C V L S I P V F S ---S N H I H H L I P V S E K A I A L M F Y A Y P I T V M F O S M S V W L L V S I T V D R Y L A V C H P F E V G S Y S T R A R A L L T V F L I V V F S I A Y N F V R F W E F Q I  
*N. brasiliensis* FRPR-3 V C V L A I P V F A S T Q L Q Q V I P ---P T I T A M I M V Y L Y P V T I M F O S M S V W L L V S I T V D R Y L A V C H P F M V R V Y C T I N R A K I T V V V I T I V I I A F N F V R F W E F D I  
*H. contortus* FRPR-3 V C L L A I P V F I G T E L P T I F P K I E L P K I L A Y C I V Y L Y P I T I M A G C M S V W M L V S I T V D R Y L A V C H P F M V R V Y C T I N R A K I T V V V I T I V I I A F N F V R F W E F D I  
*C. elegans* FRPR-3 L C I L A I P V F C F S Q L Q Q I I P G I S F --T W L A Q I L V Y A Y P V T I M A Q T M S V W M L V S I T V D R Y L A V C H P F L V R V Y C T T R A L L T A V I F V S V G Y N F V R F W E Y T I  
*S. ratti* FRPR-3 L C V L A I P V F S M S P L E Y F M P G I P --P A I T G H L L V F C Y P V T L M A Q T M S V W M L V G I T I D R Y L A V C Y P F S V R I Y C T V R R A Q L T I G A I L I F S V G Y N L I R F W E Y R I  
*B. xylophilus* FRPR-3 L C I L A I P V F S L A Q L Q Q F I P ---P S I A N H L L V F C Y P L C L M A Q T M S V W M L V G I T I D R L A V C Y P F S I R I H C T V K R A R I I V L G T F L F S L F Y N L V R F W E Y R I  
*G. pallida* FRPR-3  
*M. hapla* FRPR-3  
*M. incognita* FRPR-3

Consensus

L C I L A I P V F S T Q L Q L I P L L P L A H L L V F Y P V T L M A Q S M S V W M L V S I T V D R Y L A V C H P F V R I Y C T R A L T V L L I V I F S V A Y N F V R F W E Y I

*A. suum* FRPR-3 D D S G G --T S I E S I V P L L R G D P L F M L L Y Q N I A T L L I T Q F L P L I V L C F L N L H V ---A R T I L E A G V Q R R ---E L V A S E K --R E H T A K M M L Y V V I V --F  
*A. caninum* FRPR-3 -----L S I V Q P L L R D S P L F L I W Y Q N I A T L L S Q F V L P L L V L C V L N L O V ---A R T I L M A E Q R R ---E L V A S E K --R E H T A K M M I F V V I V --F  
*N. brasiliensis* FRPR-3 V E S Q S --E E S L E A I V Q P L L R D N Q L F M L W Y Q N I A T L L S Q F V L P L L V L C V L N L O V ---A R T I L I A E Q R R ---E L V A S E K --R E H T A K M M I F V V I V --F  
*H. contortus* FRPR-3 P -----E S L E A I V Q P L L R D S A L F M L W Y Q N I A T L L S Q F V L P L L V L C I L N L O V S Q V A R T I L M A T E Q R R ---E L V A S E K --R E H T A K M M I F V V I T V F  
*C. elegans* FRPR-3 N F D V A P E N R I T E D L V V E K L R A N P H F L L W Y Q N I A T L V S Q F A F P L I V L C V L N I O V ---A R T I L E A S E Q R R ---E L V A S V K --R E H S T A K M M I M V V L V --F  
*S. ratti* FRPR-3 A E P -S --E E T G G F A F K L L R A D P I F M L Y Q N I A Y I I S O Y L L P L F V L C I L N L E V ---A K T I L K A T E Q R R ---E L V S V K --T E H Q T A K M M I F V V I V --F  
*B. xylophilus* FRPR-3 S D D P N ---M P E M L I V G L L R E N Q I Y M V L Y Q N I A M L L T Q F V L P L M V L C I L N L O V ---A K T I L E A G E T R R ---E L V A S E K --R E H S T A K M M L F V V I V --F  
*G. pallida* FRPR-3 N P S D V P ---S E P V V G L L R E D Y L Y M L L Y Q N A A T M L S Q F L L P L C V L C A L N F O V ---A S A I L A A V E Q R R E M W A E E L S A E Q --R E H K T A K M M I M V V I V --F  
*M. hapla* FRPR-3 D S N G E -----I V G L L R D D Y L F M L L Y Q N I A T T L S Q F L L P L C V L C P L N L O V ---A R S I L A A R E R R K N M L W T E L S S V F A S S R E Q S T A N I F C F I F L V --F  
*M. incognita* FRPR-3 D S N G E -----I V G L L R D D Y L F M L L Y Q N I A T T L S Q F L L P L C V L C P L N L O V ---A R S I L A A R E R R K N M L W T E L S S V F A S S R E Q S T A A M M I V V V I V --F

Consensus

S L E I V V P L L R D D L F M L L Y Q N I A T L L S Q F L L P L L V L C V L N L O V A R T I L A E Q R R E L V A S E K R E H T A K M M I F V V I V \_ F

*A. suum* FRPR-3 **LFCYALSMILNLAEILDEDLFRQPIGYLLNDVNNILVVN**SSSSSFIFYTKYSTR--**FRAQLR**-----  
*A. caninum* FRPR-3 **LVCYTF**SFILNVAEILFSSLEFRHPVGYLLNDINNILVVNTSSPFVYVVKYSTR--**YRNQLRT**MYGIRWFA**SKMKFV**DSKPLRGSERLVPTPN**GKALNSY**  
*N. brasiliensis* FRPR-3 **LVCYTF**SFILNVAEILFSSLEFRHPVGYLLNDINNILVVNTSSPFMFYVVKYSTR--**YRNQLRT**IYGIRWVA**AWMKFD**-----  
*H. contortus* FRPR-3 **LVCYTF**SFILNVAEILFSALFRHPVGYLLNDINNILVVNTSSPFVYVVKYSTR**SR**YRNQLRTIYGIRW**AAARFKFYDRK**-----  
*C. elegans* FRPR-3 **LVCYIF**SFILNWEILDKEITGGDIGWFMNDINNVLVVNSTSAIVFYVVKYSTR--**FRNQART**IPGIRWY**ASMSKFN**VYDTEATSNRTMVTRYKESMISI  
*S. ratti* FRPR-3 **LFCYTF**GFILNLEHLIYREIFD**TTIGYMLND**INNILVVFNSSSNFIFYVVKYSTR-----  
*B. xylophilus* FRPR-3 **LFCYML**SFCLNVLEIFNPDLFKNHIG**ELLNDV**NNILVVN**SSSSSFIFYV**KYSSR--**YRAQLRT**MPVIA**FAARCCF**ENRNTN**FSDKSGER**SENYMTLTGY  
*G. pallida* FRPR-3 **LFCYSL**SFCLNVLEILPDLFRSQVGYLLNDVNNILVLN**SSSSSFIFY**AQFSSR--**YRAQLMYL**LRQFRCVDLLFRW**IYGKKPV**YEGSPSGAL**SVGALL**  
*M. hapla* FRPR-3 **VFCYFL**SLCLNVLEM**FMPRLFR**STG**ELLNDV**NNILVLIN**SASSALFY**PSMNKD--CALE-----  
*M. incognita* FRPR-3 **VFCYFL**SLCLNVLEM**FIPRLFR**SSTG**ELLNDI**NNILVLIN**SASSALFY**ARFSSR--**YRAHLI**SLLRNFKFLDCLLPPPKV**SSFGGAET**PSCVFSGIGLRQ

Consensus LFCYTLSFILNVLEIL DLFR PIGYLLNDINNILVVN**SSSSSFIFYV**KYSTR YR QLRTL I W AA F

*A. suum* FRPR-3 -----  
*A. caninum* FRPR-3 TSIKTAFTDKQKNRR-----  
*N. brasiliensis* FRPR-3 -----  
*H. contortus* FRPR-3 -----  
*C. elegans* FRPR-3 RGTSTR**LSSSHN**LLYKPSYSKPCDI-----  
*S. ratti* FRPR-3 -----  
*B. xylophilus* FRPR-3 SSRQTVYTSATALDNSQVDTSLKPPV**RKF**-----  
*G. pallida* FRPR-3 G-----KQRLSTTVLSEWSHRT**PSPFLL**-----  
*M. hapla* FRPR-3 -----  
*M. incognita* FRPR-3 QNSYNINRQMSSTFLTVASCN**NNNN**NDYGGGGVTKQQQ**KRLRANSAN**PCPL

Consensus

#### 14. FRPR-18 homologues

*T. spiralis* FRPR-18 -----MDILLIIGLAAADNALLSGT PVYSVIALYTR-PSEQLMKMNHITVTL YPISW  
*T. muris* FRPR-18 -----CSVLMIIIVAVVGLIGNTFIQLFWQSSS-PTSM DILLTGLAAAD SALLSGT PVFSVIALYTS-PSVQLMKAMNYITVTL YPISW  
*A. suum* FRPR-18 SLRLVENVMDSQHLMA SAILLIVCIGVLGNLVSLFMR SRPHMRTASVNVLLSALSAYDLGLL VLSIPV FVVGLDPWQEDISAQYK YAYMLK FV YPVNL  
*N. brasiliensis* FRPR-18 -----MDSQQWMA CAIISLVIVGCFGNSLSLLF SRPHMRCFSV SIR-----SSQQ-----SAVTY LAYVLK WVPVNL  
*H. contortus* FRPR-18 -----MDSQQWMA CAIISLVIVGCFGNSLSLLF SRPHMRCFSV NVLLCALSFDLS LLLLSIPTFVITNLDLW-----SAVTY LAYVLK WVPVNL  
*C. elegans* FRPR-18 -----MESQQLMA CAIIVLVVLCIFGNSLSFLIF SRPHMRSSVNVLLCALSFFDFS LLTSLIPFVITNLDLWANDL-SLSTY MAYILK LLYPTNL  
*S. ratti* FRPR-18 -----SFLVYTRYAT-----SINILLTALSVIDICLLILATPVFVLPFMHIY-FSFIEDTFOAYVLO YIYPLNC  
*B. xylophilus* FRPR-18 -----MEEDNLQOYLASATIMVVVIGCLGNFLSLILFLRHS---SVNTLLAALSVDLCLLLLAVPVFVMPSLDINP-DQTSLYN FLSCVLKV YVPVNL  
*G. pallida* FRPR-18 -----MDTLRHILASSSLAMVIFGCFGNLSLILFLQRKT---SINILLSALAFIDIGLLFAIPVFLPFLDRDG--FITLESVQAIVVKFL YPTNL  
*M. hapla* FRPR-18 -----MELERHILASCTLSLIIIFGCFGNLSALVFLQRTS---SINILLTALSVIDFGLLFAIPVFLPFLQSG--EHFYSEQFOAIVIKFL YPVNL  
*M. incognita* FRPR-18 -----MELERHILASCTLAIIIFGCFGNLSALVFLQRTS---SINILLTALSVIDFGLLFAIPVFLPFLQSG--ELLYSEQFOAIVVKFL YPVNL  
  
Consensus LA A L IVIIGCFGN LS LLF R S SVNILLTALS ID GLLL AIPVFLP L W FLAYVLKFLYPVNL

*T. spiralis* FRPR-18 MAHCASVWTMVSISVERVYIAVCHPIAARSLSARRSV-AVICVVTTSVLYNFCRFWEYRID-----DHNRV PLLRSNELYQVFVHWMYFFTVF  
*T. muris* FRPR-18 MAHCASVWTMVSISVERVYIAVCHPIAARSLSARRSV-TCLVVIALLSVAVNFCRFWEYKLN-----HRNDV PFLRSNELYQVFVHWMYFFTVF  
*A. suum* FRPR-18 IMQTCSIYIMLLITVERWTA VCRPLQVRVWCSPKSR-IALILVVLCAIILNLRVFEYTFEVTPEGD--TVYARNLRDPDL YYYMIGYFTASYLITHF  
*N. brasiliensis* FRPR-18 IMQTCSVYTMVMITFERWTA VCRPLQVRVWCSPKSR-IAVGCIFVSAVLYNFARFWEYRIHTPDG---AIVERWLRDPAN YGYIIGYFTASYLITHF  
*H. contortus* FRPR-18 TMQTCSVYTMVMITFERWTA VCRPLHVSTWYAPRLSNHDLIVLLSCFLYLFTRFVYKLYKPTVI---VTFSGK YKITWVRGY IGYITLYVVTHF  
*C. elegans* FRPR-18 IMQTCSVYIMVMITFERWTA VCRPLQVRVWCSPKSR-NAILVLIIVSAFLYNFVRFWEYRFVVTESG---ALVWKWLRDPGKIRWY YGYITLYIVTHF  
*S. ratti* FRPR-18 ISQTCSVYVMVFIITIERWTAIAKPLHVRFCITKSAK-MILGTVIIISASINYIPRFWEYED-----HTTKRI LRDITVLYENYMYGYITLYLLTHF  
*B. xylophilus* FRPR-18 MFQTCSIYIMVLIITIERWTA VCKPLQVRIWCTARTSR-MALLCILVFAIAYNVIRFWEYQI---VETEKGLDYTRNLRDINRHPHYVIFYYTGLYLLTHF  
*G. pallida* FRPR-18 MFQTWSIYTIIVLITAERWLAICRPLHVRSLCTPRTAK-WSLIFTALFSAIYNIVRFWEYSRSVWAPDGSLEFERNLRDPTEHFYVILWYYSMLFLVTHF  
*M. hapla* FRPR-18 IFQTCSIYTIIVLITAERWLAICRPLHVRSLCTPRTAK-RSLICIFGFSIAYNIVRFWEYTL---IESDGSLSQRNLRNPNEHPWYMLGYYSLLFLLSHF  
*M. incognita* FRPR-18 IFQTCSIYTIIVLITAERYLAICRPLHVRSLCTPRTAK-RSLFFILGFSIAYNIVRFWEYTL---IESDGSLSQRNLRNPNDHPWYMLGYYSLLFLLSHF  
  
Consensus I QTCSVYTMVLIITIERWLA VCRPL VRSWCTPR SK ALL ILV AILYNIVRFWEY L F R LRDP HP YMIGYITLYLLTHF

*T. spiralis* FRPR-18 GLPLFTLASVNCIVHTIFARRLRATMSRSQLRQHLAVMMIVLVVIFVSNLAFVNLAE AAG-FFDNMKDDKYFYCLMDVNNLLVEFNSSINLYL  
*T. muris* FRPR-18 GIPLLTLASVNCIVNTIFARRLRSTMSRSQLRQHLAVMMVVLVLFVSNALAFVNLAE AAG-FFDNVMYDRYFYCLTDVNNLLLEFNSSINLFL  
*A. suum* FRPR-18 LIPFGIIVMNGHVCCSMITLRRARLALTRCQREYSTTFMLMMVTVMFALCNTLPFLNLNVE CALPFFSNPE TMYFAYQLNDISNLLVVLNSATTFII  
*N. brasiliensis* FRPR-18 LVPTIMAVLNGSVIVAMWGRMRQMQMTRCQREQSTTVMLLVTVFAVCNTLPFLNLNVE SVFPDFVDPRTTHAYT LNDLSNLLVVLNSATTFIV  
*H. contortus* FRPR-18 LLPFTIMAVLNGSVIVTMWGRMRQMLTRCQREQSTTVMLLVITLFAVCNTLPFLNLNVE SVFPDFVDPRTTHAYT LNDLSNLLVVLNSATTFIV  
*C. elegans* FRPR-18 LVPTSVMAFANGHVIVAMCKLSKTRQMLTRCQREQSTTVMLLVITVFAICNTLPFLNLNVE SIFPTLFQDESTRG LAYW LNDLSNLLVVLNSGTTFII  
*S. ratti* FRPR-18 CIPFAAIFFNMHVIFLILQKKEKRLNLSQRKEIKTTVMILIVTVMFACINVLTFIMNLWENINPTLFSDPKILSMAYMFNDLANFLVILNSASTFII  
*B. xylophilus* FRPR-18 LIPFSVLIIMNGHVCKQITQLRRARLMLTRCQREQSTTVMLLVTVFAVCNTLPFLNLNVE CIKRDLEAEASTAWAYQLNDLSNLLVVLNSSTTWIV  
*G. pallida* FRPR-18 LLPFTIFTLNAVCHRILRLRSVREQLTMK-----MLLVITLAFALCNLPFLNLNVE CIKRDLEAEARTAQMAYLNDLANFLVILNSSTTWIF  
*M. hapla* FRPR-18 LLPFTIISLNGLAHRILHLRSIREQLTNKQLTEHNTAMLLLVTL SFALCNVLPFLNLNVE CVQSDLFINERTASTAFILNDLANFLVVLNSSTTWIY  
*M. incognita* FRPR-18 LLPFTIISLNGLAHRILHLRSIREQLTNKQLREHNTAMLLLVTL SFALCNVLPFLNLNVE CVQSDLFVNES TAATAFILNDLANFLVVLNSSTTWIY

Consensus    LLPF I LNG VI    ILRLRRIR    LTRQQ RE    TTVMLLVVTLVFALCNTLPFLNL E I    DLF    T    IAY LNDSLNLVLSSTTFII

*T. spiralis* FRPR-18    YLIFCRRFRTRFCRMLRCL-----NTASLPLPFAFPPTHADKEPEYKSTGLNLSLQRRNLNNSFDVTSAYYD-----  
*T. muris* FRPR-18    YLIFCRRLRARFWYIFRCS-----KPEGKIPL---FPFRSVERMSSLRSTSAIYRR---RSS-----  
*A. suum* FRPR-18    YFLFSAKYRQTLLEFLRHGCFWDHSRGQCYDNGRSHSLRYVSSTRKHSSANALRSENLLAPAMQKRTERSASVQCATTAPKSLFREASYRTPTPHRCV  
*N. brasiliensis* FRPR-18    YFSFSEKYRQTLIFLIKNGCCASIS----DYNNTAMSRITASMRMNN-----SVDLYRAGSKMSTSSR-----  
*H. contortus* FRPR-18    YFTFSEKYRQTFIFLIKNGCCASIS----DYNTYTAMSRITASMRVNNS----TSDLQRAGSKKSTSR-----  
*C. elegans* FRPR-18    YFTFSEKYRQTLVFLKNGCCATVS----DYNNTAMSRITASMRISSET----GGQIQRQGSKMSNSRSDVLLKPIYMQKRSEFSEYNERTCKHL  
*S. ratti* FRPR-18    YFLFSEKYRLLFDLFR-----YGCTKTKRENYNNTFSRSLRISIR-----  
*B. xylophilus* FRPR-18    YILFSAKYRETAMRLLWRCNTVYEKDVKYNLSRTHSMRASARKGPATSCPTESIRTLSRTNRSNSECDETRKRVSSIIISDKFKRDSKNNKTSNGYR  
*G. pallida* FRPR-18    YTSFSAKFRREGVAALFGLLSQD-----  
*M. hapla* FRPR-18    YAVFSAKYREGVAYLFG-----LRTLDRRRSGLVTNTIEERSNSACSNYNSATGGIQYFEPNKL-----  
*M. incognita* FRPR-18    YAVFSAKYREGVAYLFG-----LRTLDRRRSGLVTNTVEERSNSACSNYNSATGGMQNFEPNKL-----

Consensus    Y IFS KYR    L FILR    AM RS S    SAS    V

*T. spiralis* FRPR-18    -----  
*T. muris* FRPR-18    -----  
*A. suum* FRPR-18    GKFREKLN GALPETSRLRLTEQASKSDS-----  
*N. brasiliensis* FRPR-18    -----  
*H. contortus* FRPR-18    -----  
*C. elegans* FRPR-18    APFEEHKLPKLPSEKRRKKLHKMSAVEHRGMPEITITFSEDLPDGEPDSPCQPC  
*S. ratti* FRPR-18    -----  
*B. xylophilus* FRPR-18    VSTQASKKESSSRSLSEVQPSTELLSPPPMTFRAPSPKWSEQPDREPV-----  
*G. pallida* FRPR-18    -----  
*M. hapla* FRPR-18    -----  
*M. incognita* FRPR-18    -----

Consensus
