# Supplementary material for: New insights into the FLPergic complements of parasitic nematodes: Informing deorphanisation approaches
Source: PubMed Central journal article supplement (PMC4405611; doi:10.1016/j.euprot.2014.04.002), 2014-04-19
Supplement: mmc5.pdf [file mmc5.pdf]

**Table 2. *flp* gene BLAST query GenBank accession numbers.**

| <i>flp</i> | GenBank Accession Number |
|------------|--------------------------|
| 1          | AAC46464.1               |
| 2          | CAA90031.1               |
| 3          | CAA90030.1               |
| 4          | NP_496173.1              |
| 5          | NP_509445.1              |
| 6          | NP_505444.1              |
| 7          | NP_508985.1              |
| 8          | CAA93746.1               |
| 9          | AAC08946.1               |
| 10         | CCD63311.1               |
| 11         | CCD68560.1               |
| 12         | CCD63264.1               |
| 13         | NP_501255.1              |
| 14         | CAA21533.2               |
| 15         | NP_499820.1              |
| 16         | CAE17795.1               |
| 17         | NP_503051.1              |
| 18         | NP_508514.2              |
| 19         | NP_509776.1              |
| 20         | CCD65290.1               |
| 21         | NP_505011.2              |
| 22         | NP_492344.2              |
| 23         | NP_498907.3              |
| 24         | CCD65361.1               |
| 25         | CAE54900.1               |
| 26         | NP_741827.1              |
| 27         | CCD65048.1               |
| 28         | CAE17946.1               |
| 29         | BQ837449                 |
| 30         | AW588622                 |
| 31         | BM882182                 |
| 32         | CAA93671.2               |
| 33         | CAD82918.1               |
| 34         | CCD62625.1               |
