# Supplementary material for: New insights into the FLPergic complements of parasitic nematodes: Informing deorphanisation approaches
Source: PubMed Central journal article supplement (PMC4405611; doi:10.1016/j.euprot.2014.04.002), 2014-04-19
Supplement: mmc6.pdf [file mmc6.pdf]

**Table 3. *flp* / putative *flp*-GPCR BLAST query GenBank accession numbers.**

| <i>flp</i> / putative- <i>flp</i> -GPCR | GenBank Accession Number |
|-----------------------------------------|--------------------------|
| <i>npr-1</i> *                          | CCD67081.1               |
| <i>npr-2</i>                            | CAD59155.1               |
| <i>npr-3</i> *                          | CAB05681.1               |
| <i>npr-4</i> *                          | NP_510101.2              |
| <i>npr-5</i> *                          | CCD70460.1               |
| <i>npr-6</i>                            | NP_509725.2              |
| <i>npr-7</i>                            | NP_509570.3              |
| <i>npr-10</i> *                         | CAA15513.1               |
| <i>npr-11</i> *                         | NP_508234.2              |
| <i>npr-12</i>                           | CCD62029.1               |
| <i>npr-13</i>                           | NP_506659.2              |
| <i>npr-22</i> *                         | CCD64003.1               |
| <i>tkr-3</i>                            | CCD61149.1               |
| <i>frpr-3</i> *                         | NP_505004.1              |
| <i>frpr-4</i>                           | NP_494987.2              |
| <i>frpr-6</i>                           | CCD61444.1               |
| <i>frpr-11</i>                          | NP_505301.1              |
| <i>frpr-12</i>                          | CCD72369.1               |
| <i>frpr-16</i>                          | CCD72321.1               |
| <i>frpr-18</i> *                        | CCD68155.1               |
| <i>egl-6</i> *                          | ACG61341.1               |
| <i>dmsr-1</i>                           | CAA98492.1               |
| <i>dmsr-2</i>                           | CCD68134.1               |
| <i>dmsr-3</i>                           | CAB55110.1               |
| <i>dmsr-4</i>                           | NP_493716.1              |
| <i>dmsr-5</i>                           | CAA19526.1               |
| <i>dmsr-6</i>                           | NP_497004.1              |
| <i>dmsr-7</i>                           | NP_504431.2              |
| <i>dmsr-8</i>                           | NP_505697.2              |
| <i>dmsr-9</i>                           | CCD72499.1               |
| <i>dmsr-10</i>                          | NP_504724.1              |
| <i>dmsr-11</i>                          | NP_504725.2              |
| <i>dmsr-12</i>                          | NP_504726.1              |
| <i>dmsr-13</i>                          | NP_504730.1              |
| <i>dmsr-14</i>                          | NP_504729.1              |
| <i>dmsr-15</i>                          | CCD68165.1               |
| <i>dmsr-16</i>                          | CCD72487.1               |
